# Supplementary material for: The aberrant epigenome of DNMT3B -mutated ICF1 patient iPSCs is amenable to correction, with the exception of a subset of regions with H3K4me3- and/or CTCF-based epigenetic memory
Source: HighWire-hosted journal article supplement (doi:10.1101/gr.276986.122), 2023-02-01
Supplement: Supplemental_Table_S3_.xlsx [file Supplemental_Table_S3_.xlsx]

## Sheet: Legends
Supplemental_Table_S3
pR_WT1_hypoDMRs	Lists of hypo-DMRs identified in ICF1 iPSCs and their categorization based on genomic annotation, rescue status in isogenic corrected clones and overlap with CGI and/or GH promoters/enhancers. Hypo-DMR score denotes the difference in methylation percentages between the ICF1 and WT1 iPSCs. Group assignment and rescue category (full, partial, no rescue) of each hypo-DMR is reported in Fig. 1A.
pR_WT1_hypoDMRs	Lists of hypo-DMRs identified in ICF1 iPSCs and their categorization based on genomic annotation, rescue status in isogenic corrected clones and overlap with CGI and/or GH promoters/enhancers. Hypo-DMR score denotes the difference in methylation percentages between the ICF1 and WT1 iPSCs. Group assignment and rescue category (full, partial, no rescue) of each hypo-DMR is reported in Fig. 1A.
GO-BP_promoter_hypoDMR_genes	List of biological processes (PANTHER) enriched among the genes associated with hypo-DMRs identified in ICF1 iPSCs and annotated to promoter or gene body. The column IDs are indicated as provided by the PANTHER software.
GO-BP_genebody_hypoDMR_genes	List of biological processes (PANTHER) enriched among the genes associated with hypo-DMRs identified in ICF1 iPSCs and annotated to promoter or gene body. The column IDs are indicated as provided by the PANTHER software.
pR_all_hypodmr_dec_dnmt3b	HOMER results showing the known Transcription Factor motifs enriched at ICF1 hypo-DMRs overlapping with significantly decreased DNMT3B binding regions (n=4908).
pG_all_hypodmr_dec_dnmt3b	HOMER results showing the known Transcription Factor motifs enriched at ICF1 hypo-DMRs overlapping with significantly decreased DNMT3B binding regions (n=3524).

## Sheet: pR_WT1_hypoDMRs
HypoDMR_position	HypoDMR_score	Group	ENSG	gene_name	Annotation	DMR_Rescue_category	Regulatory_elements
chrX-99970001-99971000	-48	group_4	ENSG00000229946	B3GNT2P1	Distal Intergenic	full_rescue	NA
chrX-9912001-9913000	-29.2988	group_3	ENSG00000146950	SHROOM2	5' UTR	full_rescue	GH_only
chrX-9848001-9849000	-39.6552	group_4	ENSG00000146950	SHROOM2	Intron (ENST00000380913/ENSG00000146950, intron 1 of 9)	full_rescue	GH_only
chrX-9832001-9833000	-45.0388	group_3	ENSG00000146950	SHROOM2	Intron (ENST00000380913/ENSG00000146950, intron 1 of 9)	full_rescue	NA
chrX-9827001-9828000	-27.4603	group_4	ENSG00000146950	SHROOM2	Intron (ENST00000380913/ENSG00000146950, intron 1 of 9)	full_rescue	NA
chrX-9746001-9747000	-57.625	group_2	ENSG00000101850	GPR143	Exon (ENST00000467482/ENSG00000101850, exon 5 of 9)	full_rescue	NA
chrX-9709001-9710000	-32.1523	group_1	ENSG00000101849	TBL1X	Exon (ENST00000407597/ENSG00000101849, exon 14 of 18)	partial_rescue	NA
chrX-9682001-9683000	-26.4286	group_3	ENSG00000101849	TBL1X	Intron (ENST00000407597/ENSG00000101849, intron 5 of 17)	full_rescue	NA
chrX-968001-969000	-40	group_4	ENSG00000237531	RP11-309M23.1	Distal Intergenic	full_rescue	NA
chrX-9573001-9574000	-46.0754	group_3	ENSG00000101849	TBL1X	Intron (ENST00000407597/ENSG00000101849, intron 2 of 17)	full_rescue	NA
chrX-95665001-95666000	-28.0922	group_4	ENSG00000235425	RPS7P13	Distal Intergenic	full_rescue	NA
chrX-955001-956000	-29.6296	group_4	ENSG00000237531	RP11-309M23.1	Distal Intergenic	full_rescue	NA
chrX-9467001-9468000	-44.5776	group_1	ENSG00000101849	TBL1X	Intron (ENST00000407597/ENSG00000101849, intron 1 of 17)	full_rescue	CGI_and_GH
chrX-935001-936000	-33.3333	group_4	ENSG00000237531	RP11-309M23.1	Distal Intergenic	full_rescue	NA
chrX-93412001-93413000	-31.7801	group_4	ENSG00000237381	RP3-455H14.1	Distal Intergenic	full_rescue	NA
chrX-9328001-9329000	-43.5897	group_4	ENSG00000177138	FAM9B	Distal Intergenic	full_rescue	NA
chrX-9225001-9226000	-26.1324	group_4	ENSG00000177138	FAM9B	Intron (ENST00000651278/ENSG00000177138, intron 1 of 10)	partial_rescue	NA
chrX-91861001-91862000	-25.4963	group_4	ENSG00000102290	PCDH11X	Intron (ENST00000298274/ENSG00000102290, intron 4 of 5)	full_rescue	NA
chrX-9069001-9070000	-30.1887	group_4	ENSG00000177138	FAM9B	Intron (ENST00000651278/ENSG00000177138, intron 3 of 10)	full_rescue	NA
chrX-8874001-8875000	-27.2436	group_4	ENSG00000229012	GS1-542M4.4	Distal Intergenic	full_rescue	NA
chrX-883001-884000	-54.6041	group_3	ENSG00000237531	RP11-309M23.1	Distal Intergenic	full_rescue	NA
chrX-8733001-8734000	-28.2398	group_1	ENSG00000011201	ANOS1	Promoter (<=1kb)	full_rescue	CGI_and_GH
chrX-87264001-87265000	-57.1429	group_4	ENSG00000200422	SNORD45	Distal Intergenic	full_rescue	NA
chrX-869001-870000	-57.198	group_3	ENSG00000237531	RP11-309M23.1	Distal Intergenic	full_rescue	NA
chrX-86610001-86611000	-31.7073	group_4	ENSG00000126733	DACH2	Intron (ENST00000373125/ENSG00000126733, intron 3 of 11)	full_rescue	NA
chrX-86341001-86342000	-100	group_3	ENSG00000126733	DACH2	Intron (ENST00000373125/ENSG00000126733, intron 1 of 11)	full_rescue	NA
chrX-86160001-86161000	-29.6296	group_4	ENSG00000126733	DACH2	Exon (ENST00000416082/ENSG00000215093, exon 1 of 1)	full_rescue	NA
chrX-85682001-85683000	-61.5484	group_2	ENSG00000283435	MIR1321	Distal Intergenic	no_rescue	NA
chrX-85635001-85636000	-55.0813	group_3	ENSG00000283435	MIR1321	Distal Intergenic	full_rescue	NA
chrX-85622001-85623000	-54.1962	group_3	ENSG00000283435	MIR1321	Distal Intergenic	no_rescue	NA
chrX-85619001-85620000	-54.7847	group_2	ENSG00000283435	MIR1321	Distal Intergenic	full_rescue	NA
chrX-85575001-85576000	-32.3529	group_4	ENSG00000124429	POF1B	Distal Intergenic	partial_rescue	NA
chrX-85441001-85442000	-38	group_4	ENSG00000124429	POF1B	Distal Intergenic	partial_rescue	NA
chrX-85363001-85364000	-67.8322	group_3	ENSG00000124429	POF1B	Intron (ENST00000262753/ENSG00000124429, intron 3 of 16)	full_rescue	NA
chrX-85205001-85206000	-43.5	group_3	ENSG00000184788	SATL1	Intron (ENST00000644105/ENSG00000184788, intron 2 of 7)	full_rescue	NA
chrX-85202001-85203000	-33.5678	group_4	ENSG00000184788	SATL1	Intron (ENST00000644105/ENSG00000184788, intron 2 of 7)	full_rescue	NA
chrX-84975001-84976000	-29.0254	group_4	ENSG00000230781	RP1-215K18.4	Intron (ENST00000456978/ENSG00000230781, intron 2 of 2)	full_rescue	NA
chrX-84743001-84744000	-36.2775	group_4	ENSG00000237211	SETP4	Distal Intergenic	full_rescue	NA
chrX-84739001-84740000	-31.555	group_4	ENSG00000237211	SETP4	Distal Intergenic	full_rescue	NA
chrX-84724001-84725000	-41.3793	group_3	ENSG00000237211	SETP4	Distal Intergenic	no_rescue	NA
chrX-84680001-84681000	-61.1111	group_3	ENSG00000237211	SETP4	Distal Intergenic	partial_rescue	NA
chrX-84659001-84660000	-33.7662	group_4	ENSG00000237211	SETP4	Distal Intergenic	full_rescue	NA
chrX-84634001-84635000	-28.7989	group_4	ENSG00000237211	SETP4	Distal Intergenic	full_rescue	NA
chrX-84572001-84573000	-65.2586	group_3	ENSG00000165259	HDX	Distal Intergenic	full_rescue	NA
chrX-84571001-84572000	-48.6765	group_3	ENSG00000165259	HDX	Distal Intergenic	full_rescue	NA
chrX-84274001-84275000	-51.6964	group_2	ENSG00000221494	MIR548I4	Distal Intergenic	full_rescue	NA
chrX-84267001-84268000	-36.8116	group_3	ENSG00000221494	MIR548I4	Distal Intergenic	full_rescue	NA
chrX-84254001-84255000	-70.8333	group_3	ENSG00000221494	MIR548I4	Distal Intergenic	full_rescue	NA
chrX-84190001-84191000	-55.5556	group_3	ENSG00000072133	RPS6KA6	Promoter (1-2kb)	full_rescue	CGI_and_GH
chrX-84009001-84010000	-48.5714	group_4	ENSG00000183035	CYLC1	Distal Intergenic	full_rescue	NA
chrX-83985001-83986000	-35.3723	group_4	ENSG00000183035	CYLC1	Distal Intergenic	full_rescue	NA
chrX-83971001-83972000	-35	group_4	ENSG00000183035	CYLC1	Distal Intergenic	partial_rescue	NA
chrX-83888001-83889000	-35.0877	group_4	ENSG00000183035	CYLC1	Distal Intergenic	full_rescue	NA
chrX-83836001-83837000	-42.1919	group_4	ENSG00000183035	CYLC1	Distal Intergenic	full_rescue	NA
chrX-83671001-83672000	-27.3973	group_4	ENSG00000215102	TERF1P4	Distal Intergenic	full_rescue	NA
chrX-83601001-83602000	-43.0127	group_4	ENSG00000236870	RP1-223D17.1	Distal Intergenic	full_rescue	NA
chrX-83594001-83595000	-72.9055	group_2	ENSG00000236870	RP1-223D17.1	Distal Intergenic	partial_rescue	NA
chrX-83580001-83581000	-33.1537	group_4	ENSG00000236870	RP1-223D17.1	Distal Intergenic	full_rescue	NA
chrX-83502001-83503000	-75	group_2	ENSG00000196767	POU3F4	Distal Intergenic	partial_rescue	NA
chrX-83461001-83462000	-46.6667	group_4	ENSG00000196767	POU3F4	Distal Intergenic	full_rescue	NA
chrX-83435001-83436000	-55.7692	group_4	ENSG00000196767	POU3F4	Distal Intergenic	full_rescue	NA
chrX-83418001-83419000	-47.0865	group_4	ENSG00000196767	POU3F4	Distal Intergenic	full_rescue	NA
chrX-833001-834000	-28.5714	group_4	ENSG00000237531	RP11-309M23.1	Distal Intergenic	full_rescue	NA
chrX-83287001-83288000	-56.9048	group_4	ENSG00000196767	POU3F4	Distal Intergenic	full_rescue	NA
chrX-83186001-83187000	-40.0231	group_4	ENSG00000232735	ATG4AP1	Distal Intergenic	full_rescue	NA
chrX-83177001-83178000	-29.4163	group_4	ENSG00000232735	ATG4AP1	Distal Intergenic	full_rescue	NA
chrX-83155001-83156000	-47.0588	group_4	ENSG00000232735	ATG4AP1	Distal Intergenic	full_rescue	NA
chrX-83111001-83112000	-46.5517	group_4	ENSG00000232735	ATG4AP1	Distal Intergenic	full_rescue	NA
chrX-82552001-82553000	-27.2018	group_4	ENSG00000202183	SNORA4	Distal Intergenic	full_rescue	NA
chrX-82142001-82143000	-28.7493	group_4	ENSG00000206826	RNU6-974P	Distal Intergenic	full_rescue	NA
chrX-82115001-82116000	-57.971	group_3	ENSG00000206826	RNU6-974P	Distal Intergenic	full_rescue	NA
chrX-82073001-82074000	-58.3333	group_4	ENSG00000206826	RNU6-974P	Distal Intergenic	full_rescue	NA
chrX-81940001-81941000	-33.8068	group_4	ENSG00000206826	RNU6-974P	Distal Intergenic	full_rescue	NA
chrX-81866001-81867000	-48.5197	group_3	ENSG00000206826	RNU6-974P	Distal Intergenic	full_rescue	NA
chrX-81788001-81789000	-61.3082	group_3	ENSG00000233446	XXyac-YR12DB5.1	Distal Intergenic	full_rescue	NA
chrX-81535001-81536000	-46.3939	group_3	ENSG00000288059	NA	Distal Intergenic	full_rescue	NA
chrX-81345001-81346000	-38.059	group_4	ENSG00000231875	RP11-346E8.1	Distal Intergenic	partial_rescue	NA
chrX-81344001-81345000	-29.1667	group_4	ENSG00000231875	RP11-346E8.1	Distal Intergenic	partial_rescue	NA
chrX-81328001-81329000	-45.5758	group_3	ENSG00000231875	RP11-346E8.1	Distal Intergenic	partial_rescue	NA
chrX-81280001-81281000	-64.3182	group_2	ENSG00000131171	SH3BGRL	Intron (ENST00000373212/ENSG00000131171, intron 3 of 3)	full_rescue	NA
chrX-81175001-81176000	-87.8788	group_3	ENSG00000198157	HMGN5	Intron (ENST00000358130/ENSG00000198157, intron 1 of 6)	full_rescue	NA
chrX-81010001-81011000	-58.8235	group_3	ENSG00000284618	NA	Distal Intergenic	partial_rescue	NA
chrX-80929001-80930000	-31.9464	group_4	ENSG00000073905	VDAC1P1	Promoter (<=1kb)	full_rescue	NA
chrX-80574001-80575000	-47.0644	group_4	ENSG00000228612	HK2P1	Promoter (<=1kb)	full_rescue	CGI_only
chrX-80523001-80524000	-42.735	group_4	ENSG00000230247	HNRNPH3P1	Distal Intergenic	full_rescue	NA
chrX-805001-806000	-36.5277	group_3	ENSG00000185960	SHOX	Distal Intergenic	full_rescue	NA
chrX-80462001-80463000	-62.5	group_3	ENSG00000230247	HNRNPH3P1	Distal Intergenic	partial_rescue	NA
chrX-80312001-80313000	-31.6443	group_4	ENSG00000278530	CHMP1B2P	Intron (ENST00000614414/ENSG00000278530, intron 1 of 5)	partial_rescue	NA
chrX-80273001-80274000	-27.5442	group_4	ENSG00000278530	CHMP1B2P	Exon (ENST00000399581/ENSG00000278530, exon 7 of 8)	full_rescue	NA
chrX-80247001-80248000	-38.5864	group_3	ENSG00000278530	CHMP1B2P	Intron (ENST00000614414/ENSG00000278530, intron 5 of 5)	full_rescue	NA
chrX-80233001-80234000	-43.9286	group_4	ENSG00000278530	CHMP1B2P	Exon (ENST00000614414/ENSG00000278530, exon 6 of 6)	full_rescue	NA
chrX-80072001-80073000	-63.4921	group_3	ENSG00000122145	TBX22	Distal Intergenic	full_rescue	NA
chrX-80059001-80060000	-66.1905	group_3	ENSG00000122145	TBX22	Distal Intergenic	full_rescue	NA
chrX-80042001-80043000	-100	group_3	ENSG00000122145	TBX22	Distal Intergenic	full_rescue	NA
chrX-80011001-80012000	-27.962	group_4	ENSG00000122145	TBX22	Distal Intergenic	full_rescue	NA
chrX-79977001-79978000	-62.8571	group_3	ENSG00000122145	TBX22	Distal Intergenic	full_rescue	NA
chrX-79956001-79957000	-31.7204	group_4	ENSG00000122145	TBX22	Distal Intergenic	partial_rescue	NA
chrX-79944001-79945000	-31.8463	group_4	ENSG00000122145	TBX22	Distal Intergenic	full_rescue	NA
chrX-79827001-79828000	-25.8021	group_4	ENSG00000122145	TBX22	Distal Intergenic	partial_rescue	NA
chrX-79777001-79778000	-80	group_3	ENSG00000122145	TBX22	Distal Intergenic	full_rescue	NA
chrX-79738001-79739000	-46.1538	group_3	ENSG00000122145	TBX22	Distal Intergenic	partial_rescue	NA
chrX-79721001-79722000	-37.8873	group_4	ENSG00000122145	TBX22	Distal Intergenic	full_rescue	NA
chrX-79628001-79629000	-32.2391	group_3	ENSG00000270268	RP1-164L12.1	Distal Intergenic	full_rescue	NA
chrX-7961001-7962000	-55	group_2	ENSG00000285679	NA	Intron (ENST00000659022/ENSG00000285679, intron 1 of 3)	partial_rescue	NA
chrX-79554001-79555000	-58.3333	group_3	ENSG00000270268	RP1-164L12.1	Distal Intergenic	full_rescue	NA
chrX-79515001-79516000	-35.5879	group_3	ENSG00000270268	RP1-164L12.1	Distal Intergenic	full_rescue	NA
chrX-795001-796000	-32.2581	group_4	ENSG00000185960	SHOX	Distal Intergenic	full_rescue	NA
chrX-79456001-79457000	-69.2308	group_3	ENSG00000270268	RP1-164L12.1	Distal Intergenic	full_rescue	NA
chrX-79403001-79404000	-50	group_4	ENSG00000270268	RP1-164L12.1	Distal Intergenic	full_rescue	NA
chrX-793001-794000	-31.0473	group_4	ENSG00000185960	SHOX	Distal Intergenic	full_rescue	CGI_only
chrX-79288001-79289000	-38.969	group_4	ENSG00000225025	KIF4CP	Distal Intergenic	full_rescue	NA
chrX-7923001-7924000	-26.8943	group_4	ENSG00000006757	PNPLA4	Intron (ENST00000381042/ENSG00000006757, intron 2 of 6)	no_rescue	GH_only
chrX-7919001-7920000	-35.2273	group_4	ENSG00000006757	PNPLA4	Intron (ENST00000381042/ENSG00000006757, intron 4 of 6)	partial_rescue	NA
chrX-79051001-79052000	-39.899	group_4	ENSG00000232168	P2RY10P2	Distal Intergenic	full_rescue	NA
chrX-79050001-79051000	-55	group_4	ENSG00000232168	P2RY10P2	Distal Intergenic	full_rescue	NA
chrX-79032001-79033000	-54.1667	group_3	ENSG00000232168	P2RY10P2	Distal Intergenic	full_rescue	NA
chrX-78935001-78936000	-25.584	group_4	ENSG00000078589	P2RY10	Distal Intergenic	full_rescue	NA
chrX-789001-790000	-38.5788	group_3	ENSG00000185960	SHOX	Distal Intergenic	full_rescue	CGI_only
chrX-78866001-78867000	-54.4227	group_4	ENSG00000283622	MIR4328	Distal Intergenic	full_rescue	NA
chrX-78810001-78811000	-77.381	group_3	ENSG00000227645	RPL7P54	Distal Intergenic	full_rescue	NA
chrX-78787001-78788000	-36.9863	group_4	ENSG00000227645	RPL7P54	Distal Intergenic	partial_rescue	NA
chrX-78785001-78786000	-31.1111	group_4	ENSG00000227645	RPL7P54	Distal Intergenic	full_rescue	NA
chrX-7878001-7879000	-37.6515	group_4	ENSG00000274923	GS1-214D18.3	Distal Intergenic	partial_rescue	NA
chrX-78657001-78658000	-57.1429	group_4	ENSG00000179300	ZCCHC5	Exon (ENST00000321110/ENSG00000179300, exon 2 of 2)	full_rescue	GH_only
chrX-78508001-78509000	-25.5823	group_4	ENSG00000224755	HMGN1P34	Distal Intergenic	full_rescue	NA
chrX-78471001-78472000	-25.861	group_4	ENSG00000224755	HMGN1P34	Distal Intergenic	full_rescue	NA
chrX-78294001-78295000	-36.9565	group_4	ENSG00000173198	CYSLTR1	Intron (ENST00000373304/ENSG00000173198, intron 1 of 2)	full_rescue	NA
chrX-78232001-78233000	-56.0976	group_3	ENSG00000223592	FNDC3CP	Distal Intergenic	full_rescue	NA
chrX-7817001-7818000	-50	group_4	ENSG00000182583	VCX	Distal Intergenic	full_rescue	NA
chrX-78158001-78159000	-50.2703	group_3	ENSG00000223592	FNDC3CP	Distal Intergenic	full_rescue	NA
chrX-78028001-78029000	-70.7364	group_3	ENSG00000165240	ATP7A	Intron (ENST00000343533/ENSG00000165240, intron 13 of 21)	full_rescue	NA
chrX-77962001-77963000	-30.8824	group_4	ENSG00000165240	ATP7A	5' UTR	partial_rescue	NA
chrX-77872001-77873000	-32.1505	group_4	ENSG00000102158	MAGT1	Intron (ENST00000618282/ENSG00000102158, intron 2 of 9)	full_rescue	NA
chrX-77871001-77872000	-58.6207	group_3	ENSG00000102158	MAGT1	Intron (ENST00000618282/ENSG00000102158, intron 2 of 9)	partial_rescue	NA
chrX-77849001-77850000	-50	group_4	ENSG00000102158	MAGT1	Intron (ENST00000618282/ENSG00000102158, intron 7 of 9)	full_rescue	NA
chrX-77798001-77799000	-55.3846	group_4	ENSG00000085224	ATRX	Distal Intergenic	full_rescue	NA
chrX-77774001-77775000	-26.0244	group_4	ENSG00000085224	ATRX	Intron (ENST00000373344/ENSG00000085224, intron 1 of 34)	full_rescue	NA
chrX-77732001-77733000	-33.8625	group_4	ENSG00000085224	ATRX	Intron (ENST00000373344/ENSG00000085224, intron 1 of 34)	full_rescue	NA
chrX-77704001-77705000	-52.6316	group_3	ENSG00000085224	ATRX	Intron (ENST00000373344/ENSG00000085224, intron 2 of 34)	no_rescue	NA
chrX-77663001-77664000	-26.9295	group_4	ENSG00000085224	ATRX	3' UTR	full_rescue	NA
chrX-77510001-77511000	-35.7405	group_4	ENSG00000085224	ATRX	Intron (ENST00000373344/ENSG00000085224, intron 34 of 34)	full_rescue	NA
chrX-77481001-77482000	-41.4286	group_4	ENSG00000196468	FGF16	Distal Intergenic	full_rescue	NA
chrX-77471001-77472000	-51.4321	group_4	ENSG00000196468	FGF16	Distal Intergenic	full_rescue	NA
chrX-77468001-77469000	-37.1212	group_3	ENSG00000196468	FGF16	Distal Intergenic	partial_rescue	NA
chrX-77467001-77468000	-46.3415	group_4	ENSG00000196468	FGF16	Distal Intergenic	full_rescue	NA
chrX-77450001-77451000	-28.9474	group_4	ENSG00000196468	FGF16	Intron (ENST00000439435/ENSG00000196468, intron 1 of 2)	full_rescue	CGI_only
chrX-77425001-77426000	-32.0435	group_4	ENSG00000196468	FGF16	Distal Intergenic	full_rescue	NA
chrX-77412001-77413000	-54.8673	group_4	ENSG00000196468	FGF16	Distal Intergenic	full_rescue	NA
chrX-77305001-77306000	-43.0233	group_4	ENSG00000234404	SPRYD7P1	Distal Intergenic	full_rescue	NA
chrX-77286001-77287000	-43.4783	group_4	ENSG00000234404	SPRYD7P1	Distal Intergenic	full_rescue	NA
chrX-77253001-77254000	-51.5152	group_3	ENSG00000234404	SPRYD7P1	Distal Intergenic	full_rescue	NA
chrX-77213001-77214000	-37.5637	group_4	ENSG00000201447	RNA5SP509	Distal Intergenic	full_rescue	NA
chrX-77004001-77005000	-57.934	group_3	ENSG00000280870	MIR325HG	Intron (ENST00000658368/ENSG00000280870, intron 2 of 3)	full_rescue	NA
chrX-76999001-77000000	-92.3077	group_3	ENSG00000280870	MIR325HG	Intron (ENST00000658368/ENSG00000280870, intron 2 of 3)	full_rescue	NA
chrX-76978001-76979000	-64.25	group_3	ENSG00000280870	MIR325HG	Intron (ENST00000658368/ENSG00000280870, intron 2 of 3)	full_rescue	NA
chrX-76958001-76959000	-53.6585	group_3	ENSG00000280870	MIR325HG	Intron (ENST00000658368/ENSG00000280870, intron 2 of 3)	full_rescue	NA
chrX-76957001-76958000	-41.6667	group_4	ENSG00000280870	MIR325HG	Intron (ENST00000658368/ENSG00000280870, intron 2 of 3)	full_rescue	NA
chrX-76951001-76952000	-31.5308	group_4	ENSG00000280870	MIR325HG	Intron (ENST00000658368/ENSG00000280870, intron 2 of 3)	full_rescue	NA
chrX-76896001-76897000	-38	group_4	ENSG00000280870	MIR325HG	Intron (ENST00000658368/ENSG00000280870, intron 2 of 3)	full_rescue	NA
chrX-76880001-76881000	-45.7143	group_4	ENSG00000280870	MIR325HG	Intron (ENST00000658368/ENSG00000280870, intron 2 of 3)	full_rescue	NA
chrX-76840001-76841000	-40.0058	group_3	ENSG00000280870	MIR325HG	Intron (ENST00000658368/ENSG00000280870, intron 2 of 3)	full_rescue	NA
chrX-76810001-76811000	-85.7143	group_3	ENSG00000280870	MIR325HG	Intron (ENST00000658368/ENSG00000280870, intron 2 of 3)	full_rescue	NA
chrX-76741001-76742000	-86.2069	group_3	ENSG00000280870	MIR325HG	Intron (ENST00000658368/ENSG00000280870, intron 2 of 3)	partial_rescue	NA
chrX-76737001-76738000	-38.3333	group_4	ENSG00000280870	MIR325HG	Intron (ENST00000658368/ENSG00000280870, intron 2 of 3)	full_rescue	NA
chrX-76675001-76676000	-32.2876	group_4	ENSG00000280870	MIR325HG	Intron (ENST00000658368/ENSG00000280870, intron 2 of 3)	full_rescue	NA
chrX-76674001-76675000	-27.7778	group_4	ENSG00000280870	MIR325HG	Intron (ENST00000658368/ENSG00000280870, intron 2 of 3)	partial_rescue	NA
chrX-76417001-76418000	-56.6234	group_3	ENSG00000198934	MAGEE1	Distal Intergenic	full_rescue	NA
chrX-76396001-76397000	-72.2222	group_2	ENSG00000198934	MAGEE1	Distal Intergenic	full_rescue	NA
chrX-76380001-76381000	-57.669	group_2	ENSG00000213684	LDHBP2	Distal Intergenic	full_rescue	NA
chrX-76288001-76289000	-65.5271	group_4	ENSG00000274398	RP11-322A17.3	Distal Intergenic	full_rescue	NA
chrX-76195001-76196000	-31.3971	group_4	ENSG00000102390	PBDC1	Distal Intergenic	full_rescue	NA
chrX-76126001-76127000	-58.658	group_3	ENSG00000102390	PBDC1	Distal Intergenic	full_rescue	NA
chrX-75920001-75921000	-28.5448	group_4	ENSG00000226854	RP11-212D3.4	Distal Intergenic	full_rescue	NA
chrX-75908001-75909000	-43.3419	group_4	ENSG00000226854	RP11-212D3.4	Distal Intergenic	partial_rescue	NA
chrX-75901001-75902000	-50.7353	group_3	ENSG00000226854	RP11-212D3.4	Promoter (1-2kb)	full_rescue	NA
chrX-75900001-75901000	-49.2823	group_4	ENSG00000226854	RP11-212D3.4	Distal Intergenic	full_rescue	NA
chrX-75858001-75859000	-44.8933	group_4	ENSG00000233063	SAR1AP4	Distal Intergenic	full_rescue	NA
chrX-75857001-75858000	-45.1551	group_4	ENSG00000233063	SAR1AP4	Distal Intergenic	full_rescue	NA
chrX-75850001-75851000	-48.9736	group_4	ENSG00000233063	SAR1AP4	Distal Intergenic	full_rescue	NA
chrX-75803001-75804000	-48.19	group_4	ENSG00000186675	MAGEE2	Distal Intergenic	full_rescue	NA
chrX-75785001-75786000	-62.9366	group_2	ENSG00000186675	MAGEE2	Promoter (<=1kb)	partial_rescue	NA
chrX-75784001-75785000	-57.7922	group_3	ENSG00000186675	MAGEE2	Promoter (<=1kb)	no_rescue	NA
chrX-75758001-75759000	-27.6596	group_4	ENSG00000215105	TTC3P1	Distal Intergenic	full_rescue	NA
chrX-75752001-75753000	-56.6667	group_3	ENSG00000215105	TTC3P1	Distal Intergenic	full_rescue	NA
chrX-75694001-75695000	-27.1014	group_4	ENSG00000215105	TTC3P1	Distal Intergenic	full_rescue	NA
chrX-75685001-75686000	-30.861	group_4	ENSG00000215105	TTC3P1	Distal Intergenic	full_rescue	NA
chrX-75657001-75658000	-45.7143	group_3	ENSG00000224775	BRAFP1	Distal Intergenic	partial_rescue	NA
chrX-75652001-75653000	-43.8795	group_2	ENSG00000224775	BRAFP1	Distal Intergenic	partial_rescue	NA
chrX-75635001-75636000	-54.2962	group_3	ENSG00000224775	BRAFP1	Distal Intergenic	full_rescue	NA
chrX-75632001-75633000	-25.4304	group_4	ENSG00000224775	BRAFP1	Distal Intergenic	partial_rescue	NA
chrX-75631001-75632000	-39.4231	group_4	ENSG00000224775	BRAFP1	Distal Intergenic	full_rescue	NA
chrX-75619001-75620000	-66.9872	group_3	ENSG00000224775	BRAFP1	Distal Intergenic	full_rescue	NA
chrX-75598001-75599000	-47.0588	group_4	ENSG00000224775	BRAFP1	Distal Intergenic	full_rescue	NA
chrX-75587001-75588000	-60	group_3	ENSG00000224775	BRAFP1	Distal Intergenic	full_rescue	NA
chrX-75586001-75587000	-41.8011	group_4	ENSG00000224775	BRAFP1	Distal Intergenic	full_rescue	NA
chrX-75569001-75570000	-25.7426	group_4	ENSG00000224775	BRAFP1	Distal Intergenic	full_rescue	NA
chrX-75544001-75545000	-38.8889	group_4	ENSG00000237089	PCNPP4	Distal Intergenic	partial_rescue	NA
chrX-7554001-7555000	-36.3636	group_4	ENSG00000101846	STS	Intron (ENST00000664306/ENSG00000101846, intron 10 of 12)	partial_rescue	NA
chrX-75521001-75522000	-40.1521	group_3	ENSG00000102383	ZDHHC15	Intron (ENST00000373367/ENSG00000102383, intron 1 of 11)	full_rescue	CGI_and_GH
chrX-75390001-75391000	-67.1429	group_3	ENSG00000102383	ZDHHC15	Intron (ENST00000373367/ENSG00000102383, intron 10 of 11)	partial_rescue	NA
chrX-75389001-75390000	-53.0049	group_3	ENSG00000102383	ZDHHC15	Intron (ENST00000373367/ENSG00000102383, intron 10 of 11)	full_rescue	NA
chrX-75347001-75348000	-34.3305	group_3	ENSG00000232186	RP11-311P8.2	Distal Intergenic	full_rescue	NA
chrX-75232001-75233000	-44.6129	group_1	ENSG00000094841	UPRT	Intron (ENST00000652605/ENSG00000094841, intron 4 of 13)	full_rescue	NA
chrX-75211001-75212000	-36.7549	group_4	ENSG00000094841	UPRT	Intron (ENST00000652605/ENSG00000094841, intron 4 of 13)	partial_rescue	NA
chrX-75208001-75209000	-49.5327	group_3	ENSG00000094841	UPRT	Intron (ENST00000652605/ENSG00000094841, intron 4 of 13)	full_rescue	NA
chrX-75206001-75207000	-49.2922	group_4	ENSG00000094841	UPRT	Intron (ENST00000652605/ENSG00000094841, intron 4 of 13)	full_rescue	NA
chrX-75192001-75193000	-59.5792	group_3	ENSG00000094841	UPRT	Intron (ENST00000652605/ENSG00000094841, intron 4 of 13)	partial_rescue	NA
chrX-75188001-75189000	-25.6596	group_3	ENSG00000094841	UPRT	Intron (ENST00000652605/ENSG00000094841, intron 4 of 13)	full_rescue	NA
chrX-75132001-75133000	-42.1053	group_4	ENSG00000131269	ABCB7	Intron (ENST00000253577/ENSG00000131269, intron 1 of 15)	full_rescue	NA
chrX-75039001-75040000	-27.9762	group_4	ENSG00000050030	KIAA2022	Distal Intergenic	partial_rescue	NA
chrX-74946001-74947000	-33.3333	group_4	ENSG00000050030	KIAA2022	Distal Intergenic	full_rescue	NA
chrX-74942001-74943000	-41.3793	group_4	ENSG00000050030	KIAA2022	Distal Intergenic	full_rescue	NA
chrX-74849001-74850000	-51.4706	group_3	ENSG00000050030	KIAA2022	Intron (ENST00000055682/ENSG00000050030, intron 1 of 3)	full_rescue	NA
chrX-74815001-74816000	-50	group_4	ENSG00000050030	KIAA2022	Intron (ENST00000055682/ENSG00000050030, intron 1 of 3)	full_rescue	NA
chrX-74802001-74803000	-34.4597	group_4	ENSG00000050030	KIAA2022	Intron (ENST00000055682/ENSG00000050030, intron 1 of 3)	full_rescue	NA
chrX-74778001-74779000	-43.1818	group_4	ENSG00000050030	KIAA2022	Intron (ENST00000055682/ENSG00000050030, intron 1 of 3)	partial_rescue	NA
chrX-74767001-74768000	-30.8036	group_4	ENSG00000050030	KIAA2022	Intron (ENST00000055682/ENSG00000050030, intron 1 of 3)	full_rescue	NA
chrX-74745001-74746000	-51.6129	group_4	ENSG00000050030	KIAA2022	5' UTR	partial_rescue	NA
chrX-74743001-74744000	-34.7436	group_4	ENSG00000050030	KIAA2022	Exon (ENST00000055682/ENSG00000050030, exon 3 of 4)	full_rescue	NA
chrX-74704001-74705000	-45.4545	group_4	ENSG00000199885	RNU6-330P	Distal Intergenic	full_rescue	NA
chrX-74592001-74593000	-34.5669	group_4	ENSG00000131263	RLIM	Exon (ENST00000332687/ENSG00000131263, exon 4 of 4)	full_rescue	NA
chrX-74539001-74540000	-35.7143	group_4	ENSG00000230673	PABPC1P3	Distal Intergenic	full_rescue	NA
chrX-74524001-74525000	-40	group_4	ENSG00000147100	SLC16A2	3' UTR	full_rescue	NA
chrX-74462001-74463000	-70.9527	group_3	ENSG00000147100	SLC16A2	Intron (ENST00000587091/ENSG00000147100, intron 1 of 5)	full_rescue	NA
chrX-74456001-74457000	-43.619	group_4	ENSG00000147100	SLC16A2	Intron (ENST00000587091/ENSG00000147100, intron 1 of 5)	full_rescue	NA
chrX-74455001-74456000	-49.4872	group_4	ENSG00000147100	SLC16A2	Intron (ENST00000587091/ENSG00000147100, intron 1 of 5)	full_rescue	GH_only
chrX-74453001-74454000	-36.4848	group_4	ENSG00000147100	SLC16A2	Intron (ENST00000587091/ENSG00000147100, intron 1 of 5)	full_rescue	GH_only
chrX-74437001-74438000	-61.6667	group_3	ENSG00000147100	SLC16A2	Intron (ENST00000587091/ENSG00000147100, intron 1 of 5)	full_rescue	NA
chrX-74417001-74418000	-45.122	group_4	ENSG00000147100	SLC16A2	Distal Intergenic	full_rescue	NA
chrX-74394001-74395000	-36.3636	group_4	ENSG00000239745	RN7SL790P	Downstream (1-2kb)	partial_rescue	NA
chrX-74182001-74183000	-28.5714	group_4	ENSG00000230590	FTX	Intron (ENST00000603672/ENSG00000230590, intron 5 of 5)	full_rescue	NA
chrX-74178001-74179000	-25.8749	group_2	ENSG00000230590	FTX	Intron (ENST00000603672/ENSG00000230590, intron 5 of 5)	full_rescue	NA
chrX-74147001-74148000	-59.8673	group_3	ENSG00000230590	FTX	Intron (ENST00000603672/ENSG00000230590, intron 5 of 5)	full_rescue	NA
chrX-74122001-74123000	-32.5301	group_4	ENSG00000280375	RP13-204A15.5	Promoter (<=1kb)	full_rescue	NA
chrX-74086001-74087000	-32.9281	group_4	ENSG00000230590	FTX	Intron (ENST00000603672/ENSG00000230590, intron 5 of 5)	full_rescue	NA
chrX-73768001-73769000	-35.4268	group_3	ENSG00000230146	SEPHS1P4	Promoter (<=1kb)	full_rescue	NA
chrX-73448001-73449000	-56.2013	group_2	ENSG00000131264	CDX4	Promoter (<=1kb)	full_rescue	CGI_only
chrX-73405001-73406000	-47.5556	group_4	ENSG00000207486	RNU6-1044P	Distal Intergenic	full_rescue	NA
chrX-73330001-73331000	-66.0131	group_3	ENSG00000225664	YWHAZP8	Distal Intergenic	full_rescue	NA
chrX-73259001-73260000	-34.0336	group_4	ENSG00000225664	YWHAZP8	Distal Intergenic	partial_rescue	NA
chrX-73186001-73187000	-44.3051	group_4	ENSG00000186462	NAP1L2	Distal Intergenic	full_rescue	NA
chrX-73182001-73183000	-30.3571	group_3	ENSG00000186462	NAP1L2	Distal Intergenic	no_rescue	NA
chrX-73159001-73160000	-65.8559	group_3	ENSG00000204118	NAP1L6	Distal Intergenic	full_rescue	NA
chrX-73158001-73159000	-26.6667	group_4	ENSG00000204118	NAP1L6	Distal Intergenic	full_rescue	NA
chrX-73116001-73117000	-81.25	group_3	ENSG00000204118	NAP1L6	Distal Intergenic	full_rescue	NA
chrX-731001-732000	-28.5963	group_3	ENSG00000185960	SHOX	Distal Intergenic	partial_rescue	NA
chrX-73070001-73071000	-29.1667	group_4	ENSG00000186288	PABPC1L2A	Distal Intergenic	full_rescue	NA
chrX-73060001-73061000	-30.1309	group_4	ENSG00000186288	PABPC1L2A	Distal Intergenic	full_rescue	NA
chrX-73053001-73054000	-47.9167	group_4	ENSG00000186288	PABPC1L2A	Distal Intergenic	full_rescue	NA
chrX-73052001-73053000	-33.5498	group_3	ENSG00000186288	PABPC1L2A	Distal Intergenic	full_rescue	NA
chrX-73021001-73022000	-33.917	group_4	ENSG00000184388	PABPC1L2B	Distal Intergenic	no_rescue	NA
chrX-72840001-72841000	-43.1947	group_4	ENSG00000184911	DMRTC1B	Intron (ENST00000472595/ENSG00000184911, intron 1 of 5)	full_rescue	NA
chrX-72738001-72739000	-30.2388	group_4	ENSG00000201271	RNU1-112P	Downstream (1-2kb)	full_rescue	NA
chrX-72734001-72735000	-46.6939	group_3	ENSG00000213698	RP1-172N19.4	Distal Intergenic	partial_rescue	NA
chrX-72733001-72734000	-62.451	group_3	ENSG00000213698	RP1-172N19.4	Distal Intergenic	partial_rescue	NA
chrX-72730001-72731000	-27.1978	group_4	ENSG00000213698	RP1-172N19.4	Promoter (1-2kb)	full_rescue	NA
chrX-72715001-72716000	-30.9533	group_4	ENSG00000067177	PHKA1	Promoter (<=1kb)	full_rescue	CGI_only
chrX-72670001-72671000	-27.0971	group_4	ENSG00000067177	PHKA1	Intron (ENST00000373542/ENSG00000067177, intron 6 of 31)	full_rescue	NA
chrX-72607001-72608000	-46.2937	group_4	ENSG00000067177	PHKA1	Intron (ENST00000373542/ENSG00000067177, intron 23 of 31)	full_rescue	NA
chrX-72541001-72542000	-33.5714	group_3	ENSG00000285547	NA	Intron (ENST00000647613/ENSG00000285547, intron 5 of 11)	full_rescue	NA
chrX-72528001-72529000	-38.0952	group_4	ENSG00000285547	NA	Intron (ENST00000647613/ENSG00000285547, intron 5 of 11)	no_rescue	NA
chrX-72516001-72517000	-32.73	group_4	ENSG00000285547	NA	Intron (ENST00000647613/ENSG00000285547, intron 5 of 11)	full_rescue	NA
chrX-72479001-72480000	-52.461	group_4	ENSG00000285547	NA	Intron (ENST00000647613/ENSG00000285547, intron 7 of 11)	full_rescue	NA
chrX-72432001-72433000	-58.6207	group_3	ENSG00000285547	NA	Intron (ENST00000647613/ENSG00000285547, intron 9 of 11)	partial_rescue	NA
chrX-72411001-72412000	-28.9474	group_4	ENSG00000285547	NA	Intron (ENST00000647613/ENSG00000285547, intron 9 of 11)	partial_rescue	NA
chrX-72408001-72409000	-37.6446	group_4	ENSG00000285547	NA	Intron (ENST00000647613/ENSG00000285547, intron 9 of 11)	full_rescue	NA
chrX-72358001-72359000	-28.9855	group_4	ENSG00000285547	NA	Intron (ENST00000647613/ENSG00000285547, intron 9 of 11)	full_rescue	NA
chrX-72349001-72350000	-31.9149	group_4	ENSG00000285547	NA	3' UTR	full_rescue	NA
chrX-72337001-72338000	-42.6404	group_3	ENSG00000285547	NA	Intron (ENST00000647613/ENSG00000285547, intron 10 of 11)	full_rescue	NA
chrX-72317001-72318000	-38.2353	group_3	ENSG00000285547	NA	Intron (ENST00000647613/ENSG00000285547, intron 10 of 11)	full_rescue	NA
chrX-72314001-72315000	-39.2189	group_3	ENSG00000285547	NA	Intron (ENST00000647613/ENSG00000285547, intron 10 of 11)	partial_rescue	NA
chrX-72312001-72313000	-32.2956	group_3	ENSG00000285547	NA	Intron (ENST00000647613/ENSG00000285547, intron 10 of 11)	full_rescue	NA
chrX-72295001-72296000	-61.1111	group_3	ENSG00000102309	PIN4	Intron (ENST00000439980/ENSG00000102309, intron 3 of 5)	full_rescue	NA
chrX-72280001-72281000	-38.84	group_4	ENSG00000102309	PIN4	Intron (ENST00000439980/ENSG00000102309, intron 3 of 5)	full_rescue	GH_only
chrX-72225001-72226000	-26.936	group_4	ENSG00000102309	PIN4	Intron (ENST00000423432/ENSG00000102309, intron 3 of 3)	full_rescue	NA
chrX-72184001-72185000	-41.2516	group_4	ENSG00000102309	PIN4	Intron (ENST00000373662/ENSG00000102309, intron 1 of 2)	full_rescue	GH_only
chrX-72173001-72174000	-30.122	group_4	ENSG00000102309	PIN4	Distal Intergenic	full_rescue	NA
chrX-72159001-72160000	-50	group_4	ENSG00000225471	RP11-262D11.2	Promoter (<=1kb)	full_rescue	NA
chrX-72151001-72152000	-68.75	group_3	ENSG00000204131	NHSL2	3' UTR	partial_rescue	NA
chrX-72133001-72134000	-44.6779	group_4	ENSG00000204131	NHSL2	Exon (ENST00000373677/ENSG00000204131, exon 1 of 2)	full_rescue	CGI_only
chrX-72132001-72133000	-50.1196	group_2	ENSG00000204131	NHSL2	Exon (ENST00000633930/ENSG00000204131, exon 2 of 8)	full_rescue	CGI_only
chrX-72124001-72125000	-31.0268	group_3	ENSG00000204131	NHSL2	Intron (ENST00000633930/ENSG00000204131, intron 1 of 7)	full_rescue	GH_only
chrX-72114001-72115000	-41.1232	group_4	ENSG00000204131	NHSL2	Intron (ENST00000633930/ENSG00000204131, intron 1 of 7)	full_rescue	GH_only
chrX-72112001-72113000	-70	group_3	ENSG00000204131	NHSL2	Intron (ENST00000633930/ENSG00000204131, intron 1 of 7)	partial_rescue	GH_only
chrX-72101001-72102000	-43.6559	group_2	ENSG00000204131	NHSL2	Intron (ENST00000633930/ENSG00000204131, intron 1 of 7)	full_rescue	GH_only
chrX-72080001-72081000	-35.7371	group_4	ENSG00000204131	NHSL2	5' UTR	full_rescue	GH_only
chrX-72061001-72062000	-38.2817	group_4	ENSG00000204131	NHSL2	Intron (ENST00000633930/ENSG00000204131, intron 1 of 7)	partial_rescue	NA
chrX-72059001-72060000	-55.0225	group_3	ENSG00000204131	NHSL2	Intron (ENST00000633930/ENSG00000204131, intron 1 of 7)	partial_rescue	NA
chrX-72058001-72059000	-28.1481	group_4	ENSG00000204131	NHSL2	Intron (ENST00000633930/ENSG00000204131, intron 1 of 7)	full_rescue	NA
chrX-72056001-72057000	-47.0588	group_4	ENSG00000204131	NHSL2	Intron (ENST00000633930/ENSG00000204131, intron 1 of 7)	full_rescue	NA
chrX-72051001-72052000	-38.8235	group_4	ENSG00000204131	NHSL2	Intron (ENST00000633930/ENSG00000204131, intron 1 of 7)	partial_rescue	NA
chrX-72048001-72049000	-45.7627	group_4	ENSG00000204131	NHSL2	Intron (ENST00000633930/ENSG00000204131, intron 1 of 7)	full_rescue	GH_only
chrX-72023001-72024000	-52.5	group_4	ENSG00000204131	NHSL2	Intron (ENST00000633930/ENSG00000204131, intron 1 of 7)	full_rescue	GH_only
chrX-72008001-72009000	-38.3142	group_4	ENSG00000204131	NHSL2	Intron (ENST00000633930/ENSG00000204131, intron 1 of 7)	full_rescue	NA
chrX-72007001-72008000	-33.7169	group_3	ENSG00000204131	NHSL2	Intron (ENST00000633930/ENSG00000204131, intron 1 of 7)	full_rescue	NA
chrX-71990001-71991000	-41.3434	group_3	ENSG00000204131	NHSL2	Intron (ENST00000633930/ENSG00000204131, intron 1 of 7)	full_rescue	NA
chrX-71959001-71960000	-68.239	group_3	ENSG00000204131	NHSL2	Intron (ENST00000633930/ENSG00000204131, intron 1 of 7)	full_rescue	NA
chrX-71953001-71954000	-81.25	group_3	ENSG00000204131	NHSL2	Intron (ENST00000633930/ENSG00000204131, intron 1 of 7)	full_rescue	NA
chrX-71947001-71948000	-30.1561	group_4	ENSG00000204131	NHSL2	Intron (ENST00000633930/ENSG00000204131, intron 1 of 7)	full_rescue	NA
chrX-71945001-71946000	-53.8462	group_4	ENSG00000204131	NHSL2	Intron (ENST00000633930/ENSG00000204131, intron 1 of 7)	full_rescue	NA
chrX-71875001-71876000	-42.7035	group_3	ENSG00000283178	AL590763.16	Promoter (1-2kb)	full_rescue	CGI_only
chrX-71869001-71870000	-30.5556	group_4	ENSG00000283178	AL590763.16	Exon (ENST00000636596/ENSG00000283178, exon 5 of 5)	full_rescue	NA
chrX-71864001-71865000	-30.8929	group_4	ENSG00000283178	AL590763.16	Distal Intergenic	partial_rescue	NA
chrX-71862001-71863000	-31.9745	group_4	ENSG00000283178	AL590763.16	Distal Intergenic	full_rescue	NA
chrX-71843001-71844000	-43.1094	group_3	ENSG00000229030	RP11-402P6.6	Distal Intergenic	full_rescue	NA
chrX-71830001-71831000	-28.3422	group_2	ENSG00000229030	RP11-402P6.6	Distal Intergenic	full_rescue	NA
chrX-71823001-71824000	-47.3783	group_3	ENSG00000229030	RP11-402P6.6	Distal Intergenic	full_rescue	NA
chrX-71816001-71817000	-43.5484	group_4	ENSG00000224617	RP11-402P6.5	Distal Intergenic	full_rescue	NA
chrX-71814001-71815000	-27.598	group_4	ENSG00000224617	RP11-402P6.5	Distal Intergenic	full_rescue	NA
chrX-71662001-71663000	-27.9779	group_4	ENSG00000237265	RP11-402P6.9	Exon (ENST00000433410/ENSG00000237265, exon 3 of 3)	full_rescue	NA
chrX-71644001-71645000	-31.2152	group_4	ENSG00000237265	RP11-402P6.9	Distal Intergenic	full_rescue	NA
chrX-71621001-71622000	-40.9962	group_4	ENSG00000186810	CXCR3	Distal Intergenic	full_rescue	GH_only
chrX-71615001-71616000	-32.381	group_4	ENSG00000186810	CXCR3	3' UTR	full_rescue	GH_only
chrX-71611001-71612000	-27.7098	group_4	ENSG00000147174	ACRC	Intron (ENST00000373696/ENSG00000147174, intron 11 of 12)	full_rescue	NA
chrX-71586001-71587000	-67.9027	group_3	ENSG00000147174	ACRC	Intron (ENST00000373696/ENSG00000147174, intron 2 of 12)	full_rescue	NA
chrX-71561001-71562000	-28.815	group_4	ENSG00000147162	OGT	Exon (ENST00000488174/ENSG00000147162, exon 13 of 20)	full_rescue	NA
chrX-71528001-71529000	-35.6044	group_2	ENSG00000147133	TAF1	3' UTR	no_rescue	GH_only
chrX-71514001-71515000	-42.9379	group_3	ENSG00000147133	TAF1	Intron (ENST00000373775/ENSG00000147133, intron 13 of 14)	full_rescue	NA
chrX-71513001-71514000	-42.8454	group_3	ENSG00000147133	TAF1	Intron (ENST00000373775/ENSG00000147133, intron 13 of 14)	full_rescue	NA
chrX-71483001-71484000	-53.3333	group_4	ENSG00000147133	TAF1	Intron (ENST00000373775/ENSG00000147133, intron 13 of 14)	full_rescue	NA
chrX-71463001-71464000	-29.4986	group_4	ENSG00000147133	TAF1	Exon (ENST00000373790/ENSG00000147133, exon 38 of 38)	full_rescue	NA
chrX-71460001-71461000	-30.9957	group_4	ENSG00000147133	TAF1	Exon (ENST00000373790/ENSG00000147133, exon 37 of 38)	full_rescue	NA
chrX-71410001-71411000	-36.9697	group_4	ENSG00000147133	TAF1	Intron (ENST00000373790/ENSG00000147133, intron 28 of 37)	full_rescue	NA
chrX-71402001-71403000	-28.5714	group_4	ENSG00000147133	TAF1	Intron (ENST00000373790/ENSG00000147133, intron 25 of 37)	partial_rescue	NA
chrX-71395001-71396000	-54.6875	group_4	ENSG00000147133	TAF1	Intron (ENST00000373790/ENSG00000147133, intron 22 of 37)	full_rescue	NA
chrX-71382001-71383000	-32.8656	group_4	ENSG00000147133	TAF1	Exon (ENST00000373790/ENSG00000147133, exon 10 of 38)	full_rescue	NA
chrX-71348001-71349000	-54.8575	group_4	ENSG00000213706	AL590762.7	Distal Intergenic	full_rescue	NA
chrX-71347001-71348000	-26.6304	group_4	ENSG00000213706	AL590762.7	Distal Intergenic	full_rescue	NA
chrX-71300001-71301000	-38.75	group_4	ENSG00000147140	NONO	3' UTR	full_rescue	NA
chrX-71294001-71295000	-25.8588	group_4	ENSG00000147140	NONO	3' UTR	full_rescue	NA
chrX-71287001-71288000	-44.4444	group_4	ENSG00000147140	NONO	Intron (ENST00000677446/ENSG00000147140, intron 3 of 12)	full_rescue	GH_only
chrX-71271001-71272000	-42.5	group_4	ENSG00000147140	NONO	Intron (ENST00000677446/ENSG00000147140, intron 1 of 12)	full_rescue	NA
chrX-71252001-71253000	-44.9751	group_3	ENSG00000147130	ZMYM3	Exon (ENST00000314425/ENSG00000147130, exon 2 of 25)	full_rescue	CGI_and_GH
chrX-71246001-71247000	-85.7143	group_3	ENSG00000147130	ZMYM3	Exon (ENST00000314425/ENSG00000147130, exon 14 of 25)	full_rescue	NA
chrX-71217001-71218000	-27.5268	group_4	ENSG00000169562	GJB1	5' UTR	full_rescue	NA
chrX-71196001-71197000	-38.7691	group_2	ENSG00000228427	RP5-1091N2.9	Intron (ENST00000664514/ENSG00000228427, intron 1 of 1)	full_rescue	NA
chrX-71190001-71191000	-30.0733	group_4	ENSG00000228427	RP5-1091N2.9	Intron (ENST00000664514/ENSG00000228427, intron 1 of 1)	full_rescue	NA
chrX-71167001-71168000	-46	group_4	ENSG00000196338	NLGN3	Exon (ENST00000536169/ENSG00000196338, exon 5 of 6)	partial_rescue	CGI_only
chrX-71153001-71154000	-26.83	group_4	ENSG00000196338	NLGN3	Exon (ENST00000358741/ENSG00000196338, exon 4 of 8)	full_rescue	GH_only
chrX-71147001-71148000	-37.8049	group_3	ENSG00000196338	NLGN3	5' UTR	full_rescue	GH_only
chrX-71126001-71127000	-25.3089	group_4	ENSG00000184634	MED12	Exon (ENST00000333646/ENSG00000184634, exon 18 of 45)	full_rescue	NA
chrX-71125001-71126000	-35.0139	group_4	ENSG00000184634	MED12	Exon (ENST00000333646/ENSG00000184634, exon 15 of 45)	full_rescue	NA
chrX-71123001-71124000	-30.3797	group_4	ENSG00000184634	MED12	Exon (ENST00000333646/ENSG00000184634, exon 11 of 45)	no_rescue	GH_only
chrX-71122001-71123000	-38.3333	group_4	ENSG00000184634	MED12	Exon (ENST00000333646/ENSG00000184634, exon 8 of 45)	partial_rescue	GH_only
chrX-71107001-71108000	-28.2403	group_4	ENSG00000285171	NA	3' UTR	full_rescue	GH_only
chrX-71100001-71101000	-54.5918	group_3	ENSG00000184481	FOXO4	Exon (ENST00000374259/ENSG00000184481, exon 2 of 3)	full_rescue	GH_only
chrX-71038001-71039000	-29.0466	group_4	ENSG00000227536	SOCS5P4	Distal Intergenic	full_rescue	NA
chrX-71026001-71027000	-44.302	group_4	ENSG00000212605	RNU1-56P	Distal Intergenic	full_rescue	NA
chrX-71000001-71001000	-33.0632	group_3	ENSG00000229324	NUTF2P7	Distal Intergenic	full_rescue	NA
chrX-70999001-71000000	-43.4066	group_3	ENSG00000229324	NUTF2P7	Distal Intergenic	full_rescue	NA
chrX-70989001-70990000	-28.3784	group_4	ENSG00000230629	RPS23P8	Distal Intergenic	full_rescue	NA
chrX-70979001-70980000	-31.0045	group_1	ENSG00000230629	RPS23P8	Distal Intergenic	full_rescue	NA
chrX-70944001-70945000	-50	group_4	ENSG00000165349	SLC7A3	Distal Intergenic	full_rescue	NA
chrX-70928001-70929000	-42.5398	group_3	ENSG00000165349	SLC7A3	Exon (ENST00000374299/ENSG00000165349, exon 3 of 12)	no_rescue	CGI_only
chrX-70922001-70923000	-57.1429	group_1	ENSG00000165349	SLC7A3	Downstream (2-3kb)	full_rescue	NA
chrX-70871001-70872000	-43.1111	group_3	ENSG00000120498	TEX11	Intron (ENST00000374333/ENSG00000120498, intron 4 of 29)	full_rescue	NA
chrX-70795001-70796000	-28.5088	group_4	ENSG00000120498	TEX11	Intron (ENST00000374333/ENSG00000120498, intron 9 of 29)	partial_rescue	NA
chrX-70756001-70757000	-36.1296	group_2	ENSG00000120498	TEX11	Intron (ENST00000374333/ENSG00000120498, intron 9 of 29)	full_rescue	NA
chrX-70635001-70636000	-31.9316	group_4	ENSG00000120498	TEX11	Intron (ENST00000374333/ENSG00000120498, intron 17 of 29)	full_rescue	NA
chrX-70618001-70619000	-56.0847	group_2	ENSG00000120498	TEX11	Intron (ENST00000374333/ENSG00000120498, intron 20 of 29)	partial_rescue	NA
chrX-70528001-70529000	-38.9047	group_4	ENSG00000120498	TEX11	3' UTR	full_rescue	NA
chrX-70505001-70506000	-57.381	group_3	ENSG00000082458	DLG3	3' UTR	full_rescue	NA
chrX-70504001-70505000	-36.425	group_4	ENSG00000082458	DLG3	3' UTR	full_rescue	NA
chrX-70498001-70499000	-40.3226	group_4	ENSG00000082458	DLG3	Exon (ENST00000374360/ENSG00000082458, exon 14 of 19)	partial_rescue	NA
chrX-70496001-70497000	-69.5652	group_3	ENSG00000082458	DLG3	Intron (ENST00000374360/ENSG00000082458, intron 13 of 18)	partial_rescue	NA
chrX-70492001-70493000	-32.9609	group_4	ENSG00000082458	DLG3	Exon (ENST00000374360/ENSG00000082458, exon 11 of 19)	no_rescue	NA
chrX-70438001-70439000	-36.1765	group_4	ENSG00000284391	NA	Distal Intergenic	partial_rescue	NA
chrX-70435001-70436000	-27.1806	group_2	ENSG00000284391	NA	Promoter (<=1kb)	full_rescue	CGI_only
chrX-70431001-70432000	-30.2326	group_4	ENSG00000130055	GDPD2	Exon (ENST00000453994/ENSG00000130055, exon 13 of 17)	partial_rescue	CGI_only
chrX-70429001-70430000	-47.6819	group_4	ENSG00000130055	GDPD2	Exon (ENST00000453994/ENSG00000130055, exon 11 of 17)	partial_rescue	NA
chrX-70408001-70409000	-28.9474	group_4	ENSG00000090889	KIF4A	Intron (ENST00000374403/ENSG00000090889, intron 28 of 30)	partial_rescue	NA
chrX-70361001-70362000	-28.5714	group_4	ENSG00000090889	KIF4A	Exon (ENST00000412817/ENSG00000231053, exon 2 of 2)	full_rescue	NA
chrX-70360001-70361000	-44	group_4	ENSG00000090889	KIF4A	Intron (ENST00000374403/ENSG00000090889, intron 15 of 30)	full_rescue	NA
chrX-70357001-70358000	-52.1645	group_4	ENSG00000090889	KIF4A	Intron (ENST00000374403/ENSG00000090889, intron 15 of 30)	full_rescue	NA
chrX-70348001-70349000	-77.7778	group_4	ENSG00000090889	KIF4A	Intron (ENST00000374403/ENSG00000090889, intron 13 of 30)	full_rescue	NA
chrX-70314001-70315000	-34.127	group_4	ENSG00000090889	KIF4A	Intron (ENST00000374403/ENSG00000090889, intron 7 of 30)	full_rescue	NA
chrX-70253001-70254000	-39.2212	group_4	ENSG00000200473	RNA5SP507	Promoter (<=1kb)	full_rescue	NA
chrX-70243001-70244000	-62.1212	group_3	ENSG00000204195	AWAT1	Distal Intergenic	full_rescue	NA
chrX-70199001-70200000	-40.8844	group_2	ENSG00000184210	DGAT2L6	Exon (ENST00000333026/ENSG00000184210, exon 2 of 7)	full_rescue	NA
chrX-70139001-70140000	-30.4422	group_4	ENSG00000089289	IGBP1	Intron (ENST00000356413/ENSG00000089289, intron 3 of 6)	full_rescue	NA
chrX-70135001-70136000	-34.4769	group_4	ENSG00000089289	IGBP1	Intron (ENST00000356413/ENSG00000089289, intron 3 of 6)	full_rescue	CGI_only
chrX-70120001-70121000	-37.931	group_4	ENSG00000226579	MTCYBP31	Promoter (<=1kb)	full_rescue	NA
chrX-70091001-70092000	-32.7303	group_4	ENSG00000189401	OTUD6A	Distal Intergenic	full_rescue	NA
chrX-70067001-70068000	-27.0062	group_4	ENSG00000189401	OTUD6A	Distal Intergenic	full_rescue	NA
chrX-70044001-70045000	-35.2357	group_4	ENSG00000147160	AWAT2	Exon (ENST00000276101/ENSG00000147160, exon 2 of 8)	full_rescue	NA
chrX-70034001-70035000	-26.7461	group_3	ENSG00000158813	EDA	Intron (ENST00000374553/ENSG00000158813, intron 7 of 7)	full_rescue	NA
chrX-70026001-70027000	-41.1372	group_3	ENSG00000158813	EDA	Intron (ENST00000374553/ENSG00000158813, intron 3 of 7)	full_rescue	NA
chrX-69944001-69945000	-38.3333	group_4	ENSG00000158813	EDA	Intron (ENST00000533317/ENSG00000158813, intron 3 of 3)	partial_rescue	NA
chrX-69886001-69887000	-40.7484	group_3	ENSG00000158813	EDA	Intron (ENST00000533317/ENSG00000158813, intron 3 of 3)	full_rescue	NA
chrX-69836001-69837000	-46.1538	group_4	ENSG00000158813	EDA	Intron (ENST00000525810/ENSG00000158813, intron 1 of 1)	full_rescue	NA
chrX-69747001-69748000	-25.5907	group_3	ENSG00000158813	EDA	Intron (ENST00000525810/ENSG00000158813, intron 1 of 1)	full_rescue	NA
chrX-69711001-69712000	-36.9213	group_4	ENSG00000158813	EDA	Intron (ENST00000525810/ENSG00000158813, intron 1 of 1)	full_rescue	NA
chrX-69635001-69636000	-39.5227	group_4	ENSG00000158813	EDA	Intron (ENST00000525810/ENSG00000158813, intron 1 of 1)	full_rescue	NA
chrX-69597001-69598000	-62.5	group_4	ENSG00000158813	EDA	Distal Intergenic	full_rescue	NA
chrX-69556001-69557000	-26.5208	group_2	ENSG00000228160	RP13-57D9.3	Distal Intergenic	full_rescue	NA
chrX-69539001-69540000	-39.1689	group_3	ENSG00000130054	FAM155B	Distal Intergenic	full_rescue	CGI_only
chrX-69535001-69536000	-28.4013	group_3	ENSG00000130054	FAM155B	Distal Intergenic	full_rescue	NA
chrX-69531001-69532000	-34.8968	group_3	ENSG00000130054	FAM155B	3' UTR	full_rescue	NA
chrX-69530001-69531000	-49.0196	group_3	ENSG00000130054	FAM155B	3' UTR	no_rescue	NA
chrX-69526001-69527000	-40.4777	group_4	ENSG00000130054	FAM155B	Intron (ENST00000252338/ENSG00000130054, intron 1 of 2)	full_rescue	NA
chrX-69523001-69524000	-61.1111	group_3	ENSG00000130054	FAM155B	Intron (ENST00000252338/ENSG00000130054, intron 1 of 2)	full_rescue	NA
chrX-69512001-69513000	-30.8902	group_2	ENSG00000130054	FAM155B	Intron (ENST00000252338/ENSG00000130054, intron 1 of 2)	full_rescue	NA
chrX-69507001-69508000	-58.2356	group_3	ENSG00000130054	FAM155B	Intron (ENST00000252338/ENSG00000130054, intron 1 of 2)	partial_rescue	CGI_and_GH
chrX-69485001-69486000	-52.316	group_4	ENSG00000231706	CYCSP43	Promoter (<=1kb)	full_rescue	NA
chrX-69407001-69408000	-58.4158	group_3	ENSG00000231706	CYCSP43	Distal Intergenic	no_rescue	NA
chrX-69406001-69407000	-48.1489	group_3	ENSG00000231706	CYCSP43	Distal Intergenic	full_rescue	NA
chrX-69394001-69395000	-30.8924	group_3	ENSG00000231706	CYCSP43	Distal Intergenic	full_rescue	NA
chrX-69389001-69390000	-36.9034	group_3	ENSG00000231706	CYCSP43	Distal Intergenic	full_rescue	NA
chrX-69386001-69387000	-29.0323	group_4	ENSG00000231706	CYCSP43	Distal Intergenic	full_rescue	NA
chrX-69384001-69385000	-31.25	group_4	ENSG00000231706	CYCSP43	Distal Intergenic	full_rescue	NA
chrX-69363001-69364000	-28.9395	group_3	ENSG00000231706	CYCSP43	Distal Intergenic	full_rescue	NA
chrX-69362001-69363000	-29.0504	group_3	ENSG00000231706	CYCSP43	Distal Intergenic	full_rescue	NA
chrX-69359001-69360000	-31.645	group_3	ENSG00000231706	CYCSP43	Distal Intergenic	full_rescue	NA
chrX-69324001-69325000	-78.125	group_3	ENSG00000215162	LINC00269	Distal Intergenic	full_rescue	NA
chrX-69320001-69321000	-34.2657	group_4	ENSG00000215162	LINC00269	Distal Intergenic	partial_rescue	NA
chrX-69302001-69303000	-25.8732	group_4	ENSG00000215162	LINC00269	Distal Intergenic	full_rescue	NA
chrX-69301001-69302000	-40.7051	group_4	ENSG00000215162	LINC00269	Distal Intergenic	full_rescue	NA
chrX-69289001-69290000	-29.5918	group_4	ENSG00000215162	LINC00269	Distal Intergenic	partial_rescue	NA
chrX-69281001-69282000	-40	group_4	ENSG00000215162	LINC00269	Distal Intergenic	no_rescue	NA
chrX-69255001-69256000	-36.3248	group_4	ENSG00000215162	LINC00269	Distal Intergenic	partial_rescue	NA
chrX-69254001-69255000	-37.0314	group_4	ENSG00000215162	LINC00269	Distal Intergenic	full_rescue	NA
chrX-69243001-69244000	-31.25	group_4	ENSG00000215162	LINC00269	Distal Intergenic	full_rescue	NA
chrX-69237001-69238000	-61.5385	group_3	ENSG00000215162	LINC00269	Distal Intergenic	partial_rescue	NA
chrX-69231001-69232000	-35.2941	group_4	ENSG00000215162	LINC00269	Distal Intergenic	full_rescue	NA
chrX-69229001-69230000	-40.4072	group_4	ENSG00000215162	LINC00269	Distal Intergenic	full_rescue	NA
chrX-69217001-69218000	-32.3077	group_4	ENSG00000215162	LINC00269	Distal Intergenic	full_rescue	NA
chrX-69209001-69210000	-27.7446	group_4	ENSG00000215162	LINC00269	Exon (ENST00000399711/ENSG00000215162, exon 5 of 5)	full_rescue	NA
chrX-69196001-69197000	-57.1429	group_4	ENSG00000215162	LINC00269	Intron (ENST00000399711/ENSG00000215162, intron 1 of 4)	full_rescue	NA
chrX-69193001-69194000	-45.283	group_4	ENSG00000215162	LINC00269	Intron (ENST00000399711/ENSG00000215162, intron 1 of 4)	no_rescue	NA
chrX-69183001-69184000	-38.8889	group_4	ENSG00000215162	LINC00269	Intron (ENST00000399711/ENSG00000215162, intron 1 of 4)	partial_rescue	NA
chrX-69126001-69127000	-30.1517	group_4	ENSG00000181191	PJA1	Distal Intergenic	full_rescue	CGI_only
chrX-69117001-69118000	-59.2622	group_3	ENSG00000181191	PJA1	Distal Intergenic	partial_rescue	NA
chrX-69114001-69115000	-27.3477	group_4	ENSG00000181191	PJA1	Distal Intergenic	full_rescue	NA
chrX-69111001-69112000	-25.1948	group_4	ENSG00000181191	PJA1	Distal Intergenic	full_rescue	NA
chrX-69092001-69093000	-61.2101	group_3	ENSG00000181191	PJA1	Distal Intergenic	no_rescue	NA
chrX-69090001-69091000	-33.6174	group_4	ENSG00000181191	PJA1	Distal Intergenic	full_rescue	NA
chrX-69085001-69086000	-36.9354	group_3	ENSG00000181191	PJA1	Distal Intergenic	full_rescue	NA
chrX-69082001-69083000	-55.492	group_3	ENSG00000181191	PJA1	Distal Intergenic	full_rescue	NA
chrX-69062001-69063000	-39.8924	group_3	ENSG00000181191	PJA1	Distal Intergenic	partial_rescue	NA
chrX-69052001-69053000	-41.4634	group_4	ENSG00000181191	PJA1	Distal Intergenic	partial_rescue	NA
chrX-69049001-69050000	-34.1667	group_4	ENSG00000181191	PJA1	Distal Intergenic	full_rescue	NA
chrX-69038001-69039000	-47.191	group_4	ENSG00000181191	PJA1	Distal Intergenic	full_rescue	NA
chrX-69035001-69036000	-48.2222	group_3	ENSG00000181191	PJA1	Distal Intergenic	full_rescue	NA
chrX-69034001-69035000	-27.242	group_4	ENSG00000181191	PJA1	Distal Intergenic	full_rescue	NA
chrX-69029001-69030000	-32.0078	group_4	ENSG00000181191	PJA1	Distal Intergenic	full_rescue	NA
chrX-69026001-69027000	-34.9206	group_4	ENSG00000181191	PJA1	Distal Intergenic	full_rescue	NA
chrX-69023001-69024000	-29.6852	group_4	ENSG00000181191	PJA1	Distal Intergenic	full_rescue	NA
chrX-69022001-69023000	-27.5	group_4	ENSG00000181191	PJA1	Distal Intergenic	full_rescue	NA
chrX-69020001-69021000	-31.1688	group_4	ENSG00000181191	PJA1	Distal Intergenic	partial_rescue	NA
chrX-69016001-69017000	-50.5517	group_3	ENSG00000181191	PJA1	Distal Intergenic	full_rescue	NA
chrX-68989001-68990000	-28.606	group_3	ENSG00000090776	EFNB1	Distal Intergenic	partial_rescue	GH_only
chrX-68981001-68982000	-30.1179	group_3	ENSG00000090776	EFNB1	Distal Intergenic	full_rescue	NA
chrX-68952001-68953000	-36.0879	group_4	ENSG00000090776	EFNB1	Distal Intergenic	full_rescue	NA
chrX-68940001-68941000	-34.2786	group_4	ENSG00000090776	EFNB1	Distal Intergenic	full_rescue	NA
chrX-68927001-68928000	-33.0556	group_3	ENSG00000090776	EFNB1	Distal Intergenic	full_rescue	NA
chrX-68917001-68918000	-28.2371	group_4	ENSG00000090776	EFNB1	Distal Intergenic	full_rescue	NA
chrX-68893001-68894000	-36.3378	group_4	ENSG00000090776	EFNB1	Distal Intergenic	full_rescue	NA
chrX-68876001-68877000	-26.4156	group_4	ENSG00000090776	EFNB1	Distal Intergenic	partial_rescue	NA
chrX-68873001-68874000	-30.137	group_4	ENSG00000090776	EFNB1	Distal Intergenic	no_rescue	NA
chrX-68867001-68868000	-34.8296	group_2	ENSG00000090776	EFNB1	Distal Intergenic	full_rescue	NA
chrX-68849001-68850000	-44.4444	group_4	ENSG00000090776	EFNB1	Distal Intergenic	full_rescue	NA
chrX-68838001-68839000	-26.6409	group_4	ENSG00000090776	EFNB1	Exon (ENST00000204961/ENSG00000090776, exon 2 of 5)	full_rescue	CGI_only
chrX-68835001-68836000	-48.8506	group_3	ENSG00000090776	EFNB1	Intron (ENST00000204961/ENSG00000090776, intron 1 of 4)	full_rescue	NA
chrX-68834001-68835000	-41.2442	group_4	ENSG00000090776	EFNB1	Intron (ENST00000204961/ENSG00000090776, intron 1 of 4)	full_rescue	NA
chrX-68821001-68822000	-33.1193	group_4	ENSG00000090776	EFNB1	Distal Intergenic	full_rescue	NA
chrX-68784001-68785000	-28.5358	group_4	ENSG00000213740	SERBP1P1	Promoter (<=1kb)	full_rescue	CGI_only
chrX-68769001-68770000	-33.7662	group_4	ENSG00000232267	ACTR3P2	Promoter (1-2kb)	full_rescue	NA
chrX-68759001-68760000	-28.8265	group_3	ENSG00000232267	ACTR3P2	Distal Intergenic	full_rescue	NA
chrX-68755001-68756000	-50	group_3	ENSG00000232267	ACTR3P2	Distal Intergenic	full_rescue	NA
chrX-68736001-68737000	-30.6478	group_3	ENSG00000232267	ACTR3P2	Distal Intergenic	partial_rescue	NA
chrX-68734001-68735000	-48.8043	group_4	ENSG00000232267	ACTR3P2	Distal Intergenic	full_rescue	NA
chrX-68704001-68705000	-26.5193	group_4	ENSG00000130052	STARD8	Intron (ENST00000252336/ENSG00000130052, intron 2 of 13)	full_rescue	GH_only
chrX-68688001-68689000	-53.4884	group_3	ENSG00000130052	STARD8	Intron (ENST00000252336/ENSG00000130052, intron 2 of 13)	partial_rescue	CGI_and_GH
chrX-68685001-68686000	-54.1667	group_2	ENSG00000130052	STARD8	Intron (ENST00000252336/ENSG00000130052, intron 2 of 13)	full_rescue	CGI_and_GH
chrX-68682001-68683000	-31.6667	group_4	ENSG00000130052	STARD8	Intron (ENST00000252336/ENSG00000130052, intron 2 of 13)	full_rescue	GH_only
chrX-68680001-68681000	-31.0714	group_4	ENSG00000130052	STARD8	Intron (ENST00000252336/ENSG00000130052, intron 2 of 13)	full_rescue	GH_only
chrX-68664001-68665000	-43.3962	group_4	ENSG00000130052	STARD8	Intron (ENST00000252336/ENSG00000130052, intron 1 of 13)	full_rescue	NA
chrX-68660001-68661000	-72.5	group_3	ENSG00000130052	STARD8	Intron (ENST00000252336/ENSG00000130052, intron 1 of 13)	full_rescue	NA
chrX-68581001-68582000	-40.946	group_3	ENSG00000236735	RPL31P63	Distal Intergenic	full_rescue	NA
chrX-68500001-68501000	-61.1111	group_4	ENSG00000181704	YIPF6	Intron (ENST00000451537/ENSG00000181704, intron 1 of 5)	full_rescue	CGI_and_GH
chrX-68481001-68482000	-36.3917	group_3	ENSG00000225925	RP13-313G19.2	Distal Intergenic	no_rescue	NA
chrX-68476001-68477000	-43.056	group_4	ENSG00000225925	RP13-313G19.2	Exon (ENST00000450604/ENSG00000225925, exon 2 of 3)	full_rescue	NA
chrX-68461001-68462000	-35.7127	group_3	ENSG00000225925	RP13-313G19.2	Distal Intergenic	full_rescue	NA
chrX-68422001-68423000	-25.8683	group_3	ENSG00000079482	OPHN1	Intron (ENST00000680612/ENSG00000079482, intron 2 of 19)	full_rescue	NA
chrX-684001-685000	-28.6284	group_3	ENSG00000185960	SHOX	Distal Intergenic	partial_rescue	NA
chrX-68387001-68388000	-40.6496	group_4	ENSG00000079482	OPHN1	Intron (ENST00000680612/ENSG00000079482, intron 2 of 19)	full_rescue	NA
chrX-68330001-68331000	-46.6667	group_3	ENSG00000079482	OPHN1	Intron (ENST00000680612/ENSG00000079482, intron 2 of 19)	full_rescue	NA
chrX-68264001-68265000	-50.5742	group_3	ENSG00000079482	OPHN1	Intron (ENST00000680612/ENSG00000079482, intron 5 of 19)	partial_rescue	NA
chrX-68246001-68247000	-38.898	group_3	ENSG00000079482	OPHN1	Intron (ENST00000680612/ENSG00000079482, intron 5 of 19)	full_rescue	NA
chrX-68239001-68240000	-44	group_4	ENSG00000079482	OPHN1	Intron (ENST00000680612/ENSG00000079482, intron 5 of 19)	full_rescue	NA
chrX-68233001-68234000	-50.1279	group_3	ENSG00000079482	OPHN1	Exon (ENST00000680417/ENSG00000079482, exon 4 of 4)	full_rescue	NA
chrX-68217001-68218000	-31.6064	group_4	ENSG00000079482	OPHN1	Intron (ENST00000680612/ENSG00000079482, intron 6 of 19)	full_rescue	NA
chrX-68201001-68202000	-44.0379	group_3	ENSG00000079482	OPHN1	Exon (ENST00000680612/ENSG00000079482, exon 11 of 20)	full_rescue	NA
chrX-68152001-68153000	-27.6899	group_4	ENSG00000079482	OPHN1	Intron (ENST00000680612/ENSG00000079482, intron 15 of 19)	full_rescue	NA
chrX-68115001-68116000	-41.6667	group_4	ENSG00000079482	OPHN1	Intron (ENST00000680612/ENSG00000079482, intron 16 of 19)	full_rescue	NA
chrX-68094001-68095000	-25.8333	group_4	ENSG00000079482	OPHN1	Intron (ENST00000680612/ENSG00000079482, intron 19 of 19)	full_rescue	NA
chrX-68050001-68051000	-53.4409	group_3	ENSG00000079482	OPHN1	Intron (ENST00000680612/ENSG00000079482, intron 19 of 19)	partial_rescue	NA
chrX-68018001-68019000	-50.7496	group_3	ENSG00000260118	RP6-201G10.2	Intron (ENST00000680612/ENSG00000079482, intron 19 of 19)	full_rescue	NA
chrX-67963001-67964000	-70.8333	group_3	ENSG00000260118	RP6-201G10.2	Intron (ENST00000680612/ENSG00000079482, intron 19 of 19)	full_rescue	NA
chrX-67888001-67889000	-29.5706	group_4	ENSG00000234201	BMI1P1	Distal Intergenic	full_rescue	NA
chrX-67838001-67839000	-52.3077	group_4	ENSG00000234201	BMI1P1	Distal Intergenic	full_rescue	NA
chrX-67769001-67770000	-46.6184	group_3	ENSG00000234201	BMI1P1	Distal Intergenic	partial_rescue	NA
chrX-67745001-67746000	-43.8452	group_4	ENSG00000234201	BMI1P1	Distal Intergenic	partial_rescue	NA
chrX-67723001-67724000	-27.7497	group_4	ENSG00000169083	AR	3' UTR	full_rescue	NA
chrX-67721001-67722000	-43.8393	group_3	ENSG00000169083	AR	3' UTR	full_rescue	NA
chrX-67708001-67709000	-31.8151	group_4	ENSG00000169083	AR	Intron (ENST00000374690/ENSG00000169083, intron 3 of 7)	full_rescue	NA
chrX-676001-677000	-25.4042	group_3	ENSG00000185960	SHOX	Distal Intergenic	full_rescue	NA
chrX-67543001-67544000	-55.7353	group_3	ENSG00000169083	AR	Promoter (<=1kb)	partial_rescue	CGI_and_GH
chrX-67438001-67439000	-45.0535	group_3	ENSG00000226280	RP6-22P16.1	Distal Intergenic	partial_rescue	NA
chrX-67358001-67359000	-30.7143	group_4	ENSG00000226280	RP6-22P16.1	Distal Intergenic	full_rescue	NA
chrX-67354001-67355000	-34.9206	group_4	ENSG00000226280	RP6-22P16.1	Distal Intergenic	no_rescue	NA
chrX-67021001-67022000	-53.4409	group_4	ENSG00000222667	RNU6-394P	Distal Intergenic	full_rescue	NA
chrX-66943001-66944000	-38.5776	group_4	ENSG00000222667	RNU6-394P	Distal Intergenic	partial_rescue	NA
chrX-66930001-66931000	-38.835	group_4	ENSG00000222667	RNU6-394P	Distal Intergenic	full_rescue	NA
chrX-66837001-66838000	-66.6667	group_4	ENSG00000222667	RNU6-394P	Distal Intergenic	full_rescue	NA
chrX-66719001-66720000	-28.5091	group_3	ENSG00000222667	RNU6-394P	Distal Intergenic	partial_rescue	NA
chrX-667001-668000	-37.0968	group_2	ENSG00000185960	SHOX	Distal Intergenic	full_rescue	NA
chrX-66625001-66626000	-32.2412	group_4	ENSG00000131080	EDA2R	Intron (ENST00000374719/ENSG00000131080, intron 1 of 6)	partial_rescue	NA
chrX-666001-667000	-30.4472	group_3	ENSG00000185960	SHOX	Distal Intergenic	full_rescue	CGI_only
chrX-66597001-66598000	-37.9386	group_4	ENSG00000131080	EDA2R	3' UTR	full_rescue	NA
chrX-66534001-66535000	-43.19	group_3	ENSG00000235892	PKMP2	Distal Intergenic	full_rescue	NA
chrX-66498001-66499000	-45.2123	group_3	ENSG00000235892	PKMP2	Promoter (<=1kb)	full_rescue	NA
chrX-66490001-66491000	-34.2105	group_4	ENSG00000235892	PKMP2	Distal Intergenic	partial_rescue	NA
chrX-66456001-66457000	-55.3226	group_2	ENSG00000226820	RP11-747I9.1	Distal Intergenic	full_rescue	NA
chrX-66454001-66455000	-50.3431	group_3	ENSG00000226820	RP11-747I9.1	Distal Intergenic	full_rescue	NA
chrX-66437001-66438000	-27.8797	group_4	ENSG00000226820	RP11-747I9.1	Promoter (<=1kb)	full_rescue	NA
chrX-66434001-66435000	-45.614	group_4	ENSG00000226820	RP11-747I9.1	Distal Intergenic	full_rescue	NA
chrX-66348001-66349000	-54.1667	group_3	ENSG00000231356	RP13-238N7.2	Distal Intergenic	full_rescue	NA
chrX-66308001-66309000	-33.8099	group_2	ENSG00000231356	RP13-238N7.2	Distal Intergenic	full_rescue	NA
chrX-66307001-66308000	-34.2857	group_4	ENSG00000231356	RP13-238N7.2	Distal Intergenic	full_rescue	NA
chrX-66300001-66301000	-34.9462	group_3	ENSG00000231356	RP13-238N7.2	Distal Intergenic	full_rescue	NA
chrX-66254001-66255000	-45.21	group_3	ENSG00000089472	HEPH	Intron (ENST00000519389/ENSG00000089472, intron 15 of 20)	full_rescue	NA
chrX-66225001-66226000	-53.3333	group_4	ENSG00000089472	HEPH	Intron (ENST00000519389/ENSG00000089472, intron 15 of 20)	full_rescue	NA
chrX-66210001-66211000	-50.4141	group_4	ENSG00000089472	HEPH	Intron (ENST00000519389/ENSG00000089472, intron 15 of 20)	full_rescue	NA
chrX-66201001-66202000	-40.7561	group_4	ENSG00000089472	HEPH	Intron (ENST00000519389/ENSG00000089472, intron 12 of 20)	full_rescue	NA
chrX-66194001-66195000	-45.3581	group_3	ENSG00000089472	HEPH	Intron (ENST00000519389/ENSG00000089472, intron 8 of 20)	full_rescue	NA
chrX-66075001-66076000	-33.2688	group_4	ENSG00000237294	EIF4BP9	Promoter (<=1kb)	full_rescue	NA
chrX-66056001-66057000	-27.2727	group_4	ENSG00000215168	RP11-30M20.1	Promoter (<=1kb)	full_rescue	NA
chrX-66030001-66031000	-40.3409	group_2	ENSG00000155659	VSIG4	Intron (ENST00000427538/ENSG00000155659, intron 2 of 6)	partial_rescue	NA
chrX-65956001-65957000	-38.2353	group_4	ENSG00000237311	RP6-159A1.3	Exon (ENST00000456392/ENSG00000217835, exon 1 of 1)	full_rescue	NA
chrX-65925001-65926000	-54.1667	group_3	ENSG00000237311	RP6-159A1.3	Promoter (<=1kb)	full_rescue	NA
chrX-65874001-65875000	-44.0476	group_4	ENSG00000237311	RP6-159A1.3	Distal Intergenic	full_rescue	NA
chrX-65857001-65858000	-41.1765	group_4	ENSG00000230039	RP11-314A15.2	Distal Intergenic	full_rescue	NA
chrX-65855001-65856000	-85.7143	group_3	ENSG00000230039	RP11-314A15.2	Distal Intergenic	full_rescue	NA
chrX-65809001-65810000	-47.5382	group_3	ENSG00000230039	RP11-314A15.2	Distal Intergenic	full_rescue	NA
chrX-658001-659000	-36.6667	group_4	ENSG00000185960	SHOX	3' UTR	partial_rescue	NA
chrX-65786001-65787000	-33.961	group_4	ENSG00000276689	RP11-314A15.3	Promoter (<=1kb)	full_rescue	NA
chrX-65773001-65774000	-37.5	group_4	ENSG00000231809	NANOGP9	Promoter (<=1kb)	full_rescue	NA
chrX-65752001-65753000	-54.0351	group_4	ENSG00000231809	NANOGP9	Distal Intergenic	full_rescue	NA
chrX-65746001-65747000	-39.7071	group_3	ENSG00000231809	NANOGP9	Distal Intergenic	no_rescue	NA
chrX-65705001-65706000	-28.783	group_4	ENSG00000147065	MSN	Intron (ENST00000609672/ENSG00000147065, intron 1 of 3)	full_rescue	GH_only
chrX-65694001-65695000	-26.6186	group_4	ENSG00000147065	MSN	Intron (ENST00000609672/ENSG00000147065, intron 1 of 3)	partial_rescue	GH_only
chrX-65676001-65677000	-45.7071	group_3	ENSG00000147065	MSN	Intron (ENST00000609672/ENSG00000147065, intron 1 of 3)	full_rescue	GH_only
chrX-65598001-65599000	-27.4004	group_3	ENSG00000147065	MSN	Intron (ENST00000609672/ENSG00000147065, intron 1 of 3)	full_rescue	GH_only
chrX-65589001-65590000	-56.3492	group_3	ENSG00000147065	MSN	Promoter (<=1kb)	full_rescue	NA
chrX-65586001-65587000	-51.6194	group_4	ENSG00000147065	MSN	Promoter (1-2kb)	full_rescue	NA
chrX-65583001-65584000	-26.3413	group_4	ENSG00000147065	MSN	Distal Intergenic	full_rescue	NA
chrX-65552001-65553000	-26.3736	group_4	ENSG00000227942	FRMD8P1	Promoter (<=1kb)	full_rescue	CGI_only
chrX-65551001-65552000	-25.5764	group_4	ENSG00000227942	FRMD8P1	Promoter (<=1kb)	full_rescue	CGI_only
chrX-6552001-6553000	-41.2698	group_4	ENSG00000169059	VCX3A	Distal Intergenic	partial_rescue	NA
chrX-65518001-65519000	-29.1643	group_4	ENSG00000001497	LAS1L	3' UTR	partial_rescue	NA
chrX-65455001-65456000	-31.3889	group_4	ENSG00000102053	ZC3H12B	Intron (ENST00000617377/ENSG00000102053, intron 3 of 5)	full_rescue	NA
chrX-65454001-65455000	-38.4361	group_4	ENSG00000102053	ZC3H12B	Intron (ENST00000617377/ENSG00000102053, intron 3 of 5)	full_rescue	NA
chrX-65392001-65393000	-66.6667	group_3	ENSG00000102053	ZC3H12B	Intron (ENST00000617377/ENSG00000102053, intron 2 of 5)	full_rescue	NA
chrX-65379001-65380000	-36.4588	group_4	ENSG00000102053	ZC3H12B	Intron (ENST00000617377/ENSG00000102053, intron 2 of 5)	full_rescue	NA
chrX-65254001-65255000	-35	group_4	ENSG00000225569	CCT4P2	Distal Intergenic	full_rescue	NA
chrX-65248001-65249000	-54.4643	group_3	ENSG00000225569	CCT4P2	Distal Intergenic	full_rescue	NA
chrX-65224001-65225000	-27.9786	group_4	ENSG00000237971	RP11-231N9.1	Distal Intergenic	full_rescue	NA
chrX-652001-653000	-70	group_2	ENSG00000185960	SHOX	Intron (ENST00000334060/ENSG00000185960, intron 5 of 5)	partial_rescue	NA
chrX-65175001-65176000	-75	group_3	ENSG00000237971	RP11-231N9.1	Distal Intergenic	full_rescue	NA
chrX-65148001-65149000	-35.3936	group_4	ENSG00000237971	RP11-231N9.1	Distal Intergenic	full_rescue	NA
chrX-65134001-65135000	-43.8943	group_3	ENSG00000237971	RP11-231N9.1	Distal Intergenic	full_rescue	NA
chrX-65130001-65131000	-37.0734	group_4	ENSG00000237971	RP11-231N9.1	Distal Intergenic	full_rescue	NA
chrX-65102001-65103000	-85.7143	group_3	ENSG00000126970	ZC4H2	Distal Intergenic	full_rescue	NA
chrX-65087001-65088000	-31.3725	group_4	ENSG00000126970	ZC4H2	Distal Intergenic	full_rescue	NA
chrX-65058001-65059000	-26.8116	group_4	ENSG00000126970	ZC4H2	Distal Intergenic	partial_rescue	NA
chrX-65029001-65030000	-34.6154	group_4	ENSG00000126970	ZC4H2	Intron (ENST00000337990/ENSG00000126970, intron 1 of 4)	partial_rescue	NA
chrX-64981001-64982000	-48.5746	group_3	ENSG00000126970	ZC4H2	Intron (ENST00000337990/ENSG00000126970, intron 1 of 4)	full_rescue	NA
chrX-64919001-64920000	-33.2051	group_4	ENSG00000126970	ZC4H2	Exon (ENST00000374839/ENSG00000126970, exon 4 of 5)	full_rescue	NA
chrX-64908001-64909000	-52.9167	group_3	ENSG00000126970	ZC4H2	Distal Intergenic	partial_rescue	NA
chrX-649001-650000	-32.9228	group_3	ENSG00000185960	SHOX	Intron (ENST00000334060/ENSG00000185960, intron 5 of 5)	full_rescue	NA
chrX-64856001-64857000	-39.0534	group_4	ENSG00000236982	BLOC1S2P1	Distal Intergenic	full_rescue	NA
chrX-64850001-64851000	-25.89	group_4	ENSG00000236982	BLOC1S2P1	Distal Intergenic	full_rescue	NA
chrX-64846001-64847000	-45.7627	group_4	ENSG00000236982	BLOC1S2P1	Distal Intergenic	full_rescue	NA
chrX-64843001-64844000	-33.8983	group_4	ENSG00000236982	BLOC1S2P1	Distal Intergenic	partial_rescue	NA
chrX-64808001-64809000	-62.5	group_3	ENSG00000236982	BLOC1S2P1	Distal Intergenic	full_rescue	NA
chrX-648001-649000	-32.4608	group_3	ENSG00000185960	SHOX	Intron (ENST00000334060/ENSG00000185960, intron 5 of 5)	partial_rescue	NA
chrX-64698001-64699000	-33.8893	group_4	ENSG00000225814	GRPEL2P2	Promoter (<=1kb)	no_rescue	NA
chrX-64654001-64655000	-36.5263	group_3	ENSG00000226502	KRT8P27	Distal Intergenic	no_rescue	NA
chrX-64651001-64652000	-28.9204	group_4	ENSG00000226502	KRT8P27	Distal Intergenic	full_rescue	NA
chrX-64647001-64648000	-28.4091	group_4	ENSG00000226502	KRT8P27	Distal Intergenic	full_rescue	NA
chrX-64580001-64581000	-49.7144	group_3	ENSG00000227261	YWHAZP7	Distal Intergenic	full_rescue	NA
chrX-64518001-64519000	-64.1414	group_3	ENSG00000230889	SHC1P1	Distal Intergenic	full_rescue	NA
chrX-64513001-64514000	-33.0531	group_3	ENSG00000230889	SHC1P1	Distal Intergenic	full_rescue	NA
chrX-64491001-64492000	-37.3379	group_3	ENSG00000230889	SHC1P1	Distal Intergenic	partial_rescue	NA
chrX-64477001-64478000	-76.4286	group_3	ENSG00000230889	SHC1P1	Distal Intergenic	full_rescue	NA
chrX-64439001-64440000	-69.2105	group_3	ENSG00000230889	SHC1P1	Distal Intergenic	full_rescue	NA
chrX-64396001-64397000	-39.9808	group_3	ENSG00000102043	MTMR8	Promoter (<=1kb)	partial_rescue	CGI_only
chrX-64387001-64388000	-66.6667	group_3	ENSG00000102043	MTMR8	Intron (ENST00000374852/ENSG00000102043, intron 1 of 13)	partial_rescue	NA
chrX-64385001-64386000	-58.3883	group_3	ENSG00000102043	MTMR8	Intron (ENST00000374852/ENSG00000102043, intron 1 of 13)	partial_rescue	NA
chrX-64340001-64341000	-33.2367	group_4	ENSG00000102043	MTMR8	Intron (ENST00000374852/ENSG00000102043, intron 8 of 13)	full_rescue	NA
chrX-64333001-64334000	-46.7532	group_4	ENSG00000102043	MTMR8	Intron (ENST00000374852/ENSG00000102043, intron 10 of 13)	partial_rescue	NA
chrX-643001-644000	-71.5909	group_2	ENSG00000185960	SHOX	Intron (ENST00000381578/ENSG00000185960, intron 5 of 5)	partial_rescue	CGI_only
chrX-64278001-64279000	-33.1522	group_4	ENSG00000102043	MTMR8	Intron (ENST00000374852/ENSG00000102043, intron 12 of 13)	full_rescue	NA
chrX-64220001-64221000	-38.2353	group_4	ENSG00000287370	NA	Intron (ENST00000671386/ENSG00000287370, intron 2 of 2)	full_rescue	NA
chrX-64219001-64220000	-60	group_4	ENSG00000287370	NA	Intron (ENST00000671386/ENSG00000287370, intron 2 of 2)	full_rescue	NA
chrX-64212001-64213000	-68.3297	group_3	ENSG00000287370	NA	Intron (ENST00000671386/ENSG00000287370, intron 2 of 2)	full_rescue	NA
chrX-64199001-64200000	-33.3333	group_4	ENSG00000184675	AMER1	Intron (ENST00000374869/ENSG00000184675, intron 1 of 1)	full_rescue	NA
chrX-64191001-64192000	-30.7386	group_4	ENSG00000184675	AMER1	Exon (ENST00000374869/ENSG00000184675, exon 2 of 2)	full_rescue	NA
chrX-64178001-64179000	-39.2045	group_4	ENSG00000184675	AMER1	Distal Intergenic	full_rescue	NA
chrX-64101001-64102000	-29.8507	group_4	ENSG00000226010	RP11-403E24.1	Distal Intergenic	full_rescue	NA
chrX-64080001-64081000	-58.8235	group_4	ENSG00000232794	HNRNPDP1	Distal Intergenic	full_rescue	NA
chrX-64063001-64064000	-50	group_4	ENSG00000232794	HNRNPDP1	Distal Intergenic	full_rescue	NA
chrX-64062001-64063000	-43.1034	group_4	ENSG00000232794	HNRNPDP1	Distal Intergenic	partial_rescue	NA
chrX-64044001-64045000	-29.7831	group_4	ENSG00000232794	HNRNPDP1	Promoter (<=1kb)	full_rescue	CGI_only
chrX-64038001-64039000	-40.9888	group_4	ENSG00000232794	HNRNPDP1	Distal Intergenic	full_rescue	NA
chrX-64006001-64007000	-28.154	group_3	ENSG00000232794	HNRNPDP1	Distal Intergenic	full_rescue	NA
chrX-63987001-63988000	-59.4417	group_3	ENSG00000232794	HNRNPDP1	Distal Intergenic	full_rescue	NA
chrX-63932001-63933000	-37.8676	group_4	ENSG00000232794	HNRNPDP1	Distal Intergenic	full_rescue	NA
chrX-63930001-63931000	-46.9231	group_3	ENSG00000232794	HNRNPDP1	Distal Intergenic	full_rescue	NA
chrX-63904001-63905000	-35.6377	group_4	ENSG00000131089	ARHGEF9	Distal Intergenic	full_rescue	NA
chrX-63900001-63901000	-90.9091	group_3	ENSG00000131089	ARHGEF9	Distal Intergenic	full_rescue	NA
chrX-63899001-63900000	-50	group_4	ENSG00000131089	ARHGEF9	Distal Intergenic	partial_rescue	NA
chrX-63892001-63893000	-56.25	group_4	ENSG00000131089	ARHGEF9	Distal Intergenic	full_rescue	NA
chrX-63885001-63886000	-28.4014	group_4	ENSG00000131089	ARHGEF9	Distal Intergenic	full_rescue	NA
chrX-63879001-63880000	-46.6414	group_4	ENSG00000131089	ARHGEF9	Distal Intergenic	full_rescue	NA
chrX-63865001-63866000	-50.9804	group_4	ENSG00000131089	ARHGEF9	Distal Intergenic	full_rescue	NA
chrX-63838001-63839000	-31.2057	group_4	ENSG00000131089	ARHGEF9	Distal Intergenic	full_rescue	NA
chrX-63833001-63834000	-29.023	group_4	ENSG00000131089	ARHGEF9	Distal Intergenic	full_rescue	NA
chrX-63815001-63816000	-59.0222	group_3	ENSG00000131089	ARHGEF9	Distal Intergenic	full_rescue	NA
chrX-63798001-63799000	-35.9924	group_4	ENSG00000131089	ARHGEF9	Intron (ENST00000623417/ENSG00000131089, intron 1 of 4)	full_rescue	NA
chrX-63791001-63792000	-30.6958	group_4	ENSG00000131089	ARHGEF9	Intron (ENST00000623417/ENSG00000131089, intron 2 of 4)	full_rescue	NA
chrX-63781001-63782000	-51.9841	group_3	ENSG00000131089	ARHGEF9	Intron (ENST00000671741/ENSG00000131089, intron 1 of 9)	full_rescue	NA
chrX-63778001-63779000	-33.5788	group_4	ENSG00000131089	ARHGEF9	Intron (ENST00000671741/ENSG00000131089, intron 1 of 9)	partial_rescue	NA
chrX-63746001-63747000	-43.8596	group_4	ENSG00000131089	ARHGEF9	Intron (ENST00000253401/ENSG00000131089, intron 1 of 9)	full_rescue	GH_only
chrX-63731001-63732000	-29.8246	group_4	ENSG00000131089	ARHGEF9	Intron (ENST00000253401/ENSG00000131089, intron 1 of 9)	full_rescue	NA
chrX-63709001-63710000	-34.4554	group_3	ENSG00000131089	ARHGEF9	Exon (ENST00000637391/ENSG00000131089, exon 2 of 2)	no_rescue	NA
chrX-63669001-63670000	-37.7953	group_4	ENSG00000131089	ARHGEF9	Intron (ENST00000253401/ENSG00000131089, intron 6 of 9)	partial_rescue	NA
chrX-63577001-63578000	-43.6765	group_3	ENSG00000235437	LINC01278	Distal Intergenic	full_rescue	NA
chrX-63542001-63543000	-41.3333	group_4	ENSG00000235437	LINC01278	Intron (ENST00000667050/ENSG00000235437, intron 1 of 5)	full_rescue	NA
chrX-63538001-63539000	-71.4286	group_4	ENSG00000235437	LINC01278	Intron (ENST00000667050/ENSG00000235437, intron 1 of 5)	full_rescue	NA
chrX-63492001-63493000	-49.2063	group_4	ENSG00000235437	LINC01278	Intron (ENST00000667050/ENSG00000235437, intron 2 of 5)	partial_rescue	NA
chrX-63478001-63479000	-43.0114	group_4	ENSG00000235437	LINC01278	Intron (ENST00000667050/ENSG00000235437, intron 2 of 5)	partial_rescue	NA
chrX-63430001-63431000	-35.2675	group_3	ENSG00000235437	LINC01278	Exon (ENST00000608623/ENSG00000235437, exon 1 of 1)	partial_rescue	NA
chrX-63426001-63427000	-73.3333	group_3	ENSG00000235437	LINC01278	Exon (ENST00000666216/ENSG00000235437, exon 3 of 4)	full_rescue	NA
chrX-63410001-63411000	-32.6632	group_4	ENSG00000235437	LINC01278	Intron (ENST00000667050/ENSG00000235437, intron 2 of 5)	partial_rescue	NA
chrX-63361001-63362000	-50	group_4	ENSG00000235437	LINC01278	Intron (ENST00000667050/ENSG00000235437, intron 3 of 5)	full_rescue	NA
chrX-63312001-63313000	-42.1687	group_4	ENSG00000235437	LINC01278	Exon (ENST00000661141/ENSG00000235437, exon 6 of 11)	full_rescue	NA
chrX-63311001-63312000	-38.1538	group_4	ENSG00000235437	LINC01278	Exon (ENST00000661141/ENSG00000235437, exon 6 of 11)	full_rescue	NA
chrX-63290001-63291000	-49.4279	group_3	ENSG00000235437	LINC01278	Intron (ENST00000667050/ENSG00000235437, intron 3 of 5)	full_rescue	NA
chrX-63281001-63282000	-27.3305	group_4	ENSG00000235437	LINC01278	Intron (ENST00000667050/ENSG00000235437, intron 3 of 5)	full_rescue	NA
chrX-63273001-63274000	-52.5912	group_3	ENSG00000235437	LINC01278	Intron (ENST00000667050/ENSG00000235437, intron 3 of 5)	full_rescue	NA
chrX-63103001-63104000	-67.1053	group_3	ENSG00000277499	RP11-144M17.1	Distal Intergenic	full_rescue	NA
chrX-63087001-63088000	-59.8039	group_2	ENSG00000277499	RP11-144M17.1	Promoter (<=1kb)	full_rescue	NA
chrX-63078001-63079000	-37.9939	group_3	ENSG00000277499	RP11-144M17.1	Distal Intergenic	full_rescue	NA
chrX-63031001-63032000	-46.5354	group_4	ENSG00000277499	RP11-144M17.1	Distal Intergenic	full_rescue	NA
chrX-62967001-62968000	-75.5357	group_2	ENSG00000234570	ZFRP1	Distal Intergenic	full_rescue	NA
chrX-62903001-62904000	-76.5789	group_3	ENSG00000234570	ZFRP1	Distal Intergenic	full_rescue	NA
chrX-62890001-62891000	-55.4545	group_2	ENSG00000234570	ZFRP1	Distal Intergenic	full_rescue	NA
chrX-62851001-62852000	-55	group_2	ENSG00000228182	MTND2P25	Distal Intergenic	full_rescue	NA
chrX-62838001-62839000	-48	group_4	ENSG00000235170	MTND1P31	Distal Intergenic	full_rescue	NA
chrX-62834001-62835000	-45.164	group_3	ENSG00000235170	MTND1P31	Distal Intergenic	full_rescue	NA
chrX-62829001-62830000	-56.3492	group_1	ENSG00000235170	MTND1P31	Distal Intergenic	full_rescue	NA
chrX-62556001-62557000	-40.0042	group_4	ENSG00000236852	RP11-3D23.1	Distal Intergenic	full_rescue	NA
chrX-62555001-62556000	-57.5632	group_3	ENSG00000236852	RP11-3D23.1	Distal Intergenic	full_rescue	NA
chrX-62517001-62518000	-50.8765	group_4	ENSG00000236852	RP11-3D23.1	Distal Intergenic	full_rescue	NA
chrX-58512001-58513000	-40.448	group_1	ENSG00000235124	KRT8P17	Distal Intergenic	full_rescue	NA
chrX-58511001-58512000	-38.2272	group_4	ENSG00000235124	KRT8P17	Distal Intergenic	partial_rescue	NA
chrX-58510001-58511000	-31.3766	group_4	ENSG00000235124	KRT8P17	Distal Intergenic	full_rescue	NA
chrX-58397001-58398000	-56.25	group_4	ENSG00000235124	KRT8P17	Distal Intergenic	full_rescue	NA
chrX-58396001-58397000	-72.6087	group_3	ENSG00000235124	KRT8P17	Distal Intergenic	full_rescue	NA
chrX-58358001-58359000	-26.9555	group_2	ENSG00000235124	KRT8P17	Distal Intergenic	full_rescue	NA
chrX-58292001-58293000	-25.1537	group_4	ENSG00000235124	KRT8P17	Distal Intergenic	full_rescue	NA
chrX-58291001-58292000	-59.3279	group_3	ENSG00000235124	KRT8P17	Distal Intergenic	full_rescue	NA
chrX-58290001-58291000	-40.8886	group_3	ENSG00000235124	KRT8P17	Distal Intergenic	full_rescue	NA
chrX-58289001-58290000	-45.1537	group_2	ENSG00000235124	KRT8P17	Distal Intergenic	full_rescue	NA
chrX-58288001-58289000	-53.9218	group_3	ENSG00000235124	KRT8P17	Distal Intergenic	full_rescue	NA
chrX-58286001-58287000	-30.4995	group_4	ENSG00000235124	KRT8P17	Distal Intergenic	full_rescue	NA
chrX-58277001-58278000	-54.4303	group_3	ENSG00000235124	KRT8P17	Distal Intergenic	no_rescue	NA
chrX-58274001-58275000	-36.3158	group_4	ENSG00000235124	KRT8P17	Distal Intergenic	full_rescue	NA
chrX-58273001-58274000	-38.5558	group_3	ENSG00000235124	KRT8P17	Distal Intergenic	full_rescue	NA
chrX-58272001-58273000	-36.5	group_3	ENSG00000235124	KRT8P17	Distal Intergenic	partial_rescue	NA
chrX-58271001-58272000	-50.7214	group_3	ENSG00000235124	KRT8P17	Distal Intergenic	full_rescue	NA
chrX-58270001-58271000	-31.5553	group_3	ENSG00000235124	KRT8P17	Distal Intergenic	full_rescue	NA
chrX-58269001-58270000	-34.6946	group_4	ENSG00000235124	KRT8P17	Distal Intergenic	full_rescue	NA
chrX-58267001-58268000	-47.0329	group_3	ENSG00000235124	KRT8P17	Distal Intergenic	full_rescue	NA
chrX-58266001-58267000	-38.6474	group_4	ENSG00000235124	KRT8P17	Distal Intergenic	full_rescue	NA
chrX-58265001-58266000	-26.612	group_4	ENSG00000235124	KRT8P17	Distal Intergenic	full_rescue	NA
chrX-58264001-58265000	-34.6966	group_4	ENSG00000235124	KRT8P17	Distal Intergenic	full_rescue	NA
chrX-58263001-58264000	-35.297	group_4	ENSG00000235124	KRT8P17	Distal Intergenic	full_rescue	NA
chrX-58262001-58263000	-28.3359	group_3	ENSG00000235124	KRT8P17	Distal Intergenic	full_rescue	NA
chrX-58259001-58260000	-31.1586	group_3	ENSG00000235124	KRT8P17	Distal Intergenic	full_rescue	NA
chrX-58258001-58259000	-51.0784	group_4	ENSG00000235124	KRT8P17	Distal Intergenic	full_rescue	NA
chrX-58257001-58258000	-31.3248	group_3	ENSG00000235124	KRT8P17	Distal Intergenic	full_rescue	NA
chrX-58255001-58256000	-28.7511	group_3	ENSG00000235124	KRT8P17	Distal Intergenic	full_rescue	NA
chrX-58252001-58253000	-54.6429	group_3	ENSG00000235124	KRT8P17	Distal Intergenic	full_rescue	NA
chrX-58250001-58251000	-58.5961	group_2	ENSG00000235124	KRT8P17	Distal Intergenic	full_rescue	NA
chrX-58248001-58249000	-48.1982	group_2	ENSG00000235124	KRT8P17	Distal Intergenic	full_rescue	NA
chrX-58242001-58243000	-54.7297	group_3	ENSG00000235124	KRT8P17	Distal Intergenic	full_rescue	NA
chrX-58239001-58240000	-60.6522	group_3	ENSG00000235124	KRT8P17	Distal Intergenic	partial_rescue	NA
chrX-58237001-58238000	-43.4675	group_3	ENSG00000235124	KRT8P17	Distal Intergenic	full_rescue	NA
chrX-58236001-58237000	-41.0726	group_3	ENSG00000235124	KRT8P17	Distal Intergenic	full_rescue	NA
chrX-58230001-58231000	-75	group_3	ENSG00000235124	KRT8P17	Distal Intergenic	full_rescue	NA
chrX-58229001-58230000	-60.6121	group_2	ENSG00000235124	KRT8P17	Distal Intergenic	full_rescue	NA
chrX-58228001-58229000	-94.1176	group_3	ENSG00000235124	KRT8P17	Distal Intergenic	partial_rescue	NA
chrX-58208001-58209000	-44.9252	group_3	ENSG00000235124	KRT8P17	Distal Intergenic	full_rescue	NA
chrX-58207001-58208000	-49.14	group_3	ENSG00000235124	KRT8P17	Distal Intergenic	full_rescue	NA
chrX-58205001-58206000	-62.9594	group_3	ENSG00000235124	KRT8P17	Distal Intergenic	full_rescue	NA
chrX-58191001-58192000	-72.7011	group_3	ENSG00000235124	KRT8P17	Distal Intergenic	full_rescue	NA
chrX-58188001-58189000	-66.2602	group_3	ENSG00000235124	KRT8P17	Distal Intergenic	full_rescue	NA
chrX-58187001-58188000	-64.5833	group_3	ENSG00000235124	KRT8P17	Distal Intergenic	full_rescue	NA
chrX-58144001-58145000	-56.4967	group_3	ENSG00000235124	KRT8P17	Distal Intergenic	full_rescue	NA
chrX-58143001-58144000	-65.2807	group_2	ENSG00000235124	KRT8P17	Distal Intergenic	full_rescue	NA
chrX-58142001-58143000	-55.9626	group_3	ENSG00000235124	KRT8P17	Distal Intergenic	full_rescue	NA
chrX-58141001-58142000	-82.6684	group_3	ENSG00000235124	KRT8P17	Distal Intergenic	full_rescue	NA
chrX-58140001-58141000	-69.0476	group_3	ENSG00000235124	KRT8P17	Distal Intergenic	full_rescue	NA
chrX-58137001-58138000	-31.401	group_4	ENSG00000235124	KRT8P17	Distal Intergenic	full_rescue	NA
chrX-58136001-58137000	-50.5541	group_3	ENSG00000235124	KRT8P17	Distal Intergenic	full_rescue	NA
chrX-58126001-58127000	-51.2384	group_2	ENSG00000235124	KRT8P17	Distal Intergenic	full_rescue	NA
chrX-58099001-58100000	-36.902	group_2	ENSG00000235124	KRT8P17	Distal Intergenic	full_rescue	NA
chrX-58085001-58086000	-46.5172	group_2	ENSG00000235124	KRT8P17	Distal Intergenic	full_rescue	NA
chrX-58084001-58085000	-71.5278	group_3	ENSG00000235124	KRT8P17	Distal Intergenic	full_rescue	NA
chrX-58083001-58084000	-52.9933	group_3	ENSG00000235124	KRT8P17	Distal Intergenic	full_rescue	NA
chrX-58081001-58082000	-51.8109	group_3	ENSG00000235124	KRT8P17	Distal Intergenic	full_rescue	NA
chrX-58080001-58081000	-63.8216	group_3	ENSG00000235124	KRT8P17	Distal Intergenic	partial_rescue	NA
chrX-58076001-58077000	-95.2381	group_2	ENSG00000235124	KRT8P17	Distal Intergenic	partial_rescue	NA
chrX-58006001-58007000	-66.3636	group_3	ENSG00000235124	KRT8P17	Distal Intergenic	full_rescue	NA
chrX-58003001-58004000	-61.9565	group_3	ENSG00000235124	KRT8P17	Distal Intergenic	full_rescue	NA
chrX-57986001-57987000	-58.0877	group_3	ENSG00000235124	KRT8P17	Exon (ENST00000453110/ENSG00000235124, exon 1 of 1)	full_rescue	NA
chrX-57985001-57986000	-49.1868	group_3	ENSG00000235124	KRT8P17	Promoter (<=1kb)	full_rescue	NA
chrX-57976001-57977000	-47.5155	group_2	ENSG00000235124	KRT8P17	Distal Intergenic	full_rescue	NA
chrX-57925001-57926000	-39.4463	group_3	ENSG00000228004	MYCLP2	Distal Intergenic	full_rescue	NA
chrX-57909001-57910000	-36.8161	group_3	ENSG00000198205	ZXDA	Promoter (<=1kb)	full_rescue	CGI_only
chrX-57908001-57909000	-57.4485	group_3	ENSG00000198205	ZXDA	3' UTR	full_rescue	CGI_only
chrX-57855001-57856000	-42.2492	group_3	ENSG00000198205	ZXDA	Distal Intergenic	full_rescue	NA
chrX-57819001-57820000	-37.963	group_2	ENSG00000227427	RP1-49C23.1	Distal Intergenic	full_rescue	NA
chrX-578001-579000	-53.6458	group_2	ENSG00000229232	KRT18P53	Distal Intergenic	full_rescue	NA
chrX-57731001-57732000	-33.4131	group_4	ENSG00000227427	RP1-49C23.1	Distal Intergenic	full_rescue	NA
chrX-57685001-57686000	-36.6013	group_4	ENSG00000215174	NLRP2B	Distal Intergenic	full_rescue	NA
chrX-57679001-57680000	-34.8718	group_4	ENSG00000215174	NLRP2B	Promoter (<=1kb)	full_rescue	NA
chrX-57444001-57445000	-56.6418	group_3	ENSG00000165591	FAAH2	Intron (ENST00000374900/ENSG00000165591, intron 8 of 10)	full_rescue	NA
chrX-57406001-57407000	-81.5476	group_2	ENSG00000165591	FAAH2	Intron (ENST00000374900/ENSG00000165591, intron 7 of 10)	full_rescue	NA
chrX-57401001-57402000	-28.0272	group_4	ENSG00000165591	FAAH2	Intron (ENST00000374900/ENSG00000165591, intron 7 of 10)	full_rescue	NA
chrX-57271001-57272000	-53.3333	group_4	ENSG00000165591	FAAH2	Distal Intergenic	full_rescue	NA
chrX-57240001-57241000	-43.2701	group_4	ENSG00000231765	PPP1R11P2	Distal Intergenic	no_rescue	NA
chrX-57228001-57229000	-66.6667	group_4	ENSG00000231765	PPP1R11P2	Promoter (<=1kb)	full_rescue	NA
chrX-57223001-57224000	-26.8693	group_4	ENSG00000286977	NA	Promoter (<=1kb)	full_rescue	NA
chrX-57222001-57223000	-26.6592	group_4	ENSG00000286977	NA	Promoter (<=1kb)	full_rescue	NA
chrX-57119001-57120000	-34.4218	group_4	ENSG00000186787	SPIN2B	3' UTR	full_rescue	CGI_and_GH
chrX-57090001-57091000	-34.582	group_4	ENSG00000237708	RP11-445O16.2	Distal Intergenic	full_rescue	NA
chrX-57049001-57050000	-32.4525	group_4	ENSG00000237708	RP11-445O16.2	Distal Intergenic	full_rescue	NA
chrX-57044001-57045000	-37.7778	group_4	ENSG00000237708	RP11-445O16.2	Distal Intergenic	full_rescue	NA
chrX-57037001-57038000	-43.9184	group_4	ENSG00000237708	RP11-445O16.2	Distal Intergenic	full_rescue	NA
chrX-56920001-56921000	-88.8889	group_3	ENSG00000204271	SPIN3	Intron (ENST00000640101/ENSG00000204271, intron 4 of 7)	full_rescue	NA
chrX-56867001-56868000	-32.3422	group_4	ENSG00000204271	SPIN3	Intron (ENST00000640101/ENSG00000204271, intron 4 of 7)	full_rescue	NA
chrX-56841001-56842000	-40.5462	group_3	ENSG00000204271	SPIN3	Intron (ENST00000640101/ENSG00000204271, intron 7 of 7)	partial_rescue	NA
chrX-56811001-56812000	-55.2239	group_4	ENSG00000204272	LINC01420	3' UTR	full_rescue	NA
chrX-56804001-56805000	-63.3152	group_3	ENSG00000204272	LINC01420	Intron (ENST00000637096/ENSG00000204272, intron 2 of 3)	full_rescue	NA
chrX-56798001-56799000	-30.4603	group_4	ENSG00000204272	LINC01420	Intron (ENST00000637096/ENSG00000204272, intron 2 of 3)	full_rescue	NA
chrX-56782001-56783000	-37.1429	group_4	ENSG00000204272	LINC01420	Intron (ENST00000637096/ENSG00000204272, intron 2 of 3)	full_rescue	NA
chrX-56764001-56765000	-31.7225	group_3	ENSG00000204272	LINC01420	Intron (ENST00000637096/ENSG00000204272, intron 2 of 3)	full_rescue	NA
chrX-56757001-56758000	-73.43	group_2	ENSG00000204272	LINC01420	Intron (ENST00000637096/ENSG00000204272, intron 2 of 3)	partial_rescue	NA
chrX-56737001-56738000	-44.7368	group_4	ENSG00000237748	UQCRBP1	Promoter (<=1kb)	full_rescue	NA
chrX-56663001-56664000	-56.4286	group_3	ENSG00000230105	RP11-431N15.2	Distal Intergenic	full_rescue	NA
chrX-56647001-56648000	-37.2738	group_4	ENSG00000230105	RP11-431N15.2	Distal Intergenic	full_rescue	NA
chrX-56635001-56636000	-50	group_4	ENSG00000230105	RP11-431N15.2	Distal Intergenic	full_rescue	NA
chrX-56594001-56595000	-64.5833	group_3	ENSG00000230105	RP11-431N15.2	Distal Intergenic	partial_rescue	NA
chrX-56508001-56509000	-36.7925	group_3	ENSG00000188021	UBQLN2	Distal Intergenic	full_rescue	NA
chrX-56505001-56506000	-46.0189	group_3	ENSG00000188021	UBQLN2	Distal Intergenic	full_rescue	NA
chrX-56494001-56495000	-26.5642	group_4	ENSG00000188021	UBQLN2	Distal Intergenic	full_rescue	NA
chrX-56394001-56395000	-100	group_3	ENSG00000234135	RPL23AP83	Distal Intergenic	full_rescue	NA
chrX-56368001-56369000	-40	group_4	ENSG00000234135	RPL23AP83	Distal Intergenic	full_rescue	NA
chrX-56367001-56368000	-39.5349	group_4	ENSG00000234135	RPL23AP83	Distal Intergenic	full_rescue	NA
chrX-56350001-56351000	-92.8571	group_3	ENSG00000234135	RPL23AP83	Distal Intergenic	full_rescue	NA
chrX-56330001-56331000	-27.9492	group_4	ENSG00000234135	RPL23AP83	Distal Intergenic	full_rescue	NA
chrX-56320001-56321000	-39.2536	group_3	ENSG00000234135	RPL23AP83	Distal Intergenic	full_rescue	NA
chrX-56284001-56285000	-55.8245	group_4	ENSG00000102349	KLF8	3' UTR	full_rescue	NA
chrX-56278001-56279000	-39.2157	group_4	ENSG00000102349	KLF8	Intron (ENST00000468660/ENSG00000102349, intron 5 of 5)	full_rescue	NA
chrX-56183001-56184000	-44.9123	group_4	ENSG00000227486	RP13-188A5.1	Intron (ENST00000669152/ENSG00000227486, intron 2 of 2)	partial_rescue	NA
chrX-56177001-56178000	-31.0284	group_4	ENSG00000227486	RP13-188A5.1	Intron (ENST00000669152/ENSG00000227486, intron 2 of 2)	full_rescue	NA
chrX-56130001-56131000	-38.7879	group_4	ENSG00000227486	RP13-188A5.1	Intron (ENST00000669152/ENSG00000227486, intron 2 of 2)	full_rescue	NA
chrX-56126001-56127000	-55.0193	group_3	ENSG00000227486	RP13-188A5.1	Intron (ENST00000669152/ENSG00000227486, intron 2 of 2)	full_rescue	NA
chrX-56068001-56069000	-33.1984	group_4	ENSG00000227486	RP13-188A5.1	Intron (ENST00000669152/ENSG00000227486, intron 2 of 2)	full_rescue	NA
chrX-56066001-56067000	-53.7037	group_4	ENSG00000227486	RP13-188A5.1	Intron (ENST00000669152/ENSG00000227486, intron 2 of 2)	full_rescue	NA
chrX-56063001-56064000	-62.5714	group_3	ENSG00000227486	RP13-188A5.1	Intron (ENST00000669152/ENSG00000227486, intron 2 of 2)	full_rescue	NA
chrX-56053001-56054000	-47.7941	group_3	ENSG00000227486	RP13-188A5.1	Intron (ENST00000669152/ENSG00000227486, intron 2 of 2)	full_rescue	NA
chrX-56026001-56027000	-53.2655	group_4	ENSG00000227486	RP13-188A5.1	Intron (ENST00000669152/ENSG00000227486, intron 2 of 2)	full_rescue	NA
chrX-56008001-56009000	-35.1449	group_4	ENSG00000227486	RP13-188A5.1	Intron (ENST00000452532/ENSG00000227486, intron 1 of 1)	partial_rescue	NA
chrX-55996001-55997000	-25.1537	group_4	ENSG00000227486	RP13-188A5.1	Intron (ENST00000452532/ENSG00000227486, intron 1 of 1)	full_rescue	NA
chrX-55955001-55956000	-44.4473	group_2	ENSG00000227486	RP13-188A5.1	Intron (ENST00000452532/ENSG00000227486, intron 1 of 1)	partial_rescue	NA
chrX-55943001-55944000	-41.9355	group_4	ENSG00000227486	RP13-188A5.1	Intron (ENST00000452532/ENSG00000227486, intron 1 of 1)	full_rescue	NA
chrX-55937001-55938000	-54.4138	group_3	ENSG00000227486	RP13-188A5.1	Intron (ENST00000452532/ENSG00000227486, intron 1 of 1)	full_rescue	NA
chrX-55936001-55937000	-47.619	group_3	ENSG00000227486	RP13-188A5.1	Intron (ENST00000452532/ENSG00000227486, intron 1 of 1)	full_rescue	NA
chrX-55924001-55925000	-32.0361	group_4	ENSG00000227486	RP13-188A5.1	Intron (ENST00000452532/ENSG00000227486, intron 1 of 1)	full_rescue	NA
chrX-55862001-55863000	-42.2231	group_4	ENSG00000227486	RP13-188A5.1	Distal Intergenic	full_rescue	NA
chrX-55850001-55851000	-41.9872	group_4	ENSG00000227486	RP13-188A5.1	Distal Intergenic	full_rescue	NA
chrX-55842001-55843000	-41.4103	group_3	ENSG00000227486	RP13-188A5.1	Distal Intergenic	full_rescue	NA
chrX-55792001-55793000	-28.31	group_3	ENSG00000083750	RRAGB	Distal Intergenic	full_rescue	NA
chrX-55791001-55792000	-31.7545	group_4	ENSG00000083750	RRAGB	Distal Intergenic	full_rescue	NA
chrX-55789001-55790000	-35.0411	group_4	ENSG00000083750	RRAGB	Distal Intergenic	full_rescue	NA
chrX-55773001-55774000	-28.8889	group_4	ENSG00000083750	RRAGB	Distal Intergenic	full_rescue	NA
chrX-55763001-55764000	-43.3962	group_4	ENSG00000083750	RRAGB	Distal Intergenic	partial_rescue	NA
chrX-55762001-55763000	-39.3888	group_3	ENSG00000083750	RRAGB	Distal Intergenic	full_rescue	NA
chrX-55690001-55691000	-52.7859	group_3	ENSG00000083750	RRAGB	Distal Intergenic	full_rescue	NA
chrX-55688001-55689000	-69.0562	group_3	ENSG00000083750	RRAGB	Distal Intergenic	full_rescue	NA
chrX-55659001-55660000	-52.8428	group_2	ENSG00000169164	RP11-167P23.2	Promoter (1-2kb)	full_rescue	NA
chrX-55658001-55659000	-47.9167	group_4	ENSG00000169164	RP11-167P23.2	Promoter (<=1kb)	full_rescue	NA
chrX-55593001-55594000	-36.5377	group_4	ENSG00000235136	RP13-146A14.1	Distal Intergenic	full_rescue	NA
chrX-55522001-55523000	-54.8077	group_3	ENSG00000277516	RP11-541G7.4	Promoter (1-2kb)	full_rescue	NA
chrX-55521001-55522000	-38.1622	group_3	ENSG00000277516	RP11-541G7.4	Promoter (<=1kb)	full_rescue	NA
chrX-55493001-55494000	-52.4194	group_3	ENSG00000247746	USP51	Distal Intergenic	full_rescue	NA
chrX-55389001-55390000	-49.4909	group_3	ENSG00000266328	hsa-mir-4536-1	Distal Intergenic	full_rescue	NA
chrX-55303001-55304000	-36.8131	group_3	ENSG00000232765	RP11-382F24.1	Distal Intergenic	full_rescue	NA
chrX-55277001-55278000	-47.8472	group_4	ENSG00000232765	RP11-382F24.1	Promoter (1-2kb)	full_rescue	NA
chrX-55273001-55274000	-37.0136	group_4	ENSG00000232765	RP11-382F24.1	Distal Intergenic	full_rescue	NA
chrX-55234001-55235000	-44.528	group_3	ENSG00000158639	PAGE5	Distal Intergenic	partial_rescue	NA
chrX-55207001-55208000	-41.2621	group_4	ENSG00000158639	PAGE5	Distal Intergenic	full_rescue	NA
chrX-55171001-55172000	-29.3649	group_4	ENSG00000186678	RP11-266I3.7	Promoter (<=1kb)	full_rescue	NA
chrX-55137001-55138000	-43.4033	group_3	ENSG00000276929	RP11-266I3.9	Promoter (<=1kb)	full_rescue	NA
chrX-55133001-55134000	-45.4545	group_1	ENSG00000276929	RP11-266I3.9	Distal Intergenic	full_rescue	NA
chrX-55098001-55099000	-37.3636	group_2	ENSG00000278319	RP11-266I3.8	Downstream (2-3kb)	full_rescue	NA
chrX-55073001-55074000	-39.3939	group_4	ENSG00000238269	PAGE2B	Promoter (1-2kb)	full_rescue	NA
chrX-55004001-55005000	-60	group_3	ENSG00000169188	APEX2	Intron (ENST00000374987/ENSG00000169188, intron 5 of 5)	full_rescue	GH_only
chrX-54952001-54953000	-48.7179	group_3	ENSG00000158571	PFKFB1	5' UTR	partial_rescue	NA
chrX-54894001-54895000	-27.6141	group_2	ENSG00000067445	TRO	Distal Intergenic	full_rescue	NA
chrX-54876001-54877000	-52.1482	group_4	ENSG00000275387	RP6-14C6.3	Distal Intergenic	full_rescue	NA
chrX-54825001-54826000	-42.4851	group_3	ENSG00000221716	SNORA11	Distal Intergenic	full_rescue	NA
chrX-54822001-54823000	-37.3903	group_4	ENSG00000221716	SNORA11	Distal Intergenic	full_rescue	NA
chrX-54816001-54817000	-27.2303	group_4	ENSG00000102316	MAGED2	3' UTR	full_rescue	NA
chrX-54810001-54811000	-36.5874	group_4	ENSG00000102316	MAGED2	Exon (ENST00000375053/ENSG00000102316, exon 3 of 12)	full_rescue	CGI_only
chrX-54786001-54787000	-40.5655	group_2	ENSG00000102313	ITIH6	Intron (ENST00000218436/ENSG00000102313, intron 5 of 12)	full_rescue	NA
chrX-54775001-54776000	-50.9359	group_4	ENSG00000102313	ITIH6	Intron (ENST00000218436/ENSG00000102313, intron 5 of 12)	full_rescue	NA
chrX-54757001-54758000	-26.4063	group_4	ENSG00000102313	ITIH6	Exon (ENST00000218436/ENSG00000102313, exon 8 of 13)	full_rescue	NA
chrX-54633001-54634000	-32.5865	group_4	ENSG00000215197	PGAM4P1	Distal Intergenic	full_rescue	NA
chrX-54596001-54597000	-56.1644	group_3	ENSG00000130119	GNL3L	Intron (ENST00000674498/ENSG00000130119, intron 16 of 16)	partial_rescue	NA
chrX-54586001-54587000	-40.5502	group_3	ENSG00000130119	GNL3L	Intron (ENST00000674498/ENSG00000130119, intron 16 of 16)	full_rescue	NA
chrX-54582001-54583000	-44.1595	group_4	ENSG00000130119	GNL3L	Intron (ENST00000674498/ENSG00000130119, intron 16 of 16)	full_rescue	NA
chrX-54575001-54576000	-36.5079	group_4	ENSG00000130119	GNL3L	Intron (ENST00000674498/ENSG00000130119, intron 16 of 16)	partial_rescue	NA
chrX-54562001-54563000	-27.9095	group_4	ENSG00000130119	GNL3L	3' UTR	full_rescue	NA
chrX-54558001-54559000	-25.4986	group_4	ENSG00000130119	GNL3L	3' UTR	full_rescue	NA
chrX-54554001-54555000	-50.3723	group_4	ENSG00000130119	GNL3L	3' UTR	full_rescue	NA
chrX-54552001-54553000	-68.4706	group_3	ENSG00000130119	GNL3L	3' UTR	full_rescue	NA
chrX-54551001-54552000	-32.7536	group_4	ENSG00000130119	GNL3L	3' UTR	partial_rescue	NA
chrX-54547001-54548000	-33.9806	group_4	ENSG00000130119	GNL3L	Intron (ENST00000674229/ENSG00000130119, intron 8 of 16)	full_rescue	NA
chrX-54505001-54506000	-33.0397	group_4	ENSG00000102302	FGD1	Distal Intergenic	full_rescue	NA
chrX-54504001-54505000	-28.3744	group_4	ENSG00000102302	FGD1	Distal Intergenic	full_rescue	NA
chrX-54499001-54500000	-28.2353	group_4	ENSG00000102302	FGD1	Distal Intergenic	full_rescue	NA
chrX-54498001-54499000	-29.8789	group_4	ENSG00000102302	FGD1	Promoter (1-2kb)	full_rescue	CGI_only
chrX-54494001-54495000	-26.8548	group_4	ENSG00000102302	FGD1	Intron (ENST00000375135/ENSG00000102302, intron 1 of 17)	partial_rescue	CGI_only
chrX-54493001-54494000	-32.3684	group_4	ENSG00000102302	FGD1	Intron (ENST00000375135/ENSG00000102302, intron 1 of 17)	partial_rescue	CGI_only
chrX-54490001-54491000	-39.6154	group_4	ENSG00000102302	FGD1	Intron (ENST00000375135/ENSG00000102302, intron 1 of 17)	full_rescue	NA
chrX-54487001-54488000	-33.6609	group_4	ENSG00000102302	FGD1	Intron (ENST00000375135/ENSG00000102302, intron 1 of 17)	partial_rescue	GH_only
chrX-54465001-54466000	-29.8942	group_4	ENSG00000102302	FGD1	Exon (ENST00000375135/ENSG00000102302, exon 7 of 18)	partial_rescue	NA
chrX-54432001-54433000	-31.7323	group_4	ENSG00000158526	TSR2	Distal Intergenic	full_rescue	NA
chrX-54431001-54432000	-32.2364	group_4	ENSG00000158526	TSR2	Distal Intergenic	full_rescue	NA
chrX-54429001-54430000	-25.5561	group_4	ENSG00000158526	TSR2	Distal Intergenic	partial_rescue	NA
chrX-54413001-54414000	-27.1845	group_4	ENSG00000158526	TSR2	Distal Intergenic	full_rescue	NA
chrX-54386001-54387000	-32.8354	group_4	ENSG00000196632	WNK3	Distal Intergenic	full_rescue	NA
chrX-54330001-54331000	-29.6296	group_4	ENSG00000196632	WNK3	Intron (ENST00000375169/ENSG00000196632, intron 2 of 22)	full_rescue	NA
chrX-54274001-54275000	-61.8723	group_3	ENSG00000196632	WNK3	Intron (ENST00000375169/ENSG00000196632, intron 10 of 22)	full_rescue	NA
chrX-54264001-54265000	-63.7931	group_3	ENSG00000196632	WNK3	Intron (ENST00000375169/ENSG00000196632, intron 10 of 22)	full_rescue	NA
chrX-54181001-54182000	-44.7771	group_3	ENSG00000184083	FAM120C	Intron (ENST00000375180/ENSG00000184083, intron 1 of 15)	full_rescue	CGI_and_GH
chrX-54133001-54134000	-53.3333	group_4	ENSG00000184083	FAM120C	Exon (ENST00000375180/ENSG00000184083, exon 8 of 16)	full_rescue	NA
chrX-54124001-54125000	-47.724	group_3	ENSG00000184083	FAM120C	Intron (ENST00000375180/ENSG00000184083, intron 9 of 15)	full_rescue	NA
chrX-54092001-54093000	-33.1032	group_4	ENSG00000184083	FAM120C	Intron (ENST00000375180/ENSG00000184083, intron 10 of 15)	full_rescue	NA
chrX-54091001-54092000	-37.8788	group_3	ENSG00000184083	FAM120C	Exon (ENST00000375180/ENSG00000184083, exon 11 of 16)	full_rescue	NA
chrX-54052001-54053000	-52.381	group_4	ENSG00000172943	PHF8	Distal Intergenic	full_rescue	NA
chrX-54029001-54030000	-38.6897	group_4	ENSG00000172943	PHF8	Intron (ENST00000357988/ENSG00000172943, intron 2 of 21)	full_rescue	NA
chrX-54028001-54029000	-33.5959	group_4	ENSG00000172943	PHF8	Intron (ENST00000357988/ENSG00000172943, intron 2 of 21)	full_rescue	NA
chrX-53937001-53938000	-30.2194	group_4	ENSG00000172943	PHF8	3' UTR	full_rescue	NA
chrX-53929001-53930000	-38.6667	group_4	ENSG00000201618	RNA5SP505	Distal Intergenic	full_rescue	NA
chrX-53913001-53914000	-46.4286	group_4	ENSG00000201618	RNA5SP505	Distal Intergenic	full_rescue	NA
chrX-53860001-53861000	-44.2348	group_4	ENSG00000235916	RP13-444K19.1	Distal Intergenic	full_rescue	NA
chrX-53813001-53814000	-26.0976	group_4	ENSG00000229037	RP11-272G22.3	Distal Intergenic	full_rescue	NA
chrX-53756001-53757000	-32.0403	group_4	ENSG00000224735	RP11-272G22.1	Distal Intergenic	full_rescue	NA
chrX-53724001-53725000	-33.3703	group_4	ENSG00000224735	RP11-272G22.1	Distal Intergenic	full_rescue	NA
chrX-53719001-53720000	-30.9524	group_4	ENSG00000086758	HUWE1	Distal Intergenic	full_rescue	GH_only
chrX-53708001-53709000	-31.5789	group_4	ENSG00000086758	HUWE1	Distal Intergenic	full_rescue	NA
chrX-53701001-53702000	-63.6364	group_3	ENSG00000086758	HUWE1	Distal Intergenic	partial_rescue	NA
chrX-53696001-53697000	-38.1573	group_3	ENSG00000086758	HUWE1	Distal Intergenic	full_rescue	NA
chrX-53663001-53664000	-25.1354	group_4	ENSG00000086758	HUWE1	Intron (ENST00000342160/ENSG00000086758, intron 2 of 82)	full_rescue	NA
chrX-53623001-53624000	-27.8478	group_4	ENSG00000086758	HUWE1	Intron (ENST00000612484/ENSG00000086758, intron 16 of 80)	full_rescue	NA
chrX-53619001-53620000	-34.7826	group_4	ENSG00000086758	HUWE1	Intron (ENST00000612484/ENSG00000086758, intron 16 of 80)	full_rescue	NA
chrX-53593001-53594000	-28.5714	group_4	ENSG00000086758	HUWE1	Exon (ENST00000612484/ENSG00000086758, exon 29 of 81)	full_rescue	NA
chrX-53562001-53563000	-33.6999	group_4	ENSG00000086758	HUWE1	Exon (ENST00000612484/ENSG00000086758, exon 50 of 81)	full_rescue	NA
chrX-53558001-53559000	-32.2858	group_4	ENSG00000086758	HUWE1	Exon (ENST00000612484/ENSG00000086758, exon 55 of 81)	partial_rescue	NA
chrX-53551001-53552000	-27.4936	group_4	ENSG00000086758	HUWE1	Exon (ENST00000612484/ENSG00000086758, exon 61 of 81)	full_rescue	NA
chrX-53549001-53550000	-47.7612	group_4	ENSG00000086758	HUWE1	Exon (ENST00000426907/ENSG00000086758, exon 1 of 18)	full_rescue	NA
chrX-53534001-53535000	-43.8928	group_4	ENSG00000086758	HUWE1	Exon (ENST00000426907/ENSG00000086758, exon 16 of 18)	partial_rescue	NA
chrX-53533001-53534000	-35.2989	group_3	ENSG00000086758	HUWE1	3' UTR	full_rescue	NA
chrX-53499001-53500000	-50	group_3	ENSG00000199422	VTRNA3-1P	Distal Intergenic	partial_rescue	NA
chrX-53497001-53498000	-29.6296	group_4	ENSG00000199422	VTRNA3-1P	Distal Intergenic	full_rescue	NA
chrX-53486001-53487000	-52	group_3	ENSG00000199422	VTRNA3-1P	Distal Intergenic	partial_rescue	NA
chrX-53483001-53484000	-31.875	group_4	ENSG00000199422	VTRNA3-1P	Distal Intergenic	full_rescue	NA
chrX-53479001-53480000	-33.0657	group_4	ENSG00000199422	VTRNA3-1P	Distal Intergenic	full_rescue	NA
chrX-53478001-53479000	-40	group_4	ENSG00000199422	VTRNA3-1P	Distal Intergenic	full_rescue	NA
chrX-53473001-53474000	-42.8631	group_4	ENSG00000199422	VTRNA3-1P	Distal Intergenic	full_rescue	NA
chrX-53470001-53471000	-33.3816	group_4	ENSG00000199422	VTRNA3-1P	Distal Intergenic	full_rescue	NA
chrX-53467001-53468000	-36.7347	group_4	ENSG00000199422	VTRNA3-1P	Distal Intergenic	full_rescue	NA
chrX-53455001-53456000	-38.5542	group_4	ENSG00000235416	RP3-339A18.3	Downstream (<1kb)	full_rescue	NA
chrX-53451001-53452000	-41.7448	group_4	ENSG00000235416	RP3-339A18.3	Distal Intergenic	full_rescue	NA
chrX-53440001-53441000	-85.7143	group_1	ENSG00000072506	HSD17B10	Distal Intergenic	no_rescue	CGI_and_GH
chrX-53425001-53426000	-25.6098	group_4	ENSG00000158423	RIBC1	Intron (ENST00000329209/ENSG00000158423, intron 2 of 4)	partial_rescue	GH_only
chrX-53418001-53419000	-29.5775	group_4	ENSG00000072501	SMC1A	Intron (ENST00000675504/ENSG00000072501, intron 1 of 24)	full_rescue	GH_only
chrX-53366001-53367000	-38.4553	group_4	ENSG00000234413	RP6-29D12.2	Distal Intergenic	full_rescue	NA
chrX-53356001-53357000	-35.4062	group_3	ENSG00000234413	RP6-29D12.2	Distal Intergenic	full_rescue	NA
chrX-53339001-53340000	-62.5	group_2	ENSG00000234413	RP6-29D12.2	Promoter (<=1kb)	partial_rescue	NA
chrX-53331001-53332000	-57.8947	group_4	ENSG00000236571	RP6-29D12.3	Distal Intergenic	partial_rescue	NA
chrX-53330001-53331000	-37.8754	group_4	ENSG00000207408	Y_RNA	Distal Intergenic	full_rescue	NA
chrX-53326001-53327000	-31.1434	group_4	ENSG00000207408	Y_RNA	Distal Intergenic	full_rescue	NA
chrX-53297001-53298000	-28.2639	group_4	ENSG00000124313	IQSEC2	Intron (ENST00000640694/ENSG00000124313, intron 1 of 13)	full_rescue	NA
chrX-53296001-53297000	-32.8804	group_4	ENSG00000124313	IQSEC2	Intron (ENST00000640694/ENSG00000124313, intron 1 of 13)	full_rescue	NA
chrX-53290001-53291000	-52.924	group_3	ENSG00000124313	IQSEC2	Intron (ENST00000640694/ENSG00000124313, intron 2 of 13)	partial_rescue	NA
chrX-53289001-53290000	-28.3013	group_3	ENSG00000124313	IQSEC2	Intron (ENST00000640694/ENSG00000124313, intron 2 of 13)	full_rescue	NA
chrX-53285001-53286000	-46.6783	group_3	ENSG00000124313	IQSEC2	Intron (ENST00000640694/ENSG00000124313, intron 2 of 13)	full_rescue	GH_only
chrX-53284001-53285000	-40.9938	group_2	ENSG00000124313	IQSEC2	Intron (ENST00000640694/ENSG00000124313, intron 2 of 13)	full_rescue	GH_only
chrX-53280001-53281000	-31.6656	group_3	ENSG00000124313	IQSEC2	Intron (ENST00000640694/ENSG00000124313, intron 2 of 13)	full_rescue	GH_only
chrX-53279001-53280000	-34.5757	group_4	ENSG00000124313	IQSEC2	Exon (ENST00000375365/ENSG00000124313, exon 2 of 14)	full_rescue	GH_only
chrX-53268001-53269000	-29.4082	group_4	ENSG00000124313	IQSEC2	Intron (ENST00000640694/ENSG00000124313, intron 2 of 13)	full_rescue	GH_only
chrX-53257001-53258000	-29.6963	group_3	ENSG00000124313	IQSEC2	Intron (ENST00000640694/ENSG00000124313, intron 2 of 13)	full_rescue	NA
chrX-53256001-53257000	-42.1413	group_2	ENSG00000124313	IQSEC2	Exon (ENST00000640694/ENSG00000124313, exon 3 of 14)	partial_rescue	CGI_only
chrX-53239001-53240000	-25.5735	group_4	ENSG00000124313	IQSEC2	Exon (ENST00000638869/ENSG00000124313, exon 5 of 9)	full_rescue	NA
chrX-53237001-53238000	-37.1429	group_4	ENSG00000124313	IQSEC2	3' UTR	full_rescue	NA
chrX-53230001-53231000	-32.2917	group_3	ENSG00000124313	IQSEC2	3' UTR	full_rescue	NA
chrX-53228001-53229000	-35.3682	group_4	ENSG00000124313	IQSEC2	3' UTR	full_rescue	GH_only
chrX-53147001-53148000	-35.6028	group_3	ENSG00000232593	KANTR	Intron (ENST00000603385/ENSG00000232593, intron 3 of 3)	full_rescue	NA
chrX-53123001-53124000	-51.4337	group_3	ENSG00000232593	KANTR	5' UTR	full_rescue	NA
chrX-53037001-53038000	-36.4253	group_4	ENSG00000184194	GPR173	Distal Intergenic	full_rescue	NA
chrX-53021001-53022000	-30.2795	group_4	ENSG00000268350	FAM156A	Distal Intergenic	no_rescue	NA
chrX-53000001-53001000	-28.9039	group_4	ENSG00000268350	FAM156A	Distal Intergenic	full_rescue	CGI_only
chrX-52979001-52980000	-26.9192	group_3	ENSG00000268350	FAM156A	Intron (ENST00000611661/ENSG00000268350, intron 1 of 2)	full_rescue	GH_only
chrX-52926001-52927000	-62.3656	group_3	ENSG00000286118	NA	Promoter (<=1kb)	full_rescue	NA
chrX-52869001-52870000	-45.3166	group_3	ENSG00000171402	XAGE3	Promoter (<=1kb)	full_rescue	NA
chrX-52852001-52853000	-53.4483	group_4	ENSG00000171402	XAGE3	Distal Intergenic	full_rescue	NA
chrX-52832001-52833000	-66.0279	group_3	ENSG00000224781	EIF4A2P4	Promoter (<=1kb)	full_rescue	NA
chrX-52829001-52830000	-34.7799	group_4	ENSG00000196395	RP13-77O11.11	Promoter (<=1kb)	full_rescue	NA
chrX-52827001-52828000	-39.5363	group_4	ENSG00000196395	RP13-77O11.11	Intron (ENST00000502642/ENSG00000196395, intron 2 of 2)	full_rescue	NA
chrX-52805001-52806000	-47.0007	group_3	ENSG00000229885	RP13-77O11.12	Distal Intergenic	full_rescue	NA
chrX-52789001-52790000	-41.5385	group_3	ENSG00000268447	SSX2B	3' UTR	partial_rescue	NA
chrX-52666001-52667000	-34.5056	group_4	ENSG00000222608	RNA5SP504	Promoter (<=1kb)	full_rescue	NA
chrX-52663001-52664000	-38.2272	group_4	ENSG00000222608	RNA5SP504	Promoter (1-2kb)	full_rescue	NA
chrX-52654001-52655000	-66.6667	group_3	ENSG00000187754	SSX7	Promoter (<=1kb)	partial_rescue	NA
chrX-52653001-52654000	-32.0346	group_3	ENSG00000187754	SSX7	Promoter (<=1kb)	partial_rescue	NA
chrX-52652001-52653000	-47.7273	group_4	ENSG00000187754	SSX7	Exon (ENST00000298181/ENSG00000187754, exon 3 of 8)	partial_rescue	NA
chrX-52634001-52635000	-43.4783	group_3	ENSG00000157965	SSX8	Distal Intergenic	partial_rescue	NA
chrX-52617001-52618000	-63.6364	group_4	ENSG00000234792	RP11-552J9.6	Distal Intergenic	full_rescue	NA
chrX-52611001-52612000	-48.1481	group_4	ENSG00000197185	SSXP1	Promoter (<=1kb)	full_rescue	NA
chrX-52604001-52605000	-33.7662	group_4	ENSG00000185319	SSXP4	Downstream (1-2kb)	no_rescue	NA
chrX-52582001-52583000	-27.4419	group_4	ENSG00000228771	RP11-552J9.1	Promoter (<=1kb)	full_rescue	NA
chrX-52572001-52573000	-32.9565	group_4	ENSG00000231593	RP13-34L8.8	Distal Intergenic	full_rescue	NA
chrX-52566001-52567000	-51.2821	group_4	ENSG00000231593	RP13-34L8.8	Distal Intergenic	full_rescue	NA
chrX-52551001-52552000	-44.0926	group_4	ENSG00000227058	RP13-34L8.7	Distal Intergenic	full_rescue	NA
chrX-52550001-52551000	-41.1765	group_4	ENSG00000227058	RP13-34L8.7	Distal Intergenic	full_rescue	NA
chrX-52510001-52511000	-25.8721	group_4	ENSG00000223395	RBM22P7	Promoter (<=1kb)	full_rescue	NA
chrX-52455001-52456000	-46.6667	group_4	ENSG00000224556	RP11-485B17.3	Intron (ENST00000456973/ENSG00000224556, intron 1 of 1)	full_rescue	NA
chrX-52417001-52418000	-26.3545	group_4	ENSG00000224556	RP11-485B17.3	Distal Intergenic	full_rescue	NA
chrX-52369001-52370000	-33.8266	group_4	ENSG00000155622	XAGE2	Promoter (<=1kb)	full_rescue	NA
chrX-5236001-5237000	-37.7451	group_4	ENSG00000226313	MTCYBP12	Distal Intergenic	full_rescue	NA
chrX-52335001-52336000	-65.6085	group_3	ENSG00000275335	MIR8088	Promoter (<=1kb)	partial_rescue	NA
chrX-52304001-52305000	-39.2157	group_4	ENSG00000276474	RP11-363G10.3	Distal Intergenic	partial_rescue	NA
chrX-52292001-52293000	-28.0914	group_4	ENSG00000287215	NA	Distal Intergenic	full_rescue	NA
chrX-52288001-52289000	-57.5758	group_3	ENSG00000287215	NA	Distal Intergenic	full_rescue	NA
chrX-52284001-52285000	-38.1142	group_4	ENSG00000287215	NA	Distal Intergenic	full_rescue	NA
chrX-52263001-52264000	-48.0159	group_4	ENSG00000287215	NA	Intron (ENST00000669760/ENSG00000287215, intron 1 of 2)	full_rescue	CGI_only
chrX-52171001-52172000	-25.2196	group_4	ENSG00000154545	MAGED4	Distal Intergenic	partial_rescue	NA
chrX-52169001-52170000	-37.9798	group_3	ENSG00000154545	MAGED4	Distal Intergenic	full_rescue	NA
chrX-52119001-52120000	-39.0029	group_4	ENSG00000187243	MAGED4B	Distal Intergenic	full_rescue	NA
chrX-51997001-51998000	-36.6288	group_4	ENSG00000232562	TPMTP3	Distal Intergenic	full_rescue	NA
chrX-51929001-51930000	-61.3889	group_3	ENSG00000237528	RP11-234P3.4	Distal Intergenic	full_rescue	NA
chrX-51926001-51927000	-34.3722	group_4	ENSG00000237528	RP11-234P3.4	Distal Intergenic	full_rescue	NA
chrX-51904001-51905000	-32.9406	group_4	ENSG00000228827	RP11-234P3.2	Promoter (<=1kb)	full_rescue	NA
chrX-51881001-51882000	-34.3915	group_4	ENSG00000179222	MAGED1	Intron (ENST00000375772/ENSG00000179222, intron 1 of 12)	full_rescue	NA
chrX-51874001-51875000	-35.7143	group_4	ENSG00000179222	MAGED1	Intron (ENST00000375772/ENSG00000179222, intron 1 of 12)	full_rescue	NA
chrX-51869001-51870000	-48.3333	group_3	ENSG00000179222	MAGED1	Intron (ENST00000375772/ENSG00000179222, intron 1 of 12)	full_rescue	NA
chrX-51768001-51769000	-44.0678	group_3	ENSG00000189369	GSPT2	Distal Intergenic	no_rescue	NA
chrX-517001-518000	-27.237	group_3	ENSG00000234958	FABP5P13	Distal Intergenic	full_rescue	NA
chrX-51695001-51696000	-41.2809	group_4	ENSG00000283093	CENPVL2	Distal Intergenic	full_rescue	NA
chrX-51694001-51695000	-35.4839	group_4	ENSG00000283093	CENPVL2	Distal Intergenic	full_rescue	NA
chrX-51649001-51650000	-61.7424	group_3	ENSG00000224109	CENPVL3	Distal Intergenic	full_rescue	NA
chrX-51645001-51646000	-27.3488	group_3	ENSG00000224109	CENPVL3	Distal Intergenic	full_rescue	NA
chrX-51625001-51626000	-54.8387	group_4	ENSG00000224109	CENPVL3	Distal Intergenic	full_rescue	NA
chrX-51549001-51550000	-28.1977	group_4	ENSG00000234766	LINC01496	Distal Intergenic	full_rescue	NA
chrX-51537001-51538000	-30.405	group_4	ENSG00000234766	LINC01496	Distal Intergenic	full_rescue	NA
chrX-51517001-51518000	-30.5556	group_4	ENSG00000234766	LINC01496	Distal Intergenic	full_rescue	NA
chrX-51441001-51442000	-41.5119	group_3	ENSG00000226530	RP11-348F1.2	Intron (ENST00000455931/ENSG00000226530, intron 1 of 1)	full_rescue	NA
chrX-51236001-51237000	-32.1568	group_4	ENSG00000229151	RP11-348F1.3	Intron (ENST00000425150/ENSG00000229151, intron 6 of 8)	partial_rescue	NA
chrX-51231001-51232000	-55.8974	group_3	ENSG00000229151	RP11-348F1.3	Intron (ENST00000425150/ENSG00000229151, intron 6 of 8)	full_rescue	NA
chrX-51219001-51220000	-59.2672	group_2	ENSG00000230317	LINC01284	Intron (ENST00000665808/ENSG00000230317, intron 1 of 4)	partial_rescue	NA
chrX-51175001-51176000	-45.1617	group_4	ENSG00000230317	LINC01284	Intron (ENST00000665808/ENSG00000230317, intron 2 of 4)	full_rescue	NA
chrX-51163001-51164000	-59.0164	group_4	ENSG00000230317	LINC01284	Exon (ENST00000428996/ENSG00000237926, exon 1 of 1)	partial_rescue	NA
chrX-51125001-51126000	-32.0743	group_3	ENSG00000230317	LINC01284	Intron (ENST00000442994/ENSG00000230317, intron 1 of 8)	full_rescue	NA
chrX-51124001-51125000	-55.8824	group_4	ENSG00000230317	LINC01284	Exon (ENST00000666173/ENSG00000230317, exon 1 of 7)	full_rescue	NA
chrX-51096001-51097000	-32.6923	group_4	ENSG00000230317	LINC01284	Intron (ENST00000659896/ENSG00000230317, intron 4 of 4)	full_rescue	NA
chrX-51068001-51069000	-28.555	group_3	ENSG00000230926	RP11-104D21.2	Distal Intergenic	partial_rescue	NA
chrX-51025001-51026000	-42.8887	group_3	ENSG00000227493	RP11-104D21.1	Distal Intergenic	full_rescue	NA
chrX-51024001-51025000	-51.6412	group_2	ENSG00000227493	RP11-104D21.1	Distal Intergenic	partial_rescue	NA
chrX-51011001-51012000	-45.1852	group_3	ENSG00000227493	RP11-104D21.1	Distal Intergenic	full_rescue	NA
chrX-50965001-50966000	-37.9127	group_4	ENSG00000238190	HMGB1P15	Distal Intergenic	full_rescue	NA
chrX-50939001-50940000	-51.2281	group_4	ENSG00000238190	HMGB1P15	Distal Intergenic	full_rescue	NA
chrX-50877001-50878000	-29.5455	group_4	ENSG00000226881	H3F3AP5	Distal Intergenic	full_rescue	NA
chrX-50849001-50850000	-34.2857	group_4	ENSG00000158352	SHROOM4	Distal Intergenic	full_rescue	NA
chrX-50815001-50816000	-48.3316	group_3	ENSG00000158352	SHROOM4	Promoter (<=1kb)	full_rescue	CGI_and_GH
chrX-50810001-50811000	-48.3333	group_4	ENSG00000158352	SHROOM4	Intron (ENST00000376020/ENSG00000158352, intron 1 of 8)	full_rescue	GH_only
chrX-50797001-50798000	-50.6707	group_2	ENSG00000158352	SHROOM4	Intron (ENST00000376020/ENSG00000158352, intron 1 of 8)	full_rescue	GH_only
chrX-50776001-50777000	-60	group_4	ENSG00000158352	SHROOM4	Intron (ENST00000376020/ENSG00000158352, intron 1 of 8)	full_rescue	NA
chrX-50766001-50767000	-44.1176	group_3	ENSG00000158352	SHROOM4	Intron (ENST00000376020/ENSG00000158352, intron 1 of 8)	partial_rescue	GH_only
chrX-50765001-50766000	-41.5094	group_4	ENSG00000158352	SHROOM4	Intron (ENST00000376020/ENSG00000158352, intron 1 of 8)	full_rescue	GH_only
chrX-50708001-50709000	-57.4124	group_3	ENSG00000158352	SHROOM4	Intron (ENST00000376020/ENSG00000158352, intron 1 of 8)	full_rescue	NA
chrX-50680001-50681000	-40.7143	group_4	ENSG00000158352	SHROOM4	Intron (ENST00000376020/ENSG00000158352, intron 2 of 8)	full_rescue	NA
chrX-50669001-50670000	-53.8462	group_3	ENSG00000158352	SHROOM4	Intron (ENST00000376020/ENSG00000158352, intron 2 of 8)	partial_rescue	NA
chrX-50564001-50565000	-34.6667	group_4	ENSG00000222303	RNU6-935P	Distal Intergenic	full_rescue	NA
chrX-50536001-50537000	-32.2561	group_3	ENSG00000274588	DGKK	Distal Intergenic	partial_rescue	NA
chrX-50534001-50535000	-28.4341	group_4	ENSG00000274588	DGKK	Distal Intergenic	partial_rescue	NA
chrX-50526001-50527000	-28.8462	group_3	ENSG00000274588	DGKK	Distal Intergenic	partial_rescue	NA
chrX-50515001-50516000	-32.6486	group_4	ENSG00000274588	DGKK	Distal Intergenic	full_rescue	NA
chrX-50504001-50505000	-42.1509	group_3	ENSG00000274588	DGKK	Distal Intergenic	partial_rescue	NA
chrX-50428001-50429000	-58.8889	group_3	ENSG00000274588	DGKK	Intron (ENST00000611977/ENSG00000274588, intron 1 of 27)	full_rescue	NA
chrX-50404001-50405000	-37.2916	group_3	ENSG00000274588	DGKK	Exon (ENST00000611977/ENSG00000274588, exon 5 of 28)	full_rescue	NA
chrX-50375001-50376000	-28.9502	group_4	ENSG00000274588	DGKK	Exon (ENST00000611977/ENSG00000274588, exon 25 of 28)	full_rescue	NA
chrX-50359001-50360000	-37.3834	group_3	ENSG00000274588	DGKK	Distal Intergenic	partial_rescue	NA
chrX-50337001-50338000	-39.3382	group_4	ENSG00000147082	CCNB3	Intron (ENST00000376042/ENSG00000147082, intron 8 of 12)	full_rescue	NA
chrX-50336001-50337000	-32.4309	group_4	ENSG00000147082	CCNB3	Intron (ENST00000376042/ENSG00000147082, intron 8 of 12)	full_rescue	NA
chrX-50302001-50303000	-38.4615	group_4	ENSG00000147082	CCNB3	Intron (ENST00000376042/ENSG00000147082, intron 5 of 12)	full_rescue	NA
chrX-50301001-50302000	-25.1926	group_4	ENSG00000147082	CCNB3	Intron (ENST00000376042/ENSG00000147082, intron 5 of 12)	full_rescue	NA
chrX-50286001-50287000	-29.7354	group_4	ENSG00000147082	CCNB3	Intron (ENST00000376042/ENSG00000147082, intron 3 of 12)	full_rescue	NA
chrX-50225001-50226000	-60.3723	group_4	ENSG00000147082	CCNB3	Intron (ENST00000493507/ENSG00000147082, intron 2 of 3)	full_rescue	NA
chrX-50180001-50181000	-63.5897	group_3	ENSG00000202495	Y_RNA	Distal Intergenic	full_rescue	NA
chrX-50135001-50136000	-57.3099	group_3	ENSG00000181977	PYY3	Distal Intergenic	full_rescue	NA
chrX-50011001-50012000	-27.6596	group_4	ENSG00000171365	CLCN5	Intron (ENST00000376091/ENSG00000171365, intron 3 of 14)	full_rescue	NA
chrX-500001-501000	-42.1438	group_1	ENSG00000234958	FABP5P13	Distal Intergenic	partial_rescue	CGI_only
chrX-50000001-50001000	-40.8904	group_4	ENSG00000171365	CLCN5	Intron (ENST00000376091/ENSG00000171365, intron 3 of 14)	full_rescue	NA
chrX-49988001-49989000	-29.8654	group_3	ENSG00000171365	CLCN5	Intron (ENST00000376091/ENSG00000171365, intron 3 of 14)	full_rescue	NA
chrX-49963001-49964000	-67.8322	group_2	ENSG00000171365	CLCN5	Intron (ENST00000376091/ENSG00000171365, intron 3 of 14)	partial_rescue	GH_only
chrX-49853001-49854000	-36.5419	group_4	ENSG00000101951	PAGE4	Distal Intergenic	full_rescue	NA
chrX-49807001-49808000	-39.7436	group_4	ENSG00000101951	PAGE4	Distal Intergenic	full_rescue	NA
chrX-49792001-49793000	-32.381	group_4	ENSG00000101951	PAGE4	Distal Intergenic	full_rescue	NA
chrX-49790001-49791000	-72.982	group_3	ENSG00000101951	PAGE4	Distal Intergenic	full_rescue	NA
chrX-49789001-49790000	-40.2816	group_3	ENSG00000101951	PAGE4	Distal Intergenic	full_rescue	NA
chrX-49787001-49788000	-59.2593	group_3	ENSG00000101951	PAGE4	Distal Intergenic	full_rescue	NA
chrX-49728001-49729000	-46.0548	group_2	ENSG00000068985	PAGE1	Distal Intergenic	full_rescue	NA
chrX-49716001-49717000	-34.1085	group_4	ENSG00000068985	PAGE1	Distal Intergenic	full_rescue	NA
chrX-497001-498000	-36.8989	group_2	ENSG00000234958	FABP5P13	Distal Intergenic	partial_rescue	CGI_only
chrX-49665001-49666000	-39.1097	group_4	ENSG00000227391	SALL1P1	Exon (ENST00000438101/ENSG00000227391, exon 1 of 1)	full_rescue	NA
chrX-49644001-49645000	-36.2804	group_4	ENSG00000213856	VDAC1P2	Distal Intergenic	partial_rescue	NA
chrX-49627001-49628000	-71.9277	group_2	ENSG00000213856	VDAC1P2	Distal Intergenic	no_rescue	NA
chrX-49624001-49625000	-47.0588	group_4	ENSG00000213856	VDAC1P2	Distal Intergenic	full_rescue	NA
chrX-49589001-49590000	-25.5	group_4	ENSG00000189064	GAGE2A	Promoter (<=1kb)	full_rescue	CGI_only
chrX-49341001-49342000	-37.1472	group_4	ENSG00000275113	GAGE2E	Promoter (<=1kb)	full_rescue	CGI_only
chrX-49312001-49313000	-26.8885	group_4	ENSG00000215274	GAGE10	Intron (ENST00000407599/ENSG00000215274, intron 3 of 4)	full_rescue	NA
chrX-49282001-49283000	-28.4336	group_2	ENSG00000049769	PPP1R3F	Exon (ENST00000055335/ENSG00000049769, exon 3 of 4)	partial_rescue	GH_only
chrX-49280001-49281000	-41.9355	group_4	ENSG00000049769	PPP1R3F	5' UTR	full_rescue	GH_only
chrX-49275001-49276000	-29.0429	group_3	ENSG00000049769	PPP1R3F	Exon (ENST00000602455/ENSG00000270012, exon 1 of 1)	full_rescue	NA
chrX-49267001-49268000	-43.4746	group_3	ENSG00000049768	FOXP3	Intron (ENST00000650877/ENSG00000049768, intron 1 of 3)	partial_rescue	CGI_only
chrX-49257001-49258000	-47.5556	group_4	ENSG00000049768	FOXP3	Exon (ENST00000376207/ENSG00000049768, exon 3 of 12)	full_rescue	NA
chrX-49252001-49253000	-27.2579	group_4	ENSG00000049768	FOXP3	Intron (ENST00000376207/ENSG00000049768, intron 10 of 11)	full_rescue	NA
chrX-49239001-49240000	-58.8692	group_4	ENSG00000101997	CCDC22	Intron (ENST00000376227/ENSG00000101997, intron 2 of 16)	full_rescue	GH_only
chrX-49234001-49235000	-44.5878	group_3	ENSG00000230216	HSPB1P2	Promoter (<=1kb)	full_rescue	CGI_and_GH
chrX-49231001-49232000	-31.9141	group_3	ENSG00000102001	CACNA1F	Exon (ENST00000376251/ENSG00000102001, exon 2 of 48)	full_rescue	CGI_and_GH
chrX-49228001-49229000	-28.1548	group_3	ENSG00000102001	CACNA1F	Exon (ENST00000376251/ENSG00000102001, exon 7 of 48)	full_rescue	CGI_and_GH
chrX-49226001-49227000	-31.4394	group_4	ENSG00000102001	CACNA1F	Exon (ENST00000376251/ENSG00000102001, exon 9 of 48)	full_rescue	GH_only
chrX-49221001-49222000	-29.6636	group_4	ENSG00000102001	CACNA1F	Exon (ENST00000376251/ENSG00000102001, exon 18 of 48)	full_rescue	NA
chrX-49215001-49216000	-40.7503	group_4	ENSG00000102001	CACNA1F	Exon (ENST00000376251/ENSG00000102001, exon 28 of 48)	full_rescue	NA
chrX-49210001-49211000	-39.1892	group_3	ENSG00000102001	CACNA1F	Exon (ENST00000376251/ENSG00000102001, exon 37 of 48)	full_rescue	NA
chrX-49204001-49205000	-25.8407	group_3	ENSG00000102003	SYP	Downstream (<1kb)	full_rescue	NA
chrX-49189001-49190000	-41.1111	group_4	ENSG00000102003	SYP	3' UTR	partial_rescue	CGI_and_GH
chrX-49182001-49183000	-27.2375	group_4	ENSG00000012211	PRICKLE3	Intron (ENST00000599218/ENSG00000012211, intron 3 of 8)	full_rescue	NA
chrX-49170001-49171000	-25.5242	group_4	ENSG00000102007	PLP2	Promoter (<=1kb)	full_rescue	CGI_and_GH
chrX-49165001-49166000	-27.4007	group_4	ENSG00000279422	RP11-641J8.1	Promoter (<=1kb)	full_rescue	CGI_and_GH
chrX-49149001-49150000	-43.6828	group_4	ENSG00000265033	RN7SL262P	Distal Intergenic	full_rescue	GH_only
chrX-49138001-49139000	-35.556	group_4	ENSG00000265033	RN7SL262P	Distal Intergenic	full_rescue	NA
chrX-49122001-49123000	-36.4146	group_4	ENSG00000068394	GPKOW	Promoter (<=1kb)	full_rescue	CGI_only
chrX-49114001-49115000	-47.8261	group_4	ENSG00000068394	GPKOW	Intron (ENST00000156109/ENSG00000068394, intron 9 of 10)	full_rescue	NA
chrX-49087001-49088000	-41.4141	group_4	ENSG00000196998	WDR45	Intron (ENST00000356463/ENSG00000196998, intron 2 of 11)	partial_rescue	NA
chrX-49076001-49077000	-35.2113	group_4	ENSG00000288053	NA	3' UTR	full_rescue	CGI_and_GH
chrX-49072001-49073000	-50.724	group_2	ENSG00000243279	PRAF2	3' UTR	no_rescue	CGI_only
chrX-49071001-49072000	-43.4921	group_3	ENSG00000243279	PRAF2	3' UTR	no_rescue	CGI_only
chrX-49068001-49069000	-27.5377	group_4	ENSG00000147144	CCDC120	3' UTR	full_rescue	NA
chrX-49056001-49057000	-33.9166	group_4	ENSG00000147144	CCDC120	Intron (ENST00000597275/ENSG00000147144, intron 1 of 9)	full_rescue	NA
chrX-49054001-49055000	-28.8607	group_3	ENSG00000147144	CCDC120	Promoter (<=1kb)	full_rescue	CGI_only
chrX-49052001-49053000	-25.1718	group_4	ENSG00000147144	CCDC120	Promoter (<=1kb)	full_rescue	CGI_only
chrX-49046001-49047000	-38.8079	group_4	ENSG00000068323	TFE3	Distal Intergenic	full_rescue	GH_only
chrX-49034001-49035000	-33.0607	group_4	ENSG00000068323	TFE3	3' UTR	full_rescue	GH_only
chrX-48988001-48989000	-37.8205	group_4	ENSG00000068400	GRIPAP1	Exon (ENST00000593475/ENSG00000068400, exon 12 of 25)	full_rescue	NA
chrX-48981001-48982000	-29.2447	group_4	ENSG00000068400	GRIPAP1	Exon (ENST00000619149/ENSG00000068400, exon 6 of 12)	full_rescue	NA
chrX-48963001-48964000	-41.3793	group_4	ENSG00000102057	KCND1	Intron (ENST00000376477/ENSG00000102057, intron 4 of 4)	partial_rescue	GH_only
chrX-48953001-48954000	-62.963	group_3	ENSG00000068308	OTUD5	Intron (ENST00000376488/ENSG00000068308, intron 1 of 8)	full_rescue	GH_only
chrX-48947001-48948000	-33.9694	group_4	ENSG00000068308	OTUD5	Intron (ENST00000376488/ENSG00000068308, intron 1 of 8)	full_rescue	NA
chrX-48937001-48938000	-25.39	group_2	ENSG00000068308	OTUD5	Intron (ENST00000376488/ENSG00000068308, intron 2 of 8)	full_rescue	GH_only
chrX-48914001-48915000	-41.8656	group_4	ENSG00000102096	PIM2	3' UTR	full_rescue	GH_only
chrX-48910001-48911000	-40.1886	group_2	ENSG00000102100	SLC35A2	Promoter (<=1kb)	full_rescue	CGI_and_GH
chrX-48899001-48900000	-100	group_2	ENSG00000102103	PQBP1	Intron (ENST00000651767/ENSG00000102103, intron 3 of 7)	full_rescue	CGI_and_GH
chrX-48883001-48884000	-68.3036	group_3	ENSG00000102103	PQBP1	Distal Intergenic	full_rescue	NA
chrX-48865001-48866000	-42.4242	group_4	ENSG00000102103	PQBP1	Distal Intergenic	full_rescue	NA
chrX-48847001-48848000	-29.8036	group_4	ENSG00000102109	PCSK1N	Distal Intergenic	full_rescue	NA
chrX-48846001-48847000	-77.621	group_2	ENSG00000102109	PCSK1N	Distal Intergenic	partial_rescue	NA
chrX-48842001-48843000	-100	group_3	ENSG00000102109	PCSK1N	Distal Intergenic	full_rescue	NA
chrX-48834001-48835000	-36.2376	group_1	ENSG00000102109	PCSK1N	Promoter (<=1kb)	full_rescue	CGI_and_GH
chrX-48826001-48827000	-34.0351	group_2	ENSG00000187682	ERAS	Promoter (<=1kb)	partial_rescue	CGI_only
chrX-48817001-48818000	-47.2727	group_3	ENSG00000094631	HDAC6	3' UTR	no_rescue	NA
chrX-48796001-48797000	-54.1031	group_3	ENSG00000094631	HDAC6	Distal Intergenic	full_rescue	NA
chrX-48787001-48788000	-34.5912	group_3	ENSG00000102145	GATA1	Promoter (<=1kb)	full_rescue	GH_only
chrX-48773001-48774000	-28.7885	group_3	ENSG00000171433	GLOD5	3' UTR	full_rescue	NA
chrX-48755001-48756000	-27.6555	group_4	ENSG00000171433	GLOD5	Distal Intergenic	full_rescue	NA
chrX-48735001-48736000	-34.0426	group_4	ENSG00000232828	AF196970.3	Intron (ENST00000416061/ENSG00000232828, intron 1 of 2)	full_rescue	CGI_and_GH
chrX-48725001-48726000	-26.2691	group_4	ENSG00000232828	AF196970.3	Intron (ENST00000416061/ENSG00000232828, intron 1 of 2)	full_rescue	NA
chrX-48723001-48724000	-28.373	group_4	ENSG00000232828	AF196970.3	Intron (ENST00000416061/ENSG00000232828, intron 1 of 2)	full_rescue	NA
chrX-48720001-48721000	-34.9549	group_3	ENSG00000232828	AF196970.3	Intron (ENST00000416061/ENSG00000232828, intron 1 of 2)	partial_rescue	NA
chrX-48716001-48717000	-28.9788	group_4	ENSG00000232828	AF196970.3	Intron (ENST00000416061/ENSG00000232828, intron 1 of 2)	full_rescue	GH_only
chrX-48712001-48713000	-43.4901	group_4	ENSG00000232828	AF196970.3	Intron (ENST00000416061/ENSG00000232828, intron 1 of 2)	full_rescue	GH_only
chrX-48711001-48712000	-37.9863	group_3	ENSG00000232828	AF196970.3	Intron (ENST00000416061/ENSG00000232828, intron 1 of 2)	full_rescue	GH_only
chrX-48707001-48708000	-27.2222	group_4	ENSG00000101945	SUV39H1	3' UTR	full_rescue	GH_only
chrX-48705001-48706000	-28.5964	group_4	ENSG00000101945	SUV39H1	Exon (ENST00000482260/ENSG00000101945, exon 1 of 4)	full_rescue	NA
chrX-48704001-48705000	-31.3025	group_4	ENSG00000101945	SUV39H1	Intron (ENST00000337852/ENSG00000101945, intron 3 of 5)	full_rescue	NA
chrX-48688001-48689000	-60.3175	group_3	ENSG00000015285	WAS	Exon (ENST00000376701/ENSG00000015285, exon 8 of 12)	full_rescue	NA
chrX-48685001-48686000	-55.4054	group_4	ENSG00000015285	WAS	Exon (ENST00000450772/ENSG00000015285, exon 5 of 9)	partial_rescue	NA
chrX-48684001-48685000	-30.5023	group_4	ENSG00000015285	WAS	Exon (ENST00000450772/ENSG00000015285, exon 4 of 9)	partial_rescue	NA
chrX-48674001-48675000	-28.0405	group_4	ENSG00000015285	WAS	Promoter (1-2kb)	full_rescue	CGI_only
chrX-48609001-48610000	-28.5714	group_4	ENSG00000101940	WDR13	Distal Intergenic	full_rescue	NA
chrX-48592001-48593000	-26.5306	group_4	ENSG00000101940	WDR13	Intron (ENST00000470124/ENSG00000101940, intron 1 of 2)	partial_rescue	NA
chrX-48581001-48582000	-42.7059	group_2	ENSG00000228343	RP11-1148L6.5	Promoter (<=1kb)	full_rescue	NA
chrX-48546001-48547000	-41.54	group_4	ENSG00000068354	TBC1D25	Intron (ENST00000376771/ENSG00000068354, intron 3 of 5)	full_rescue	NA
chrX-48534001-48535000	-27.4647	group_4	ENSG00000286268	NA	Intron (ENST00000651615/ENSG00000286268, intron 4 of 6)	full_rescue	NA
chrX-48531001-48532000	-42.5893	group_3	ENSG00000286268	NA	Intron (ENST00000651615/ENSG00000286268, intron 4 of 6)	partial_rescue	NA
chrX-48527001-48528000	-48.1481	group_4	ENSG00000147155	EBP	Exon (ENST00000276096/ENSG00000147155, exon 3 of 5)	full_rescue	NA
chrX-48516001-48517000	-32.7649	group_4	ENSG00000102312	PORCN	3' UTR	full_rescue	NA
chrX-48513001-48514000	-51.7601	group_3	ENSG00000102312	PORCN	Intron (ENST00000359882/ENSG00000102312, intron 6 of 13)	full_rescue	NA
chrX-48512001-48513000	-28.2379	group_4	ENSG00000102312	PORCN	3' UTR	no_rescue	NA
chrX-48500001-48501000	-38.8889	group_4	ENSG00000224292	AF196972.9	Distal Intergenic	full_rescue	NA
chrX-48495001-48496000	-51.8519	group_3	ENSG00000224292	AF196972.9	Distal Intergenic	full_rescue	NA
chrX-48491001-48492000	-25.9708	group_4	ENSG00000068438	FTSJ1	Distal Intergenic	full_rescue	GH_only
chrX-48489001-48490000	-30.303	group_4	ENSG00000068438	FTSJ1	Distal Intergenic	no_rescue	GH_only
chrX-48487001-48488000	-27.8663	group_4	ENSG00000068438	FTSJ1	Distal Intergenic	full_rescue	GH_only
chrX-48466001-48467000	-33.0357	group_4	ENSG00000017483	SLC38A5	5' UTR	full_rescue	GH_only
chrX-48463001-48464000	-31.746	group_4	ENSG00000017483	SLC38A5	Intron (ENST00000595796/ENSG00000017483, intron 7 of 15)	full_rescue	NA
chrX-48433001-48434000	-26.0485	group_4	ENSG00000235350	AF196972.3	Promoter (<=1kb)	full_rescue	NA
chrX-48428001-48429000	-30	group_4	ENSG00000235350	AF196972.3	Distal Intergenic	full_rescue	NA
chrX-48367001-48368000	-39.3665	group_3	ENSG00000234448	RP11-344N17.13	Distal Intergenic	partial_rescue	NA
chrX-48358001-48359000	-29.5112	group_4	ENSG00000225055	RP11-344N17.9	Promoter (<=1kb)	full_rescue	NA
chrX-48345001-48346000	-38.78	group_4	ENSG00000270747	RP11-344N17.15	Downstream (<1kb)	partial_rescue	NA
chrX-48328001-48329000	-26.8362	group_4	ENSG00000230100	RP11-344N17.8	Distal Intergenic	partial_rescue	NA
chrX-48315001-48316000	-33.4634	group_3	ENSG00000227302	SSXP9	Distal Intergenic	full_rescue	NA
chrX-48304001-48305000	-34.7891	group_4	ENSG00000204648	SSX9	Exon (ENST00000376909/ENSG00000204648, exon 1 of 6)	full_rescue	NA
chrX-48303001-48304000	-32.0388	group_4	ENSG00000204648	SSX9	Exon (ENST00000376909/ENSG00000204648, exon 3 of 6)	full_rescue	NA
chrX-48294001-48295000	-30.3235	group_4	ENSG00000204648	SSX9	Downstream (1-2kb)	full_rescue	NA
chrX-48287001-48288000	-33.3575	group_4	ENSG00000237345	RP11-344N17.11	Distal Intergenic	full_rescue	NA
chrX-48268001-48269000	-28.2481	group_3	ENSG00000232813	RP11-344N17.2	Distal Intergenic	partial_rescue	NA
chrX-48257001-48258000	-41.0256	group_4	ENSG00000126752	SSX1	5' UTR	partial_rescue	NA
chrX-48252001-48253000	-25.0292	group_4	ENSG00000126752	SSX1	Distal Intergenic	full_rescue	NA
chrX-48243001-48244000	-40.0769	group_3	ENSG00000229662	RP11-552E4.5	Promoter (<=1kb)	full_rescue	NA
chrX-48208001-48209000	-36.5498	group_4	ENSG00000252856	RNA5SP503	Distal Intergenic	full_rescue	NA
chrX-48207001-48208000	-57.1429	group_4	ENSG00000252856	RNA5SP503	Promoter (<=1kb)	full_rescue	NA
chrX-482001-483000	-28.7082	group_3	ENSG00000234958	FABP5P13	Distal Intergenic	full_rescue	NA
chrX-48195001-48196000	-30.5481	group_4	ENSG00000165583	SSX5	Promoter (<=1kb)	full_rescue	NA
chrX-48185001-48186000	-66.129	group_3	ENSG00000238032	RP11-38O23.7	Downstream (<1kb)	partial_rescue	NA
chrX-48177001-48178000	-70.8333	group_2	ENSG00000238032	RP11-38O23.7	Promoter (<=1kb)	full_rescue	NA
chrX-48157001-48158000	-33.8805	group_4	ENSG00000225198	SSXP3	Promoter (<=1kb)	full_rescue	NA
chrX-48146001-48147000	-33.428	group_4	ENSG00000201517	RNU6-707P	Distal Intergenic	full_rescue	NA
chrX-48145001-48146000	-28.8462	group_4	ENSG00000201517	RNU6-707P	Distal Intergenic	full_rescue	NA
chrX-48068001-48069000	-39.1575	group_4	ENSG00000221994	ZNF630	Intron (ENST00000428463/ENSG00000221994, intron 1 of 11)	full_rescue	GH_only
chrX-48055001-48056000	-28.4815	group_4	ENSG00000221994	ZNF630	Intron (ENST00000428463/ENSG00000221994, intron 5 of 11)	full_rescue	NA
chrX-48038001-48039000	-57.9254	group_2	ENSG00000221994	ZNF630	Intron (ENST00000428463/ENSG00000221994, intron 7 of 11)	full_rescue	NA
chrX-48033001-48034000	-29.8887	group_4	ENSG00000221994	ZNF630	Intron (ENST00000428463/ENSG00000221994, intron 9 of 11)	full_rescue	NA
chrX-48030001-48031000	-32.1686	group_4	ENSG00000221994	ZNF630	Intron (ENST00000428463/ENSG00000221994, intron 9 of 11)	full_rescue	NA
chrX-48028001-48029000	-45.8446	group_4	ENSG00000221994	ZNF630	Intron (ENST00000428463/ENSG00000221994, intron 9 of 11)	full_rescue	GH_only
chrX-48022001-48023000	-31.7065	group_4	ENSG00000221994	ZNF630	Intron (ENST00000428463/ENSG00000221994, intron 9 of 11)	full_rescue	GH_only
chrX-47959001-47960000	-41.3898	group_3	ENSG00000197779	ZNF81	Intron (ENST00000376950/ENSG00000197779, intron 4 of 4)	full_rescue	NA
chrX-47958001-47959000	-40.4762	group_3	ENSG00000197779	ZNF81	Intron (ENST00000376950/ENSG00000197779, intron 4 of 4)	full_rescue	NA
chrX-47954001-47955000	-55.1724	group_4	ENSG00000197779	ZNF81	Intron (ENST00000376950/ENSG00000197779, intron 4 of 4)	full_rescue	NA
chrX-47896001-47897000	-26.5909	group_4	ENSG00000197779	ZNF81	Intron (ENST00000338637/ENSG00000197779, intron 4 of 4)	full_rescue	NA
chrX-47888001-47889000	-28.7815	group_4	ENSG00000197779	ZNF81	3' UTR	full_rescue	NA
chrX-47853001-47854000	-54.1667	group_3	ENSG00000197779	ZNF81	Intron (ENST00000338637/ENSG00000197779, intron 2 of 4)	full_rescue	NA
chrX-47841001-47842000	-45.6631	group_2	ENSG00000224401	RPL7P57	Promoter (<=1kb)	full_rescue	NA
chrX-47806001-47807000	-40.2852	group_3	ENSG00000188459	WASF4P	Distal Intergenic	full_rescue	GH_only
chrX-47750001-47751000	-33.9632	group_3	ENSG00000187893	CXXC1P1	Intron (ENST00000589302/ENSG00000187893, intron 2 of 2)	partial_rescue	NA
chrX-47707001-47708000	-38.2292	group_4	ENSG00000187893	CXXC1P1	Promoter (<=1kb)	full_rescue	NA
chrX-47614001-47615000	-44.5151	group_4	ENSG00000008056	SYN1	Intron (ENST00000295987/ENSG00000008056, intron 1 of 12)	full_rescue	NA
chrX-47587001-47588000	-46.416	group_2	ENSG00000263858	MIR4769	Promoter (<=1kb)	full_rescue	GH_only
chrX-47570001-47571000	-28.2583	group_4	ENSG00000078061	ARAF	Exon (ENST00000377045/ENSG00000078061, exon 14 of 16)	full_rescue	NA
chrX-47525001-47526000	-45.4451	group_4	ENSG00000235636	NUS1P1	Distal Intergenic	full_rescue	CGI_only
chrX-47488001-47489000	-34.6199	group_4	ENSG00000196741	LINC01560	Distal Intergenic	full_rescue	GH_only
chrX-47477001-47478000	-30.7324	group_4	ENSG00000277605	Metazoa_SRP	Promoter (<=1kb)	full_rescue	NA
chrX-47468001-47469000	-28.8451	group_4	ENSG00000147124	ZNF41	Intron (ENST00000313116/ENSG00000147124, intron 1 of 4)	full_rescue	NA
chrX-47467001-47468000	-28.8856	group_4	ENSG00000147124	ZNF41	5' UTR	full_rescue	NA
chrX-47431001-47432000	-29.0691	group_4	ENSG00000226556	NPM1P49	Distal Intergenic	full_rescue	NA
chrX-47424001-47425000	-57.8947	group_4	ENSG00000226556	NPM1P49	Distal Intergenic	full_rescue	NA
chrX-47423001-47424000	-30.5085	group_4	ENSG00000226556	NPM1P49	Distal Intergenic	full_rescue	NA
chrX-47420001-47421000	-26.186	group_4	ENSG00000226556	NPM1P49	Distal Intergenic	full_rescue	NA
chrX-47399001-47400000	-31.4286	group_4	ENSG00000147117	ZNF157	Intron (ENST00000377073/ENSG00000147117, intron 1 of 3)	full_rescue	NA
chrX-47398001-47399000	-42.7766	group_4	ENSG00000147117	ZNF157	Intron (ENST00000377073/ENSG00000147117, intron 1 of 3)	full_rescue	NA
chrX-47391001-47392000	-52.1739	group_4	ENSG00000147117	ZNF157	Exon (ENST00000442314/ENSG00000232009, exon 2 of 3)	full_rescue	NA
chrX-47380001-47381000	-44.7368	group_4	ENSG00000147117	ZNF157	Intron (ENST00000377073/ENSG00000147117, intron 1 of 3)	full_rescue	NA
chrX-47360001-47361000	-57.1429	group_4	ENSG00000147117	ZNF157	Distal Intergenic	full_rescue	GH_only
chrX-47353001-47354000	-30.1126	group_3	ENSG00000147117	ZNF157	Distal Intergenic	full_rescue	NA
chrX-47338001-47339000	-56	group_4	ENSG00000147117	ZNF157	Distal Intergenic	full_rescue	NA
chrX-47323001-47324000	-45.1299	group_4	ENSG00000203402	RP11-571E6.3	Distal Intergenic	partial_rescue	NA
chrX-47289001-47290000	-37.0887	group_4	ENSG00000203402	RP11-571E6.3	Distal Intergenic	full_rescue	NA
chrX-47284001-47285000	-71.4286	group_3	ENSG00000266158	RN7SL785P	Distal Intergenic	full_rescue	NA
chrX-47274001-47275000	-41.9697	group_4	ENSG00000237623	RP11-571E6.1	Promoter (<=1kb)	full_rescue	NA
chrX-47266001-47267000	-30.8333	group_4	ENSG00000237623	RP11-571E6.1	Distal Intergenic	full_rescue	NA
chrX-47265001-47266000	-28.2051	group_4	ENSG00000237623	RP11-571E6.1	Distal Intergenic	full_rescue	NA
chrX-47186001-47187000	-51.5604	group_4	ENSG00000182872	RBM10	3' UTR	full_rescue	NA
chrX-47173001-47174000	-28.6013	group_4	ENSG00000182872	RBM10	Exon (ENST00000377604/ENSG00000182872, exon 5 of 24)	full_rescue	NA
chrX-47172001-47173000	-29.4559	group_4	ENSG00000182872	RBM10	Intron (ENST00000377604/ENSG00000182872, intron 4 of 23)	full_rescue	NA
chrX-47137001-47138000	-36.7415	group_4	ENSG00000201659	RNU12-2P	Distal Intergenic	full_rescue	NA
chrX-47134001-47135000	-31.8182	group_4	ENSG00000201659	RNU12-2P	Distal Intergenic	full_rescue	NA
chrX-47126001-47127000	-34.806	group_4	ENSG00000201659	RNU12-2P	Distal Intergenic	full_rescue	GH_only
chrX-47124001-47125000	-25.4216	group_4	ENSG00000201659	RNU12-2P	Distal Intergenic	full_rescue	NA
chrX-47113001-47114000	-28.329	group_4	ENSG00000201659	RNU12-2P	Distal Intergenic	full_rescue	NA
chrX-47078001-47079000	-51.3244	group_1	ENSG00000130988	RGN	Promoter (<=1kb)	partial_rescue	CGI_and_GH
chrX-47077001-47078000	-48.7805	group_4	ENSG00000130988	RGN	Promoter (<=1kb)	full_rescue	CGI_and_GH
chrX-47076001-47077000	-31.9411	group_4	ENSG00000130988	RGN	Promoter (1-2kb)	full_rescue	CGI_and_GH
chrX-47071001-47072000	-40.9095	group_3	ENSG00000130988	RGN	Distal Intergenic	full_rescue	NA
chrX-47058001-47059000	-31.6667	group_4	ENSG00000102221	JADE3	Exon (ENST00000611250/ENSG00000102221, exon 11 of 11)	full_rescue	NA
chrX-47048001-47049000	-41.1197	group_3	ENSG00000102221	JADE3	Intron (ENST00000611250/ENSG00000102221, intron 8 of 10)	full_rescue	NA
chrX-47029001-47030000	-31.9269	group_4	ENSG00000102221	JADE3	Intron (ENST00000611250/ENSG00000102221, intron 6 of 10)	full_rescue	NA
chrX-47028001-47029000	-72.2222	group_2	ENSG00000102221	JADE3	Exon (ENST00000611250/ENSG00000102221, exon 6 of 11)	partial_rescue	NA
chrX-46966001-46967000	-43.4615	group_3	ENSG00000102221	JADE3	Intron (ENST00000424392/ENSG00000102221, intron 1 of 5)	full_rescue	NA
chrX-46925001-46926000	-80.5556	group_3	ENSG00000102221	JADE3	Intron (ENST00000424392/ENSG00000102221, intron 1 of 5)	full_rescue	NA
chrX-46899001-46900000	-39.1304	group_4	ENSG00000204904	LINC01545	Promoter (<=1kb)	full_rescue	NA
chrX-46897001-46898000	-37.673	group_4	ENSG00000204904	LINC01545	Intron (ENST00000377879/ENSG00000204904, intron 1 of 3)	full_rescue	NA
chrX-46896001-46897000	-29.6717	group_4	ENSG00000204904	LINC01545	Intron (ENST00000377879/ENSG00000204904, intron 1 of 3)	full_rescue	NA
chrX-46831001-46832000	-31.0277	group_4	ENSG00000102218	RP2	Distal Intergenic	full_rescue	NA
chrX-46825001-46826000	-57.971	group_3	ENSG00000102218	RP2	Distal Intergenic	full_rescue	NA
chrX-46818001-46819000	-26.0563	group_4	ENSG00000102218	RP2	Distal Intergenic	full_rescue	NA
chrX-46801001-46802000	-43.985	group_3	ENSG00000102218	RP2	Distal Intergenic	full_rescue	NA
chrX-46798001-46799000	-77.7778	group_3	ENSG00000102218	RP2	Distal Intergenic	full_rescue	NA
chrX-46790001-46791000	-36.2245	group_4	ENSG00000065923	SLC9A7	Distal Intergenic	full_rescue	GH_only
chrX-46753001-46754000	-63.6364	group_4	ENSG00000065923	SLC9A7	Intron (ENST00000616978/ENSG00000065923, intron 1 of 16)	full_rescue	GH_only
chrX-46720001-46721000	-37.0421	group_3	ENSG00000065923	SLC9A7	Intron (ENST00000616978/ENSG00000065923, intron 1 of 16)	full_rescue	NA
chrX-46685001-46686000	-68.75	group_3	ENSG00000226048	YBX1P8	Promoter (<=1kb)	full_rescue	NA
chrX-46663001-46664000	-26.2626	group_4	ENSG00000065923	SLC9A7	Intron (ENST00000616978/ENSG00000065923, intron 5 of 16)	full_rescue	NA
chrX-46629001-46630000	-88.2353	group_3	ENSG00000065923	SLC9A7	Intron (ENST00000616978/ENSG00000065923, intron 14 of 16)	full_rescue	GH_only
chrX-46620001-46621000	-30.0163	group_4	ENSG00000065923	SLC9A7	Exon (ENST00000616978/ENSG00000065923, exon 15 of 17)	partial_rescue	NA
chrX-46611001-46612000	-52.9353	group_3	ENSG00000065923	SLC9A7	Intron (ENST00000616978/ENSG00000065923, intron 16 of 16)	partial_rescue	NA
chrX-46566001-46567000	-55.3846	group_4	ENSG00000270499	MKI67P1	Distal Intergenic	full_rescue	NA
chrX-46558001-46559000	-25.6579	group_4	ENSG00000270499	MKI67P1	Downstream (1-2kb)	partial_rescue	NA
chrX-46557001-46558000	-29.2735	group_4	ENSG00000277721	Metazoa_SRP	Downstream (2-3kb)	full_rescue	NA
chrX-46553001-46554000	-32.6849	group_4	ENSG00000277721	Metazoa_SRP	Promoter (<=1kb)	full_rescue	NA
chrX-46544001-46545000	-25.4902	group_4	ENSG00000251192	ZNF674	Promoter (<=1kb)	full_rescue	CGI_and_GH
chrX-46536001-46537000	-29.2308	group_4	ENSG00000251192	ZNF674	Intron (ENST00000523374/ENSG00000251192, intron 3 of 5)	partial_rescue	NA
chrX-46530001-46531000	-71.4286	group_3	ENSG00000251192	ZNF674	Intron (ENST00000523374/ENSG00000251192, intron 3 of 5)	partial_rescue	NA
chrX-46482001-46483000	-36.0109	group_4	ENSG00000147121	KRBOX4	Intron (ENST00000478600/ENSG00000147121, intron 5 of 5)	partial_rescue	NA
chrX-46477001-46478000	-30.3258	group_4	ENSG00000147121	KRBOX4	Intron (ENST00000478600/ENSG00000147121, intron 5 of 5)	partial_rescue	NA
chrX-46463001-46464000	-52.5424	group_4	ENSG00000147121	KRBOX4	Exon (ENST00000298190/ENSG00000147121, exon 5 of 6)	full_rescue	NA
chrX-46454001-46455000	-38.8889	group_4	ENSG00000147121	KRBOX4	Exon (ENST00000424779/ENSG00000224072, exon 3 of 4)	full_rescue	NA
chrX-46438001-46439000	-25.6289	group_4	ENSG00000235587	GAPDHP65	Downstream (<1kb)	full_rescue	NA
chrX-46430001-46431000	-55.8824	group_4	ENSG00000235587	GAPDHP65	Distal Intergenic	full_rescue	NA
chrX-46421001-46422000	-41.1201	group_4	ENSG00000231235	RP11-75A9.1	Promoter (<=1kb)	no_rescue	NA
chrX-46418001-46419000	-34.3284	group_4	ENSG00000231235	RP11-75A9.1	Exon (ENST00000373465/ENSG00000231235, exon 1 of 1)	partial_rescue	NA
chrX-46323001-46324000	-26.2987	group_4	ENSG00000236751	LINC01186	Exon (ENST00000668280/ENSG00000236751, exon 2 of 4)	partial_rescue	NA
chrX-46307001-46308000	-32.1526	group_4	ENSG00000236751	LINC01186	Exon (ENST00000658351/ENSG00000236751, exon 4 of 4)	full_rescue	NA
chrX-46259001-46260000	-30.3408	group_4	ENSG00000236751	LINC01186	Intron (ENST00000668280/ENSG00000236751, intron 3 of 3)	full_rescue	NA
chrX-46239001-46240000	-47.2222	group_4	ENSG00000229145	ACTBP1	Distal Intergenic	full_rescue	NA
chrX-46226001-46227000	-25.8019	group_4	ENSG00000229145	ACTBP1	Distal Intergenic	partial_rescue	NA
chrX-46193001-46194000	-32.3529	group_4	ENSG00000229145	ACTBP1	Distal Intergenic	partial_rescue	NA
chrX-46191001-46192000	-41.7582	group_3	ENSG00000229145	ACTBP1	Distal Intergenic	partial_rescue	NA
chrX-46190001-46191000	-40	group_4	ENSG00000229145	ACTBP1	Distal Intergenic	no_rescue	NA
chrX-46165001-46166000	-92.5926	group_3	ENSG00000278838	Metazoa_SRP	Distal Intergenic	partial_rescue	NA
chrX-46112001-46113000	-71.4286	group_4	ENSG00000278838	Metazoa_SRP	Distal Intergenic	full_rescue	NA
chrX-46057001-46058000	-75.1852	group_3	ENSG00000214009	PCNAP3	Downstream (<1kb)	full_rescue	NA
chrX-46016001-46017000	-29.2256	group_4	ENSG00000213100	KRT18P68	Distal Intergenic	full_rescue	NA
chrX-46004001-46005000	-30.2083	group_4	ENSG00000213100	KRT18P68	Distal Intergenic	full_rescue	NA
chrX-46001001-46002000	-35.8252	group_2	ENSG00000213100	KRT18P68	Distal Intergenic	partial_rescue	NA
chrX-45990001-45991000	-50.1012	group_3	ENSG00000213100	KRT18P68	Distal Intergenic	full_rescue	NA
chrX-45988001-45989000	-40.5517	group_3	ENSG00000213100	KRT18P68	Distal Intergenic	partial_rescue	NA
chrX-45984001-45985000	-46.0066	group_4	ENSG00000213100	KRT18P68	Promoter (<=1kb)	full_rescue	NA
chrX-45979001-45980000	-53.9855	group_4	ENSG00000213100	KRT18P68	Distal Intergenic	full_rescue	NA
chrX-45959001-45960000	-26.5136	group_4	ENSG00000224701	MED28P4	Distal Intergenic	full_rescue	NA
chrX-45944001-45945000	-50	group_4	ENSG00000224701	MED28P4	Distal Intergenic	full_rescue	NA
chrX-45913001-45914000	-30.4396	group_4	ENSG00000215286	RP5-1158E12.2	Promoter (<=1kb)	partial_rescue	NA
chrX-45790001-45791000	-43.0398	group_3	ENSG00000270069	MIR222HG	Distal Intergenic	full_rescue	NA
chrX-45789001-45790000	-48.6486	group_2	ENSG00000270069	MIR222HG	Distal Intergenic	full_rescue	NA
chrX-45779001-45780000	-38.2022	group_3	ENSG00000270069	MIR222HG	Distal Intergenic	no_rescue	NA
chrX-45753001-45754000	-32.6923	group_4	ENSG00000270069	MIR222HG	Intron (ENST00000602461/ENSG00000270069, intron 1 of 1)	full_rescue	NA
chrX-45742001-45743000	-57.9048	group_3	ENSG00000207870	MIR221	Downstream (2-3kb)	partial_rescue	NA
chrX-45633001-45634000	-25.9843	group_4	ENSG00000214282	KRT8P14	Promoter (<=1kb)	full_rescue	NA
chrX-45627001-45628000	-46.0317	group_4	ENSG00000229563	LINC01204	Intron (ENST00000422047/ENSG00000229563, intron 2 of 4)	full_rescue	NA
chrX-45591001-45592000	-51.8182	group_3	ENSG00000229563	LINC01204	Intron (ENST00000422047/ENSG00000229563, intron 1 of 4)	full_rescue	NA
chrX-45562001-45563000	-35.5693	group_4	ENSG00000229563	LINC01204	Intron (ENST00000422047/ENSG00000229563, intron 1 of 4)	full_rescue	NA
chrX-45547001-45548000	-29.8246	group_4	ENSG00000229563	LINC01204	Intron (ENST00000422047/ENSG00000229563, intron 1 of 4)	full_rescue	NA
chrX-45471001-45472000	-62.0879	group_3	ENSG00000229563	LINC01204	Distal Intergenic	full_rescue	NA
chrX-45321001-45322000	-39.4444	group_2	ENSG00000229491	RP11-342D14.1	Exon (ENST00000450246/ENSG00000229491, exon 2 of 6)	full_rescue	NA
chrX-45273001-45274000	-44.4589	group_4	ENSG00000229491	RP11-342D14.1	Intron (ENST00000438181/ENSG00000229491, intron 2 of 3)	full_rescue	NA
chrX-45200001-45201000	-45.1613	group_4	ENSG00000147113	CXorf36	Promoter (<=1kb)	partial_rescue	NA
chrX-45177001-45178000	-38.1849	group_3	ENSG00000147113	CXorf36	Intron (ENST00000398000/ENSG00000147113, intron 2 of 4)	full_rescue	NA
chrX-45150001-45151000	-25.4737	group_4	ENSG00000147113	CXorf36	3' UTR	full_rescue	NA
chrX-45066001-45067000	-31.7073	group_4	ENSG00000147050	KDM6A	Intron (ENST00000676062/ENSG00000147050, intron 16 of 29)	partial_rescue	NA
chrX-45052001-45053000	-69.2308	group_4	ENSG00000147050	KDM6A	Intron (ENST00000676062/ENSG00000147050, intron 9 of 29)	full_rescue	NA
chrX-45001001-45002000	-26.8239	group_3	ENSG00000147050	KDM6A	Intron (ENST00000676062/ENSG00000147050, intron 4 of 29)	full_rescue	GH_only
chrX-44912001-44913000	-30.8824	group_4	ENSG00000147050	KDM6A	Intron (ENST00000676062/ENSG00000147050, intron 2 of 29)	full_rescue	GH_only
chrX-44851001-44852000	-68.75	group_3	ENSG00000189037	DUSP21	Distal Intergenic	full_rescue	NA
chrX-44823001-44824000	-37.5566	group_3	ENSG00000189037	DUSP21	Distal Intergenic	full_rescue	NA
chrX-44471001-44472000	-30.7924	group_3	ENSG00000224054	RP4-551E13.2	Distal Intergenic	full_rescue	NA
chrX-44429001-44430000	-33.1818	group_2	ENSG00000200702	Y_RNA	Distal Intergenic	no_rescue	NA
chrX-44403001-44404000	-87.5	group_3	ENSG00000200702	Y_RNA	Distal Intergenic	full_rescue	GH_only
chrX-44344001-44345000	-32.0358	group_2	ENSG00000183690	EFHC2	Promoter (<=1kb)	full_rescue	CGI_and_GH
chrX-44315001-44316000	-41.2376	group_4	ENSG00000183690	EFHC2	Intron (ENST00000420999/ENSG00000183690, intron 1 of 14)	full_rescue	GH_only
chrX-44306001-44307000	-31.3433	group_4	ENSG00000183690	EFHC2	Intron (ENST00000420999/ENSG00000183690, intron 2 of 14)	full_rescue	NA
chrX-44272001-44273000	-28.0702	group_4	ENSG00000183690	EFHC2	Exon (ENST00000420999/ENSG00000183690, exon 3 of 15)	full_rescue	NA
chrX-44228001-44229000	-30.6122	group_4	ENSG00000183690	EFHC2	Intron (ENST00000420999/ENSG00000183690, intron 11 of 14)	partial_rescue	NA
chrX-44225001-44226000	-30.7692	group_4	ENSG00000183690	EFHC2	Exon (ENST00000343571/ENSG00000183690, exon 1 of 5)	full_rescue	NA
chrX-44189001-44190000	-25.0706	group_4	ENSG00000183690	EFHC2	Intron (ENST00000420999/ENSG00000183690, intron 11 of 14)	full_rescue	NA
chrX-44173001-44174000	-43.8961	group_3	ENSG00000183690	EFHC2	Intron (ENST00000420999/ENSG00000183690, intron 13 of 14)	partial_rescue	NA
chrX-44157001-44158000	-60.2167	group_4	ENSG00000183690	EFHC2	Intron (ENST00000420999/ENSG00000183690, intron 14 of 14)	full_rescue	NA
chrX-44120001-44121000	-50	group_4	ENSG00000214019	RP6-218J18.2	Distal Intergenic	full_rescue	NA
chrX-44029001-44030000	-36.131	group_4	ENSG00000214019	RP6-218J18.2	Promoter (<=1kb)	full_rescue	NA
chrX-43985001-43986000	-37.5	group_4	ENSG00000124479	NDP	Distal Intergenic	full_rescue	NA
chrX-43978001-43979000	-40.1536	group_4	ENSG00000124479	NDP	Distal Intergenic	full_rescue	NA
chrX-43881001-43882000	-42.7797	group_3	ENSG00000069535	MAOB	Promoter (<=1kb)	full_rescue	CGI_only
chrX-43817001-43818000	-36.3818	group_3	ENSG00000069535	MAOB	Intron (ENST00000378069/ENSG00000069535, intron 3 of 14)	full_rescue	NA
chrX-43780001-43781000	-32.4916	group_3	ENSG00000069535	MAOB	Exon (ENST00000378069/ENSG00000069535, exon 10 of 15)	no_rescue	NA
chrX-43720001-43721000	-53.5505	group_3	ENSG00000189221	MAOA	Intron (ENST00000542639/ENSG00000189221, intron 6 of 15)	full_rescue	NA
chrX-43719001-43720000	-39.4417	group_4	ENSG00000189221	MAOA	Intron (ENST00000542639/ENSG00000189221, intron 6 of 15)	full_rescue	NA
chrX-43718001-43719000	-34.1989	group_4	ENSG00000189221	MAOA	Intron (ENST00000542639/ENSG00000189221, intron 6 of 15)	full_rescue	NA
chrX-43714001-43715000	-48.5714	group_4	ENSG00000189221	MAOA	Intron (ENST00000542639/ENSG00000189221, intron 6 of 15)	full_rescue	NA
chrX-43653001-43654000	-61.1111	group_2	ENSG00000189221	MAOA	Promoter (<=1kb)	full_rescue	CGI_and_GH
chrX-43639001-43640000	-30.9354	group_4	ENSG00000189221	MAOA	Distal Intergenic	full_rescue	GH_only
chrX-43542001-43543000	-29.7353	group_4	ENSG00000189221	MAOA	Distal Intergenic	full_rescue	NA
chrX-43534001-43535000	-76.9231	group_3	ENSG00000189221	MAOA	Distal Intergenic	partial_rescue	NA
chrX-43529001-43530000	-44.186	group_4	ENSG00000231750	NANOGP10	Distal Intergenic	full_rescue	NA
chrX-43486001-43487000	-30.3204	group_4	ENSG00000231750	NANOGP10	Distal Intergenic	full_rescue	NA
chrX-43444001-43445000	-30.7692	group_4	ENSG00000231750	NANOGP10	Distal Intergenic	partial_rescue	NA
chrX-43403001-43404000	-25.5034	group_4	ENSG00000285899	NA	Intron (ENST00000649774/ENSG00000285899, intron 4 of 7)	full_rescue	NA
chrX-434001-435000	-59.1754	group_3	ENSG00000280767	RP13-465B17.5	Distal Intergenic	full_rescue	CGI_only
chrX-43395001-43396000	-33.9948	group_4	ENSG00000285899	NA	Exon (ENST00000649774/ENSG00000285899, exon 4 of 8)	full_rescue	NA
chrX-43351001-43352000	-39.1304	group_3	ENSG00000285899	NA	Intron (ENST00000649774/ENSG00000285899, intron 3 of 7)	no_rescue	NA
chrX-433001-434000	-38.5653	group_4	ENSG00000280767	RP13-465B17.5	Distal Intergenic	full_rescue	CGI_only
chrX-42996001-42997000	-41.5033	group_4	ENSG00000270280	RP11-265D20.1	Distal Intergenic	full_rescue	NA
chrX-42921001-42922000	-32.1111	group_4	ENSG00000270280	RP11-265D20.1	Distal Intergenic	full_rescue	NA
chrX-428001-429000	-35.1148	group_1	ENSG00000280767	RP13-465B17.5	Distal Intergenic	partial_rescue	CGI_only
chrX-42767001-42768000	-25.1388	group_4	ENSG00000102055	PPP1R2P9	Distal Intergenic	full_rescue	NA
chrX-42636001-42637000	-60	group_4	ENSG00000231772	RP1-154K9.2	Intron (ENST00000411879/ENSG00000231772, intron 6 of 7)	full_rescue	NA
chrX-42543001-42544000	-33.3333	group_4	ENSG00000231772	RP1-154K9.2	Intron (ENST00000411879/ENSG00000231772, intron 5 of 7)	partial_rescue	NA
chrX-42505001-42506000	-51.6026	group_3	ENSG00000231772	RP1-154K9.2	Intron (ENST00000411879/ENSG00000231772, intron 5 of 7)	full_rescue	NA
chrX-42504001-42505000	-27.7108	group_4	ENSG00000231772	RP1-154K9.2	Intron (ENST00000411879/ENSG00000231772, intron 5 of 7)	full_rescue	NA
chrX-425001-426000	-31.2209	group_4	ENSG00000280767	RP13-465B17.5	Distal Intergenic	full_rescue	CGI_only
chrX-42484001-42485000	-35.4839	group_4	ENSG00000231772	RP1-154K9.2	Intron (ENST00000411879/ENSG00000231772, intron 5 of 7)	full_rescue	NA
chrX-4248001-4249000	-38.6088	group_3	ENSG00000225722	RP11-706O15.8	Distal Intergenic	partial_rescue	NA
chrX-42467001-42468000	-42.6178	group_4	ENSG00000231772	RP1-154K9.2	Intron (ENST00000411879/ENSG00000231772, intron 4 of 7)	full_rescue	NA
chrX-42396001-42397000	-44.5833	group_3	ENSG00000231772	RP1-154K9.2	Intron (ENST00000411879/ENSG00000231772, intron 2 of 7)	full_rescue	NA
chrX-42322001-42323000	-58.1579	group_2	ENSG00000231772	RP1-154K9.2	Intron (ENST00000411879/ENSG00000231772, intron 2 of 7)	partial_rescue	NA
chrX-42273001-42274000	-40.1825	group_4	ENSG00000231772	RP1-154K9.2	Intron (ENST00000411879/ENSG00000231772, intron 2 of 7)	full_rescue	NA
chrX-42264001-42265000	-35.2101	group_3	ENSG00000231772	RP1-154K9.2	Intron (ENST00000411879/ENSG00000231772, intron 2 of 7)	partial_rescue	NA
chrX-42196001-42197000	-43.0108	group_4	ENSG00000206896	RNU6-1124P	Distal Intergenic	no_rescue	NA
chrX-42176001-42177000	-73.4568	group_3	ENSG00000206896	RNU6-1124P	Promoter (1-2kb)	partial_rescue	NA
chrX-42164001-42165000	-34.0611	group_4	ENSG00000206896	RNU6-1124P	Distal Intergenic	full_rescue	NA
chrX-42115001-42116000	-62.4633	group_3	ENSG00000228847	ATP5G2P4	Distal Intergenic	full_rescue	NA
chrX-42086001-42087000	-51.8519	group_3	ENSG00000228847	ATP5G2P4	Distal Intergenic	full_rescue	NA
chrX-42050001-42051000	-50	group_4	ENSG00000233103	RP11-524P6.1	Intron (ENST00000437466/ENSG00000233103, intron 1 of 1)	full_rescue	NA
chrX-42045001-42046000	-58.1481	group_3	ENSG00000233103	RP11-524P6.1	Downstream (1-2kb)	full_rescue	NA
chrX-42044001-42045000	-40.3226	group_3	ENSG00000233103	RP11-524P6.1	Downstream (2-3kb)	full_rescue	NA
chrX-41983001-41984000	-41.4701	group_4	ENSG00000147044	CASK	Distal Intergenic	full_rescue	NA
chrX-41945001-41946000	-41.3548	group_2	ENSG00000147044	CASK	Distal Intergenic	full_rescue	NA
chrX-41942001-41943000	-32.1429	group_4	ENSG00000147044	CASK	Distal Intergenic	partial_rescue	NA
chrX-41909001-41910000	-55.5556	group_4	ENSG00000147044	CASK	Intron (ENST00000421587/ENSG00000147044, intron 1 of 24)	full_rescue	NA
chrX-41824001-41825000	-65	group_3	ENSG00000147044	CASK	Intron (ENST00000421587/ENSG00000147044, intron 2 of 24)	partial_rescue	NA
chrX-41751001-41752000	-48.6842	group_4	ENSG00000147044	CASK	Intron (ENST00000421587/ENSG00000147044, intron 3 of 24)	full_rescue	NA
chrX-41738001-41739000	-60	group_4	ENSG00000147044	CASK	Intron (ENST00000421587/ENSG00000147044, intron 5 of 24)	full_rescue	NA
chrX-41719001-41720000	-73.3333	group_3	ENSG00000147044	CASK	Intron (ENST00000421587/ENSG00000147044, intron 5 of 24)	full_rescue	GH_only
chrX-41715001-41716000	-59.0726	group_3	ENSG00000147044	CASK	Intron (ENST00000421587/ENSG00000147044, intron 5 of 24)	full_rescue	GH_only
chrX-41467001-41468000	-43.3333	group_4	ENSG00000188937	NYX	Intron (ENST00000378220/ENSG00000188937, intron 2 of 2)	full_rescue	NA
chrX-41449001-41450000	-41.7742	group_4	ENSG00000188937	NYX	Intron (ENST00000378220/ENSG00000188937, intron 2 of 2)	full_rescue	NA
chrX-41445001-41446000	-28.9855	group_4	ENSG00000188937	NYX	Promoter (1-2kb)	full_rescue	GH_only
chrX-41425001-41426000	-31.5789	group_4	ENSG00000188937	NYX	Distal Intergenic	partial_rescue	NA
chrX-41375001-41376000	-25.3314	group_4	ENSG00000264573	RN7SL15P	Distal Intergenic	full_rescue	NA
chrX-41298001-41299000	-32.1128	group_3	ENSG00000199564	RNA5SP502	Distal Intergenic	full_rescue	NA
chrX-41284001-41285000	-45.8421	group_3	ENSG00000199564	RNA5SP502	Distal Intergenic	full_rescue	NA
chrX-41264001-41265000	-25.6334	group_4	ENSG00000223714	RP5-1172N10.2	Distal Intergenic	full_rescue	NA
chrX-41222001-41223000	-47.7612	group_4	ENSG00000124486	USP9X	Intron (ENST00000378308/ENSG00000124486, intron 38 of 44)	partial_rescue	NA
chrX-41193001-41194000	-50.8712	group_3	ENSG00000124486	USP9X	Intron (ENST00000378308/ENSG00000124486, intron 26 of 44)	partial_rescue	NA
chrX-41093001-41094000	-26.6123	group_4	ENSG00000124486	USP9X	Intron (ENST00000378308/ENSG00000124486, intron 1 of 44)	full_rescue	GH_only
chrX-41067001-41068000	-37.2024	group_3	ENSG00000237931	CLIC4P3	Distal Intergenic	full_rescue	NA
chrX-41000001-41001000	-32.3529	group_4	ENSG00000287549	NA	Distal Intergenic	full_rescue	NA
chrX-40885001-40886000	-64	group_3	ENSG00000232801	SDCBPP3	Distal Intergenic	full_rescue	NA
chrX-40863001-40864000	-50	group_4	ENSG00000232801	SDCBPP3	Distal Intergenic	full_rescue	NA
chrX-40851001-40852000	-33.8362	group_3	ENSG00000238222	MKRN4P	Distal Intergenic	full_rescue	NA
chrX-40822001-40823000	-36.6667	group_3	ENSG00000237661	RP11-169L17.5	Distal Intergenic	full_rescue	NA
chrX-40805001-40806000	-28.1039	group_4	ENSG00000237661	RP11-169L17.5	Distal Intergenic	full_rescue	NA
chrX-40804001-40805000	-37.2549	group_4	ENSG00000237661	RP11-169L17.5	Distal Intergenic	full_rescue	NA
chrX-40779001-40780000	-30.9582	group_4	ENSG00000214031	RP11-169L17.3	Distal Intergenic	partial_rescue	NA
chrX-40778001-40779000	-43.0931	group_4	ENSG00000214031	RP11-169L17.3	Distal Intergenic	full_rescue	NA
chrX-40765001-40766000	-29.3704	group_4	ENSG00000214031	RP11-169L17.3	Distal Intergenic	full_rescue	NA
chrX-40758001-40759000	-37.6643	group_4	ENSG00000270791	DPRXP6	Promoter (<=1kb)	full_rescue	NA
chrX-40690001-40691000	-51.8519	group_3	ENSG00000180182	MED14	Intron (ENST00000324817/ENSG00000180182, intron 15 of 30)	full_rescue	NA
chrX-40655001-40656000	-44.7368	group_4	ENSG00000180182	MED14	Exon (ENST00000324817/ENSG00000180182, exon 29 of 31)	full_rescue	NA
chrX-40642001-40643000	-28.5263	group_4	ENSG00000185753	CXorf38	Intron (ENST00000378426/ENSG00000185753, intron 1 of 4)	full_rescue	NA
chrX-40585001-40586000	-41.3043	group_4	ENSG00000182220	ATP6AP2	Intron (ENST00000436783/ENSG00000182220, intron 2 of 5)	full_rescue	NA
chrX-40571001-40572000	-40.9429	group_4	ENSG00000182220	ATP6AP2	Distal Intergenic	full_rescue	GH_only
chrX-40548001-40549000	-74.2754	group_2	ENSG00000238730	RNU7-164P	Distal Intergenic	partial_rescue	GH_only
chrX-40541001-40542000	-64.2045	group_3	ENSG00000238730	RNU7-164P	Distal Intergenic	full_rescue	GH_only
chrX-40520001-40521000	-48.6673	group_3	ENSG00000235685	RP11-126D17.1	Distal Intergenic	partial_rescue	NA
chrX-40519001-40520000	-70.074	group_3	ENSG00000235685	RP11-126D17.1	Distal Intergenic	full_rescue	NA
chrX-40513001-40514000	-43.8995	group_3	ENSG00000235685	RP11-126D17.1	Promoter (<=1kb)	full_rescue	NA
chrX-40498001-40499000	-42.6913	group_4	ENSG00000206677	Y_RNA	Distal Intergenic	partial_rescue	NA
chrX-40497001-40498000	-35.695	group_4	ENSG00000206677	Y_RNA	Distal Intergenic	partial_rescue	NA
chrX-40494001-40495000	-44.2058	group_3	ENSG00000206677	Y_RNA	Distal Intergenic	full_rescue	NA
chrX-40465001-40466000	-44.2029	group_4	ENSG00000206677	Y_RNA	Distal Intergenic	full_rescue	NA
chrX-40452001-40453000	-27.2277	group_4	ENSG00000206677	Y_RNA	Distal Intergenic	full_rescue	NA
chrX-40417001-40418000	-32.8557	group_3	ENSG00000214045	RP6-186E3.1	Distal Intergenic	partial_rescue	NA
chrX-40393001-40394000	-61.5385	group_4	ENSG00000214045	RP6-186E3.1	Distal Intergenic	full_rescue	NA
chrX-40334001-40335000	-41.6667	group_4	ENSG00000214045	RP6-186E3.1	Distal Intergenic	full_rescue	NA
chrX-40319001-40320000	-32.8012	group_4	ENSG00000214045	RP6-186E3.1	Distal Intergenic	full_rescue	NA
chrX-40314001-40315000	-53.3333	group_4	ENSG00000214045	RP6-186E3.1	Distal Intergenic	full_rescue	NA
chrX-40304001-40305000	-34.6939	group_4	ENSG00000236393	RP11-320G24.1	Distal Intergenic	full_rescue	NA
chrX-40263001-40264000	-31.1416	group_3	ENSG00000236393	RP11-320G24.1	Promoter (<=1kb)	full_rescue	NA
chrX-40261001-40262000	-47.675	group_4	ENSG00000236393	RP11-320G24.1	Promoter (<=1kb)	full_rescue	NA
chrX-40212001-40213000	-28.1092	group_4	ENSG00000183337	BCOR	Distal Intergenic	partial_rescue	NA
chrX-40191001-40192000	-27.7311	group_4	ENSG00000183337	BCOR	Distal Intergenic	full_rescue	NA
chrX-40078001-40079000	-51.5152	group_4	ENSG00000183337	BCOR	Intron (ENST00000397354/ENSG00000183337, intron 1 of 14)	full_rescue	NA
chrX-40029001-40030000	-28.5714	group_4	ENSG00000223486	AC092198.1	Distal Intergenic	partial_rescue	NA
chrX-40027001-40028000	-32.2581	group_4	ENSG00000223486	AC092198.1	Distal Intergenic	partial_rescue	NA
chrX-40011001-40012000	-38.9442	group_1	ENSG00000223486	AC092198.1	Exon (ENST00000447651/ENSG00000223486, exon 2 of 2)	full_rescue	CGI_and_GH
chrX-40004001-40005000	-25.2525	group_1	ENSG00000223486	AC092198.1	Distal Intergenic	full_rescue	CGI_and_GH
chrX-39984001-39985000	-28.5871	group_4	ENSG00000223486	AC092198.1	Distal Intergenic	full_rescue	NA
chrX-39967001-39968000	-31.8634	group_3	ENSG00000223486	AC092198.1	Distal Intergenic	full_rescue	NA
chrX-39961001-39962000	-25.6303	group_4	ENSG00000223486	AC092198.1	Distal Intergenic	full_rescue	NA
chrX-39936001-39937000	-54.5455	group_3	ENSG00000285709	NA	Distal Intergenic	full_rescue	NA
chrX-39935001-39936000	-25.8061	group_3	ENSG00000285709	NA	Distal Intergenic	full_rescue	NA
chrX-39915001-39916000	-25.7835	group_4	ENSG00000285709	NA	Distal Intergenic	full_rescue	NA
chrX-39900001-39901000	-32.6667	group_3	ENSG00000285709	NA	Distal Intergenic	full_rescue	GH_only
chrX-39897001-39898000	-35.2929	group_3	ENSG00000285709	NA	Distal Intergenic	full_rescue	GH_only
chrX-39861001-39862000	-25.1515	group_4	ENSG00000214047	RPS11P7	Distal Intergenic	full_rescue	NA
chrX-39849001-39850000	-40.8666	group_3	ENSG00000261435	RP13-126P21.2	Promoter (<=1kb)	full_rescue	NA
chrX-39837001-39838000	-94.1176	group_3	ENSG00000263972	MIR1587	Promoter (<=1kb)	full_rescue	NA
chrX-39814001-39815000	-28.0934	group_4	ENSG00000270759	CTD-2324A24.2	Distal Intergenic	full_rescue	NA
chrX-39802001-39803000	-45.7476	group_2	ENSG00000270759	CTD-2324A24.2	Distal Intergenic	full_rescue	NA
chrX-39759001-39760000	-37.5992	group_3	ENSG00000264618	RN7SL732P	Distal Intergenic	full_rescue	NA
chrX-39755001-39756000	-28.6885	group_4	ENSG00000264618	RN7SL732P	Distal Intergenic	full_rescue	NA
chrX-39741001-39742000	-30.0207	group_4	ENSG00000264618	RN7SL732P	Distal Intergenic	full_rescue	NA
chrX-39736001-39737000	-29.0909	group_4	ENSG00000264618	RN7SL732P	Distal Intergenic	full_rescue	NA
chrX-39722001-39723000	-50	group_4	ENSG00000263730	MIR3937	Distal Intergenic	full_rescue	NA
chrX-39700001-39701000	-26.4348	group_4	ENSG00000263730	MIR3937	Distal Intergenic	partial_rescue	NA
chrX-39686001-39687000	-25.2863	group_4	ENSG00000263730	MIR3937	Distal Intergenic	full_rescue	CGI_only
chrX-39658001-39659000	-26.1509	group_4	ENSG00000263730	MIR3937	Distal Intergenic	full_rescue	NA
chrX-39652001-39653000	-29.7131	group_3	ENSG00000263730	MIR3937	Distal Intergenic	full_rescue	NA
chrX-39651001-39652000	-26.0038	group_4	ENSG00000263730	MIR3937	Distal Intergenic	full_rescue	NA
chrX-39637001-39638000	-67.5287	group_3	ENSG00000263730	MIR3937	Distal Intergenic	partial_rescue	NA
chrX-39622001-39623000	-35.6282	group_3	ENSG00000263730	MIR3937	Distal Intergenic	partial_rescue	NA
chrX-39581001-39582000	-31.1111	group_4	ENSG00000263730	MIR3937	Distal Intergenic	partial_rescue	NA
chrX-39580001-39581000	-52.8017	group_3	ENSG00000263730	MIR3937	Distal Intergenic	full_rescue	NA
chrX-39578001-39579000	-28.7395	group_3	ENSG00000263730	MIR3937	Distal Intergenic	full_rescue	NA
chrX-39576001-39577000	-42.3198	group_4	ENSG00000263730	MIR3937	Distal Intergenic	full_rescue	NA
chrX-39564001-39565000	-39.8367	group_3	ENSG00000263730	MIR3937	Distal Intergenic	partial_rescue	NA
chrX-39552001-39553000	-61.1749	group_4	ENSG00000263730	MIR3937	Distal Intergenic	full_rescue	NA
chrX-39535001-39536000	-40	group_3	ENSG00000234191	RP11-157D23.2	Distal Intergenic	partial_rescue	NA
chrX-39519001-39520000	-31.3853	group_3	ENSG00000234191	RP11-157D23.2	Distal Intergenic	full_rescue	NA
chrX-39491001-39492000	-35.8326	group_3	ENSG00000234191	RP11-157D23.2	Distal Intergenic	full_rescue	NA
chrX-39489001-39490000	-33.6538	group_4	ENSG00000234191	RP11-157D23.2	Distal Intergenic	full_rescue	NA
chrX-39479001-39480000	-55.6936	group_3	ENSG00000234191	RP11-157D23.2	Distal Intergenic	full_rescue	NA
chrX-39478001-39479000	-33.8945	group_4	ENSG00000234191	RP11-157D23.2	Distal Intergenic	partial_rescue	NA
chrX-39475001-39476000	-38.8889	group_4	ENSG00000234191	RP11-157D23.2	Distal Intergenic	full_rescue	NA
chrX-39471001-39472000	-26.087	group_4	ENSG00000234191	RP11-157D23.2	Distal Intergenic	full_rescue	NA
chrX-39465001-39466000	-40.5714	group_4	ENSG00000234191	RP11-157D23.2	Distal Intergenic	full_rescue	NA
chrX-39451001-39452000	-37.2283	group_4	ENSG00000234191	RP11-157D23.2	Distal Intergenic	full_rescue	NA
chrX-39443001-39444000	-54.2609	group_2	ENSG00000234191	RP11-157D23.2	Distal Intergenic	partial_rescue	NA
chrX-39430001-39431000	-57.9323	group_3	ENSG00000234191	RP11-157D23.2	Intron (ENST00000438867/ENSG00000234191, intron 1 of 3)	full_rescue	NA
chrX-39419001-39420000	-28.5469	group_4	ENSG00000234191	RP11-157D23.2	Intron (ENST00000438867/ENSG00000234191, intron 1 of 3)	full_rescue	NA
chrX-39414001-39415000	-72	group_3	ENSG00000234191	RP11-157D23.2	Intron (ENST00000438867/ENSG00000234191, intron 1 of 3)	full_rescue	NA
chrX-39412001-39413000	-41.1034	group_3	ENSG00000234191	RP11-157D23.2	Intron (ENST00000438867/ENSG00000234191, intron 1 of 3)	full_rescue	NA
chrX-39386001-39387000	-37.7935	group_3	ENSG00000236747	LINC01282	Intron (ENST00000431646/ENSG00000236747, intron 1 of 5)	partial_rescue	NA
chrX-39337001-39338000	-81.4815	group_3	ENSG00000235304	LINC01281	Distal Intergenic	full_rescue	NA
chrX-39330001-39331000	-35.5556	group_4	ENSG00000235304	LINC01281	Distal Intergenic	full_rescue	NA
chrX-39312001-39313000	-42.6614	group_3	ENSG00000235304	LINC01281	Intron (ENST00000448597/ENSG00000235304, intron 2 of 3)	no_rescue	NA
chrX-39310001-39311000	-28.4722	group_4	ENSG00000235304	LINC01281	Intron (ENST00000448597/ENSG00000235304, intron 2 of 3)	full_rescue	NA
chrX-39293001-39294000	-40.0072	group_4	ENSG00000224610	RP11-265P11.1	Intron (ENST00000438026/ENSG00000224610, intron 2 of 2)	partial_rescue	NA
chrX-39280001-39281000	-32.6461	group_3	ENSG00000224610	RP11-265P11.1	Intron (ENST00000438026/ENSG00000224610, intron 2 of 2)	full_rescue	NA
chrX-39233001-39234000	-55.7159	group_3	ENSG00000224610	RP11-265P11.1	Intron (ENST00000438026/ENSG00000224610, intron 2 of 2)	full_rescue	NA
chrX-39226001-39227000	-42.0113	group_3	ENSG00000224610	RP11-265P11.1	Exon (ENST00000438026/ENSG00000224610, exon 3 of 3)	full_rescue	NA
chrX-39177001-39178000	-37.6708	group_4	ENSG00000207122	RNU6-591P	Distal Intergenic	full_rescue	NA
chrX-39164001-39165000	-33.7745	group_3	ENSG00000207122	RNU6-591P	Distal Intergenic	full_rescue	CGI_only
chrX-39162001-39163000	-28.7393	group_1	ENSG00000207122	RNU6-591P	Distal Intergenic	full_rescue	CGI_only
chrX-39160001-39161000	-39.1042	group_3	ENSG00000207122	RNU6-591P	Distal Intergenic	full_rescue	CGI_only
chrX-39148001-39149000	-66.6667	group_3	ENSG00000207122	RNU6-591P	Distal Intergenic	full_rescue	NA
chrX-39072001-39073000	-49.6795	group_3	ENSG00000207122	RNU6-591P	Distal Intergenic	full_rescue	NA
chrX-39060001-39061000	-37.6744	group_4	ENSG00000207122	RNU6-591P	Distal Intergenic	full_rescue	NA
chrX-39057001-39058000	-36.9192	group_3	ENSG00000207122	RNU6-591P	Distal Intergenic	full_rescue	NA
chrX-39041001-39042000	-37.4613	group_3	ENSG00000207122	RNU6-591P	Distal Intergenic	full_rescue	NA
chrX-39040001-39041000	-44.898	group_3	ENSG00000207122	RNU6-591P	Distal Intergenic	partial_rescue	NA
chrX-39036001-39037000	-47.9328	group_3	ENSG00000207122	RNU6-591P	Distal Intergenic	full_rescue	NA
chrX-39003001-39004000	-48.1481	group_4	ENSG00000207122	RNU6-591P	Distal Intergenic	partial_rescue	NA
chrX-38982001-38983000	-43.3835	group_3	ENSG00000207122	RNU6-591P	Distal Intergenic	full_rescue	NA
chrX-38959001-38960000	-28.4127	group_4	ENSG00000207122	RNU6-591P	Distal Intergenic	full_rescue	NA
chrX-38908001-38909000	-35.5833	group_4	ENSG00000238123	MID1IP1-AS1	Distal Intergenic	full_rescue	NA
chrX-38749001-38750000	-49.0465	group_3	ENSG00000235806	RP4-646N3.1	Distal Intergenic	full_rescue	NA
chrX-38730001-38731000	-53.8462	group_4	ENSG00000235806	RP4-646N3.1	Distal Intergenic	full_rescue	NA
chrX-38701001-38702000	-56.962	group_4	ENSG00000235806	RP4-646N3.1	Distal Intergenic	full_rescue	NA
chrX-38674001-38675000	-51.7241	group_3	ENSG00000250349	RP5-972B16.2	3' UTR	partial_rescue	NA
chrX-38670001-38671000	-40.9826	group_4	ENSG00000250349	RP5-972B16.2	Intron (ENST00000465127/ENSG00000250349, intron 4 of 8)	full_rescue	NA
chrX-38625001-38626000	-36.6046	group_2	ENSG00000250349	RP5-972B16.2	Intron (ENST00000465127/ENSG00000250349, intron 3 of 8)	full_rescue	NA
chrX-38479001-38480000	-42.948	group_4	ENSG00000232370	AF241726.2	Promoter (<=1kb)	full_rescue	NA
chrX-38475001-38476000	-57.5	group_4	ENSG00000250349	RP5-972B16.2	Intron (ENST00000465127/ENSG00000250349, intron 3 of 8)	full_rescue	NA
chrX-38378001-38379000	-50	group_4	ENSG00000250349	RP5-972B16.2	Intron (ENST00000465127/ENSG00000250349, intron 3 of 8)	partial_rescue	NA
chrX-38375001-38376000	-45	group_3	ENSG00000250349	RP5-972B16.2	Intron (ENST00000465127/ENSG00000250349, intron 3 of 8)	full_rescue	NA
chrX-38361001-38362000	-42.6829	group_4	ENSG00000250349	RP5-972B16.2	Intron (ENST00000465127/ENSG00000250349, intron 3 of 8)	full_rescue	GH_only
chrX-38282001-38283000	-30	group_4	ENSG00000250349	RP5-972B16.2	Intron (ENST00000465127/ENSG00000250349, intron 3 of 8)	full_rescue	NA
chrX-38255001-38256000	-37.7311	group_4	ENSG00000250349	RP5-972B16.2	Intron (ENST00000465127/ENSG00000250349, intron 3 of 8)	full_rescue	CGI_only
chrX-38238001-38239000	-38.2812	group_4	ENSG00000250349	RP5-972B16.2	Intron (ENST00000465127/ENSG00000250349, intron 3 of 8)	full_rescue	NA
chrX-38217001-38218000	-46.4286	group_4	ENSG00000250349	RP5-972B16.2	Intron (ENST00000465127/ENSG00000250349, intron 3 of 8)	full_rescue	GH_only
chrX-38189001-38190000	-44.3338	group_3	ENSG00000250349	RP5-972B16.2	Intron (ENST00000465127/ENSG00000250349, intron 3 of 8)	partial_rescue	NA
chrX-38175001-38176000	-31.8146	group_2	ENSG00000250349	RP5-972B16.2	Intron (ENST00000465127/ENSG00000250349, intron 3 of 8)	full_rescue	NA
chrX-38170001-38171000	-75	group_2	ENSG00000250349	RP5-972B16.2	Intron (ENST00000465127/ENSG00000250349, intron 3 of 8)	partial_rescue	NA
chrX-38130001-38131000	-27.1265	group_4	ENSG00000250349	RP5-972B16.2	Intron (ENST00000465127/ENSG00000250349, intron 3 of 8)	full_rescue	NA
chrX-38129001-38130000	-26.0504	group_4	ENSG00000250349	RP5-972B16.2	Intron (ENST00000465127/ENSG00000250349, intron 3 of 8)	full_rescue	NA
chrX-38092001-38093000	-44.2308	group_3	ENSG00000250349	RP5-972B16.2	Intron (ENST00000465127/ENSG00000250349, intron 3 of 8)	no_rescue	NA
chrX-3806001-3807000	-54.504	group_2	ENSG00000286431	NA	Distal Intergenic	partial_rescue	NA
chrX-38000001-38001000	-36.6021	group_4	ENSG00000250349	RP5-972B16.2	Intron (ENST00000465127/ENSG00000250349, intron 3 of 8)	full_rescue	NA
chrX-37997001-37998000	-57.5	group_3	ENSG00000250349	RP5-972B16.2	Intron (ENST00000465127/ENSG00000250349, intron 3 of 8)	full_rescue	NA
chrX-37996001-37997000	-72.7273	group_3	ENSG00000250349	RP5-972B16.2	Intron (ENST00000465127/ENSG00000250349, intron 3 of 8)	full_rescue	NA
chrX-37994001-37995000	-38.8298	group_4	ENSG00000229674	AL121578.7	Promoter (<=1kb)	full_rescue	NA
chrX-37991001-37992000	-31.6327	group_4	ENSG00000250349	RP5-972B16.2	3' UTR	full_rescue	NA
chrX-37978001-37979000	-48.7302	group_2	ENSG00000250349	RP5-972B16.2	Intron (ENST00000465127/ENSG00000250349, intron 3 of 8)	full_rescue	NA
chrX-37952001-37953000	-34.3191	group_4	ENSG00000250349	RP5-972B16.2	Intron (ENST00000465127/ENSG00000250349, intron 3 of 8)	partial_rescue	NA
chrX-37755001-37756000	-39.7403	group_3	ENSG00000250349	RP5-972B16.2	Intron (ENST00000465127/ENSG00000250349, intron 3 of 8)	full_rescue	GH_only
chrX-37754001-37755000	-41.4894	group_4	ENSG00000250349	RP5-972B16.2	Intron (ENST00000465127/ENSG00000250349, intron 3 of 8)	no_rescue	GH_only
chrX-37700001-37701000	-37.037	group_4	ENSG00000285944	NA	Promoter (<=1kb)	partial_rescue	NA
chrX-37671001-37672000	-78.125	group_3	ENSG00000250349	RP5-972B16.2	Intron (ENST00000465127/ENSG00000250349, intron 3 of 8)	full_rescue	NA
chrX-37586001-37587000	-34.0792	group_4	ENSG00000250349	RP5-972B16.2	Intron (ENST00000465127/ENSG00000250349, intron 3 of 8)	full_rescue	NA
chrX-37560001-37561000	-31.4815	group_4	ENSG00000250349	RP5-972B16.2	Intron (ENST00000465127/ENSG00000250349, intron 3 of 8)	partial_rescue	NA
chrX-37529001-37530000	-66.3968	group_3	ENSG00000250349	RP5-972B16.2	Intron (ENST00000465127/ENSG00000250349, intron 3 of 8)	full_rescue	NA
chrX-37492001-37493000	-26.5912	group_4	ENSG00000219186	FTH1P19	Promoter (<=1kb)	full_rescue	CGI_only
chrX-37489001-37490000	-61.229	group_3	ENSG00000250349	RP5-972B16.2	Intron (ENST00000465127/ENSG00000250349, intron 3 of 8)	partial_rescue	CGI_only
chrX-37460001-37461000	-33.631	group_4	ENSG00000250349	RP5-972B16.2	Intron (ENST00000465127/ENSG00000250349, intron 3 of 8)	full_rescue	NA
chrX-374001-375000	-28.9359	group_1	ENSG00000167393	PPP2R3B	5' UTR	full_rescue	CGI_and_GH
chrX-37388001-37389000	-28.2497	group_4	ENSG00000130962	PRRG1	Intron (ENST00000491253/ENSG00000130962, intron 1 of 2)	full_rescue	NA
chrX-37321001-37322000	-79.798	group_3	ENSG00000130962	PRRG1	Distal Intergenic	full_rescue	NA
chrX-37045001-37046000	-51.3369	group_3	ENSG00000243048	FTH1P18	Promoter (1-2kb)	full_rescue	CGI_only
chrX-37043001-37044000	-31.8649	group_4	ENSG00000243048	FTH1P18	Promoter (<=1kb)	full_rescue	CGI_only
chrX-37008001-37009000	-25.6875	group_4	ENSG00000198173	FAM47C	Promoter (<=1kb)	full_rescue	CGI_only
chrX-36995001-36996000	-39.6465	group_3	ENSG00000231069	BX842568.4	Distal Intergenic	full_rescue	NA
chrX-3698001-3699000	-25.098	group_4	ENSG00000183943	PRKX	Intron (ENST00000262848/ENSG00000183943, intron 1 of 8)	full_rescue	GH_only
chrX-3697001-3698000	-34.5917	group_4	ENSG00000183943	PRKX	Intron (ENST00000262848/ENSG00000183943, intron 1 of 8)	full_rescue	GH_only
chrX-36933001-36934000	-43.4783	group_4	ENSG00000235510	BX842568.1	Distal Intergenic	full_rescue	NA
chrX-36879001-36880000	-36.7925	group_4	ENSG00000286475	NA	Distal Intergenic	full_rescue	NA
chrX-36785001-36786000	-26.2887	group_3	ENSG00000286475	NA	Intron (ENST00000666628/ENSG00000286475, intron 2 of 2)	full_rescue	NA
chrX-36782001-36783000	-75.2849	group_3	ENSG00000286475	NA	Intron (ENST00000666628/ENSG00000286475, intron 2 of 2)	full_rescue	NA
chrX-36776001-36777000	-41.4499	group_2	ENSG00000286475	NA	Intron (ENST00000666628/ENSG00000286475, intron 2 of 2)	partial_rescue	NA
chrX-36773001-36774000	-44.7619	group_2	ENSG00000286475	NA	Intron (ENST00000666628/ENSG00000286475, intron 2 of 2)	full_rescue	NA
chrX-36768001-36769000	-34.3597	group_4	ENSG00000286475	NA	Intron (ENST00000666628/ENSG00000286475, intron 2 of 2)	full_rescue	NA
chrX-36766001-36767000	-31.9892	group_4	ENSG00000286475	NA	Intron (ENST00000666628/ENSG00000286475, intron 2 of 2)	full_rescue	NA
chrX-36758001-36759000	-34.2339	group_3	ENSG00000286475	NA	Intron (ENST00000666628/ENSG00000286475, intron 2 of 2)	full_rescue	NA
chrX-36757001-36758000	-43.359	group_3	ENSG00000286475	NA	Intron (ENST00000666628/ENSG00000286475, intron 2 of 2)	full_rescue	NA
chrX-36753001-36754000	-34.0942	group_4	ENSG00000286475	NA	Intron (ENST00000666628/ENSG00000286475, intron 2 of 2)	full_rescue	NA
chrX-36750001-36751000	-40	group_4	ENSG00000286475	NA	Intron (ENST00000666628/ENSG00000286475, intron 2 of 2)	full_rescue	NA
chrX-36740001-36741000	-48.136	group_4	ENSG00000286475	NA	Intron (ENST00000666628/ENSG00000286475, intron 2 of 2)	full_rescue	NA
chrX-36730001-36731000	-40.0535	group_3	ENSG00000286475	NA	Intron (ENST00000666628/ENSG00000286475, intron 2 of 2)	full_rescue	NA
chrX-36716001-36717000	-48	group_3	ENSG00000286475	NA	Intron (ENST00000666628/ENSG00000286475, intron 2 of 2)	full_rescue	NA
chrX-36715001-36716000	-64.1608	group_2	ENSG00000286475	NA	Intron (ENST00000666628/ENSG00000286475, intron 2 of 2)	partial_rescue	NA
chrX-36632001-36633000	-47.75	group_3	ENSG00000249467	RP11-492O8.1	Distal Intergenic	full_rescue	NA
chrX-36561001-36562000	-43.1373	group_4	ENSG00000226484	RP11-87M18.2	Distal Intergenic	full_rescue	NA
chrX-36523001-36524000	-69.3182	group_3	ENSG00000226484	RP11-87M18.2	Distal Intergenic	full_rescue	NA
chrX-36442001-36443000	-52.9412	group_3	ENSG00000226484	RP11-87M18.2	Promoter (1-2kb)	partial_rescue	NA
chrX-36235001-36236000	-26.7735	group_4	ENSG00000165164	CFAP47	Exon (ENST00000378653/ENSG00000165164, exon 47 of 64)	partial_rescue	NA
chrX-35987001-35988000	-39.4975	group_4	ENSG00000165164	CFAP47	Intron (ENST00000297866/ENSG00000165164, intron 15 of 15)	full_rescue	NA
chrX-35891001-35892000	-32.6923	group_4	ENSG00000271519	RP11-307A17.2	Distal Intergenic	partial_rescue	NA
chrX-35802001-35803000	-29.4737	group_4	ENSG00000189023	MAGEB16	5' UTR	partial_rescue	NA
chrX-35764001-35765000	-33.6895	group_3	ENSG00000233880	RP11-497J7.2	Distal Intergenic	full_rescue	NA
chrX-35733001-35734000	-33.6523	group_3	ENSG00000271088	RP11-497J7.4	Distal Intergenic	full_rescue	NA
chrX-35654001-35655000	-25.7576	group_4	ENSG00000230227	SIAH1P1	Distal Intergenic	full_rescue	NA
chrX-35548001-35549000	-27.863	group_4	ENSG00000252411	RNU6-1087P	Distal Intergenic	full_rescue	NA
chrX-35496001-35497000	-38.2107	group_4	ENSG00000252411	RNU6-1087P	Distal Intergenic	full_rescue	NA
chrX-35456001-35457000	-27.2727	group_4	ENSG00000252411	RNU6-1087P	Distal Intergenic	full_rescue	NA
chrX-35414001-35415000	-42.3077	group_4	ENSG00000252411	RNU6-1087P	Distal Intergenic	full_rescue	NA
chrX-35285001-35286000	-31.1313	group_4	ENSG00000229347	RP11-504E21.1	Distal Intergenic	full_rescue	NA
chrX-35268001-35269000	-30.3981	group_4	ENSG00000229347	RP11-504E21.1	Distal Intergenic	full_rescue	NA
chrX-35250001-35251000	-48.7179	group_4	ENSG00000229347	RP11-504E21.1	Distal Intergenic	full_rescue	NA
chrX-35244001-35245000	-38.3952	group_4	ENSG00000229347	RP11-504E21.1	Distal Intergenic	full_rescue	NA
chrX-35151001-35152000	-33.3333	group_4	ENSG00000229347	RP11-504E21.1	Distal Intergenic	partial_rescue	NA
chrX-35037001-35038000	-40.8782	group_4	ENSG00000229347	RP11-504E21.1	Distal Intergenic	full_rescue	NA
chrX-35022001-35023000	-49.1315	group_3	ENSG00000229347	RP11-504E21.1	Distal Intergenic	full_rescue	NA
chrX-34978001-34979000	-27.9689	group_4	ENSG00000189132	FAM47B	Distal Intergenic	full_rescue	NA
chrX-34933001-34934000	-26.092	group_4	ENSG00000189132	FAM47B	Distal Intergenic	full_rescue	NA
chrX-34896001-34897000	-28.2051	group_4	ENSG00000189132	FAM47B	Distal Intergenic	no_rescue	NA
chrX-34705001-34706000	-33.4842	group_4	ENSG00000225384	RP13-643D4.1	Distal Intergenic	full_rescue	NA
chrX-34680001-34681000	-42.8571	group_4	ENSG00000147027	TMEM47	Distal Intergenic	partial_rescue	NA
chrX-34483001-34484000	-27.8388	group_4	ENSG00000271136	RP11-320J16.1	Distal Intergenic	full_rescue	NA
chrX-3444001-3445000	-46.7593	group_3	ENSG00000213487	ASS1P4	Distal Intergenic	full_rescue	NA
chrX-34413001-34414000	-35.1852	group_4	ENSG00000233571	RP11-545D19.1	Intron (ENST00000412652/ENSG00000233571, intron 1 of 2)	partial_rescue	NA
chrX-34412001-34413000	-45.1903	group_3	ENSG00000233571	RP11-545D19.1	Intron (ENST00000412652/ENSG00000233571, intron 1 of 2)	full_rescue	NA
chrX-34207001-34208000	-33.9517	group_4	ENSG00000233928	RP11-305F18.1	Intron (ENST00000668394/ENSG00000233928, intron 3 of 8)	full_rescue	NA
chrX-34126001-34127000	-28.3932	group_4	ENSG00000233928	RP11-305F18.1	Intron (ENST00000668394/ENSG00000233928, intron 3 of 8)	full_rescue	NA
chrX-34081001-34082000	-47.5	group_3	ENSG00000233928	RP11-305F18.1	Intron (ENST00000668394/ENSG00000233928, intron 3 of 8)	full_rescue	NA
chrX-34080001-34081000	-30.1471	group_4	ENSG00000233928	RP11-305F18.1	Intron (ENST00000668394/ENSG00000233928, intron 3 of 8)	partial_rescue	NA
chrX-34023001-34024000	-70.5882	group_3	ENSG00000233928	RP11-305F18.1	Intron (ENST00000664553/ENSG00000233928, intron 3 of 4)	full_rescue	NA
chrX-33808001-33809000	-36.5079	group_4	ENSG00000233928	RP11-305F18.1	Intron (ENST00000664553/ENSG00000233928, intron 1 of 4)	full_rescue	NA
chrX-33660001-33661000	-50	group_3	ENSG00000287700	NA	Distal Intergenic	no_rescue	NA
chrX-33560001-33561000	-26.3158	group_4	ENSG00000215310	RP6-60B16.1	Distal Intergenic	full_rescue	NA
chrX-3344001-3345000	-68.7324	group_1	ENSG00000101825	MXRA5	Intron (ENST00000217939/ENSG00000101825, intron 1 of 6)	no_rescue	CGI_and_GH
chrX-3343001-3344000	-56.4744	group_1	ENSG00000101825	MXRA5	5' UTR	no_rescue	CGI_and_GH
chrX-331001-332000	-67.3048	group_2	ENSG00000226179	LINC00685	Downstream (1-2kb)	partial_rescue	CGI_only
chrX-3271001-3272000	-41.7921	group_4	ENSG00000228459	LINC01546	Promoter (<=1kb)	full_rescue	GH_only
chrX-32449001-32450000	-27.7056	group_4	ENSG00000198947	DMD	Intron (ENST00000357033/ENSG00000198947, intron 26 of 78)	full_rescue	NA
chrX-32305001-32306000	-38.75	group_4	ENSG00000198947	DMD	Intron (ENST00000619831/ENSG00000198947, intron 14 of 50)	full_rescue	NA
chrX-32226001-32227000	-37.3333	group_4	ENSG00000198947	DMD	Intron (ENST00000619831/ENSG00000198947, intron 15 of 50)	partial_rescue	NA
chrX-32225001-32226000	-46.6667	group_3	ENSG00000198947	DMD	Intron (ENST00000619831/ENSG00000198947, intron 15 of 50)	full_rescue	NA
chrX-32220001-32221000	-51.6129	group_4	ENSG00000198947	DMD	Intron (ENST00000619831/ENSG00000198947, intron 15 of 50)	full_rescue	NA
chrX-32219001-32220000	-71.3333	group_2	ENSG00000198947	DMD	Intron (ENST00000619831/ENSG00000198947, intron 15 of 50)	partial_rescue	NA
chrX-32166001-32167000	-42.4242	group_4	ENSG00000198947	DMD	Intron (ENST00000619831/ENSG00000198947, intron 16 of 50)	full_rescue	NA
chrX-32028001-32029000	-46.6496	group_4	ENSG00000198947	DMD	Intron (ENST00000619831/ENSG00000198947, intron 16 of 50)	partial_rescue	NA
chrX-31978001-31979000	-31.6603	group_3	ENSG00000198947	DMD	Intron (ENST00000619831/ENSG00000198947, intron 16 of 50)	full_rescue	NA
chrX-31910001-31911000	-31.6802	group_4	ENSG00000198947	DMD	Intron (ENST00000619831/ENSG00000198947, intron 19 of 50)	full_rescue	NA
chrX-31757001-31758000	-34.0582	group_3	ENSG00000198947	DMD	Intron (ENST00000358062/ENSG00000198947, intron 4 of 29)	full_rescue	NA
chrX-31587001-31588000	-28.8462	group_4	ENSG00000198947	DMD	Intron (ENST00000358062/ENSG00000198947, intron 8 of 29)	full_rescue	NA
chrX-31583001-31584000	-55.8442	group_4	ENSG00000198947	DMD	Intron (ENST00000358062/ENSG00000198947, intron 8 of 29)	full_rescue	NA
chrX-31380001-31381000	-25.7143	group_4	ENSG00000198947	DMD	Intron (ENST00000358062/ENSG00000198947, intron 13 of 29)	partial_rescue	NA
chrX-31333001-31334000	-30.7692	group_4	ENSG00000198947	DMD	Intron (ENST00000358062/ENSG00000198947, intron 14 of 29)	partial_rescue	NA
chrX-31277001-31278000	-66.5805	group_3	ENSG00000198947	DMD	Intron (ENST00000358062/ENSG00000198947, intron 15 of 29)	full_rescue	NA
chrX-31241001-31242000	-28.9451	group_3	ENSG00000198947	DMD	Intron (ENST00000378723/ENSG00000198947, intron 2 of 16)	full_rescue	NA
chrX-31168001-31169000	-39.8454	group_4	ENSG00000198947	DMD	Intron (ENST00000481143/ENSG00000198947, intron 1 of 1)	full_rescue	NA
chrX-31060001-31061000	-43.3566	group_3	ENSG00000132446	FTHL17	Distal Intergenic	no_rescue	NA
chrX-31034001-31035000	-25.6708	group_4	ENSG00000132446	FTHL17	Distal Intergenic	full_rescue	NA
chrX-31013001-31014000	-75.8621	group_4	ENSG00000157625	TAB3	Distal Intergenic	full_rescue	NA
chrX-30943001-30944000	-26.6813	group_4	ENSG00000157625	TAB3	Intron (ENST00000378933/ENSG00000157625, intron 1 of 11)	full_rescue	NA
chrX-30893001-30894000	-43.4783	group_4	ENSG00000157625	TAB3	Intron (ENST00000378933/ENSG00000157625, intron 2 of 11)	full_rescue	GH_only
chrX-30764001-30765000	-38.7097	group_4	ENSG00000243055	GK-AS1	Distal Intergenic	full_rescue	NA
chrX-3076001-3077000	-37.7194	group_1	ENSG00000062096	ARSF	Exon (ENST00000381127/ENSG00000062096, exon 4 of 11)	no_rescue	NA
chrX-30680001-30681000	-47.7546	group_4	ENSG00000198814	GK	Intron (ENST00000378943/ENSG00000198814, intron 4 of 19)	full_rescue	GH_only
chrX-30598001-30599000	-40.6675	group_3	ENSG00000178556	CKS1BP6	Distal Intergenic	no_rescue	GH_only
chrX-30395001-30396000	-39.6104	group_4	ENSG00000169297	NR0B1	Distal Intergenic	full_rescue	NA
chrX-30373001-30374000	-44.4444	group_3	ENSG00000169297	NR0B1	Distal Intergenic	partial_rescue	NA
chrX-30362001-30363000	-45.0754	group_3	ENSG00000169297	NR0B1	Distal Intergenic	full_rescue	NA
chrX-30340001-30341000	-63.0952	group_3	ENSG00000169297	NR0B1	Distal Intergenic	no_rescue	NA
chrX-30294001-30295000	-74.4444	group_3	ENSG00000276940	PLCE1P1	Distal Intergenic	full_rescue	NA
chrX-30265001-30266000	-52.7273	group_4	ENSG00000214107	MAGEB1	Distal Intergenic	full_rescue	NA
chrX-30257001-30258000	-37.1134	group_3	ENSG00000214107	MAGEB1	Distal Intergenic	no_rescue	NA
chrX-30236001-30237000	-34.8315	group_4	ENSG00000198798	MAGEB3	3' UTR	no_rescue	NA
chrX-30235001-30236000	-40.1709	group_4	ENSG00000198798	MAGEB3	5' UTR	full_rescue	NA
chrX-30234001-30235000	-31.4935	group_4	ENSG00000198798	MAGEB3	Intron (ENST00000361644/ENSG00000198798, intron 4 of 4)	full_rescue	NA
chrX-30190001-30191000	-36.7879	group_4	ENSG00000270794	GS1-383H3.6	Distal Intergenic	full_rescue	NA
chrX-29987001-29988000	-49.2063	group_4	ENSG00000227592	PIGFP3	Distal Intergenic	full_rescue	NA
chrX-29913001-29914000	-30.9524	group_4	ENSG00000169306	IL1RAPL1	Intron (ENST00000378993/ENSG00000169306, intron 6 of 10)	full_rescue	NA
chrX-29830001-29831000	-59.0909	group_4	ENSG00000169306	IL1RAPL1	Intron (ENST00000378993/ENSG00000169306, intron 6 of 10)	full_rescue	NA
chrX-29783001-29784000	-25.5394	group_4	ENSG00000169306	IL1RAPL1	Intron (ENST00000378993/ENSG00000169306, intron 6 of 10)	full_rescue	NA
chrX-2962001-2963000	-36.9837	group_2	ENSG00000157399	ARSE	Intron (ENST00000381134/ENSG00000157399, intron 1 of 10)	full_rescue	GH_only
chrX-29592001-29593000	-46.0317	group_4	ENSG00000169306	IL1RAPL1	Intron (ENST00000378993/ENSG00000169306, intron 5 of 10)	partial_rescue	NA
chrX-29575001-29576000	-59.9702	group_3	ENSG00000169306	IL1RAPL1	Intron (ENST00000378993/ENSG00000169306, intron 5 of 10)	full_rescue	NA
chrX-29273001-29274000	-31.9993	group_4	ENSG00000169306	IL1RAPL1	Intron (ENST00000378993/ENSG00000169306, intron 2 of 10)	full_rescue	NA
chrX-29145001-29146000	-25.3968	group_4	ENSG00000169306	IL1RAPL1	Intron (ENST00000378993/ENSG00000169306, intron 2 of 10)	full_rescue	NA
chrX-29080001-29081000	-61.5385	group_4	ENSG00000169306	IL1RAPL1	Intron (ENST00000378993/ENSG00000169306, intron 2 of 10)	full_rescue	NA
chrX-29077001-29078000	-43.6111	group_4	ENSG00000169306	IL1RAPL1	Intron (ENST00000378993/ENSG00000169306, intron 2 of 10)	full_rescue	NA
chrX-28999001-29000000	-36.4524	group_4	ENSG00000169306	IL1RAPL1	Intron (ENST00000378993/ENSG00000169306, intron 2 of 10)	full_rescue	NA
chrX-28981001-28982000	-75	group_3	ENSG00000169306	IL1RAPL1	Intron (ENST00000378993/ENSG00000169306, intron 2 of 10)	full_rescue	NA
chrX-28977001-28978000	-28.6458	group_4	ENSG00000169306	IL1RAPL1	Intron (ENST00000378993/ENSG00000169306, intron 2 of 10)	full_rescue	NA
chrX-28902001-28903000	-54.2857	group_4	ENSG00000169306	IL1RAPL1	Intron (ENST00000378993/ENSG00000169306, intron 2 of 10)	full_rescue	NA
chrX-28745001-28746000	-35.4515	group_3	ENSG00000169306	IL1RAPL1	Intron (ENST00000378993/ENSG00000169306, intron 1 of 10)	full_rescue	NA
chrX-28710001-28711000	-28.5714	group_4	ENSG00000169306	IL1RAPL1	Intron (ENST00000378993/ENSG00000169306, intron 1 of 10)	full_rescue	NA
chrX-28691001-28692000	-47.619	group_4	ENSG00000169306	IL1RAPL1	Intron (ENST00000378993/ENSG00000169306, intron 1 of 10)	full_rescue	NA
chrX-28690001-28691000	-43.1335	group_4	ENSG00000169306	IL1RAPL1	Intron (ENST00000378993/ENSG00000169306, intron 1 of 10)	full_rescue	NA
chrX-28624001-28625000	-37.2066	group_3	ENSG00000169306	IL1RAPL1	Intron (ENST00000378993/ENSG00000169306, intron 1 of 10)	full_rescue	NA
chrX-28371001-28372000	-59.6429	group_4	ENSG00000277569	MIR6134	Distal Intergenic	full_rescue	NA
chrX-28322001-28323000	-27.9814	group_4	ENSG00000277569	MIR6134	Distal Intergenic	full_rescue	NA
chrX-28037001-28038000	-38.9289	group_4	ENSG00000226372	DCAF8L1	Distal Intergenic	full_rescue	NA
chrX-28030001-28031000	-65	group_4	ENSG00000226372	DCAF8L1	Distal Intergenic	full_rescue	NA
chrX-27926001-27927000	-44.2815	group_3	ENSG00000224589	RP11-12D5.6	Distal Intergenic	full_rescue	NA
chrX-27864001-27865000	-37.8184	group_2	ENSG00000233243	RP11-12D5.5	Promoter (<=1kb)	full_rescue	CGI_only
chrX-27832001-27833000	-36.649	group_4	ENSG00000226199	RP11-12D5.2	Promoter (<=1kb)	full_rescue	NA
chrX-27768001-27769000	-50.463	group_3	ENSG00000177689	MAGEB10	Distal Intergenic	full_rescue	NA
chrX-27696001-27697000	-40.6061	group_4	ENSG00000189186	DCAF8L2	Intron (ENST00000578111/ENSG00000189186, intron 5 of 5)	full_rescue	NA
chrX-27565001-27566000	-53.0651	group_3	ENSG00000189186	DCAF8L2	Distal Intergenic	full_rescue	NA
chrX-27471001-27472000	-29.2647	group_4	ENSG00000224960	PPP4R3CP	Distal Intergenic	full_rescue	NA
chrX-27463001-27464000	-31.401	group_4	ENSG00000224960	PPP4R3CP	Promoter (<=1kb)	full_rescue	NA
chrX-2739001-2740000	-48	group_4	ENSG00000002586	CD99	Intron (ENST00000611428/ENSG00000002586, intron 10 of 10)	full_rescue	NA
chrX-27288001-27289000	-28.5894	group_4	ENSG00000228933	RP11-268G12.1	Intron (ENST00000422048/ENSG00000228933, intron 3 of 5)	full_rescue	NA
chrX-27282001-27283000	-55.3398	group_4	ENSG00000228933	RP11-268G12.1	Intron (ENST00000422048/ENSG00000228933, intron 3 of 5)	partial_rescue	NA
chrX-27128001-27129000	-29.0698	group_4	ENSG00000242021	RP11-268G12.3	Exon (ENST00000436019/ENSG00000242021, exon 6 of 6)	full_rescue	NA
chrX-27115001-27116000	-52.6708	group_3	ENSG00000242021	RP11-268G12.3	Intron (ENST00000609836/ENSG00000242021, intron 1 of 1)	full_rescue	NA
chrX-2710001-2711000	-32.419	group_3	ENSG00000002586	CD99	Intron (ENST00000611428/ENSG00000002586, intron 1 of 10)	partial_rescue	GH_only
chrX-26943001-26944000	-36.0656	group_4	ENSG00000252491	RNU1-142P	Distal Intergenic	partial_rescue	NA
chrX-2692001-2693000	-39.3496	group_1	ENSG00000002586	CD99	Promoter (<=1kb)	full_rescue	CGI_and_GH
chrX-26911001-26912000	-47.619	group_4	ENSG00000252491	RNU1-142P	Distal Intergenic	full_rescue	NA
chrX-26865001-26866000	-42.3645	group_3	ENSG00000259849	VENTXP1	Intron (ENST00000674719/ENSG00000259849, intron 3 of 3)	full_rescue	NA
chrX-26723001-26724000	-30.6122	group_4	ENSG00000259849	VENTXP1	Intron (ENST00000674719/ENSG00000259849, intron 3 of 3)	full_rescue	NA
chrX-26644001-26645000	-80	group_3	ENSG00000259849	VENTXP1	Intron (ENST00000674719/ENSG00000259849, intron 3 of 3)	full_rescue	NA
chrX-26557001-26558000	-30.9477	group_4	ENSG00000259849	VENTXP1	Promoter (<=1kb)	full_rescue	CGI_only
chrX-26398001-26399000	-35.2941	group_4	ENSG00000228464	RP11-617O8.1	Distal Intergenic	full_rescue	NA
chrX-26320001-26321000	-50	group_4	ENSG00000228464	RP11-617O8.1	Distal Intergenic	full_rescue	NA
chrX-26161001-26162000	-25.4096	group_4	ENSG00000232030	MAGEB6P1	Promoter (<=1kb)	full_rescue	NA
chrX-26116001-26117000	-33.3333	group_4	ENSG00000176774	MAGEB18	Distal Intergenic	full_rescue	NA
chrX-25859001-25860000	-57.0785	group_3	ENSG00000233403	RP11-86A5.1	Distal Intergenic	partial_rescue	NA
chrX-2585001-2586000	-38.4449	group_3	ENSG00000277120	MIR6089	Distal Intergenic	full_rescue	CGI_only
chrX-2582001-2583000	-49.3827	group_3	ENSG00000277120	MIR6089	Distal Intergenic	full_rescue	CGI_only
chrX-2578001-2579000	-30.6173	group_3	ENSG00000277120	MIR6089	Distal Intergenic	no_rescue	NA
chrX-2572001-2573000	-28.0426	group_4	ENSG00000277120	MIR6089	Distal Intergenic	full_rescue	NA
chrX-25646001-25647000	-46.706	group_4	ENSG00000228519	RP11-298C3.2	Promoter (<=1kb)	full_rescue	NA
chrX-25645001-25646000	-69.4203	group_3	ENSG00000228519	RP11-298C3.2	Promoter (<=1kb)	full_rescue	NA
chrX-25618001-25619000	-45.4545	group_3	ENSG00000229310	RPP40P1	Distal Intergenic	full_rescue	NA
chrX-25606001-25607000	-37.7778	group_4	ENSG00000229310	RPP40P1	Distal Intergenic	full_rescue	NA
chrX-25533001-25534000	-30.7692	group_4	ENSG00000229310	RPP40P1	Distal Intergenic	full_rescue	NA
chrX-25465001-25466000	-25.7353	group_4	ENSG00000229310	RPP40P1	Distal Intergenic	full_rescue	NA
chrX-25452001-25453000	-35.3982	group_4	ENSG00000229310	RPP40P1	Distal Intergenic	full_rescue	NA
chrX-25377001-25378000	-32.6087	group_4	ENSG00000176812	RP11-629O4.1	Distal Intergenic	full_rescue	NA
chrX-25375001-25376000	-42.493	group_3	ENSG00000176812	RP11-629O4.1	Distal Intergenic	full_rescue	NA
chrX-25358001-25359000	-35.5501	group_4	ENSG00000176812	RP11-629O4.1	Distal Intergenic	full_rescue	NA
chrX-25318001-25319000	-33.429	group_4	ENSG00000176812	RP11-629O4.1	Distal Intergenic	full_rescue	NA
chrX-25315001-25316000	-39.4835	group_4	ENSG00000176812	RP11-629O4.1	Distal Intergenic	full_rescue	NA
chrX-25144001-25145000	-40.9174	group_1	ENSG00000176812	RP11-629O4.1	Distal Intergenic	full_rescue	NA
chrX-2406001-2407000	-59.5238	group_4	ENSG00000169084	DHRSX	Intron (ENST00000334651/ENSG00000169084, intron 3 of 6)	full_rescue	NA
chrX-24027001-24028000	-61.5942	group_3	ENSG00000174010	KLHL15	Promoter (<=1kb)	full_rescue	CGI_only
chrX-23919001-23920000	-67.0968	group_3	ENSG00000165182	CXorf58	Intron (ENST00000379211/ENSG00000165182, intron 5 of 8)	full_rescue	NA
chrX-2391001-2392000	-31.8596	group_4	ENSG00000169084	DHRSX	Intron (ENST00000334651/ENSG00000169084, intron 3 of 6)	full_rescue	NA
chrX-23883001-23884000	-36.2041	group_2	ENSG00000184831	APOO	5' UTR	full_rescue	GH_only
chrX-23872001-23873000	-47.619	group_4	ENSG00000184831	APOO	Intron (ENST00000379226/ENSG00000184831, intron 4 of 8)	full_rescue	NA
chrX-23778001-23779000	-38.7614	group_4	ENSG00000233785	RP13-314C10.5	Intron (ENST00000366134/ENSG00000233785, intron 2 of 2)	full_rescue	GH_only
chrX-2371001-2372000	-35.1679	group_2	ENSG00000169084	DHRSX	Intron (ENST00000334651/ENSG00000169084, intron 3 of 6)	no_rescue	NA
chrX-2370001-2371000	-25.7386	group_4	ENSG00000169084	DHRSX	Intron (ENST00000334651/ENSG00000169084, intron 3 of 6)	partial_rescue	NA
chrX-23619001-23620000	-37.4359	group_4	ENSG00000123131	PRDX4	Distal Intergenic	full_rescue	NA
chrX-2347001-2348000	-34.1463	group_4	ENSG00000169084	DHRSX	Intron (ENST00000334651/ENSG00000169084, intron 3 of 6)	partial_rescue	NA
chrX-23367001-23368000	-25.5814	group_4	ENSG00000165186	PTCHD1	Intron (ENST00000379361/ENSG00000165186, intron 1 of 2)	full_rescue	NA
chrX-23331001-23332000	-37.7381	group_1	ENSG00000165186	PTCHD1	Distal Intergenic	full_rescue	CGI_only
chrX-23185001-23186000	-29.087	group_4	ENSG00000288546	NA	Intron (ENST00000608254/ENSG00000288546, intron 2 of 5)	full_rescue	NA
chrX-23067001-23068000	-39.8261	group_4	ENSG00000288546	NA	Intron (ENST00000608254/ENSG00000288546, intron 2 of 5)	full_rescue	NA
chrX-22791001-22792000	-45.2381	group_3	ENSG00000288546	NA	Intron (ENST00000608254/ENSG00000288546, intron 3 of 5)	partial_rescue	NA
chrX-22754001-22755000	-28.3763	group_4	ENSG00000288546	NA	Intron (ENST00000442155/ENSG00000237019, intron 1 of 1)	full_rescue	NA
chrX-22752001-22753000	-37.8378	group_4	ENSG00000288546	NA	Intron (ENST00000442155/ENSG00000237019, intron 1 of 1)	full_rescue	NA
chrX-226001-227000	-92.0635	group_1	ENSG00000228572	LL0YNC03-29C1.1	Distal Intergenic	no_rescue	CGI_only
chrX-22575001-22576000	-28.3572	group_4	ENSG00000288546	NA	Intron (ENST00000608254/ENSG00000288546, intron 4 of 5)	full_rescue	NA
chrX-22529001-22530000	-54.9872	group_2	ENSG00000288546	NA	Intron (ENST00000608254/ENSG00000288546, intron 4 of 5)	partial_rescue	NA
chrX-22416001-22417000	-32.9787	group_4	ENSG00000288546	NA	Intron (ENST00000608254/ENSG00000288546, intron 4 of 5)	full_rescue	NA
chrX-22277001-22278000	-37.5	group_4	ENSG00000288546	NA	Intron (ENST00000608254/ENSG00000288546, intron 5 of 5)	full_rescue	NA
chrX-22231001-22232000	-41.4634	group_4	ENSG00000102174	PHEX	Intron (ENST00000379374/ENSG00000102174, intron 20 of 21)	full_rescue	NA
chrX-22098001-22099000	-36.2637	group_4	ENSG00000102174	PHEX	Intron (ENST00000379374/ENSG00000102174, intron 8 of 21)	partial_rescue	NA
chrX-22062001-22063000	-25.364	group_4	ENSG00000102174	PHEX	Intron (ENST00000379374/ENSG00000102174, intron 3 of 21)	full_rescue	GH_only
chrX-22025001-22026000	-28.0542	group_4	ENSG00000102174	PHEX	Distal Intergenic	full_rescue	NA
chrX-21960001-21961000	-25.8772	group_4	ENSG00000102172	SMS	Intron (ENST00000404933/ENSG00000102172, intron 1 of 10)	full_rescue	GH_only
chrX-21943001-21944000	-32.8926	group_2	ENSG00000102172	SMS	Intron (ENST00000404933/ENSG00000102172, intron 1 of 10)	full_rescue	CGI_and_GH
chrX-21836001-21837000	-47.619	group_4	ENSG00000012174	MBTPS2	Distal Intergenic	full_rescue	GH_only
chrX-21804001-21805000	-27.7778	group_4	ENSG00000012174	MBTPS2	Distal Intergenic	full_rescue	NA
chrX-21664001-21665000	-34.9237	group_4	ENSG00000185915	KLHL34	Distal Intergenic	full_rescue	NA
chrX-21656001-21657000	-40.7338	group_4	ENSG00000185915	KLHL34	Exon (ENST00000379499/ENSG00000185915, exon 1 of 1)	full_rescue	CGI_only
chrX-21609001-21610000	-45.8333	group_4	ENSG00000149970	CNKSR2	3' UTR	full_rescue	NA
chrX-21556001-21557000	-27.6589	group_4	ENSG00000149970	CNKSR2	Intron (ENST00000642501/ENSG00000149970, intron 10 of 18)	full_rescue	NA
chrX-21555001-21556000	-32.151	group_4	ENSG00000149970	CNKSR2	Intron (ENST00000642501/ENSG00000149970, intron 10 of 18)	partial_rescue	NA
chrX-2146001-2147000	-33.1172	group_4	ENSG00000223571	DHRSX-IT1	Distal Intergenic	full_rescue	NA
chrX-21274001-21275000	-48.4035	group_2	ENSG00000283380	RP11-274G22.1	Intron (ENST00000636317/ENSG00000283380, intron 2 of 8)	full_rescue	NA
chrX-21090001-21091000	-30.8491	group_4	ENSG00000283380	RP11-274G22.1	Intron (ENST00000636317/ENSG00000283380, intron 2 of 8)	full_rescue	NA
chrX-20991001-20992000	-43.7984	group_4	ENSG00000283380	RP11-274G22.1	Intron (ENST00000636678/ENSG00000283380, intron 4 of 7)	full_rescue	NA
chrX-20928001-20929000	-29.5597	group_4	ENSG00000283380	RP11-274G22.1	Intron (ENST00000636678/ENSG00000283380, intron 7 of 7)	partial_rescue	NA
chrX-20805001-20806000	-38.7989	group_4	ENSG00000283380	RP11-274G22.1	Intron (ENST00000636678/ENSG00000283380, intron 7 of 7)	full_rescue	NA
chrX-20783001-20784000	-32.1394	group_4	ENSG00000283380	RP11-274G22.1	Intron (ENST00000636678/ENSG00000283380, intron 7 of 7)	full_rescue	NA
chrX-20492001-20493000	-46.5444	group_3	ENSG00000283400	RP11-203E14.1	Exon (ENST00000636971/ENSG00000283400, exon 4 of 4)	full_rescue	NA
chrX-20480001-20481000	-28.2602	group_4	ENSG00000283400	RP11-203E14.1	Intron (ENST00000636971/ENSG00000283400, intron 3 of 3)	no_rescue	NA
chrX-20388001-20389000	-42.5	group_3	ENSG00000283400	RP11-203E14.1	Distal Intergenic	full_rescue	NA
chrX-20311001-20312000	-76.3889	group_2	ENSG00000283631	RP11-1037J10.1	Exon (ENST00000636738/ENSG00000283631, exon 2 of 2)	full_rescue	NA
chrX-20307001-20308000	-34.255	group_4	ENSG00000283631	RP11-1037J10.1	Distal Intergenic	full_rescue	NA
chrX-20230001-20231000	-32.8491	group_4	ENSG00000177189	RPS6KA3	Intron (ENST00000379565/ENSG00000177189, intron 2 of 21)	full_rescue	NA
chrX-20098001-20099000	-48.1203	group_3	ENSG00000184368	MAP7D2	Intron (ENST00000379651/ENSG00000184368, intron 1 of 15)	full_rescue	NA
chrX-20056001-20057000	-39.4197	group_4	ENSG00000184368	MAP7D2	Exon (ENST00000379651/ENSG00000184368, exon 4 of 16)	full_rescue	NA
chrX-20048001-20049000	-26.6623	group_4	ENSG00000184368	MAP7D2	Intron (ENST00000379651/ENSG00000184368, intron 5 of 15)	full_rescue	NA
chrX-20032001-20033000	-48.1481	group_4	ENSG00000184368	MAP7D2	Intron (ENST00000379651/ENSG00000184368, intron 7 of 15)	full_rescue	NA
chrX-20031001-20032000	-56.25	group_3	ENSG00000184368	MAP7D2	Intron (ENST00000379651/ENSG00000184368, intron 7 of 15)	full_rescue	NA
chrX-20025001-20026000	-30.1683	group_4	ENSG00000184368	MAP7D2	Exon (ENST00000379651/ENSG00000184368, exon 8 of 16)	full_rescue	NA
chrX-19976001-19977000	-55	group_4	ENSG00000173681	CXorf23	Distal Intergenic	full_rescue	NA
chrX-19946001-19947000	-38.402	group_3	ENSG00000173681	CXorf23	Intron (ENST00000379687/ENSG00000173681, intron 7 of 10)	partial_rescue	NA
chrX-19902001-19903000	-40.9962	group_4	ENSG00000147010	SH3KBP1	Distal Intergenic	partial_rescue	NA
chrX-19884001-19885000	-50.1136	group_4	ENSG00000147010	SH3KBP1	Intron (ENST00000397821/ENSG00000147010, intron 1 of 17)	full_rescue	CGI_and_GH
chrX-19814001-19815000	-39.3939	group_2	ENSG00000147010	SH3KBP1	Intron (ENST00000397821/ENSG00000147010, intron 2 of 17)	full_rescue	NA
chrX-19789001-19790000	-76.087	group_3	ENSG00000147010	SH3KBP1	Intron (ENST00000397821/ENSG00000147010, intron 2 of 17)	full_rescue	NA
chrX-19713001-19714000	-27.5	group_4	ENSG00000147010	SH3KBP1	Intron (ENST00000397821/ENSG00000147010, intron 3 of 17)	no_rescue	GH_only
chrX-19712001-19713000	-50	group_4	ENSG00000147010	SH3KBP1	Intron (ENST00000397821/ENSG00000147010, intron 3 of 17)	full_rescue	NA
chrX-19686001-19687000	-60	group_3	ENSG00000147010	SH3KBP1	Intron (ENST00000397821/ENSG00000147010, intron 5 of 17)	full_rescue	GH_only
chrX-19677001-19678000	-30.0535	group_4	ENSG00000147010	SH3KBP1	Intron (ENST00000397821/ENSG00000147010, intron 6 of 17)	full_rescue	GH_only
chrX-19669001-19670000	-42.7586	group_3	ENSG00000147010	SH3KBP1	Intron (ENST00000397821/ENSG00000147010, intron 6 of 17)	full_rescue	GH_only
chrX-19607001-19608000	-29.8507	group_4	ENSG00000147010	SH3KBP1	Exon (ENST00000397821/ENSG00000147010, exon 9 of 18)	full_rescue	NA
chrX-19602001-19603000	-51.0653	group_3	ENSG00000147010	SH3KBP1	Intron (ENST00000397821/ENSG00000147010, intron 9 of 17)	full_rescue	NA
chrX-19555001-19556000	-35.9348	group_2	ENSG00000147010	SH3KBP1	Intron (ENST00000397821/ENSG00000147010, intron 13 of 17)	full_rescue	NA
chrX-19539001-19540000	-35.4331	group_4	ENSG00000147010	SH3KBP1	Intron (ENST00000397821/ENSG00000147010, intron 16 of 17)	full_rescue	NA
chrX-19393001-19394000	-33.8129	group_4	ENSG00000180815	MAP3K15	Intron (ENST00000518578/ENSG00000180815, intron 17 of 29)	partial_rescue	NA
chrX-19342001-19343000	-31.25	group_4	ENSG00000131828	PDHA1	Promoter (<=1kb)	full_rescue	CGI_and_GH
chrX-19278001-19279000	-33.8346	group_4	ENSG00000131828	PDHA1	Distal Intergenic	full_rescue	NA
chrX-19267001-19268000	-41.5584	group_4	ENSG00000131828	PDHA1	Distal Intergenic	no_rescue	NA
chrX-1926001-1927000	-30.0362	group_4	ENSG00000234622	RP13-297E16.5	Distal Intergenic	full_rescue	NA
chrX-19228001-19229000	-48.2407	group_3	ENSG00000173698	ADGRG2	Distal Intergenic	partial_rescue	NA
chrX-19174001-19175000	-35.5357	group_3	ENSG00000173698	ADGRG2	Distal Intergenic	full_rescue	NA
chrX-19161001-19162000	-31.732	group_4	ENSG00000173698	ADGRG2	Distal Intergenic	full_rescue	NA
chrX-19155001-19156000	-26.699	group_4	ENSG00000173698	ADGRG2	Distal Intergenic	full_rescue	NA
chrX-1914001-1915000	-30.0222	group_3	ENSG00000234622	RP13-297E16.5	Distal Intergenic	full_rescue	NA
chrX-19063001-19064000	-27.451	group_4	ENSG00000173698	ADGRG2	Intron (ENST00000379869/ENSG00000173698, intron 3 of 28)	partial_rescue	NA
chrX-19014001-19015000	-63.6364	group_2	ENSG00000286724	NA	Exon (ENST00000379869/ENSG00000173698, exon 16 of 29)	no_rescue	NA
chrX-19013001-19014000	-32.7586	group_4	ENSG00000286724	NA	Exon (ENST00000379869/ENSG00000173698, exon 16 of 29)	partial_rescue	NA
chrX-18975001-18976000	-35.6952	group_3	ENSG00000044446	PHKA2	Intron (ENST00000379942/ENSG00000044446, intron 1 of 32)	partial_rescue	NA
chrX-18927001-18928000	-27.2727	group_4	ENSG00000044446	PHKA2	Intron (ENST00000379942/ENSG00000044446, intron 13 of 32)	partial_rescue	NA
chrX-18923001-18924000	-44.7368	group_4	ENSG00000044446	PHKA2	Intron (ENST00000379942/ENSG00000044446, intron 17 of 32)	full_rescue	NA
chrX-18908001-18909000	-32.2581	group_4	ENSG00000044446	PHKA2	Exon (ENST00000379942/ENSG00000044446, exon 21 of 33)	full_rescue	NA
chrX-18884001-18885000	-31.5152	group_4	ENSG00000237836	PHKA2-AS1	Distal Intergenic	full_rescue	NA
chrX-18733001-18734000	-31.6605	group_4	ENSG00000086717	PPEF1	5' UTR	full_rescue	NA
chrX-18682001-18683000	-27.0661	group_4	ENSG00000086717	PPEF1	Intron (ENST00000486029/ENSG00000086717, intron 1 of 3)	full_rescue	NA
chrX-18659001-18660000	-28.0962	group_4	ENSG00000102104	RS1	Intron (ENST00000379984/ENSG00000102104, intron 1 of 5)	no_rescue	NA
chrX-18652001-18653000	-32.6825	group_4	ENSG00000008086	CDKL5	Intron (ENST00000379996/ENSG00000008086, intron 20 of 20)	partial_rescue	NA
chrX-18644001-18645000	-28.4596	group_4	ENSG00000008086	CDKL5	Exon (ENST00000379984/ENSG00000102104, exon 5 of 6)	full_rescue	NA
chrX-18607001-18608000	-32.7851	group_4	ENSG00000008086	CDKL5	Intron (ENST00000379996/ENSG00000008086, intron 12 of 20)	partial_rescue	NA
chrX-18558001-18559000	-69.2308	group_4	ENSG00000008086	CDKL5	Intron (ENST00000379996/ENSG00000008086, intron 3 of 20)	full_rescue	NA
chrX-18515001-18516000	-28.9111	group_4	ENSG00000008086	CDKL5	Intron (ENST00000379996/ENSG00000008086, intron 3 of 20)	full_rescue	NA
chrX-18445001-18446000	-54.8611	group_3	ENSG00000008086	CDKL5	Intron (ENST00000379996/ENSG00000008086, intron 1 of 20)	full_rescue	NA
chrX-18400001-18401000	-53	group_3	ENSG00000207025	Y_RNA	Distal Intergenic	no_rescue	NA
chrX-18396001-18397000	-37.5	group_4	ENSG00000207025	Y_RNA	Promoter (<=1kb)	full_rescue	NA
chrX-18365001-18366000	-27.9149	group_4	ENSG00000102098	SCML2	Distal Intergenic	full_rescue	NA
chrX-18316001-18317000	-35.4184	group_4	ENSG00000102098	SCML2	Intron (ENST00000251900/ENSG00000102098, intron 6 of 14)	full_rescue	NA
chrX-18302001-18303000	-34.9826	group_4	ENSG00000102098	SCML2	Intron (ENST00000251900/ENSG00000102098, intron 7 of 14)	full_rescue	NA
chrX-18275001-18276000	-59.2411	group_3	ENSG00000102098	SCML2	Intron (ENST00000251900/ENSG00000102098, intron 7 of 14)	full_rescue	NA
chrX-18273001-18274000	-46.8599	group_3	ENSG00000102098	SCML2	Intron (ENST00000251900/ENSG00000102098, intron 7 of 14)	full_rescue	NA
chrX-18220001-18221000	-28.2737	group_4	ENSG00000177324	BEND2	Promoter (<=1kb)	full_rescue	CGI_only
chrX-18207001-18208000	-27.2485	group_4	ENSG00000177324	BEND2	Intron (ENST00000380033/ENSG00000177324, intron 4 of 13)	full_rescue	NA
chrX-18206001-18207000	-30.976	group_4	ENSG00000177324	BEND2	Intron (ENST00000380033/ENSG00000177324, intron 4 of 13)	full_rescue	NA
chrX-18116001-18117000	-40.8392	group_3	ENSG00000225882	LINC01456	Distal Intergenic	no_rescue	NA
chrX-18098001-18099000	-31.8662	group_1	ENSG00000225882	LINC01456	Intron (ENST00000453902/ENSG00000225882, intron 1 of 4)	full_rescue	NA
chrX-18050001-18051000	-39.7076	group_3	ENSG00000225882	LINC01456	Intron (ENST00000453902/ENSG00000225882, intron 1 of 4)	full_rescue	NA
chrX-17969001-17970000	-52.2559	group_4	ENSG00000225066	RP1-272E8.1	Downstream (<1kb)	full_rescue	NA
chrX-17948001-17949000	-52.9412	group_4	ENSG00000225066	RP1-272E8.1	Distal Intergenic	full_rescue	NA
chrX-17914001-17915000	-33.5719	group_4	ENSG00000276467	RP1-272E8.2	Distal Intergenic	full_rescue	NA
chrX-17897001-17898000	-37.3777	group_3	ENSG00000276467	RP1-272E8.2	Exon (ENST00000615011/ENSG00000276467, exon 1 of 1)	partial_rescue	NA
chrX-17883001-17884000	-54.9934	group_4	ENSG00000276467	RP1-272E8.2	Distal Intergenic	full_rescue	NA
chrX-17882001-17883000	-48.8372	group_4	ENSG00000276467	RP1-272E8.2	Distal Intergenic	full_rescue	NA
chrX-17866001-17867000	-34.9462	group_4	ENSG00000131831	RAI2	Distal Intergenic	full_rescue	NA
chrX-17865001-17866000	-30.8015	group_3	ENSG00000131831	RAI2	Distal Intergenic	full_rescue	NA
chrX-17838001-17839000	-37.2136	group_4	ENSG00000131831	RAI2	Intron (ENST00000415486/ENSG00000131831, intron 1 of 2)	full_rescue	NA
chrX-17837001-17838000	-52.551	group_3	ENSG00000131831	RAI2	5' UTR	full_rescue	NA
chrX-17769001-17770000	-35.3126	group_4	ENSG00000227873	RP3-389A20.2	Promoter (<=1kb)	full_rescue	NA
chrX-17765001-17766000	-41.3793	group_4	ENSG00000227873	RP3-389A20.2	Distal Intergenic	full_rescue	NA
chrX-17747001-17748000	-27.3743	group_4	ENSG00000047634	SCML1	Intron (ENST00000398080/ENSG00000047634, intron 2 of 5)	full_rescue	NA
chrX-17635001-17636000	-42.1922	group_1	ENSG00000188158	NHS	5' UTR	full_rescue	NA
chrX-17612001-17613000	-36.6097	group_3	ENSG00000188158	NHS	Intron (ENST00000676302/ENSG00000188158, intron 1 of 8)	full_rescue	NA
chrX-17584001-17585000	-77.7778	group_3	ENSG00000188158	NHS	Intron (ENST00000676302/ENSG00000188158, intron 1 of 8)	full_rescue	GH_only
chrX-17542001-17543000	-53.3333	group_4	ENSG00000188158	NHS	Intron (ENST00000676302/ENSG00000188158, intron 1 of 8)	full_rescue	NA
chrX-17537001-17538000	-34.9164	group_2	ENSG00000188158	NHS	Intron (ENST00000676302/ENSG00000188158, intron 1 of 8)	full_rescue	NA
chrX-17456001-17457000	-39.3809	group_3	ENSG00000188158	NHS	Intron (ENST00000676302/ENSG00000188158, intron 1 of 8)	full_rescue	NA
chrX-17435001-17436000	-33.4953	group_4	ENSG00000188158	NHS	Intron (ENST00000676302/ENSG00000188158, intron 1 of 8)	full_rescue	NA
chrX-17416001-17417000	-38.1356	group_1	ENSG00000188158	NHS	Intron (ENST00000676302/ENSG00000188158, intron 1 of 8)	full_rescue	GH_only
chrX-17324001-17325000	-29.3103	group_4	ENSG00000238764	snoU13	Distal Intergenic	full_rescue	NA
chrX-17145001-17146000	-38.75	group_4	ENSG00000169891	REPS2	Intron (ENST00000357277/ENSG00000169891, intron 17 of 17)	full_rescue	NA
chrX-17110001-17111000	-52.1739	group_4	ENSG00000169891	REPS2	Intron (ENST00000357277/ENSG00000169891, intron 14 of 17)	full_rescue	NA
chrX-17083001-17084000	-46.5116	group_4	ENSG00000169891	REPS2	Intron (ENST00000357277/ENSG00000169891, intron 13 of 17)	full_rescue	NA
chrX-16739001-16740000	-27.4232	group_4	ENSG00000169895	SYAP1	Intron (ENST00000380155/ENSG00000169895, intron 3 of 8)	full_rescue	NA
chrX-16198001-16199000	-54.1667	group_4	ENSG00000215313	RPL6P30	Promoter (<=1kb)	full_rescue	GH_only
chrX-156027001-156028000	-26.2559	group_4	ENSG00000227159	DDX11L16	Promoter (<=1kb)	full_rescue	NA
chrX-156025001-156026000	-40.7063	group_4	ENSG00000182484	WASH6P	Exon (ENST00000359512/ENSG00000182484, exon 9 of 10)	full_rescue	NA
chrX-156016001-156017000	-66.5934	group_2	ENSG00000185203	WASIR1	Promoter (<=1kb)	partial_rescue	CGI_only
chrX-155977001-155978000	-46.0498	group_3	ENSG00000228410	TCEB1P24	Downstream (<1kb)	full_rescue	NA
chrX-155942001-155943000	-55.303	group_4	ENSG00000124333	VAMP7	3' UTR	full_rescue	NA
chrX-155880001-155881000	-50.7788	group_3	ENSG00000124333	VAMP7	Promoter (<=1kb)	partial_rescue	CGI_only
chrX-155874001-155875000	-71.47	group_2	ENSG00000237040	DPH3P2	Promoter (<=1kb)	no_rescue	NA
chrX-155833001-155834000	-33.3978	group_2	ENSG00000237801	AMD1P2	Distal Intergenic	full_rescue	NA
chrX-155775001-155776000	-53.6364	group_3	ENSG00000168939	SPRY3	3' UTR	full_rescue	NA
chrX-155773001-155774000	-34.4828	group_4	ENSG00000168939	SPRY3	5' UTR	partial_rescue	NA
chrX-155714001-155715000	-38.0515	group_4	ENSG00000185973	TMLHE	Intron (ENST00000676089/ENSG00000168939, intron 1 of 1)	full_rescue	NA
chrX-155684001-155685000	-51.2821	group_3	ENSG00000185973	TMLHE	Intron (ENST00000676089/ENSG00000168939, intron 1 of 1)	full_rescue	NA
chrX-155679001-155680000	-40	group_4	ENSG00000185973	TMLHE	Intron (ENST00000676089/ENSG00000168939, intron 1 of 1)	full_rescue	NA
chrX-155534001-155535000	-34.4828	group_4	ENSG00000224533	TMLHE-AS1	Intron (ENST00000452506/ENSG00000224533, intron 1 of 1)	full_rescue	NA
chrX-155522001-155523000	-48.5714	group_4	ENSG00000224533	TMLHE-AS1	Intron (ENST00000452506/ENSG00000224533, intron 1 of 1)	full_rescue	NA
chrX-155314001-155315000	-80.7843	group_3	ENSG00000155962	CLIC2	Intron (ENST00000369449/ENSG00000155962, intron 1 of 5)	full_rescue	NA
chrX-155313001-155314000	-74.1259	group_2	ENSG00000155962	CLIC2	Intron (ENST00000369449/ENSG00000155962, intron 1 of 5)	full_rescue	NA
chrX-155237001-155238000	-30.4487	group_4	ENSG00000155959	VBP1	Intron (ENST00000535916/ENSG00000155959, intron 6 of 6)	full_rescue	NA
chrX-155053001-155054000	-39.6581	group_2	ENSG00000165775	FUNDC2	Intron (ENST00000369498/ENSG00000165775, intron 4 of 4)	partial_rescue	NA
chrX-155024001-155025000	-42.1039	group_4	ENSG00000185010	F8	Intron (ENST00000423959/ENSG00000185010, intron 1 of 5)	full_rescue	CGI_and_GH
chrX-154979001-154980000	-31.6424	group_4	ENSG00000185010	F8	Intron (ENST00000360256/ENSG00000185010, intron 6 of 25)	full_rescue	NA
chrX-154939001-154940000	-31.6844	group_4	ENSG00000185010	F8	Intron (ENST00000360256/ENSG00000185010, intron 13 of 25)	full_rescue	NA
chrX-154924001-154925000	-30.1601	group_4	ENSG00000185010	F8	Intron (ENST00000360256/ENSG00000185010, intron 14 of 25)	full_rescue	NA
chrX-154775001-154776000	-45.6173	group_3	ENSG00000130826	DKC1	3' UTR	partial_rescue	NA
chrX-154737001-154738000	-28.0039	group_4	ENSG00000160219	GAB3	Intron (ENST00000424127/ENSG00000160219, intron 1 of 9)	full_rescue	GH_only
chrX-154729001-154730000	-65.7895	group_4	ENSG00000160219	GAB3	Intron (ENST00000424127/ENSG00000160219, intron 1 of 9)	full_rescue	GH_only
chrX-154719001-154720000	-31.7231	group_4	ENSG00000160219	GAB3	Intron (ENST00000424127/ENSG00000160219, intron 1 of 9)	full_rescue	GH_only
chrX-154675001-154676000	-42.3451	group_4	ENSG00000160219	GAB3	3' UTR	full_rescue	NA
chrX-154663001-154664000	-63.9815	group_3	ENSG00000237619	OR3B1P	Distal Intergenic	full_rescue	NA
chrX-154601001-154602000	-35.2344	group_4	ENSG00000232155	AF277315.19	Distal Intergenic	full_rescue	NA
chrX-154552001-154553000	-36.3636	group_4	ENSG00000269335	IKBKG	5' UTR	full_rescue	NA
chrX-154551001-154552000	-40.1887	group_3	ENSG00000269335	IKBKG	5' UTR	full_rescue	GH_only
chrX-154535001-154536000	-36.828	group_1	ENSG00000160211	G6PD	Exon (ENST00000393562/ENSG00000160211, exon 4 of 13)	full_rescue	NA
chrX-154533001-154534000	-56.25	group_4	ENSG00000160211	G6PD	Exon (ENST00000393562/ENSG00000160211, exon 8 of 13)	full_rescue	NA
chrX-154511001-154512000	-30.5896	group_4	ENSG00000071889	FAM3A	3' UTR	full_rescue	GH_only
chrX-154508001-154509000	-32.2403	group_4	ENSG00000071889	FAM3A	3' UTR	full_rescue	CGI_only
chrX-154507001-154508000	-32.6733	group_4	ENSG00000071889	FAM3A	3' UTR	full_rescue	CGI_only
chrX-154505001-154506000	-43.9313	group_4	ENSG00000264484	RN7SL697P	Downstream (<1kb)	full_rescue	CGI_only
chrX-154502001-154503000	-28.0385	group_4	ENSG00000264484	RN7SL697P	Distal Intergenic	full_rescue	NA
chrX-154494001-154495000	-49.6252	group_3	ENSG00000264484	RN7SL697P	Downstream (<1kb)	full_rescue	NA
chrX-154491001-154492000	-51.7094	group_3	ENSG00000126903	SLC10A3	Promoter (<=1kb)	full_rescue	CGI_only
chrX-154469001-154470000	-25.276	group_4	ENSG00000130827	PLXNA3	Exon (ENST00000369682/ENSG00000130827, exon 26 of 33)	full_rescue	CGI_only
chrX-154448001-154449000	-25.759	group_4	ENSG00000071859	FAM50A	Exon (ENST00000393600/ENSG00000071859, exon 5 of 13)	full_rescue	GH_only
chrX-154413001-154414000	-58.9041	group_4	ENSG00000102125	TAZ	5' UTR	full_rescue	CGI_and_GH
chrX-154409001-154410000	-28.2782	group_2	ENSG00000147403	RPL10	5' UTR	full_rescue	CGI_and_GH
chrX-154401001-154402000	-36.8475	group_3	ENSG00000147403	RPL10	3' UTR	full_rescue	GH_only
chrX-154400001-154401000	-27.4389	group_4	ENSG00000207165	SNORA70	Promoter (<=1kb)	full_rescue	CGI_and_GH
chrX-154358001-154359000	-46.0784	group_3	ENSG00000196924	FLNA	3' UTR	partial_rescue	CGI_only
chrX-154322001-154323000	-38.2979	group_4	ENSG00000007350	TKTL1	Intron (ENST00000369915/ENSG00000007350, intron 8 of 12)	full_rescue	NA
chrX-154302001-154303000	-45.6371	group_3	ENSG00000007350	TKTL1	Intron (ENST00000369915/ENSG00000007350, intron 1 of 12)	full_rescue	NA
chrX-154297001-154298000	-29.1126	group_4	ENSG00000007350	TKTL1	Intron (ENST00000369915/ENSG00000007350, intron 1 of 12)	full_rescue	CGI_only
chrX-154240001-154241000	-40.0489	group_4	ENSG00000277009	CH17-128G5.1	Intron (ENST00000621631/ENSG00000277009, intron 1 of 2)	full_rescue	NA
chrX-154235001-154236000	-25.1982	group_4	ENSG00000277009	CH17-128G5.1	Intron (ENST00000621631/ENSG00000277009, intron 1 of 2)	full_rescue	NA
chrX-154207001-154208000	-51.7241	group_4	ENSG00000274962	TEX28P1	Intron (ENST00000613479/ENSG00000274962, intron 1 of 2)	partial_rescue	NA
chrX-154122001-154123000	-27.8683	group_4	ENSG00000169057	MECP2	Intron (ENST00000631210/ENSG00000169057, intron 1 of 2)	full_rescue	GH_only
chrX-154121001-154122000	-33.7044	group_4	ENSG00000169057	MECP2	Intron (ENST00000631210/ENSG00000169057, intron 1 of 2)	full_rescue	GH_only
chrX-154044001-154045000	-70.4545	group_3	ENSG00000169057	MECP2	Intron (ENST00000303391/ENSG00000169057, intron 2 of 3)	full_rescue	GH_only
chrX-154023001-154024000	-100	group_2	ENSG00000169057	MECP2	3' UTR	full_rescue	NA
chrX-154020001-154021000	-30.0767	group_4	ENSG00000284286	NA	Promoter (<=1kb)	full_rescue	CGI_only
chrX-153988001-153989000	-84.2105	group_3	ENSG00000283694	MIR3202-2	Distal Intergenic	full_rescue	GH_only
chrX-153984001-153985000	-34.7826	group_4	ENSG00000283694	MIR3202-2	Distal Intergenic	full_rescue	CGI_and_GH
chrX-153948001-153949000	-44.8387	group_3	ENSG00000172534	HCFC1	3' UTR	full_rescue	NA
chrX-153924001-153925000	-32.7137	group_4	ENSG00000089820	ARHGAP4	Intron (ENST00000393721/ENSG00000089820, intron 1 of 18)	full_rescue	CGI_and_GH
chrX-153923001-153924000	-26.3124	group_3	ENSG00000089820	ARHGAP4	Intron (ENST00000393721/ENSG00000089820, intron 1 of 18)	full_rescue	GH_only
chrX-153922001-153923000	-37.0981	group_4	ENSG00000089820	ARHGAP4	5' UTR	full_rescue	GH_only
chrX-153909001-153910000	-40.0942	group_3	ENSG00000284987	NA	Promoter (<=1kb)	full_rescue	NA
chrX-153893001-153894000	-36.6439	group_4	ENSG00000284987	NA	Intron (ENST00000464967/ENSG00000284987, intron 1 of 4)	full_rescue	NA
chrX-153884001-153885000	-50.3723	group_4	ENSG00000198910	L1CAM	Exon (ENST00000618311/ENSG00000273769, exon 3 of 7)	full_rescue	CGI_and_GH
chrX-153878001-153879000	-25.9494	group_3	ENSG00000198910	L1CAM	Intron (ENST00000370060/ENSG00000198910, intron 1 of 28)	full_rescue	NA
chrX-153872001-153873000	-34.5355	group_4	ENSG00000198910	L1CAM	3' UTR	full_rescue	NA
chrX-153863001-153864000	-25.101	group_4	ENSG00000198910	L1CAM	Exon (ENST00000361981/ENSG00000198910, exon 24 of 26)	full_rescue	NA
chrX-153832001-153833000	-31.1241	group_4	ENSG00000067840	PDZD4	Promoter (1-2kb)	full_rescue	CGI_and_GH
chrX-153821001-153822000	-33.2004	group_3	ENSG00000067840	PDZD4	Intron (ENST00000164640/ENSG00000067840, intron 1 of 7)	partial_rescue	CGI_and_GH
chrX-153812001-153813000	-31.401	group_3	ENSG00000067840	PDZD4	Intron (ENST00000164640/ENSG00000067840, intron 1 of 7)	partial_rescue	NA
chrX-153810001-153811000	-25.389	group_4	ENSG00000067840	PDZD4	Intron (ENST00000164640/ENSG00000067840, intron 1 of 7)	full_rescue	NA
chrX-153802001-153803000	-25.5319	group_4	ENSG00000067840	PDZD4	3' UTR	full_rescue	CGI_only
chrX-153798001-153799000	-39.3333	group_4	ENSG00000180879	SSR4	3' UTR	full_rescue	NA
chrX-153782001-153783000	-29.4607	group_4	ENSG00000184343	SRPK3	Exon (ENST00000489426/ENSG00000184343, exon 11 of 21)	full_rescue	CGI_and_GH
chrX-153722001-153723000	-35.3623	group_4	ENSG00000185825	BCAP31	Intron (ENST00000458587/ENSG00000185825, intron 2 of 7)	full_rescue	CGI_only
chrX-153705001-153706000	-33.5369	group_4	ENSG00000185825	BCAP31	Exon (ENST00000646514/ENSG00000185825, exon 1 of 6)	full_rescue	GH_only
chrX-153691001-153692000	-44.7917	group_4	ENSG00000130821	SLC6A8	Exon (ENST00000253122/ENSG00000130821, exon 3 of 13)	full_rescue	CGI_and_GH
chrX-153683001-153684000	-25.641	group_4	ENSG00000130822	PNCK	Intron (ENST00000488994/ENSG00000130822, intron 1 of 9)	full_rescue	GH_only
chrX-153680001-153681000	-55.8974	group_3	ENSG00000130822	PNCK	Intron (ENST00000488994/ENSG00000130822, intron 1 of 9)	full_rescue	GH_only
chrX-153657001-153658000	-27.8261	group_3	ENSG00000237793	RPL18AP16	Distal Intergenic	full_rescue	NA
chrX-153656001-153657000	-31.5789	group_4	ENSG00000237793	RPL18AP16	Distal Intergenic	full_rescue	NA
chrX-153646001-153647000	-39.5238	group_3	ENSG00000130829	DUSP9	Intron (ENST00000477033/ENSG00000130829, intron 1 of 2)	no_rescue	CGI_and_GH
chrX-153645001-153646000	-66.6667	group_3	ENSG00000130829	DUSP9	Intron (ENST00000477033/ENSG00000130829, intron 1 of 2)	no_rescue	CGI_and_GH
chrX-153618001-153619000	-47.0652	group_3	ENSG00000217889	KRT18P48	Distal Intergenic	full_rescue	GH_only
chrX-153593001-153594000	-31.4873	group_4	ENSG00000262919	FAM58A	Intron (ENST00000576892/ENSG00000262919, intron 3 of 4)	full_rescue	NA
chrX-153578001-153579000	-26.621	group_3	ENSG00000067842	ATP2B3	Intron (ENST00000349466/ENSG00000067842, intron 20 of 20)	full_rescue	NA
chrX-153576001-153577000	-29.9118	group_2	ENSG00000067842	ATP2B3	Intron (ENST00000349466/ENSG00000067842, intron 20 of 20)	full_rescue	NA
chrX-153561001-153562000	-29.7521	group_4	ENSG00000067842	ATP2B3	Intron (ENST00000349466/ENSG00000067842, intron 18 of 20)	full_rescue	NA
chrX-153549001-153550000	-49.1558	group_3	ENSG00000067842	ATP2B3	Exon (ENST00000349466/ENSG00000067842, exon 10 of 21)	partial_rescue	NA
chrX-153517001-153518000	-31.5506	group_2	ENSG00000067842	ATP2B3	Promoter (<=1kb)	full_rescue	CGI_only
chrX-153482001-153483000	-28.9491	group_4	ENSG00000213397	HAUS7	Exon (ENST00000635752/ENSG00000224963, exon 5 of 9)	full_rescue	NA
chrX-153478001-153479000	-29.8461	group_4	ENSG00000213397	HAUS7	Intron (ENST00000370210/ENSG00000213397, intron 1 of 5)	full_rescue	NA
chrX-153477001-153478000	-26.787	group_4	ENSG00000213397	HAUS7	Intron (ENST00000370210/ENSG00000213397, intron 1 of 5)	partial_rescue	CGI_only
chrX-153462001-153463000	-37.4332	group_4	ENSG00000183479	TREX2	5' UTR	full_rescue	GH_only
chrX-153460001-153461000	-42.2535	group_4	ENSG00000183479	TREX2	Intron (ENST00000330912/ENSG00000183479, intron 4 of 12)	full_rescue	GH_only
chrX-153435001-153436000	-27.7906	group_4	ENSG00000189420	ZFP92	Distal Intergenic	full_rescue	NA
chrX-153424001-153425000	-43.5185	group_3	ENSG00000189420	ZFP92	3' UTR	full_rescue	NA
chrX-153418001-153419000	-42.0361	group_3	ENSG00000189420	ZFP92	Promoter (<=1kb)	full_rescue	CGI_only
chrX-153417001-153418000	-32.309	group_4	ENSG00000189420	ZFP92	Promoter (<=1kb)	full_rescue	NA
chrX-153416001-153417000	-41.453	group_4	ENSG00000189420	ZFP92	Promoter (1-2kb)	full_rescue	NA
chrX-153410001-153411000	-28.4028	group_4	ENSG00000265170	RN7SL667P	Distal Intergenic	full_rescue	CGI_only
chrX-153401001-153402000	-25.9711	group_4	ENSG00000214897	U82695.5	Promoter (<=1kb)	full_rescue	CGI_only
chrX-1534001-1535000	-55.2381	group_2	ENSG00000182162	P2RY8	Intron (ENST00000381297/ENSG00000182162, intron 1 of 1)	full_rescue	CGI_only
chrX-153355001-153356000	-66.1538	group_3	ENSG00000232249	LL0XNC01-37G1.2	Promoter (<=1kb)	partial_rescue	NA
chrX-153353001-153354000	-92.1053	group_3	ENSG00000063587	ZNF275	Intron (ENST00000438239/ENSG00000063587, intron 1 of 2)	full_rescue	NA
chrX-153337001-153338000	-64.2208	group_3	ENSG00000063587	ZNF275	Intron (ENST00000370249/ENSG00000063587, intron 1 of 2)	full_rescue	GH_only
chrX-153321001-153322000	-55.1491	group_2	ENSG00000225110	LL0XNC01-16G2.1	Promoter (<=1kb)	full_rescue	CGI_only
chrX-153234001-153235000	-26.1538	group_4	ENSG00000273877	RP11-635O16.2	Distal Intergenic	full_rescue	NA
chrX-153225001-153226000	-38.4615	group_4	ENSG00000273877	RP11-635O16.2	Promoter (<=1kb)	full_rescue	NA
chrX-153219001-153220000	-49.3217	group_4	ENSG00000273877	RP11-635O16.2	Distal Intergenic	full_rescue	NA
chrX-153216001-153217000	-27.6437	group_4	ENSG00000273877	RP11-635O16.2	Distal Intergenic	full_rescue	NA
chrX-153188001-153189000	-29.0235	group_4	ENSG00000198681	MAGEA1	Distal Intergenic	full_rescue	NA
chrX-153166001-153167000	-38.8448	group_4	ENSG00000198681	MAGEA1	Distal Intergenic	full_rescue	NA
chrX-153100001-153101000	-34.2999	group_4	ENSG00000268883	PNMA6B	Distal Intergenic	full_rescue	NA
chrX-153099001-153100000	-26.7545	group_4	ENSG00000268883	PNMA6B	Distal Intergenic	full_rescue	NA
chrX-153096001-153097000	-35.6975	group_4	ENSG00000268883	PNMA6B	Distal Intergenic	full_rescue	NA
chrX-153088001-153089000	-38.7675	group_4	ENSG00000268883	PNMA6B	Distal Intergenic	full_rescue	NA
chrX-153058001-153059000	-41.9158	group_4	ENSG00000183837	PNMA3	3' UTR	full_rescue	CGI_and_GH
chrX-153055001-153056000	-38.1703	group_3	ENSG00000183837	PNMA3	Promoter (<=1kb)	full_rescue	CGI_and_GH
chrX-153033001-153034000	-30.6795	group_3	ENSG00000234200	U82671.8	Distal Intergenic	full_rescue	GH_only
chrX-153028001-153029000	-28.1426	group_4	ENSG00000234200	U82671.8	Promoter (<=1kb)	full_rescue	NA
chrX-153021001-153022000	-28.9986	group_3	ENSG00000234200	U82671.8	Distal Intergenic	full_rescue	NA
chrX-152993001-152994000	-28.7234	group_4	ENSG00000198883	PNMA5	Promoter (<=1kb)	full_rescue	CGI_only
chrX-152990001-152991000	-30.9404	group_4	ENSG00000198883	PNMA5	3' UTR	full_rescue	GH_only
chrX-152989001-152990000	-41.2749	group_3	ENSG00000198883	PNMA5	3' UTR	full_rescue	GH_only
chrX-152975001-152976000	-71.4286	group_3	ENSG00000198883	PNMA5	Distal Intergenic	full_rescue	NA
chrX-152964001-152965000	-33.3333	group_4	ENSG00000147394	ZNF185	Intron (ENST00000318504/ENSG00000147394, intron 16 of 20)	full_rescue	NA
chrX-152947001-152948000	-28.5714	group_4	ENSG00000147394	ZNF185	Intron (ENST00000318504/ENSG00000147394, intron 14 of 20)	full_rescue	NA
chrX-152944001-152945000	-34.0498	group_4	ENSG00000147394	ZNF185	Intron (ENST00000318504/ENSG00000147394, intron 13 of 20)	full_rescue	GH_only
chrX-152936001-152937000	-56.8182	group_3	ENSG00000147394	ZNF185	Exon (ENST00000535861/ENSG00000147394, exon 15 of 24)	partial_rescue	NA
chrX-152932001-152933000	-27.1318	group_4	ENSG00000147394	ZNF185	Exon (ENST00000318504/ENSG00000147394, exon 12 of 21)	full_rescue	NA
chrX-152924001-152925000	-50.9259	group_3	ENSG00000147394	ZNF185	Intron (ENST00000318504/ENSG00000147394, intron 10 of 20)	full_rescue	NA
chrX-152921001-152922000	-37.8472	group_3	ENSG00000147394	ZNF185	Intron (ENST00000318504/ENSG00000147394, intron 9 of 20)	full_rescue	GH_only
chrX-152883001-152884000	-49.5238	group_3	ENSG00000147394	ZNF185	Distal Intergenic	full_rescue	NA
chrX-152877001-152878000	-37.2847	group_4	ENSG00000147394	ZNF185	Distal Intergenic	partial_rescue	NA
chrX-152825001-152826000	-30.7413	group_3	ENSG00000147400	CETN2	Downstream (<1kb)	full_rescue	NA
chrX-152822001-152823000	-40.4444	group_4	ENSG00000147400	CETN2	Distal Intergenic	full_rescue	NA
chrX-152818001-152819000	-34.8481	group_3	ENSG00000147400	CETN2	Distal Intergenic	full_rescue	NA
chrX-152814001-152815000	-48.7816	group_3	ENSG00000147400	CETN2	Distal Intergenic	full_rescue	NA
chrX-152766001-152767000	-42.6815	group_4	ENSG00000197172	MAGEA6	3' UTR	partial_rescue	NA
chrX-152734001-152735000	-28.2808	group_4	ENSG00000213401	MAGEA12	Promoter (<=1kb)	full_rescue	NA
chrX-152669001-152670000	-34.0476	group_2	ENSG00000287394	NA	Intron (ENST00000671457/ENSG00000287394, intron 2 of 4)	full_rescue	NA
chrX-152635001-152636000	-68.5048	group_3	ENSG00000287394	NA	Exon (ENST00000671457/ENSG00000287394, exon 4 of 5)	full_rescue	CGI_only
chrX-152630001-152631000	-33.3507	group_4	ENSG00000287394	NA	Intron (ENST00000671457/ENSG00000287394, intron 4 of 4)	full_rescue	NA
chrX-152628001-152629000	-47.1591	group_3	ENSG00000287394	NA	Intron (ENST00000671457/ENSG00000287394, intron 4 of 4)	full_rescue	NA
chrX-152601001-152602000	-41.7647	group_3	ENSG00000287394	NA	Intron (ENST00000671457/ENSG00000287394, intron 4 of 4)	full_rescue	NA
chrX-152582001-152583000	-35.9524	group_4	ENSG00000287394	NA	Intron (ENST00000671457/ENSG00000287394, intron 4 of 4)	partial_rescue	NA
chrX-152561001-152562000	-46.9565	group_4	ENSG00000268089	GABRQ	Distal Intergenic	full_rescue	NA
chrX-152536001-152537000	-39.8867	group_4	ENSG00000223940	KRT8P8	Distal Intergenic	full_rescue	NA
chrX-152509001-152510000	-43.7751	group_3	ENSG00000223940	KRT8P8	Distal Intergenic	full_rescue	NA
chrX-152326001-152327000	-26.8726	group_4	ENSG00000011677	GABRA3	Intron (ENST00000370314/ENSG00000011677, intron 3 of 9)	full_rescue	NA
chrX-152325001-152326000	-35.1744	group_4	ENSG00000011677	GABRA3	Intron (ENST00000370314/ENSG00000011677, intron 3 of 9)	partial_rescue	NA
chrX-15231001-15232000	-38.4615	group_4	ENSG00000102048	ASB9	Distal Intergenic	full_rescue	NA
chrX-152308001-152309000	-26.5625	group_4	ENSG00000011677	GABRA3	Intron (ENST00000370314/ENSG00000011677, intron 3 of 9)	partial_rescue	NA
chrX-15230001-15231000	-31.0345	group_4	ENSG00000102048	ASB9	Distal Intergenic	partial_rescue	NA
chrX-152295001-152296000	-25.3565	group_4	ENSG00000011677	GABRA3	Intron (ENST00000370314/ENSG00000011677, intron 3 of 9)	full_rescue	NA
chrX-152137001-152138000	-29.5789	group_4	ENSG00000266560	RP11-1007I13.4	Promoter (<=1kb)	full_rescue	NA
chrX-152115001-152116000	-30.9262	group_4	ENSG00000242520	MAGEA5	Promoter (<=1kb)	full_rescue	NA
chrX-151987001-151988000	-47.1248	group_4	ENSG00000102287	GABRE	Distal Intergenic	full_rescue	GH_only
chrX-151985001-151986000	-27.8261	group_4	ENSG00000102287	GABRE	Distal Intergenic	full_rescue	GH_only
chrX-151984001-151985000	-50.5753	group_3	ENSG00000102287	GABRE	Distal Intergenic	partial_rescue	GH_only
chrX-151982001-151983000	-58.8235	group_4	ENSG00000102287	GABRE	Distal Intergenic	full_rescue	GH_only
chrX-151976001-151977000	-100	group_3	ENSG00000102287	GABRE	Promoter (1-2kb)	full_rescue	CGI_and_GH
[truncated: 24,032 more rows]

## Sheet: pG_WT1_hypoDMRs
HypoDMR_position	HypoDMR_score	Group	ENSG	gene_name	Annotation	DMR_Rescue_category	Regulatory_elements
chrY-56884001-56885000	-36.1303	group_3	ENSG00000235857	CTBP2P1	Distal Intergenic	full_rescue	NA
chrY-56880001-56881000	-33.4154	group_3	ENSG00000235857	CTBP2P1	Distal Intergenic	full_rescue	NA
chrY-56874001-56875000	-35.488	group_4	ENSG00000235857	CTBP2P1	Distal Intergenic	full_rescue	NA
chrY-56867001-56868000	-43.1159	group_2	ENSG00000235857	CTBP2P1	Distal Intergenic	full_rescue	NA
chrY-56862001-56863000	-37.9696	group_2	ENSG00000235857	CTBP2P1	Distal Intergenic	full_rescue	NA
chrY-56861001-56862000	-53.4677	group_2	ENSG00000235857	CTBP2P1	Distal Intergenic	full_rescue	NA
chrY-56858001-56859000	-30.2665	group_4	ENSG00000235857	CTBP2P1	Distal Intergenic	full_rescue	NA
chrY-56846001-56847000	-34.9038	group_2	ENSG00000235857	CTBP2P1	Distal Intergenic	full_rescue	NA
chrY-56844001-56845000	-46.8705	group_4	ENSG00000235857	CTBP2P1	Distal Intergenic	full_rescue	NA
chrY-56842001-56843000	-30.9006	group_3	ENSG00000235857	CTBP2P1	Distal Intergenic	full_rescue	NA
chrY-56839001-56840000	-38.78	group_3	ENSG00000235857	CTBP2P1	Distal Intergenic	full_rescue	NA
chrY-56838001-56839000	-31.4763	group_3	ENSG00000235857	CTBP2P1	Distal Intergenic	full_rescue	NA
chrY-56826001-56827000	-29.0878	group_3	ENSG00000235857	CTBP2P1	Distal Intergenic	full_rescue	NA
chrY-56825001-56826000	-42.3147	group_3	ENSG00000235857	CTBP2P1	Distal Intergenic	full_rescue	NA
chrY-11746001-11747000	-54.2373	group_3	ENSG00000234385	RCC2P1	Distal Intergenic	full_rescue	NA
chrY-11308001-11309000	-28.268	group_4	ENSG00000258567	DUX4L16	Exon (ENST00000555130/ENSG00000258567, exon 1 of 1)	full_rescue	CGI_only
chrY-11273001-11274000	-34.5128	group_2	ENSG00000258567	DUX4L16	Distal Intergenic	full_rescue	NA
chrY-11251001-11252000	-38.141	group_3	ENSG00000278212	MAFIP	Distal Intergenic	full_rescue	NA
chrY-11216001-11217000	-66.6667	group_3	ENSG00000278212	MAFIP	Promoter (<=1kb)	partial_rescue	CGI_only
chrY-11215001-11216000	-27.8607	group_3	ENSG00000278212	MAFIP	Promoter (<=1kb)	full_rescue	CGI_only
chrY-11204001-11205000	-26.3191	group_3	ENSG00000278212	MAFIP	Intron (ENST00000652671/ENSG00000278212, intron 2 of 2)	full_rescue	NA
chrY-11201001-11202000	-40.0285	group_2	ENSG00000278212	MAFIP	Intron (ENST00000652671/ENSG00000278212, intron 2 of 2)	full_rescue	NA
chrY-11184001-11185000	-47.0833	group_3	ENSG00000278212	MAFIP	Intron (ENST00000652671/ENSG00000278212, intron 2 of 2)	full_rescue	NA
chrY-11183001-11184000	-48.0997	group_1	ENSG00000278212	MAFIP	Intron (ENST00000652671/ENSG00000278212, intron 2 of 2)	full_rescue	NA
chrY-11167001-11168000	-32.5225	group_4	ENSG00000278212	MAFIP	Intron (ENST00000652671/ENSG00000278212, intron 2 of 2)	full_rescue	CGI_only
chrY-11159001-11160000	-25.0823	group_3	ENSG00000278212	MAFIP	Exon (ENST00000620700/ENSG00000278212, exon 1 of 6)	full_rescue	NA
chrY-11157001-11158000	-28.8815	group_2	ENSG00000278212	MAFIP	Exon (ENST00000620700/ENSG00000278212, exon 2 of 6)	full_rescue	NA
chrY-11153001-11154000	-37.5527	group_2	ENSG00000278212	MAFIP	Exon (ENST00000620700/ENSG00000278212, exon 6 of 6)	full_rescue	NA
chrY-11107001-11108000	-28.4797	group_3	ENSG00000270570	RP1-85D24.1	Promoter (<=1kb)	full_rescue	CGI_only
chrY-11102001-11103000	-25.8924	group_3	ENSG00000271365	RP1-85D24.3	Distal Intergenic	full_rescue	NA
chrY-11099001-11100000	-41.217	group_3	ENSG00000271365	RP1-85D24.3	Distal Intergenic	full_rescue	NA
chrY-11098001-11099000	-34.5666	group_3	ENSG00000271365	RP1-85D24.3	Distal Intergenic	full_rescue	NA
chrY-11096001-11097000	-30.0013	group_3	ENSG00000273693	C2orf27AP1	Distal Intergenic	full_rescue	NA
chrY-11088001-11089000	-35.2379	group_3	ENSG00000273693	C2orf27AP1	Promoter (1-2kb)	full_rescue	NA
chrY-10175001-10176000	-34.6667	group_4	ENSG00000226061	PCMTD1P1	Distal Intergenic	full_rescue	NA
chrY-10092001-10093000	-34	group_4	ENSG00000252289	RNA5SP519	Promoter (<=1kb)	full_rescue	CGI_only
chrX-9953001-9954000	-36.437	group_4	ENSG00000234469	CLDN34	Distal Intergenic	full_rescue	NA
chrX-99200001-99201000	-27.7778	group_4	ENSG00000270308	RP3-377O6.2	Distal Intergenic	partial_rescue	NA
chrX-9912001-9913000	-52.1092	group_3	ENSG00000146950	SHROOM2	5' UTR	full_rescue	GH_only
chrX-9827001-9828000	-30.614	group_4	ENSG00000146950	SHROOM2	Intron (ENST00000380913/ENSG00000146950, intron 1 of 9)	full_rescue	NA
chrX-97641001-97642000	-60.0649	group_4	ENSG00000236256	DIAPH2-AS1	Promoter (<=1kb)	full_rescue	NA
chrX-97305001-97306000	-40	group_4	ENSG00000147202	DIAPH2	Intron (ENST00000355827/ENSG00000147202, intron 23 of 26)	full_rescue	NA
chrX-9672001-9673000	-27.5641	group_4	ENSG00000101849	TBL1X	Intron (ENST00000407597/ENSG00000101849, intron 5 of 17)	full_rescue	NA
chrX-95837001-95838000	-47.0588	group_4	ENSG00000270583	RP11-471G13.5	Distal Intergenic	full_rescue	NA
chrX-9467001-9468000	-43.4211	group_2	ENSG00000101849	TBL1X	Intron (ENST00000407597/ENSG00000101849, intron 1 of 17)	full_rescue	CGI_and_GH
chrX-9438001-9439000	-30.0093	group_4	ENSG00000282300	RP11-126O22.11	Distal Intergenic	full_rescue	NA
chrX-94204001-94205000	-80	group_4	ENSG00000202410	Y_RNA	Distal Intergenic	full_rescue	NA
chrX-92256001-92257000	-25.5482	group_4	ENSG00000102290	PCDH11X	Intron (ENST00000373097/ENSG00000102290, intron 3 of 5)	full_rescue	NA
chrX-91753001-91754000	-41.0499	group_3	ENSG00000102290	PCDH11X	Distal Intergenic	partial_rescue	NA
chrX-91737001-91738000	-55.5556	group_4	ENSG00000102290	PCDH11X	Distal Intergenic	full_rescue	NA
chrX-8914001-8915000	-48	group_4	ENSG00000285896	NA	Intron (ENST00000650341/ENSG00000285896, intron 3 of 3)	full_rescue	NA
chrX-87541001-87542000	-39.2483	group_3	ENSG00000102271	KLHL4	Intron (ENST00000652270/ENSG00000102271, intron 1 of 11)	no_rescue	NA
chrX-87399001-87400000	-42.1053	group_4	ENSG00000230478	RP1-52D1.1	Distal Intergenic	full_rescue	NA
chrX-8733001-8734000	-30.3419	group_2	ENSG00000011201	ANOS1	Promoter (<=1kb)	full_rescue	CGI_and_GH
chrX-85584001-85585000	-72.7273	group_4	ENSG00000124429	POF1B	Distal Intergenic	full_rescue	NA
chrX-8466001-8467000	-29.4118	group_4	ENSG00000205642	VCX3B	3' UTR	full_rescue	NA
chrX-81105001-81106000	-42.8195	group_4	ENSG00000198157	HMGN5	Distal Intergenic	full_rescue	NA
chrX-8018001-8019000	-41.6667	group_4	ENSG00000285679	NA	Exon (ENST00000655333/ENSG00000285679, exon 2 of 2)	full_rescue	NA
chrX-789001-790000	-27.9571	group_3	ENSG00000185960	SHOX	Distal Intergenic	full_rescue	CGI_only
chrX-78294001-78295000	-30.9524	group_4	ENSG00000173198	CYSLTR1	Intron (ENST00000373304/ENSG00000173198, intron 1 of 2)	full_rescue	NA
chrX-77303001-77304000	-38.8889	group_4	ENSG00000234404	SPRYD7P1	Distal Intergenic	full_rescue	NA
chrX-76749001-76750000	-26.087	group_4	ENSG00000280870	MIR325HG	Intron (ENST00000658368/ENSG00000280870, intron 2 of 3)	full_rescue	NA
chrX-75967001-75968000	-30.6041	group_3	ENSG00000232332	RP3-481A17.1	Distal Intergenic	no_rescue	NA
chrX-75018001-75019000	-63.1579	group_4	ENSG00000050030	KIAA2022	Distal Intergenic	full_rescue	NA
chrX-74942001-74943000	-41.6667	group_4	ENSG00000050030	KIAA2022	Distal Intergenic	full_rescue	NA
chrX-73541001-73542000	-32.6945	group_4	ENSG00000269904	MAP2K4P1	Intron (ENST00000602584/ENSG00000269904, intron 1 of 1)	full_rescue	NA
chrX-73448001-73449000	-78.5714	group_1	ENSG00000131264	CDX4	Promoter (<=1kb)	no_rescue	CGI_only
chrX-73447001-73448000	-77.768	group_1	ENSG00000131264	CDX4	Promoter (<=1kb)	no_rescue	CGI_only
chrX-73446001-73447000	-42.7924	group_1	ENSG00000131264	CDX4	Promoter (<=1kb)	partial_rescue	CGI_only
chrX-727001-728000	-50	group_1	ENSG00000185960	SHOX	Distal Intergenic	full_rescue	NA
chrX-72670001-72671000	-28.2609	group_4	ENSG00000067177	PHKA1	Intron (ENST00000373542/ENSG00000067177, intron 6 of 31)	full_rescue	NA
chrX-72316001-72317000	-31.9328	group_1	ENSG00000285547	NA	Intron (ENST00000647613/ENSG00000285547, intron 10 of 11)	full_rescue	NA
chrX-72314001-72315000	-32.0157	group_3	ENSG00000285547	NA	Intron (ENST00000647613/ENSG00000285547, intron 10 of 11)	full_rescue	NA
chrX-72312001-72313000	-36.1413	group_3	ENSG00000285547	NA	Intron (ENST00000647613/ENSG00000285547, intron 10 of 11)	full_rescue	NA
chrX-72225001-72226000	-48.5137	group_3	ENSG00000102309	PIN4	Intron (ENST00000423432/ENSG00000102309, intron 3 of 3)	no_rescue	NA
chrX-72069001-72070000	-45.8703	group_1	ENSG00000204131	NHSL2	5' UTR	no_rescue	NA
chrX-71461001-71462000	-50	group_4	ENSG00000147133	TAF1	Intron (ENST00000373790/ENSG00000147133, intron 37 of 37)	full_rescue	NA
chrX-71183001-71184000	-33.3333	group_4	ENSG00000228427	RP5-1091N2.9	Exon (ENST00000664514/ENSG00000228427, exon 2 of 2)	full_rescue	CGI_and_GH
chrX-71100001-71101000	-43.3593	group_2	ENSG00000184481	FOXO4	Exon (ENST00000374259/ENSG00000184481, exon 2 of 3)	no_rescue	GH_only
chrX-71028001-71029000	-27.8689	group_4	ENSG00000212605	RNU1-56P	Distal Intergenic	full_rescue	NA
chrX-70496001-70497000	-39.0244	group_4	ENSG00000082458	DLG3	Intron (ENST00000374360/ENSG00000082458, intron 13 of 18)	full_rescue	NA
chrX-70083001-70084000	-44	group_4	ENSG00000189401	OTUD6A	Distal Intergenic	full_rescue	NA
chrX-70043001-70044000	-25.0774	group_4	ENSG00000147160	AWAT2	Exon (ENST00000276101/ENSG00000147160, exon 3 of 8)	full_rescue	NA
chrX-69556001-69557000	-41.6176	group_1	ENSG00000228160	RP13-57D9.3	Distal Intergenic	partial_rescue	NA
chrX-69457001-69458000	-35.7143	group_4	ENSG00000231706	CYCSP43	Distal Intergenic	full_rescue	NA
chrX-69320001-69321000	-35.0543	group_4	ENSG00000215162	LINC00269	Distal Intergenic	full_rescue	NA
chrX-69262001-69263000	-48.4472	group_2	ENSG00000215162	LINC00269	Distal Intergenic	full_rescue	NA
chrX-69231001-69232000	-47.7273	group_4	ENSG00000215162	LINC00269	Distal Intergenic	full_rescue	NA
chrX-69107001-69108000	-35.3623	group_2	ENSG00000181191	PJA1	Distal Intergenic	no_rescue	NA
chrX-6906001-6907000	-44.0476	group_4	ENSG00000130021	PUDP	Intron (ENST00000655425/ENSG00000130021, intron 3 of 3)	full_rescue	NA
chrX-69029001-69030000	-37.4359	group_3	ENSG00000181191	PJA1	Distal Intergenic	partial_rescue	NA
chrX-68989001-68990000	-33.0353	group_3	ENSG00000090776	EFNB1	Distal Intergenic	partial_rescue	GH_only
chrX-68736001-68737000	-31.2561	group_3	ENSG00000232267	ACTR3P2	Distal Intergenic	full_rescue	NA
chrX-684001-685000	-56.7604	group_3	ENSG00000185960	SHOX	Distal Intergenic	partial_rescue	NA
chrX-68330001-68331000	-60	group_3	ENSG00000079482	OPHN1	Intron (ENST00000680612/ENSG00000079482, intron 2 of 19)	full_rescue	NA
chrX-68217001-68218000	-31.4815	group_4	ENSG00000079482	OPHN1	Intron (ENST00000680612/ENSG00000079482, intron 6 of 19)	full_rescue	NA
chrX-676001-677000	-26.0612	group_3	ENSG00000185960	SHOX	Distal Intergenic	partial_rescue	NA
chrX-6711001-6712000	-34	group_3	ENSG00000130021	PUDP	Intron (ENST00000438499/ENSG00000130021, intron 1 of 2)	no_rescue	NA
chrX-66930001-66931000	-37.931	group_4	ENSG00000222667	RNU6-394P	Distal Intergenic	full_rescue	NA
chrX-66718001-66719000	-42.711	group_4	ENSG00000222667	RNU6-394P	Distal Intergenic	full_rescue	NA
chrX-6669001-6670000	-40.5838	group_2	ENSG00000130021	PUDP	Intron (ENST00000438499/ENSG00000130021, intron 2 of 2)	no_rescue	NA
chrX-666001-667000	-31.5312	group_3	ENSG00000185960	SHOX	Distal Intergenic	full_rescue	CGI_only
chrX-65620001-65621000	-29.3301	group_2	ENSG00000147065	MSN	Intron (ENST00000609672/ENSG00000147065, intron 1 of 3)	full_rescue	NA
chrX-65364001-65365000	-34.8039	group_3	ENSG00000102053	ZC3H12B	Promoter (1-2kb)	partial_rescue	NA
chrX-643001-644000	-63.5193	group_2	ENSG00000185960	SHOX	Intron (ENST00000381578/ENSG00000185960, intron 5 of 5)	partial_rescue	CGI_only
chrX-642001-643000	-31.8995	group_1	ENSG00000185960	SHOX	Intron (ENST00000381578/ENSG00000185960, intron 5 of 5)	full_rescue	CGI_only
chrX-6394001-6395000	-28.6822	group_4	ENSG00000265284	MIR4770	Distal Intergenic	full_rescue	NA
chrX-63791001-63792000	-33.6601	group_4	ENSG00000131089	ARHGEF9	Intron (ENST00000623417/ENSG00000131089, intron 2 of 4)	full_rescue	NA
chrX-63031001-63032000	-32.4406	group_4	ENSG00000277499	RP11-144M17.1	Distal Intergenic	full_rescue	NA
chrX-6284001-6285000	-38.9953	group_4	ENSG00000146938	NLGN4X	Distal Intergenic	full_rescue	NA
chrX-625001-626000	-25.918	group_1	ENSG00000185960	SHOX	Promoter (<=1kb)	full_rescue	CGI_only
chrX-6085001-6086000	-36.0075	group_4	ENSG00000146938	NLGN4X	Intron (ENST00000381093/ENSG00000146938, intron 2 of 5)	full_rescue	NA
chrX-58292001-58293000	-38.5117	group_3	ENSG00000235124	KRT8P17	Distal Intergenic	full_rescue	NA
chrX-58291001-58292000	-25.5781	group_3	ENSG00000235124	KRT8P17	Distal Intergenic	full_rescue	NA
chrX-58289001-58290000	-25.159	group_3	ENSG00000235124	KRT8P17	Distal Intergenic	full_rescue	NA
chrX-58288001-58289000	-29.9196	group_3	ENSG00000235124	KRT8P17	Distal Intergenic	full_rescue	NA
chrX-58287001-58288000	-27.6982	group_3	ENSG00000235124	KRT8P17	Distal Intergenic	full_rescue	NA
chrX-58286001-58287000	-28.3436	group_4	ENSG00000235124	KRT8P17	Distal Intergenic	full_rescue	NA
chrX-58280001-58281000	-29.4048	group_4	ENSG00000235124	KRT8P17	Distal Intergenic	full_rescue	NA
chrX-58277001-58278000	-48.4563	group_4	ENSG00000235124	KRT8P17	Distal Intergenic	full_rescue	NA
chrX-58267001-58268000	-39.6452	group_4	ENSG00000235124	KRT8P17	Distal Intergenic	full_rescue	NA
chrX-58264001-58265000	-25.1564	group_4	ENSG00000235124	KRT8P17	Distal Intergenic	full_rescue	NA
chrX-58262001-58263000	-25.2995	group_3	ENSG00000235124	KRT8P17	Distal Intergenic	full_rescue	NA
chrX-58258001-58259000	-32.8125	group_4	ENSG00000235124	KRT8P17	Distal Intergenic	full_rescue	NA
chrX-58205001-58206000	-57.3314	group_3	ENSG00000235124	KRT8P17	Distal Intergenic	full_rescue	NA
chrX-58191001-58192000	-80	group_4	ENSG00000235124	KRT8P17	Distal Intergenic	full_rescue	NA
chrX-58144001-58145000	-71.4286	group_2	ENSG00000235124	KRT8P17	Distal Intergenic	full_rescue	NA
chrX-58142001-58143000	-45.4304	group_3	ENSG00000235124	KRT8P17	Distal Intergenic	full_rescue	NA
chrX-58141001-58142000	-71.6643	group_4	ENSG00000235124	KRT8P17	Distal Intergenic	full_rescue	NA
chrX-58126001-58127000	-60	group_3	ENSG00000235124	KRT8P17	Distal Intergenic	partial_rescue	NA
chrX-58083001-58084000	-44.6314	group_3	ENSG00000235124	KRT8P17	Distal Intergenic	full_rescue	NA
chrX-58080001-58081000	-47.7733	group_4	ENSG00000235124	KRT8P17	Distal Intergenic	full_rescue	NA
chrX-57909001-57910000	-26.176	group_4	ENSG00000198205	ZXDA	Promoter (<=1kb)	full_rescue	CGI_only
chrX-56797001-56798000	-33.942	group_3	ENSG00000204272	LINC01420	Intron (ENST00000637096/ENSG00000204272, intron 2 of 3)	partial_rescue	NA
chrX-56759001-56760000	-48.7778	group_4	ENSG00000204272	LINC01420	Intron (ENST00000637096/ENSG00000204272, intron 2 of 3)	full_rescue	NA
chrX-56587001-56588000	-33.8154	group_3	ENSG00000188021	UBQLN2	Distal Intergenic	no_rescue	NA
chrX-56183001-56184000	-33.5859	group_4	ENSG00000227486	RP13-188A5.1	Intron (ENST00000669152/ENSG00000227486, intron 2 of 2)	full_rescue	NA
chrX-560001-561000	-84.6154	group_3	ENSG00000229232	KRT18P53	Distal Intergenic	full_rescue	NA
chrX-55789001-55790000	-31.6979	group_4	ENSG00000083750	RRAGB	Distal Intergenic	full_rescue	NA
chrX-55688001-55689000	-70.3704	group_4	ENSG00000083750	RRAGB	Distal Intergenic	full_rescue	NA
chrX-54431001-54432000	-45.8333	group_4	ENSG00000158526	TSR2	Distal Intergenic	full_rescue	NA
chrX-54415001-54416000	-30.2885	group_2	ENSG00000158526	TSR2	Distal Intergenic	full_rescue	NA
chrX-54180001-54181000	-38.8889	group_4	ENSG00000184083	FAM120C	Intron (ENST00000375180/ENSG00000184083, intron 1 of 15)	full_rescue	CGI_and_GH
chrX-53356001-53357000	-43.0275	group_4	ENSG00000234413	RP6-29D12.2	Distal Intergenic	full_rescue	NA
chrX-53256001-53257000	-40.5351	group_2	ENSG00000124313	IQSEC2	Exon (ENST00000640694/ENSG00000124313, exon 3 of 14)	no_rescue	CGI_only
chrX-53048001-53049000	-32	group_1	ENSG00000184194	GPR173	Promoter (<=1kb)	full_rescue	GH_only
chrX-53000001-53001000	-49.0001	group_4	ENSG00000268350	FAM156A	Distal Intergenic	full_rescue	CGI_only
chrX-52634001-52635000	-26.717	group_4	ENSG00000157965	SSX8	Distal Intergenic	full_rescue	NA
chrX-52620001-52621000	-33.1691	group_4	ENSG00000157965	SSX8	Promoter (1-2kb)	full_rescue	NA
chrX-52435001-52436000	-40	group_4	ENSG00000224556	RP11-485B17.3	Intron (ENST00000456973/ENSG00000224556, intron 1 of 1)	partial_rescue	NA
chrX-51262001-51263000	-36.9879	group_2	ENSG00000229151	RP11-348F1.3	Intron (ENST00000425150/ENSG00000229151, intron 6 of 8)	full_rescue	NA
chrX-50994001-50995000	-26.9841	group_4	ENSG00000227493	RP11-104D21.1	Distal Intergenic	full_rescue	NA
chrX-500001-501000	-34.3942	group_1	ENSG00000234958	FABP5P13	Distal Intergenic	no_rescue	CGI_only
chrX-49797001-49798000	-40	group_4	ENSG00000101951	PAGE4	Distal Intergenic	full_rescue	NA
chrX-497001-498000	-55.3686	group_2	ENSG00000234958	FABP5P13	Distal Intergenic	partial_rescue	CGI_only
chrX-49627001-49628000	-67.8707	group_4	ENSG00000213856	VDAC1P2	Distal Intergenic	full_rescue	NA
chrX-49209001-49210000	-52.1739	group_2	ENSG00000102001	CACNA1F	3' UTR	no_rescue	NA
chrX-49072001-49073000	-73.3205	group_3	ENSG00000243279	PRAF2	3' UTR	full_rescue	CGI_only
chrX-48956001-48957000	-26.3975	group_1	ENSG00000068308	OTUD5	Exon (ENST00000376488/ENSG00000068308, exon 1 of 9)	full_rescue	CGI_and_GH
chrX-48910001-48911000	-33.3172	group_2	ENSG00000102100	SLC35A2	Promoter (<=1kb)	full_rescue	CGI_and_GH
chrX-48821001-48822000	-31.0345	group_4	ENSG00000094631	HDAC6	Intron (ENST00000376619/ENSG00000094631, intron 23 of 28)	full_rescue	NA
chrX-4881001-4882000	-39.4444	group_4	ENSG00000236513	RP11-707P20.1	Distal Intergenic	full_rescue	NA
chrX-48568001-48569000	-42.8571	group_4	ENSG00000204620	RP11-1148L6.9	Exon (ENST00000376775/ENSG00000204620, exon 2 of 2)	full_rescue	NA
chrX-482001-483000	-41.6324	group_3	ENSG00000234958	FABP5P13	Distal Intergenic	full_rescue	NA
chrX-48142001-48143000	-27.9654	group_3	ENSG00000230241	RP11-38O23.3	Distal Intergenic	full_rescue	NA
chrX-48081001-48082000	-42.4242	group_4	ENSG00000221994	ZNF630	Distal Intergenic	full_rescue	NA
chrX-47806001-47807000	-58.3529	group_2	ENSG00000188459	WASF4P	Distal Intergenic	partial_rescue	GH_only
chrX-47768001-47769000	-81.8182	group_4	ENSG00000229968	RP3-393P12.1	Distal Intergenic	full_rescue	NA
chrX-47619001-47620000	-28.4211	group_4	ENSG00000008056	SYN1	Promoter (<=1kb)	full_rescue	CGI_only
chrX-47340001-47341000	-26.1905	group_4	ENSG00000147117	ZNF157	Distal Intergenic	full_rescue	NA
chrX-46750001-46751000	-39.1304	group_4	ENSG00000065923	SLC9A7	Intron (ENST00000616978/ENSG00000065923, intron 1 of 16)	full_rescue	NA
chrX-455001-456000	-31.1347	group_3	ENSG00000280767	RP13-465B17.5	Distal Intergenic	full_rescue	NA
chrX-4448001-4449000	-38.7097	group_4	ENSG00000236513	RP11-707P20.1	Distal Intergenic	full_rescue	NA
chrX-44344001-44345000	-45.0102	group_2	ENSG00000183690	EFHC2	Promoter (<=1kb)	partial_rescue	CGI_and_GH
chrX-43975001-43976000	-31.5012	group_4	ENSG00000124479	NDP	Promoter (1-2kb)	full_rescue	GH_only
chrX-42779001-42780000	-32.4324	group_4	ENSG00000102055	PPP1R2P9	Promoter (<=1kb)	full_rescue	CGI_only
chrX-41378001-41379000	-40.7407	group_4	ENSG00000264573	RN7SL15P	Distal Intergenic	full_rescue	GH_only
chrX-41264001-41265000	-29.5908	group_4	ENSG00000223714	RP5-1172N10.2	Distal Intergenic	partial_rescue	NA
chrX-4105001-4106000	-47	group_3	ENSG00000225722	RP11-706O15.8	Distal Intergenic	full_rescue	NA
chrX-40539001-40540000	-27.199	group_2	ENSG00000238730	RNU7-164P	Distal Intergenic	full_rescue	NA
chrX-40507001-40508000	-30.7692	group_4	ENSG00000235685	RP11-126D17.1	Distal Intergenic	full_rescue	NA
chrX-40298001-40299000	-57.3529	group_2	ENSG00000236393	RP11-320G24.1	Exon (ENST00000653973/ENSG00000236393, exon 2 of 2)	partial_rescue	NA
chrX-40205001-40206000	-33.2836	group_4	ENSG00000183337	BCOR	Distal Intergenic	full_rescue	CGI_only
chrX-40142001-40143000	-28.5714	group_4	ENSG00000183337	BCOR	Intron (ENST00000378455/ENSG00000183337, intron 1 of 13)	partial_rescue	NA
chrX-40087001-40088000	-46.9298	group_2	ENSG00000183337	BCOR	Intron (ENST00000397354/ENSG00000183337, intron 1 of 14)	full_rescue	NA
chrX-40011001-40012000	-45.2557	group_1	ENSG00000223486	AC092198.1	Exon (ENST00000447651/ENSG00000223486, exon 2 of 2)	no_rescue	CGI_and_GH
chrX-39961001-39962000	-31.2546	group_4	ENSG00000223486	AC092198.1	Distal Intergenic	full_rescue	NA
chrX-39642001-39643000	-34.0363	group_3	ENSG00000263730	MIR3937	Distal Intergenic	full_rescue	NA
chrX-39577001-39578000	-36.3636	group_4	ENSG00000263730	MIR3937	Distal Intergenic	full_rescue	NA
chrX-39535001-39536000	-28.6738	group_4	ENSG00000234191	RP11-157D23.2	Distal Intergenic	full_rescue	NA
chrX-39475001-39476000	-29.7297	group_4	ENSG00000234191	RP11-157D23.2	Distal Intergenic	full_rescue	NA
chrX-39445001-39446000	-35.1976	group_4	ENSG00000234191	RP11-157D23.2	Distal Intergenic	full_rescue	NA
chrX-39162001-39163000	-50.9826	group_1	ENSG00000207122	RNU6-591P	Distal Intergenic	no_rescue	CGI_only
chrX-38870001-38871000	-63.9676	group_2	ENSG00000238123	MID1IP1-AS1	Distal Intergenic	full_rescue	NA
chrX-38701001-38702000	-63.0435	group_3	ENSG00000235806	RP4-646N3.1	Distal Intergenic	no_rescue	NA
chrX-37686001-37687000	-45.4106	group_1	ENSG00000047597	XK	Promoter (<=1kb)	full_rescue	CGI_and_GH
chrX-37505001-37506000	-38.7931	group_4	ENSG00000234355	FTH1P27	Promoter (<=1kb)	full_rescue	CGI_only
chrX-36905001-36906000	-34.7826	group_3	ENSG00000286475	NA	Distal Intergenic	partial_rescue	NA
chrX-3689001-3690000	-52.4178	group_2	ENSG00000183943	PRKX	Intron (ENST00000262848/ENSG00000183943, intron 1 of 8)	no_rescue	NA
chrX-35501001-35502000	-52.1739	group_4	ENSG00000252411	RNU6-1087P	Distal Intergenic	full_rescue	NA
chrX-35151001-35152000	-30.2747	group_4	ENSG00000229347	RP11-504E21.1	Distal Intergenic	full_rescue	NA
chrX-3344001-3345000	-59.5616	group_2	ENSG00000101825	MXRA5	Intron (ENST00000217939/ENSG00000101825, intron 1 of 6)	partial_rescue	CGI_and_GH
chrX-33434001-33435000	-34.4031	group_1	ENSG00000215310	RP6-60B16.1	Distal Intergenic	full_rescue	NA
chrX-332001-333000	-51.8593	group_3	ENSG00000226179	LINC00685	Downstream (<1kb)	partial_rescue	CGI_only
chrX-331001-332000	-70.0114	group_1	ENSG00000226179	LINC00685	Downstream (1-2kb)	no_rescue	CGI_only
chrX-33041001-33042000	-43.3333	group_4	ENSG00000226781	TBCAP1	Promoter (<=1kb)	full_rescue	NA
chrX-3180001-3181000	-28.5714	group_4	ENSG00000230249	RP13-824C8.2	Distal Intergenic	partial_rescue	NA
chrX-31218001-31219000	-32.3956	group_4	ENSG00000198947	DMD	Intron (ENST00000680162/ENSG00000198947, intron 2 of 15)	full_rescue	NA
chrX-3076001-3077000	-31.7128	group_1	ENSG00000062096	ARSF	Exon (ENST00000381127/ENSG00000062096, exon 4 of 11)	partial_rescue	NA
chrX-30232001-30233000	-30.6952	group_4	ENSG00000198798	MAGEB3	5' UTR	full_rescue	NA
chrX-30000001-30001000	-28.0728	group_4	ENSG00000227592	PIGFP3	Distal Intergenic	full_rescue	NA
chrX-29987001-29988000	-91.6667	group_3	ENSG00000227592	PIGFP3	Distal Intergenic	full_rescue	NA
chrX-2927001-2928000	-74.1259	group_4	ENSG00000006756	ARSD	Intron (ENST00000381154/ENSG00000006756, intron 1 of 9)	full_rescue	CGI_only
chrX-28977001-28978000	-25.6472	group_4	ENSG00000169306	IL1RAPL1	Intron (ENST00000378993/ENSG00000169306, intron 2 of 10)	full_rescue	NA
chrX-2793001-2794000	-35.429	group_2	ENSG00000124343	XG	Intron (ENST00000644266/ENSG00000124343, intron 5 of 10)	no_rescue	NA
chrX-2710001-2711000	-28.5041	group_4	ENSG00000002586	CD99	Intron (ENST00000611428/ENSG00000002586, intron 1 of 10)	full_rescue	GH_only
chrX-270001-271000	-34.7848	group_2	ENSG00000182378	PLCXD1	Distal Intergenic	full_rescue	CGI_only
chrX-269001-270000	-36.5915	group_4	ENSG00000182378	PLCXD1	Distal Intergenic	full_rescue	CGI_only
chrX-2686001-2687000	-35.7355	group_4	ENSG00000002586	CD99	Distal Intergenic	full_rescue	NA
chrX-26453001-26454000	-50	group_4	ENSG00000231388	RP11-702C7.2	Distal Intergenic	full_rescue	NA
chrX-260001-261000	-25.8522	group_2	ENSG00000228572	LL0YNC03-29C1.1	Distal Intergenic	full_rescue	CGI_only
chrX-2593001-2594000	-44.0909	group_1	ENSG00000277120	MIR6089	Distal Intergenic	partial_rescue	NA
chrX-2585001-2586000	-37.11	group_3	ENSG00000277120	MIR6089	Distal Intergenic	full_rescue	CGI_only
chrX-2498001-2499000	-29.1537	group_3	ENSG00000169084	DHRSX	Intron (ENST00000334651/ENSG00000169084, intron 1 of 6)	full_rescue	CGI_only
chrX-24364001-24365000	-30.0442	group_3	ENSG00000223731	SUPT20HL1	Exon (ENST00000436466/ENSG00000223731, exon 2 of 2)	full_rescue	CGI_only
chrX-23841001-23842000	-36	group_4	ENSG00000184831	APOO	Intron (ENST00000633432/ENSG00000184831, intron 2 of 3)	full_rescue	GH_only
chrX-2374001-2375000	-27.6596	group_4	ENSG00000169084	DHRSX	Intron (ENST00000334651/ENSG00000169084, intron 3 of 6)	full_rescue	NA
chrX-2371001-2372000	-68.1148	group_3	ENSG00000169084	DHRSX	Intron (ENST00000334651/ENSG00000169084, intron 3 of 6)	full_rescue	NA
chrX-2370001-2371000	-40.195	group_4	ENSG00000169084	DHRSX	Intron (ENST00000334651/ENSG00000169084, intron 3 of 6)	full_rescue	NA
chrX-23700001-23701000	-27.662	group_4	ENSG00000123131	PRDX4	Downstream (<1kb)	full_rescue	NA
chrX-23699001-23700000	-65.5556	group_3	ENSG00000123131	PRDX4	Downstream (1-2kb)	full_rescue	NA
chrX-23607001-23608000	-58.7302	group_3	ENSG00000123131	PRDX4	Distal Intergenic	full_rescue	NA
chrX-21656001-21657000	-71.2121	group_3	ENSG00000185915	KLHL34	Exon (ENST00000379499/ENSG00000185915, exon 1 of 1)	partial_rescue	CGI_only
chrX-19895001-19896000	-29.3956	group_4	ENSG00000147010	SH3KBP1	Distal Intergenic	full_rescue	NA
chrX-19814001-19815000	-27.6338	group_3	ENSG00000147010	SH3KBP1	Intron (ENST00000397821/ENSG00000147010, intron 2 of 17)	full_rescue	NA
chrX-19669001-19670000	-45.9165	group_2	ENSG00000147010	SH3KBP1	Intron (ENST00000397821/ENSG00000147010, intron 6 of 17)	partial_rescue	GH_only
chrX-19475001-19476000	-31.085	group_4	ENSG00000180815	MAP3K15	Intron (ENST00000518578/ENSG00000180815, intron 1 of 29)	full_rescue	NA
chrX-19417001-19418000	-31.3433	group_4	ENSG00000180815	MAP3K15	Intron (ENST00000518578/ENSG00000180815, intron 8 of 29)	partial_rescue	NA
chrX-19379001-19380000	-34.4828	group_4	ENSG00000180815	MAP3K15	Intron (ENST00000518578/ENSG00000180815, intron 20 of 29)	full_rescue	NA
chrX-19246001-19247000	-35.2843	group_4	ENSG00000131828	PDHA1	Distal Intergenic	full_rescue	NA
chrX-19115001-19116000	-41.6525	group_4	ENSG00000173698	ADGRG2	Intron (ENST00000379869/ENSG00000173698, intron 1 of 28)	full_rescue	NA
chrX-18665001-18666000	-41.5722	group_4	ENSG00000102104	RS1	Intron (ENST00000379984/ENSG00000102104, intron 1 of 5)	full_rescue	NA
chrX-17859001-17860000	-47.0443	group_1	ENSG00000131831	RAI2	Intron (ENST00000415486/ENSG00000131831, intron 1 of 2)	no_rescue	CGI_only
chrX-17819001-17820000	-57.1429	group_4	ENSG00000131831	RAI2	Intron (ENST00000415486/ENSG00000131831, intron 1 of 2)	full_rescue	NA
chrX-17636001-17637000	-29.7222	group_4	ENSG00000188158	NHS	Intron (ENST00000676302/ENSG00000188158, intron 1 of 8)	full_rescue	NA
chrX-17635001-17636000	-34.3156	group_3	ENSG00000188158	NHS	5' UTR	full_rescue	NA
chrX-17530001-17531000	-37.2894	group_3	ENSG00000188158	NHS	Intron (ENST00000676302/ENSG00000188158, intron 1 of 8)	full_rescue	GH_only
chrX-17472001-17473000	-53.5714	group_4	ENSG00000188158	NHS	Intron (ENST00000676302/ENSG00000188158, intron 1 of 8)	full_rescue	NA
chrX-17146001-17147000	-32.3529	group_4	ENSG00000169891	REPS2	Intron (ENST00000357277/ENSG00000169891, intron 17 of 17)	full_rescue	NA
chrX-16679001-16680000	-31.9149	group_4	ENSG00000047230	CTPS2	Intron (ENST00000359276/ENSG00000047230, intron 9 of 18)	full_rescue	NA
chrX-16653001-16654000	-33.931	group_4	ENSG00000047230	CTPS2	Intron (ENST00000380200/ENSG00000169906, intron 2 of 2)	full_rescue	NA
chrX-16529001-16530000	-36.3636	group_4	ENSG00000239333	RN7SL658P	Distal Intergenic	full_rescue	NA
chrX-1649001-1650000	-61.4286	group_3	ENSG00000196433	ASMT	Distal Intergenic	full_rescue	NA
chrX-15870001-15871000	-50	group_4	ENSG00000182287	AP1S2	Distal Intergenic	full_rescue	NA
chrX-15775001-15776000	-30.4407	group_3	ENSG00000169239	CA5B	Exon (ENST00000318636/ENSG00000169239, exon 6 of 8)	partial_rescue	NA
chrX-1576001-1577000	-51.1905	group_3	ENSG00000197976	AKAP17A	Distal Intergenic	full_rescue	NA
chrX-156020001-156021000	-35.7641	group_4	ENSG00000182484	WASH6P	Promoter (<=1kb)	full_rescue	NA
chrX-156016001-156017000	-75.4181	group_2	ENSG00000185203	WASIR1	Promoter (<=1kb)	no_rescue	CGI_only
chrX-156003001-156004000	-29.7622	group_4	ENSG00000124334	IL9R	Exon (ENST00000244174/ENSG00000124334, exon 2 of 9)	full_rescue	NA
chrX-155974001-155975000	-35.8426	group_3	ENSG00000228410	TCEB1P24	Distal Intergenic	full_rescue	NA
chrX-155949001-155950000	-25.8419	group_4	ENSG00000228410	TCEB1P24	Distal Intergenic	full_rescue	NA
chrX-155946001-155947000	-31.9149	group_4	ENSG00000228410	TCEB1P24	Distal Intergenic	full_rescue	NA
chrX-155925001-155926000	-47.9814	group_4	ENSG00000124333	VAMP7	Intron (ENST00000286448/ENSG00000124333, intron 6 of 7)	full_rescue	NA
chrX-155917001-155918000	-26.4626	group_4	ENSG00000124333	VAMP7	Intron (ENST00000286448/ENSG00000124333, intron 5 of 7)	full_rescue	NA
chrX-155880001-155881000	-25.6008	group_4	ENSG00000124333	VAMP7	Promoter (<=1kb)	full_rescue	CGI_only
chrX-155874001-155875000	-56.1345	group_2	ENSG00000237040	DPH3P2	Promoter (<=1kb)	no_rescue	NA
chrX-155869001-155870000	-43.0968	group_4	ENSG00000237040	DPH3P2	Distal Intergenic	full_rescue	NA
chrX-155775001-155776000	-46.5024	group_3	ENSG00000168939	SPRY3	3' UTR	full_rescue	NA
chrX-155773001-155774000	-39.3443	group_4	ENSG00000168939	SPRY3	5' UTR	full_rescue	NA
chrX-155728001-155729000	-25.2523	group_3	ENSG00000168939	SPRY3	Intron (ENST00000676089/ENSG00000168939, intron 1 of 1)	full_rescue	NA
chrX-155149001-155150000	-35.2707	group_3	ENSG00000235991	RP11-143H17.1	Intron (ENST00000502880/ENSG00000235991, intron 7 of 7)	full_rescue	NA
chrX-15497001-15498000	-30.6122	group_1	ENSG00000102010	BMX	Intron (ENST00000357607/ENSG00000102010, intron 1 of 18)	full_rescue	GH_only
chrX-154417001-154418000	-69.4444	group_4	ENSG00000102125	TAZ	Intron (ENST00000613634/ENSG00000102125, intron 4 of 5)	full_rescue	NA
chrX-154211001-154212000	-35.7895	group_3	ENSG00000274962	TEX28P1	Intron (ENST00000613479/ENSG00000274962, intron 1 of 2)	full_rescue	NA
chrX-153953001-153954000	-29.822	group_1	ENSG00000172534	HCFC1	Exon (ENST00000444191/ENSG00000172534, exon 2 of 10)	full_rescue	CGI_only
chrX-153944001-153945000	-75	group_3	ENSG00000102032	RENBP	Promoter (<=1kb)	full_rescue	NA
chrX-153909001-153910000	-31.3462	group_3	ENSG00000284987	NA	Promoter (<=1kb)	full_rescue	NA
chrX-153904001-153905000	-29.1026	group_3	ENSG00000126895	AVPR2	5' UTR	full_rescue	GH_only
chrX-153885001-153886000	-25.6158	group_1	ENSG00000198910	L1CAM	Promoter (<=1kb)	no_rescue	CGI_and_GH
chrX-153878001-153879000	-29.9638	group_2	ENSG00000198910	L1CAM	Intron (ENST00000370060/ENSG00000198910, intron 1 of 28)	full_rescue	NA
chrX-153821001-153822000	-50.8073	group_2	ENSG00000067840	PDZD4	Intron (ENST00000164640/ENSG00000067840, intron 1 of 7)	no_rescue	CGI_and_GH
chrX-153781001-153782000	-29.2853	group_4	ENSG00000184343	SRPK3	5' UTR	full_rescue	CGI_and_GH
chrX-153768001-153769000	-27.5362	group_4	ENSG00000198753	PLXNB3	Exon (ENST00000538966/ENSG00000198753, exon 5 of 37)	full_rescue	CGI_and_GH
chrX-153686001-153687000	-40.2558	group_2	ENSG00000130822	PNCK	5' UTR	full_rescue	CGI_and_GH
chrX-153674001-153675000	-25.1849	group_3	ENSG00000130822	PNCK	5' UTR	full_rescue	CGI_only
chrX-153648001-153649000	-26.9323	group_1	ENSG00000130829	DUSP9	Exon (ENST00000477033/ENSG00000130829, exon 3 of 3)	full_rescue	CGI_and_GH
chrX-153645001-153646000	-88.2353	group_3	ENSG00000130829	DUSP9	Intron (ENST00000477033/ENSG00000130829, intron 1 of 2)	full_rescue	CGI_and_GH
chrX-153641001-153642000	-30.337	group_1	ENSG00000130829	DUSP9	Promoter (<=1kb)	full_rescue	CGI_and_GH
chrX-153636001-153637000	-35.7143	group_3	ENSG00000130829	DUSP9	Distal Intergenic	full_rescue	NA
chrX-153578001-153579000	-27.799	group_3	ENSG00000067842	ATP2B3	Intron (ENST00000349466/ENSG00000067842, intron 20 of 20)	full_rescue	NA
chrX-153550001-153551000	-43.75	group_4	ENSG00000067842	ATP2B3	Exon (ENST00000349466/ENSG00000067842, exon 11 of 21)	full_rescue	NA
chrX-153522001-153523000	-29.5833	group_3	ENSG00000067842	ATP2B3	Intron (ENST00000349466/ENSG00000067842, intron 1 of 20)	full_rescue	NA
chrX-153517001-153518000	-63.4013	group_2	ENSG00000067842	ATP2B3	Promoter (<=1kb)	full_rescue	CGI_only
chrX-153495001-153496000	-31.7119	group_1	ENSG00000213397	HAUS7	Promoter (<=1kb)	no_rescue	GH_only
chrX-153492001-153493000	-26.3478	group_3	ENSG00000213397	HAUS7	Intron (ENST00000370210/ENSG00000213397, intron 1 of 5)	partial_rescue	GH_only
chrX-153411001-153412000	-68.7408	group_2	ENSG00000189420	ZFP92	Distal Intergenic	no_rescue	CGI_only
chrX-153410001-153411000	-46.3636	group_3	ENSG00000265170	RN7SL667P	Distal Intergenic	full_rescue	CGI_only
chrX-153394001-153395000	-28.037	group_4	ENSG00000214897	U82695.5	Downstream (<1kb)	full_rescue	NA
chrX-153306001-153307000	-44.4444	group_4	ENSG00000225110	LL0XNC01-16G2.1	Distal Intergenic	full_rescue	NA
chrX-153266001-153267000	-26.5923	group_4	ENSG00000278803	RP11-635O16.1	Distal Intergenic	full_rescue	NA
chrX-152989001-152990000	-31.5106	group_3	ENSG00000198883	PNMA5	3' UTR	full_rescue	GH_only
chrX-152007001-152008000	-58.3333	group_4	ENSG00000102287	GABRE	Distal Intergenic	full_rescue	NA
chrX-151961001-151962000	-30.9091	group_4	ENSG00000102287	GABRE	Exon (ENST00000370328/ENSG00000102287, exon 5 of 9)	partial_rescue	NA
chrX-151371001-151372000	-28.4604	group_3	ENSG00000287918	NA	Intron (ENST00000668689/ENSG00000287918, intron 1 of 1)	full_rescue	NA
chrX-150966001-150967000	-35.3236	group_3	ENSG00000222796	RNU6-383P	Distal Intergenic	partial_rescue	NA
chrX-150960001-150961000	-35.2941	group_4	ENSG00000222796	RNU6-383P	Distal Intergenic	full_rescue	NA
chrX-150904001-150905000	-43.006	group_3	ENSG00000102181	CD99L2	Distal Intergenic	partial_rescue	NA
chrX-150421001-150422000	-31.4042	group_2	ENSG00000013619	MAMLD1	5' UTR	full_rescue	NA
chrX-150339001-150340000	-28.7259	group_4	ENSG00000013619	MAMLD1	Distal Intergenic	full_rescue	NA
chrX-150293001-150294000	-39.0409	group_3	ENSG00000234825	XRCC6P2	Distal Intergenic	full_rescue	NA
chrX-150228001-150229000	-39.4444	group_4	ENSG00000252454	MIR2114	Promoter (<=1kb)	full_rescue	NA
chrX-150162001-150163000	-25.2235	group_4	ENSG00000235703	LINC00894	Intron (ENST00000449111/ENSG00000235703, intron 11 of 14)	full_rescue	NA
chrX-149980001-149981000	-47.619	group_4	ENSG00000235703	LINC00894	Intron (ENST00000670799/ENSG00000235703, intron 11 of 13)	partial_rescue	NA
chrX-149652001-149653000	-27.457	group_4	ENSG00000229322	RP5-937E21.1	Promoter (1-2kb)	partial_rescue	NA
chrX-149477001-149478000	-47.0588	group_4	ENSG00000010404	IDS	3' UTR	full_rescue	NA
chrX-1494001-1495000	-43.4176	group_2	ENSG00000182162	P2RY8	5' UTR	full_rescue	GH_only
chrX-149348001-149349000	-70	group_4	ENSG00000287585	NA	Distal Intergenic	full_rescue	NA
chrX-1484001-1485000	-32.246	group_4	ENSG00000182162	P2RY8	Intron (ENST00000381297/ENSG00000182162, intron 1 of 1)	full_rescue	GH_only
chrX-1482001-1483000	-36.5385	group_1	ENSG00000182162	P2RY8	Intron (ENST00000381297/ENSG00000182162, intron 1 of 1)	full_rescue	GH_only
chrX-147675001-147676000	-40.4605	group_3	ENSG00000228855	RP3-433G13.1	Distal Intergenic	full_rescue	NA
chrX-1467001-1468000	-51.6541	group_2	ENSG00000182162	P2RY8	Intron (ENST00000381297/ENSG00000182162, intron 1 of 1)	no_rescue	CGI_only
chrX-146619001-146620000	-76.9231	group_3	ENSG00000231686	RP1-203P18.1	Promoter (<=1kb)	full_rescue	CGI_only
chrX-1466001-1467000	-72.8632	group_1	ENSG00000182162	P2RY8	5' UTR	no_rescue	CGI_only
chrX-1465001-1466000	-89.3403	group_2	ENSG00000182162	P2RY8	3' UTR	no_rescue	CGI_only
chrX-143377001-143378000	-44.2004	group_4	ENSG00000227303	GS1-256O22.5	Intron (ENST00000431432/ENSG00000227303, intron 2 of 5)	full_rescue	NA
chrX-14244001-14245000	-34.4262	group_1	ENSG00000233247	GS1-257G1.1	Promoter (<=1kb)	full_rescue	NA
chrX-140655001-140656000	-26.6667	group_4	ENSG00000230668	XXyac-YR29IB3.1	Distal Intergenic	partial_rescue	NA
chrX-14033001-14034000	-44.8276	group_4	ENSG00000046647	GEMIN8	Distal Intergenic	full_rescue	GH_only
chrX-137548001-137549000	-36.1676	group_1	ENSG00000224765	RP1-137H15.2	Distal Intergenic	no_rescue	CGI_only
chrX-137545001-137546000	-72.2093	group_1	ENSG00000224765	RP1-137H15.2	Distal Intergenic	no_rescue	CGI_only
chrX-136871001-136872000	-52.381	group_4	ENSG00000147274	RBMX	Intron (ENST00000561733/ENSG00000147274, intron 2 of 2)	full_rescue	NA
chrX-136163001-136164000	-36.1854	group_3	ENSG00000022267	FHL1	Intron (ENST00000629039/ENSG00000022267, intron 1 of 6)	partial_rescue	GH_only
chrX-136077001-136078000	-31.5903	group_4	ENSG00000219930	GAPDHP67	Promoter (<=1kb)	full_rescue	NA
chrX-134945001-134946000	-61.1612	group_3	ENSG00000236091	RP3-473B4.3	Distal Intergenic	partial_rescue	NA
chrX-133726001-133727000	-25.1701	group_3	ENSG00000147257	GPC3	Intron (ENST00000370818/ENSG00000147257, intron 3 of 7)	full_rescue	NA
chrX-1331001-1332000	-27.2369	group_4	ENSG00000185291	IL3RA	Distal Intergenic	full_rescue	NA
chrX-133010001-133011000	-46.6667	group_4	ENSG00000171004	HS6ST2	Distal Intergenic	full_rescue	NA
chrX-132889001-132890000	-30.2277	group_4	ENSG00000171004	HS6ST2	Intron (ENST00000370836/ENSG00000171004, intron 3 of 3)	full_rescue	NA
chrX-130504001-130505000	-63.6364	group_2	ENSG00000274775	RP1-274L7.4	Intron (ENST00000654625/ENSG00000287160, intron 1 of 2)	no_rescue	NA
chrX-130500001-130501000	-33.3333	group_4	ENSG00000274775	RP1-274L7.4	Intron (ENST00000654625/ENSG00000287160, intron 1 of 2)	full_rescue	NA
chrX-130280001-130281000	-31.5199	group_3	ENSG00000056277	ZNF280C	Distal Intergenic	full_rescue	NA
chrX-130085001-130086000	-29.4131	group_4	ENSG00000102034	ELF4	Intron (ENST00000308167/ENSG00000102034, intron 1 of 8)	full_rescue	GH_only
chrX-130065001-130066000	-37.3799	group_3	ENSG00000102034	ELF4	3' UTR	partial_rescue	NA
chrX-130055001-130056000	-43.9531	group_2	ENSG00000085185	BCORL1	Exon (ENST00000218147/ENSG00000085185, exon 13 of 13)	full_rescue	NA
chrX-130025001-130026000	-30.5032	group_3	ENSG00000085185	BCORL1	Exon (ENST00000218147/ENSG00000085185, exon 7 of 13)	partial_rescue	GH_only
chrX-129929001-129930000	-45.2381	group_4	ENSG00000156697	UTP14A	3' UTR	full_rescue	CGI_only
chrX-129754001-129755000	-35.0859	group_1	ENSG00000122121	XPNPEP2	Exon (ENST00000371106/ENSG00000122121, exon 12 of 21)	no_rescue	GH_only
chrX-129695001-129696000	-55.2632	group_3	ENSG00000287024	NA	Distal Intergenic	full_rescue	NA
chrX-129678001-129679000	-63.7917	group_2	ENSG00000287024	NA	Promoter (<=1kb)	partial_rescue	CGI_only
chrX-128927001-128928000	-31.3725	group_4	ENSG00000225689	RP1-30E17.2	Intron (ENST00000660383/ENSG00000225689, intron 5 of 10)	full_rescue	NA
chrX-125981001-125982000	-45.0538	group_3	ENSG00000280223	RP1-138O17.1	Distal Intergenic	no_rescue	NA
chrX-125627001-125628000	-82.2222	group_3	ENSG00000213489	RP13-147D17.1	Distal Intergenic	full_rescue	NA
chrX-125614001-125615000	-46.0705	group_2	ENSG00000213489	RP13-147D17.1	Distal Intergenic	full_rescue	NA
chrX-124109001-124110000	-32.2581	group_4	ENSG00000101972	STAG2	Intron (ENST00000469481/ENSG00000101972, intron 2 of 3)	full_rescue	NA
chrX-123825001-123826000	-61.1111	group_4	ENSG00000264933	RN7SL190P	Distal Intergenic	full_rescue	NA
chrX-123185001-123186000	-32.3681	group_1	ENSG00000125675	GRIA3	Promoter (<=1kb)	no_rescue	CGI_only
chrX-121048001-121049000	-25.9873	group_2	ENSG00000182890	GLUD2	Promoter (<=1kb)	no_rescue	CGI_only
chrX-120250001-120251000	-25.8929	group_1	ENSG00000177485	ZBTB33	Promoter (<=1kb)	full_rescue	CGI_only
chrX-119763001-119764000	-43.2954	group_2	ENSG00000187808	SOWAHD	Distal Intergenic	no_rescue	GH_only
chrX-119695001-119696000	-47.3348	group_2	ENSG00000279601	CTA-38K21.2	Exon (ENST00000625181/ENSG00000279601, exon 1 of 1)	no_rescue	CGI_and_GH
chrX-119449001-119450000	-50.6734	group_4	ENSG00000077713	SLC25A43	Intron (ENST00000217909/ENSG00000077713, intron 3 of 4)	full_rescue	NA
chrX-119390001-119391000	-29.6296	group_1	ENSG00000226661	RP5-1139I1.2	Intron (ENST00000413240/ENSG00000226661, intron 1 of 2)	partial_rescue	NA
chrX-119048001-119049000	-66.1538	group_3	ENSG00000277535	RP13-347D8.7	Distal Intergenic	full_rescue	NA
chrX-118828001-118829000	-32.6745	group_2	ENSG00000174460	ZCCHC12	Distal Intergenic	full_rescue	NA
chrX-118826001-118827000	-44.7761	group_1	ENSG00000174460	ZCCHC12	3' UTR	full_rescue	GH_only
chrX-118613001-118614000	-95.2381	group_3	ENSG00000147251	DOCK11	Intron (ENST00000276202/ENSG00000147251, intron 28 of 52)	full_rescue	NA
chrX-118458001-118459000	-56.3218	group_4	ENSG00000147251	DOCK11	Distal Intergenic	full_rescue	NA
chrX-117325001-117326000	-100	group_1	ENSG00000238066	RP3-378P9.1	Distal Intergenic	no_rescue	NA
chrX-116970001-116971000	-32.6615	group_4	ENSG00000213526	SETP8	Distal Intergenic	full_rescue	NA
chrX-11685001-11686000	-47.0588	group_4	ENSG00000282840	GS1-590J6.3	Intron (ENST00000634846/ENSG00000282840, intron 3 of 3)	full_rescue	NA
chrX-116334001-116335000	-26.5189	group_4	ENSG00000207033	RNU6-154P	Distal Intergenic	full_rescue	NA
chrX-11426001-11427000	-75	group_3	ENSG00000047648	ARHGAP6	Intron (ENST00000380736/ENSG00000047648, intron 1 of 12)	full_rescue	CGI_and_GH
chrX-114183001-114184000	-31.6667	group_4	ENSG00000241743	XACT	Distal Intergenic	full_rescue	NA
chrX-114104001-114105000	-68	group_4	ENSG00000241743	XACT	Distal Intergenic	full_rescue	NA
chrX-113955001-113956000	-46.1538	group_4	ENSG00000241743	XACT	Exon (ENST00000674361/ENSG00000241743, exon 2 of 2)	full_rescue	NA
chrX-113554001-113555000	-32.3529	group_4	ENSG00000220541	RP5-1170D6.1	Distal Intergenic	full_rescue	NA
chrX-1124001-1125000	-28.8372	group_3	ENSG00000205755	CRLF2	Distal Intergenic	full_rescue	NA
chrX-112099001-112100000	-25.5985	group_4	ENSG00000072315	TRPC5	Distal Intergenic	full_rescue	NA
chrX-110955001-110956000	-44.1176	group_4	ENSG00000077264	PAK3	Intron (ENST00000425146/ENSG00000077264, intron 1 of 14)	partial_rescue	NA
chrX-1107001-1108000	-30.3393	group_2	ENSG00000225661	RPL14P5	Distal Intergenic	partial_rescue	NA
chrX-1106001-1107000	-36.3439	group_2	ENSG00000225661	RPL14P5	Distal Intergenic	partial_rescue	NA
chrX-1105001-1106000	-36.6732	group_1	ENSG00000225661	RPL14P5	Distal Intergenic	partial_rescue	NA
chrX-110096001-110097000	-39.1429	group_4	ENSG00000157600	TMEM164	Intron (ENST00000372072/ENSG00000157600, intron 2 of 5)	full_rescue	NA
chrX-109890001-109891000	-25.1587	group_4	ENSG00000225381	RPS5P7	Distal Intergenic	full_rescue	NA
chrX-109600001-109601000	-65.051	group_2	ENSG00000176076	KCNE5	Distal Intergenic	no_rescue	NA
chrX-108946001-108947000	-45.4545	group_4	ENSG00000275110	MIR6087	Distal Intergenic	full_rescue	NA
chrX-108944001-108945000	-85.7143	group_4	ENSG00000275110	MIR6087	Distal Intergenic	full_rescue	NA
chrX-107936001-107937000	-64.6988	group_1	ENSG00000236064	RP6-191P20.4	Promoter (<=1kb)	no_rescue	CGI_only
chrX-107860001-107861000	-32.8125	group_4	ENSG00000080561	MID2	Intron (ENST00000262843/ENSG00000080561, intron 3 of 9)	full_rescue	NA
chrX-107485001-107486000	-52.807	group_4	ENSG00000147234	FRMPD3	Distal Intergenic	full_rescue	NA
chrX-107429001-107430000	-33.3836	group_4	ENSG00000214720	KRT18P49	Promoter (<=1kb)	full_rescue	NA
chrX-107364001-107365000	-40.594	group_2	ENSG00000215007	DNAJA1P3	Distal Intergenic	partial_rescue	NA
chrX-107341001-107342000	-29.7619	group_4	ENSG00000215007	DNAJA1P3	Distal Intergenic	partial_rescue	NA
chrX-107323001-107324000	-46.6667	group_4	ENSG00000215007	DNAJA1P3	Distal Intergenic	full_rescue	CGI_only
chrX-106892001-106893000	-46.6667	group_4	ENSG00000133131	MORC4	Intron (ENST00000604604/ENSG00000133131, intron 1 of 1)	full_rescue	GH_only
chrX-104568001-104569000	-82.3529	group_1	ENSG00000189108	IL1RAPL2	Intron (ENST00000372582/ENSG00000189108, intron 1 of 10)	no_rescue	CGI_only
chrX-104565001-104566000	-76.0591	group_1	ENSG00000189108	IL1RAPL2	Promoter (<=1kb)	no_rescue	CGI_only
chrX-104267001-104268000	-44.5659	group_2	ENSG00000123576	ESX1	Distal Intergenic	full_rescue	NA
chrX-104213001-104214000	-62.0635	group_4	ENSG00000123576	ESX1	Distal Intergenic	full_rescue	NA
chrX-104188001-104189000	-45.4545	group_4	ENSG00000123575	FAM199X	Exon (ENST00000493442/ENSG00000123575, exon 5 of 6)	partial_rescue	NA
chrX-1041001-1042000	-28.6599	group_4	ENSG00000225661	RPL14P5	Distal Intergenic	full_rescue	NA
chrX-102547001-102548000	-94.3957	group_3	ENSG00000176318	FOXN3P1	Promoter (<=1kb)	full_rescue	NA
chrX-102240001-102241000	-29.5438	group_4	ENSG00000269405	NXF2	Distal Intergenic	full_rescue	NA
chrX-102142001-102143000	-79.0476	group_2	ENSG00000204071	TCEAL6	Promoter (<=1kb)	no_rescue	CGI_only
chrX-10142001-10143000	-29.0323	group_4	ENSG00000047644	WWC3	3' UTR	full_rescue	NA
chrX-10132001-10133000	-25.8709	group_3	ENSG00000047644	WWC3	Intron (ENST00000380861/ENSG00000047644, intron 18 of 22)	partial_rescue	NA
chrX-101183001-101184000	-50	group_4	ENSG00000231643	GHc-210E9.2	Distal Intergenic	full_rescue	NA
chrX-101090001-101091000	-32.0755	group_4	ENSG00000126950	TMEM35A	Intron (ENST00000372930/ENSG00000126950, intron 1 of 1)	full_rescue	NA
chrX-100550001-100551000	-53.1947	group_4	ENSG00000000005	TNMD	Distal Intergenic	full_rescue	NA
chrX-100407001-100408000	-63.5537	group_3	ENSG00000165194	PCDH19	Exon (ENST00000420881/ENSG00000165194, exon 1 of 5)	full_rescue	CGI_only
chrX-100406001-100407000	-53.5809	group_4	ENSG00000165194	PCDH19	Exon (ENST00000420881/ENSG00000165194, exon 1 of 5)	full_rescue	CGI_only
chrX-100048001-100049000	-30.8039	group_2	ENSG00000252296	SNORA25	Distal Intergenic	full_rescue	NA
chr9-99471001-99472000	-42.8571	group_4	ENSG00000237461	RP11-554F20.1	Intron (ENST00000652827/ENSG00000237461, intron 2 of 5)	full_rescue	NA
chr9-99368001-99369000	-55.4992	group_3	ENSG00000277465	AL137067.1	Promoter (<=1kb)	full_rescue	GH_only
chr9-99281001-99282000	-55.8824	group_3	ENSG00000222337	RN7SKP225	Distal Intergenic	partial_rescue	NA
chr9-99259001-99260000	-75.0812	group_3	ENSG00000222337	RN7SKP225	Distal Intergenic	partial_rescue	NA
chr9-98919001-98920000	-32.4324	group_4	ENSG00000204291	COL15A1	Distal Intergenic	full_rescue	GH_only
chr9-98776001-98777000	-28.6431	group_3	ENSG00000165138	ANKS6	Intron (ENST00000444472/ENSG00000165138, intron 1 of 8)	full_rescue	GH_only
chr9-982001-983000	-48.1618	group_3	ENSG00000064218	DMRT3	Intron (ENST00000190165/ENSG00000064218, intron 1 of 1)	full_rescue	NA
chr9-98118001-98119000	-33.0252	group_1	ENSG00000106785	TRIM14	Promoter (<=1kb)	full_rescue	CGI_and_GH
chr9-98035001-98036000	-42.1053	group_4	ENSG00000212521	RNU6-918P	Distal Intergenic	full_rescue	GH_only
chr9-97832001-97833000	-32.7273	group_2	ENSG00000236130	PTCSC2	Intron (ENST00000649461/ENSG00000236130, intron 1 of 10)	partial_rescue	NA
chr9-97831001-97832000	-25.5208	group_1	ENSG00000236130	PTCSC2	Intron (ENST00000649461/ENSG00000236130, intron 1 of 10)	full_rescue	NA
chr9-978001-979000	-28.5955	group_1	ENSG00000064218	DMRT3	Intron (ENST00000190165/ENSG00000064218, intron 1 of 1)	full_rescue	CGI_only
chr9-97738001-97739000	-27.7778	group_4	ENSG00000236130	PTCSC2	Intron (ENST00000649461/ENSG00000236130, intron 5 of 10)	full_rescue	GH_only
chr9-97724001-97725000	-27.6442	group_4	ENSG00000236130	PTCSC2	Exon (ENST00000649461/ENSG00000236130, exon 6 of 11)	full_rescue	NA
chr9-97445001-97446000	-55.3333	group_2	ENSG00000196116	TDRD7	Intron (ENST00000355295/ENSG00000196116, intron 6 of 16)	no_rescue	NA
chr9-97387001-97388000	-28.42	group_1	ENSG00000228957	RP11-23J9.3	Exon (ENST00000430691/ENSG00000228957, exon 9 of 11)	partial_rescue	NA
chr9-97307001-97308000	-75.9407	group_1	ENSG00000197816	CCDC180	Promoter (<=1kb)	no_rescue	CGI_and_GH
chr9-97078001-97079000	-33.9371	group_4	ENSG00000228376	GAS2L1P2	Intron (ENST00000681517/ENSG00000136943, intron 2 of 9)	full_rescue	CGI_only
chr9-97077001-97078000	-55.4723	group_3	ENSG00000228376	GAS2L1P2	Exon (ENST00000442849/ENSG00000228376, exon 3 of 3)	full_rescue	CGI_only
chr9-97076001-97077000	-64.9294	group_2	ENSG00000228376	GAS2L1P2	Exon (ENST00000442849/ENSG00000228376, exon 3 of 3)	no_rescue	CGI_only
chr9-96786001-96787000	-45.5556	group_3	ENSG00000081386	ZNF510	Distal Intergenic	partial_rescue	NA
chr9-96720001-96721000	-59.3659	group_3	ENSG00000224848	RP11-535M15.1	Exon (ENST00000661289/ENSG00000224848, exon 2 of 3)	partial_rescue	CGI_only
chr9-96719001-96720000	-51.4803	group_3	ENSG00000224848	RP11-535M15.1	Intron (ENST00000661289/ENSG00000224848, intron 1 of 2)	no_rescue	CGI_only
chr9-96462001-96463000	-26.1766	group_3	ENSG00000130956	HABP4	Intron (ENST00000375249/ENSG00000130956, intron 2 of 7)	full_rescue	NA
chr9-96324001-96325000	-28.1602	group_4	ENSG00000130958	SLC35D2	3' UTR	full_rescue	NA
chr9-96303001-96304000	-26.1509	group_4	ENSG00000285269	NA	Intron (ENST00000464104/ENSG00000285269, intron 2 of 15)	full_rescue	NA
chr9-96219001-96220000	-40.6677	group_2	ENSG00000232283	RP11-240L7.4	Distal Intergenic	no_rescue	CGI_and_GH
chr9-96169001-96170000	-29.082	group_2	ENSG00000224546	EIF4BP3	Distal Intergenic	partial_rescue	NA
chr9-96100001-96101000	-33.0719	group_4	ENSG00000182150	ERCC6L2	Exon (ENST00000432783/ENSG00000237212, exon 4 of 6)	full_rescue	NA
chr9-96041001-96042000	-25.6667	group_4	ENSG00000182150	ERCC6L2	Intron (ENST00000670016/ENSG00000182150, intron 20 of 20)	full_rescue	GH_only
chr9-96028001-96029000	-43.1685	group_3	ENSG00000182150	ERCC6L2	Intron (ENST00000670016/ENSG00000182150, intron 19 of 20)	partial_rescue	CGI_and_GH
chr9-96027001-96028000	-51.2298	group_1	ENSG00000225194	LINC00092	Promoter (<=1kb)	full_rescue	CGI_and_GH
chr9-96024001-96025000	-25.7668	group_4	ENSG00000182150	ERCC6L2	Exon (ENST00000580908/ENSG00000225194, exon 2 of 2)	full_rescue	CGI_and_GH
chr9-96001001-96002000	-26.0078	group_4	ENSG00000182150	ERCC6L2	Intron (ENST00000402838/ENSG00000182150, intron 16 of 16)	full_rescue	NA
chr9-95874001-95875000	-46.9003	group_3	ENSG00000175611	LINC00476	Exon (ENST00000433656/ENSG00000175611, exon 1 of 4)	full_rescue	CGI_and_GH
chr9-95770001-95771000	-31.8199	group_3	ENSG00000175611	LINC00476	Intron (ENST00000433656/ENSG00000175611, intron 2 of 3)	full_rescue	GH_only
chr9-95740001-95741000	-66.3043	group_3	ENSG00000268926	RP11-180I4.4	Distal Intergenic	full_rescue	NA
chr9-95560001-95561000	-29.5632	group_4	ENSG00000185920	PTCH1	Distal Intergenic	full_rescue	NA
chr9-95394001-95395000	-25.1962	group_3	ENSG00000158169	FANCC	Intron (ENST00000636777/ENSG00000158169, intron 1 of 6)	partial_rescue	NA
chr9-95313001-95314000	-33.0348	group_1	ENSG00000158169	FANCC	Intron (ENST00000289081/ENSG00000158169, intron 1 of 14)	full_rescue	CGI_and_GH
chr9-95174001-95175000	-28.2086	group_4	ENSG00000158169	FANCC	Intron (ENST00000289081/ENSG00000158169, intron 4 of 14)	full_rescue	NA
chr9-94807001-94808000	-31.25	group_4	ENSG00000148120	C9orf3	Intron (ENST00000375315/ENSG00000148120, intron 5 of 16)	full_rescue	NA
chr9-94673001-94674000	-50.9434	group_4	ENSG00000165140	FBP1	Distal Intergenic	full_rescue	GH_only
chr9-94656001-94657000	-34.0699	group_2	ENSG00000165140	FBP1	Distal Intergenic	full_rescue	GH_only
chr9-93965001-93966000	-33.9662	group_3	ENSG00000235601	BARX1-AS1	Distal Intergenic	full_rescue	NA
chr9-93957001-93958000	-46.7919	group_2	ENSG00000235601	BARX1-AS1	Exon (ENST00000454594/ENSG00000235601, exon 2 of 3)	partial_rescue	CGI_and_GH
chr9-93947001-93948000	-38.2261	group_1	ENSG00000131668	BARX1	Distal Intergenic	full_rescue	CGI_and_GH
chr9-93909001-93910000	-49.931	group_3	ENSG00000131668	BARX1	Distal Intergenic	full_rescue	NA
chr9-93861001-93862000	-27.5168	group_3	ENSG00000265347	MIR4291	Distal Intergenic	partial_rescue	CGI_only
chr9-93860001-93861000	-38.5494	group_3	ENSG00000265347	MIR4291	Distal Intergenic	partial_rescue	CGI_only
chr9-93183001-93184000	-34.8065	group_1	ENSG00000165238	WNK2	Promoter (<=1kb)	no_rescue	CGI_and_GH
chr9-93175001-93176000	-34.8684	group_4	ENSG00000165238	WNK2	Distal Intergenic	full_rescue	NA
chr9-93053001-93054000	-36.4819	group_2	ENSG00000157303	SUSD3	Distal Intergenic	full_rescue	GH_only
chr9-93038001-93039000	-25.2273	group_4	ENSG00000157303	SUSD3	Distal Intergenic	full_rescue	NA
chr9-92970001-92971000	-29.6033	group_3	ENSG00000127084	FGD3	Intron (ENST00000375482/ENSG00000127084, intron 1 of 17)	partial_rescue	GH_only
chr9-92947001-92948000	-33.6744	group_1	ENSG00000127084	FGD3	Promoter (<=1kb)	no_rescue	GH_only
chr9-92946001-92947000	-31.0192	group_3	ENSG00000127084	FGD3	Promoter (<=1kb)	partial_rescue	GH_only
chr9-92808001-92809000	-30.2444	group_1	ENSG00000288062	NA	Promoter (<=1kb)	full_rescue	CGI_only
chr9-92807001-92808000	-74.4025	group_1	ENSG00000288062	NA	Exon (ENST00000655112/ENSG00000288062, exon 2 of 2)	no_rescue	CGI_only
chr9-92791001-92792000	-43.4176	group_2	ENSG00000288062	NA	Distal Intergenic	full_rescue	NA
chr9-92775001-92776000	-26.9001	group_4	ENSG00000185963	BICD2	Distal Intergenic	full_rescue	NA
chr9-92716001-92717000	-46.053	group_2	ENSG00000185963	BICD2	Intron (ENST00000375512/ENSG00000185963, intron 6 of 7)	full_rescue	CGI_only
chr9-92703001-92704000	-26.2403	group_4	ENSG00000213669	RP11-476B13.2	Distal Intergenic	full_rescue	NA
chr9-92286001-92287000	-36.5079	group_4	ENSG00000196305	IARS	3' UTR	full_rescue	NA
chr9-92189001-92190000	-26.9239	group_4	ENSG00000276717	RP11-62C3.10	Exon (ENST00000611097/ENSG00000276717, exon 1 of 5)	full_rescue	NA
chr9-92147001-92148000	-30.1223	group_1	ENSG00000225511	LINC00475	Exon (ENST00000367276/ENSG00000225511, exon 2 of 2)	full_rescue	GH_only
chr9-92134001-92135000	-35.3935	group_1	ENSG00000234537	RP11-100G15.7	Exon (ENST00000412768/ENSG00000234537, exon 4 of 16)	partial_rescue	GH_only
chr9-92122001-92123000	-31.4286	group_4	ENSG00000090054	SPTLC1	Distal Intergenic	partial_rescue	NA
chr9-91977001-91978000	-37.3333	group_4	ENSG00000169071	ROR2	Distal Intergenic	full_rescue	GH_only
chr9-91758001-91759000	-31.2821	group_3	ENSG00000169071	ROR2	Intron (ENST00000375715/ENSG00000169071, intron 2 of 12)	full_rescue	NA
chr9-91697001-91698000	-28.2609	group_4	ENSG00000169071	ROR2	Intron (ENST00000375715/ENSG00000169071, intron 11 of 12)	full_rescue	NA
chr9-91425001-91426000	-26.3587	group_1	ENSG00000233081	RP11-440G5.2	Promoter (<=1kb)	full_rescue	CGI_and_GH
chr9-91194001-91195000	-41.9697	group_2	ENSG00000230537	RP11-305L7.1	Intron (ENST00000667274/ENSG00000230537, intron 1 of 2)	partial_rescue	CGI_and_GH
chr9-91160001-91161000	-35.8085	group_2	ENSG00000229694	LINC00484	Exon (ENST00000608240/ENSG00000235641, exon 1 of 2)	full_rescue	CGI_and_GH
chr9-91159001-91160000	-47.7004	group_2	ENSG00000235641	LINC00484	Promoter (<=1kb)	no_rescue	CGI_and_GH
chr9-91118001-91119000	-45.5927	group_1	ENSG00000229694	LINC00484	Promoter (<=1kb)	partial_rescue	CGI_and_GH
chr9-91108001-91109000	-50	group_4	ENSG00000230537	RP11-305L7.1	Intron (ENST00000666264/ENSG00000237422, intron 1 of 2)	full_rescue	NA
chr9-91072001-91073000	-39.2857	group_4	ENSG00000229694	LINC00484	Distal Intergenic	full_rescue	NA
chr9-90949001-90950000	-35.1351	group_4	ENSG00000228216	RP11-367F23.1	Distal Intergenic	partial_rescue	NA
chr9-90915001-90916000	-27.2245	group_2	ENSG00000287212	NA	Distal Intergenic	full_rescue	NA
chr9-90805001-90806000	-53.75	group_3	ENSG00000165025	SYK	Intron (ENST00000375751/ENSG00000165025, intron 1 of 12)	full_rescue	GH_only
chr9-90420001-90421000	-25.7143	group_3	ENSG00000231107	LINC01508	Intron (ENST00000659218/ENSG00000231107, intron 1 of 2)	no_rescue	NA
chr9-90396001-90397000	-32.3854	group_2	ENSG00000231107	LINC01508	Intron (ENST00000659218/ENSG00000231107, intron 1 of 2)	no_rescue	NA
chr9-903001-904000	-38.2646	group_3	ENSG00000137090	DMRT1	Intron (ENST00000382276/ENSG00000137090, intron 3 of 4)	no_rescue	GH_only
chr9-90141001-90142000	-25.9918	group_3	ENSG00000279503	RP11-30P16.1	Distal Intergenic	full_rescue	NA
chr9-89939001-89940000	-26.3158	group_4	ENSG00000237626	RP11-406A20.1	Intron (ENST00000656288/ENSG00000237626, intron 2 of 6)	full_rescue	NA
chr9-89924001-89925000	-35.9344	group_3	ENSG00000237626	RP11-406A20.1	Intron (ENST00000656288/ENSG00000237626, intron 2 of 6)	full_rescue	NA
chr9-89919001-89920000	-42.7729	group_2	ENSG00000237626	RP11-406A20.1	Intron (ENST00000656288/ENSG00000237626, intron 2 of 6)	no_rescue	NA
chr9-89821001-89822000	-66.6667	group_3	ENSG00000226206	RP5-1050E16.2	Exon (ENST00000421297/ENSG00000226206, exon 3 of 3)	full_rescue	NA
chr9-89596001-89597000	-28.6792	group_3	ENSG00000285907	NA	Intron (ENST00000648620/ENSG00000285907, intron 3 of 6)	partial_rescue	NA
chr9-89594001-89595000	-35.1673	group_2	ENSG00000285907	NA	Intron (ENST00000648620/ENSG00000285907, intron 3 of 6)	no_rescue	NA
chr9-89171001-89172000	-60.8696	group_3	ENSG00000148082	SHC3	Intron (ENST00000375835/ENSG00000148082, intron 1 of 11)	full_rescue	NA
chr9-88990001-88991000	-25.7168	group_1	ENSG00000213694	S1PR3	Promoter (<=1kb)	full_rescue	CGI_and_GH
chr9-88956001-88957000	-45.2614	group_2	ENSG00000225856	PCNPP2	Distal Intergenic	full_rescue	NA
chr9-88700001-88701000	-39.2857	group_3	ENSG00000265873	MIR4289	Distal Intergenic	full_rescue	NA
chr9-88546001-88547000	-35.4839	group_4	ENSG00000130045	NXNL2	Intron (ENST00000375855/ENSG00000130045, intron 1 of 2)	full_rescue	NA
chr9-88502001-88503000	-27.47	group_3	ENSG00000231804	RP11-317B17.3	Distal Intergenic	full_rescue	NA
chr9-88361001-88362000	-26.3793	group_4	ENSG00000106723	SPIN1	Distal Intergenic	full_rescue	NA
chr9-88225001-88226000	-33.1111	group_3	ENSG00000229288	RP11-1E11.2	Distal Intergenic	full_rescue	NA
chr9-88006001-88007000	-28.0665	group_4	ENSG00000271923	RNU6-86P	Distal Intergenic	full_rescue	CGI_only
chr9-8787001-8788000	-49.2823	group_4	ENSG00000153707	PTPRD	Intron (ENST00000381196/ENSG00000153707, intron 8 of 42)	full_rescue	NA
chr9-87798001-87799000	-71.6667	group_4	ENSG00000232743	XXyac-YM21GA2.1	Downstream (<1kb)	full_rescue	NA
chr9-87720001-87721000	-33.1034	group_4	ENSG00000135047	CTSL	Distal Intergenic	full_rescue	GH_only
chr9-87466001-87467000	-34.9962	group_4	ENSG00000286842	NA	Distal Intergenic	full_rescue	GH_only
chr9-87456001-87457000	-30.303	group_4	ENSG00000286842	NA	Distal Intergenic	full_rescue	NA
chr9-87421001-87422000	-42.1538	group_4	ENSG00000228373	RP11-497K15.1	Promoter (1-2kb)	full_rescue	NA
chr9-87224001-87225000	-31.1878	group_4	ENSG00000212421	SNORA26	Distal Intergenic	full_rescue	NA
chr9-87148001-87149000	-36.3316	group_1	ENSG00000204446	C9orf170	Promoter (<=1kb)	partial_rescue	CGI_and_GH
chr9-8704001-8705000	-49.7624	group_3	ENSG00000153707	PTPRD	Intron (ENST00000381196/ENSG00000153707, intron 9 of 42)	full_rescue	NA
chr9-86807001-86808000	-31.5534	group_1	ENSG00000288575	NA	Distal Intergenic	full_rescue	NA
chr9-8676001-8677000	-26.6846	group_4	ENSG00000153707	PTPRD	Intron (ENST00000381196/ENSG00000153707, intron 9 of 42)	full_rescue	NA
chr9-8664001-8665000	-50	group_4	ENSG00000153707	PTPRD	Intron (ENST00000381196/ENSG00000153707, intron 9 of 42)	full_rescue	NA
chr9-86375001-86376000	-45.7223	group_3	ENSG00000214908	RP11-229M1.2	Promoter (<=1kb)	full_rescue	NA
chr9-86297001-86298000	-45.9459	group_4	ENSG00000083223	ZCCHC6	Intron (ENST00000277141/ENSG00000083223, intron 27 of 27)	full_rescue	NA
chr9-86127001-86128000	-40.0992	group_1	ENSG00000287333	NA	Promoter (<=1kb)	full_rescue	GH_only
chr9-85916001-85917000	-66.6667	group_4	ENSG00000213711	PHBP7	Distal Intergenic	full_rescue	NA
chr9-85302001-85303000	-31.9805	group_3	ENSG00000287930	NA	Distal Intergenic	full_rescue	NA
chr9-84840001-84841000	-26.3778	group_3	ENSG00000148053	NTRK2	Intron (ENST00000376208/ENSG00000148053, intron 14 of 15)	full_rescue	NA
chr9-84102001-84103000	-45.5052	group_1	ENSG00000270166	RP11-158D2.1	Distal Intergenic	no_rescue	NA
chr9-8357001-8358000	-60	group_4	ENSG00000153707	PTPRD	Intron (ENST00000381196/ENSG00000153707, intron 36 of 42)	full_rescue	NA
chr9-83568001-83569000	-40	group_3	ENSG00000199483	RNU4-15P	Distal Intergenic	partial_rescue	NA
chr9-82421001-82422000	-41.6084	group_4	ENSG00000228430	RP11-15B24.5	Intron (ENST00000637606/ENSG00000228430, intron 5 of 9)	full_rescue	NA
chr9-8241001-8242000	-32.2581	group_4	ENSG00000231902	RP11-29B9.2	Distal Intergenic	full_rescue	NA
chr9-81211001-81212000	-26.6667	group_4	ENSG00000228375	RPS20P25	Distal Intergenic	full_rescue	NA
chr9-79257001-79258000	-30.3667	group_3	ENSG00000260995	RP11-165H23.1	Distal Intergenic	full_rescue	GH_only
chr9-78704001-78705000	-30.2534	group_4	ENSG00000237257	MTND2P8	Distal Intergenic	full_rescue	NA
chr9-78033001-78034000	-29.6296	group_3	ENSG00000156052	GNAQ	Promoter (1-2kb)	full_rescue	CGI_and_GH
chr9-78021001-78022000	-27.683	group_4	ENSG00000156052	GNAQ	Intron (ENST00000286548/ENSG00000156052, intron 1 of 6)	full_rescue	GH_only
chr9-77984001-77985000	-83.3333	group_4	ENSG00000156052	GNAQ	Intron (ENST00000286548/ENSG00000156052, intron 1 of 6)	full_rescue	GH_only
chr9-76933001-76934000	-38.8571	group_4	ENSG00000230335	DNAJB5P1	Promoter (<=1kb)	full_rescue	NA
chr9-76571001-76572000	-54.9451	group_2	ENSG00000187210	GCNT1	Intron (ENST00000648797/ENSG00000187210, intron 7 of 12)	no_rescue	NA
chr9-76441001-76442000	-41.2698	group_4	ENSG00000187210	GCNT1	5' UTR	full_rescue	NA
chr9-76375001-76376000	-33.3333	group_4	ENSG00000135002	RFK	Distal Intergenic	full_rescue	GH_only
chr9-76298001-76299000	-28.2811	group_4	ENSG00000099139	PCSK5	Intron (ENST00000545128/ENSG00000099139, intron 27 of 36)	full_rescue	GH_only
chr9-76297001-76298000	-59.5872	group_3	ENSG00000099139	PCSK5	Intron (ENST00000545128/ENSG00000099139, intron 27 of 36)	full_rescue	GH_only
chr9-7626001-7627000	-36.2069	group_1	ENSG00000178654	PPIAP33	Distal Intergenic	no_rescue	NA
chr9-75800001-75801000	-26.087	group_4	ENSG00000234644	OTX2P1	Distal Intergenic	full_rescue	NA
chr9-75772001-75773000	-42.1053	group_4	ENSG00000234644	OTX2P1	Distal Intergenic	full_rescue	NA
chr9-75242001-75243000	-32.5758	group_4	ENSG00000212316	RNU6-1228P	Distal Intergenic	full_rescue	GH_only
chr9-74877001-74878000	-37.1023	group_2	ENSG00000119121	TRPM6	Intron (ENST00000361255/ENSG00000119121, intron 1 of 38)	no_rescue	NA
chr9-74846001-74847000	-72.7273	group_4	ENSG00000119121	TRPM6	Intron (ENST00000361255/ENSG00000119121, intron 3 of 38)	full_rescue	NA
chr9-74789001-74790000	-53.3333	group_4	ENSG00000119121	TRPM6	Intron (ENST00000361255/ENSG00000119121, intron 19 of 38)	full_rescue	NA
chr9-7334001-7335000	-37.5763	group_4	ENSG00000288042	NA	Intron (ENST00000654575/ENSG00000288042, intron 2 of 2)	full_rescue	NA
chr9-7219001-7220000	-31.5789	group_4	ENSG00000285688	NA	Distal Intergenic	partial_rescue	NA
chr9-7216001-7217000	-46.4744	group_3	ENSG00000285688	NA	Distal Intergenic	no_rescue	NA
chr9-72148001-72149000	-40.4567	group_3	ENSG00000119125	GDA	Intron (ENST00000545168/ENSG00000119125, intron 1 of 13)	partial_rescue	CGI_and_GH
chr9-71586001-71587000	-33.3333	group_4	ENSG00000229814	RPL35AP21	Distal Intergenic	full_rescue	NA
chr9-7158001-7159000	-27.7778	group_4	ENSG00000107077	KDM4C	Intron (ENST00000381306/ENSG00000107077, intron 19 of 20)	full_rescue	NA
chr9-7151001-7152000	-61.7647	group_4	ENSG00000107077	KDM4C	Intron (ENST00000381306/ENSG00000107077, intron 19 of 20)	full_rescue	NA
chr9-71250001-71251000	-33.5235	group_1	ENSG00000083067	TRPM3	Intron (ENST00000357533/ENSG00000083067, intron 1 of 24)	partial_rescue	NA
chr9-71232001-71233000	-28.9042	group_3	ENSG00000083067	TRPM3	Intron (ENST00000357533/ENSG00000083067, intron 1 of 24)	no_rescue	NA
chr9-71223001-71224000	-32.2581	group_4	ENSG00000083067	TRPM3	Intron (ENST00000357533/ENSG00000083067, intron 1 of 24)	full_rescue	NA
chr9-71146001-71147000	-37.6847	group_4	ENSG00000083067	TRPM3	Intron (ENST00000357533/ENSG00000083067, intron 1 of 24)	full_rescue	NA
chr9-71002001-71003000	-33.4259	group_3	ENSG00000083067	TRPM3	Intron (ENST00000677713/ENSG00000083067, intron 1 of 25)	full_rescue	NA
chr9-70581001-70582000	-58.3333	group_2	ENSG00000083067	TRPM3	Intron (ENST00000677713/ENSG00000083067, intron 22 of 25)	no_rescue	NA
chr9-70512001-70513000	-32.3529	group_4	ENSG00000272232	RN7SL726P	Distal Intergenic	full_rescue	NA
chr9-70480001-70481000	-38.4807	group_1	ENSG00000119138	KLF9	Distal Intergenic	no_rescue	GH_only
chr9-70389001-70390000	-31.4286	group_4	ENSG00000119138	KLF9	Intron (ENST00000377126/ENSG00000119138, intron 1 of 1)	full_rescue	GH_only
chr9-69977001-69978000	-29.4118	group_4	ENSG00000165072	MAMDC2	Distal Intergenic	full_rescue	NA
chr9-69883001-69884000	-27.1914	group_3	ENSG00000204711	C9orf135	Intron (ENST00000377197/ENSG00000204711, intron 4 of 5)	full_rescue	NA
chr9-69645001-69646000	-26.3564	group_3	ENSG00000107282	APBA1	Intron (ENST00000265381/ENSG00000107282, intron 1 of 12)	full_rescue	NA
chr9-69078001-69079000	-70.9582	group_1	ENSG00000165060	FXN	3' UTR	no_rescue	NA
chr9-69012001-69013000	-45.1016	group_3	ENSG00000165059	PRKACG	3' UTR	full_rescue	CGI_only
chr9-68852001-68853000	-35.2941	group_4	ENSG00000107242	PIP5K1B	Intron (ENST00000265382/ENSG00000107242, intron 4 of 15)	full_rescue	NA
chr9-68530001-68531000	-57.4561	group_3	ENSG00000154330	PGM5	3' UTR	full_rescue	GH_only
chr9-68509001-68510000	-37.6101	group_2	ENSG00000154330	PGM5	Intron (ENST00000396396/ENSG00000154330, intron 10 of 10)	full_rescue	GH_only
chr9-68307001-68308000	-31.6031	group_1	ENSG00000225337	RP11-561O23.7	Promoter (<=1kb)	full_rescue	CGI_only
chr9-67712001-67713000	-40.7295	group_1	ENSG00000286079	NA	Distal Intergenic	no_rescue	CGI_only
chr9-6691001-6692000	-31.0714	group_4	ENSG00000229611	RP11-390F4.10	Distal Intergenic	full_rescue	GH_only
chr9-66783001-66784000	-51.8519	group_4	ENSG00000276457	FKBP4P8	Distal Intergenic	full_rescue	NA
chr9-6662001-6663000	-27.6202	group_4	ENSG00000229057	RPS3AP54	Promoter (<=1kb)	full_rescue	NA
chr9-6646001-6647000	-37.963	group_4	ENSG00000236924	RP11-390F4.6	Promoter (<=1kb)	full_rescue	CGI_and_GH
chr9-66200001-66201000	-42.8893	group_3	ENSG00000284658	NA	Distal Intergenic	partial_rescue	NA
chr9-66153001-66154000	-37.2036	group_1	ENSG00000276203	ANKRD20A3	5' UTR	full_rescue	CGI_only
chr9-65714001-65715000	-51.4785	group_2	ENSG00000147996	CBWD5	Intron (ENST00000382405/ENSG00000147996, intron 10 of 14)	full_rescue	NA
chr9-65546001-65547000	-35.7143	group_4	ENSG00000276723	Y_RNA	Distal Intergenic	full_rescue	NA
chr9-6552001-6553000	-34.7144	group_4	ENSG00000178445	GLDC	Intron (ENST00000639639/ENSG00000178445, intron 2 of 6)	full_rescue	GH_only
chr9-65492001-65493000	-35.0649	group_4	ENSG00000276723	Y_RNA	Distal Intergenic	full_rescue	NA
chr9-65491001-65492000	-39.4435	group_3	ENSG00000276723	Y_RNA	Distal Intergenic	full_rescue	NA
chr9-65490001-65491000	-37.2024	group_2	ENSG00000276723	Y_RNA	Distal Intergenic	full_rescue	NA
chr9-65489001-65490000	-25.1381	group_4	ENSG00000276723	Y_RNA	Distal Intergenic	full_rescue	NA
chr9-65488001-65489000	-40	group_2	ENSG00000276723	Y_RNA	Distal Intergenic	full_rescue	NA
chr9-65474001-65475000	-29.8851	group_4	ENSG00000287329	NA	Distal Intergenic	full_rescue	NA
chr9-65473001-65474000	-27.4578	group_2	ENSG00000287329	NA	Distal Intergenic	full_rescue	NA
chr9-65471001-65472000	-50.3207	group_4	ENSG00000287329	NA	Distal Intergenic	full_rescue	NA
chr9-65461001-65462000	-25.2855	group_4	ENSG00000287329	NA	Distal Intergenic	full_rescue	NA
chr9-65460001-65461000	-27.5013	group_4	ENSG00000287329	NA	Distal Intergenic	full_rescue	NA
chr9-65456001-65457000	-33.1695	group_3	ENSG00000287329	NA	Distal Intergenic	full_rescue	NA
chr9-65455001-65456000	-37.1917	group_3	ENSG00000287329	NA	Distal Intergenic	full_rescue	NA
chr9-65451001-65452000	-47.9693	group_3	ENSG00000287329	NA	Distal Intergenic	full_rescue	NA
chr9-65445001-65446000	-41.0814	group_4	ENSG00000287329	NA	Distal Intergenic	full_rescue	NA
chr9-65444001-65445000	-35.5556	group_4	ENSG00000287329	NA	Distal Intergenic	partial_rescue	NA
chr9-65441001-65442000	-34.8188	group_3	ENSG00000287329	NA	Distal Intergenic	full_rescue	NA
chr9-65427001-65428000	-51.2821	group_3	ENSG00000287329	NA	Distal Intergenic	full_rescue	NA
chr9-65411001-65412000	-55.2217	group_3	ENSG00000287329	NA	Distal Intergenic	full_rescue	NA
chr9-65410001-65411000	-25.3848	group_3	ENSG00000287329	NA	Distal Intergenic	full_rescue	NA
chr9-65406001-65407000	-39.9716	group_4	ENSG00000287329	NA	Distal Intergenic	full_rescue	NA
chr9-65404001-65405000	-45.3388	group_3	ENSG00000287329	NA	Distal Intergenic	full_rescue	NA
chr9-65401001-65402000	-26.3643	group_3	ENSG00000287329	NA	Distal Intergenic	full_rescue	NA
chr9-65395001-65396000	-41.6403	group_4	ENSG00000287329	NA	Exon (ENST00000655595/ENSG00000287329, exon 2 of 2)	full_rescue	NA
chr9-65393001-65394000	-25.6944	group_4	ENSG00000287329	NA	Intron (ENST00000655595/ENSG00000287329, intron 1 of 1)	full_rescue	NA
chr9-65386001-65387000	-60.3316	group_3	ENSG00000287329	NA	Promoter (<=1kb)	partial_rescue	NA
chr9-65385001-65386000	-32.5183	group_4	ENSG00000287329	NA	Promoter (<=1kb)	full_rescue	NA
chr9-65383001-65384000	-37.1437	group_4	ENSG00000287329	NA	Promoter (1-2kb)	full_rescue	NA
chr9-65062001-65063000	-30.5451	group_4	ENSG00000287988	NA	Distal Intergenic	full_rescue	NA
chr9-64890001-64891000	-26.5627	group_4	ENSG00000223602	AC125634.1	Promoter (<=1kb)	full_rescue	NA
chr9-64888001-64889000	-52.5261	group_4	ENSG00000223602	AC125634.1	Promoter (<=1kb)	full_rescue	NA
chr9-64775001-64776000	-26.0714	group_1	ENSG00000156755	IGKV1OR-2	Distal Intergenic	full_rescue	CGI_only
chr9-64488001-64489000	-75	group_3	ENSG00000235310	GXYLT1P6	Promoter (<=1kb)	partial_rescue	CGI_only
chr9-64463001-64464000	-27.027	group_4	ENSG00000229156	RP11-250H24.2	Promoter (<=1kb)	full_rescue	NA
chr9-64072001-64073000	-28.2828	group_4	ENSG00000275068	U6	Promoter (<=1kb)	full_rescue	CGI_only
chr9-64029001-64030000	-31.6431	group_4	ENSG00000204790	BX255923.2	Intron (ENST00000680973/ENSG00000288690, intron 4 of 6)	full_rescue	NA
chr9-64019001-64020000	-66.0784	group_3	ENSG00000204790	BX255923.2	Intron (ENST00000680973/ENSG00000288690, intron 1 of 6)	full_rescue	CGI_only
chr9-64016001-64017000	-34.1977	group_4	ENSG00000204790	BX255923.2	Promoter (<=1kb)	full_rescue	NA
chr9-64014001-64015000	-25.6111	group_3	ENSG00000204790	BX255923.2	Promoter (1-2kb)	full_rescue	NA
chr9-64013001-64014000	-33.6371	group_3	ENSG00000204790	BX255923.2	Distal Intergenic	full_rescue	NA
chr9-63979001-63980000	-27.1153	group_3	ENSG00000204790	BX255923.2	Intron (ENST00000485382/ENSG00000204790, intron 6 of 6)	full_rescue	NA
chr9-63913001-63914000	-38.6967	group_4	ENSG00000215548	FRG1JP	Distal Intergenic	full_rescue	NA
chr9-63912001-63913000	-32.6338	group_4	ENSG00000215548	FRG1JP	Distal Intergenic	full_rescue	NA
chr9-63905001-63906000	-33.2613	group_3	ENSG00000215548	FRG1JP	Distal Intergenic	full_rescue	NA
chr9-63897001-63898000	-41.4634	group_1	ENSG00000215548	FRG1JP	Distal Intergenic	full_rescue	NA
chr9-63893001-63894000	-54.4118	group_2	ENSG00000215548	FRG1JP	Distal Intergenic	full_rescue	NA
chr9-63859001-63860000	-31.1238	group_4	ENSG00000215548	FRG1JP	Promoter (<=1kb)	full_rescue	CGI_only
chr9-63834001-63835000	-69.0476	group_3	ENSG00000215548	FRG1JP	Exon (ENST00000376334/ENSG00000215548, exon 7 of 9)	full_rescue	NA
chr9-63821001-63822000	-48.8085	group_3	ENSG00000266017	MIR4477B	Distal Intergenic	full_rescue	NA
chr9-63815001-63816000	-43.0314	group_3	ENSG00000225411	RP11-764K9.1	Promoter (<=1kb)	full_rescue	CGI_only
chr9-63814001-63815000	-31.8683	group_3	ENSG00000225411	RP11-764K9.1	Promoter (<=1kb)	full_rescue	CGI_only
chr9-63813001-63814000	-42.8817	group_3	ENSG00000207277	RNA5SP284	Promoter (<=1kb)	full_rescue	CGI_only
chr9-63811001-63812000	-33.8095	group_3	ENSG00000225411	RP11-764K9.1	Exon (ENST00000417843/ENSG00000225411, exon 2 of 5)	full_rescue	CGI_only
chr9-63789001-63790000	-61.3636	group_2	ENSG00000239684	PTGER4P3	Distal Intergenic	full_rescue	NA
chr9-63781001-63782000	-40.013	group_4	ENSG00000239684	PTGER4P3	Distal Intergenic	full_rescue	CGI_only
chr9-63756001-63757000	-33.7793	group_2	ENSG00000228656	MYO5BP3	Distal Intergenic	full_rescue	NA
chr9-63729001-63730000	-54.6096	group_3	ENSG00000225360	RP11-149F8.4	Promoter (<=1kb)	full_rescue	NA
chr9-63711001-63712000	-57.6199	group_2	ENSG00000268951	RP11-149F8.3	Distal Intergenic	full_rescue	NA
chr9-63708001-63709000	-45.9398	group_3	ENSG00000234042	RP11-452D2.2	Distal Intergenic	full_rescue	NA
chr9-63707001-63708000	-27.2781	group_4	ENSG00000234042	RP11-452D2.2	Distal Intergenic	full_rescue	NA
chr9-63702001-63703000	-28.2895	group_4	ENSG00000234042	RP11-452D2.2	Promoter (<=1kb)	full_rescue	CGI_only
chr9-63686001-63687000	-31.1765	group_4	ENSG00000234042	RP11-452D2.2	Distal Intergenic	full_rescue	NA
chr9-63379001-63380000	-49.1265	group_3	ENSG00000237238	BMS1P10	Exon (ENST00000647845/ENSG00000237238, exon 2 of 12)	full_rescue	NA
chr9-62915001-62916000	-33.4196	group_2	ENSG00000273509	CNTNAP3P1	Distal Intergenic	full_rescue	CGI_only
chr9-62865001-62866000	-33.1908	group_1	ENSG00000234665	RP11-262H14.3	Exon (ENST00000667349/ENSG00000234665, exon 5 of 5)	full_rescue	NA
chr9-62862001-62863000	-37.5729	group_3	ENSG00000227582	ADGRF5P1	Exon (ENST00000435875/ENSG00000227582, exon 1 of 1)	partial_rescue	NA
chr9-62857001-62858000	-48.3262	group_3	ENSG00000238245	MYO5BP2	Promoter (<=1kb)	full_rescue	NA
chr9-62850001-62851000	-45.8678	group_4	ENSG00000237451	CDK2AP2P2	Distal Intergenic	full_rescue	NA
chr9-62844001-62845000	-42.4061	group_1	ENSG00000237451	CDK2AP2P2	Promoter (<=1kb)	no_rescue	NA
chr9-62843001-62844000	-51.3627	group_1	ENSG00000184523	PTGER4P2	Exon (ENST00000650319/ENSG00000184523, exon 2 of 2)	full_rescue	NA
chr9-62840001-62841000	-26.289	group_2	ENSG00000184523	PTGER4P2	Intron (ENST00000650319/ENSG00000184523, intron 1 of 1)	full_rescue	CGI_only
chr9-62830001-62831000	-26.1958	group_1	ENSG00000229422	RP11-262H14.5	Distal Intergenic	full_rescue	CGI_only
chr9-62825001-62826000	-30.5135	group_1	ENSG00000229422	RP11-262H14.5	Distal Intergenic	partial_rescue	NA
chr9-6267001-6268000	-34.7826	group_4	ENSG00000228132	RP11-279E1.1	Distal Intergenic	full_rescue	NA
chr9-6218001-6219000	-64.1711	group_3	ENSG00000137033	IL33	Intron (ENST00000417746/ENSG00000137033, intron 1 of 4)	full_rescue	NA
chr9-61683001-61684000	-45.4545	group_3	ENSG00000231454	RP11-160N1.8	Distal Intergenic	full_rescue	NA
chr9-61680001-61681000	-66.174	group_3	ENSG00000231454	RP11-160N1.8	Distal Intergenic	full_rescue	NA
chr9-61673001-61674000	-26.3014	group_4	ENSG00000231454	RP11-160N1.8	Distal Intergenic	full_rescue	NA
chr9-61672001-61673000	-25.5662	group_4	ENSG00000231454	RP11-160N1.8	Distal Intergenic	full_rescue	NA
chr9-61670001-61671000	-25.9252	group_4	ENSG00000231454	RP11-160N1.8	Distal Intergenic	full_rescue	NA
chr9-61669001-61670000	-33.1243	group_4	ENSG00000231454	RP11-160N1.8	Distal Intergenic	full_rescue	NA
chr9-61573001-61574000	-30.1253	group_4	ENSG00000277109	RP11-160N1.11	Distal Intergenic	full_rescue	NA
chr9-61558001-61559000	-81.4815	group_3	ENSG00000277109	RP11-160N1.11	Distal Intergenic	partial_rescue	NA
chr9-61557001-61558000	-28.4313	group_2	ENSG00000277109	RP11-160N1.11	Distal Intergenic	full_rescue	NA
chr9-61523001-61524000	-49.1657	group_2	ENSG00000277109	RP11-160N1.11	Distal Intergenic	full_rescue	NA
chr9-6079001-6080000	-25.5232	group_4	ENSG00000228739	RP11-218I7.2	Distal Intergenic	full_rescue	NA
chr9-5869001-5870000	-51.1029	group_3	ENSG00000223621	AK4P4	Distal Intergenic	full_rescue	NA
chr9-5327001-5328000	-33.4198	group_2	ENSG00000107018	RLN1	Distal Intergenic	full_rescue	NA
chr9-5191001-5192000	-34.0291	group_3	ENSG00000237553	RP11-140C18.2	Downstream (1-2kb)	partial_rescue	NA
chr9-5086001-5087000	-48.3684	group_4	ENSG00000182347	PDSS1P1	Promoter (<=1kb)	full_rescue	NA
chr9-5043001-5044000	-65.1261	group_4	ENSG00000096968	JAK2	Intron (ENST00000636127/ENSG00000096968, intron 4 of 15)	full_rescue	CGI_only
chr9-5042001-5043000	-34.2	group_4	ENSG00000096968	JAK2	Intron (ENST00000636127/ENSG00000096968, intron 4 of 15)	full_rescue	CGI_only
chr9-4694001-4695000	-33.3067	group_4	ENSG00000106993	CDC37L1	Intron (ENST00000381858/ENSG00000106993, intron 3 of 6)	full_rescue	NA
chr9-4663001-4664000	-38.9012	group_2	ENSG00000106686	SPATA6L	3' UTR	partial_rescue	CGI_and_GH
chr9-4605001-4606000	-66.5622	group_3	ENSG00000106686	SPATA6L	3' UTR	partial_rescue	NA
chr9-43354001-43355000	-36.2499	group_4	ENSG00000286916	NA	Distal Intergenic	full_rescue	NA
chr9-43353001-43354000	-50.4785	group_4	ENSG00000286916	NA	Distal Intergenic	full_rescue	NA
chr9-43352001-43353000	-33.3484	group_4	ENSG00000286916	NA	Distal Intergenic	full_rescue	NA
chr9-43350001-43351000	-44.8333	group_4	ENSG00000286916	NA	Distal Intergenic	full_rescue	NA
chr9-43349001-43350000	-27.3369	group_4	ENSG00000286916	NA	Distal Intergenic	full_rescue	NA
chr9-43348001-43349000	-34.9727	group_4	ENSG00000286916	NA	Distal Intergenic	full_rescue	NA
chr9-43347001-43348000	-50.9962	group_4	ENSG00000286916	NA	Distal Intergenic	full_rescue	NA
chr9-43345001-43346000	-41.8641	group_4	ENSG00000286916	NA	Distal Intergenic	full_rescue	NA
chr9-43342001-43343000	-42.1842	group_4	ENSG00000286916	NA	Distal Intergenic	full_rescue	NA
chr9-43341001-43342000	-38.2453	group_4	ENSG00000286916	NA	Distal Intergenic	full_rescue	NA
chr9-43340001-43341000	-34.893	group_4	ENSG00000286916	NA	Distal Intergenic	full_rescue	NA
chr9-43339001-43340000	-44.3007	group_4	ENSG00000286916	NA	Distal Intergenic	full_rescue	NA
chr9-43337001-43338000	-33.6784	group_4	ENSG00000286916	NA	Distal Intergenic	full_rescue	NA
chr9-43336001-43337000	-63.6364	group_3	ENSG00000286916	NA	Distal Intergenic	full_rescue	NA
chr9-43335001-43336000	-31.7741	group_4	ENSG00000286916	NA	Distal Intergenic	full_rescue	NA
chr9-43334001-43335000	-34.2138	group_3	ENSG00000286916	NA	Distal Intergenic	full_rescue	NA
chr9-43331001-43332000	-44.8	group_3	ENSG00000286916	NA	Distal Intergenic	full_rescue	NA
chr9-43330001-43331000	-29.3403	group_4	ENSG00000286916	NA	Distal Intergenic	full_rescue	NA
chr9-43329001-43330000	-31.9447	group_4	ENSG00000286916	NA	Distal Intergenic	full_rescue	NA
chr9-43328001-43329000	-34.6522	group_4	ENSG00000286916	NA	Distal Intergenic	full_rescue	NA
chr9-43327001-43328000	-56.3896	group_3	ENSG00000286916	NA	Distal Intergenic	full_rescue	NA
chr9-43326001-43327000	-57.7878	group_4	ENSG00000286916	NA	Distal Intergenic	full_rescue	NA
chr9-43325001-43326000	-65.8219	group_3	ENSG00000286916	NA	Distal Intergenic	full_rescue	NA
chr9-43324001-43325000	-45.219	group_3	ENSG00000286916	NA	Distal Intergenic	full_rescue	NA
chr9-43323001-43324000	-45.4576	group_3	ENSG00000286916	NA	Distal Intergenic	full_rescue	NA
chr9-43322001-43323000	-44.509	group_4	ENSG00000286916	NA	Distal Intergenic	full_rescue	NA
chr9-43321001-43322000	-25.4287	group_4	ENSG00000286916	NA	Distal Intergenic	full_rescue	NA
chr9-43320001-43321000	-37.3857	group_4	ENSG00000286916	NA	Distal Intergenic	full_rescue	NA
chr9-43319001-43320000	-31.5214	group_4	ENSG00000286916	NA	Distal Intergenic	full_rescue	NA
chr9-43318001-43319000	-35.0203	group_4	ENSG00000286916	NA	Distal Intergenic	full_rescue	NA
chr9-43317001-43318000	-26.7164	group_4	ENSG00000286916	NA	Distal Intergenic	full_rescue	NA
chr9-43312001-43313000	-81.1108	group_3	ENSG00000286916	NA	Distal Intergenic	full_rescue	CGI_only
chr9-43311001-43312000	-91.7745	group_3	ENSG00000286916	NA	Distal Intergenic	full_rescue	CGI_only
chr9-43310001-43311000	-91.4441	group_3	ENSG00000286916	NA	Distal Intergenic	full_rescue	CGI_only
chr9-43296001-43297000	-63.0952	group_4	ENSG00000286916	NA	Distal Intergenic	full_rescue	NA
chr9-43276001-43277000	-50.7837	group_3	ENSG00000286916	NA	Distal Intergenic	full_rescue	NA
chr9-43122001-43123000	-34.1783	group_4	ENSG00000277737	FP325317.1	Intron (ENST00000539936/ENSG00000277737, intron 1 of 6)	full_rescue	NA
chr9-42804001-42805000	-46.5241	group_2	ENSG00000204818	ADGRF5P2	Distal Intergenic	full_rescue	NA
chr9-42792001-42793000	-63.5514	group_2	ENSG00000287276	NA	Intron (ENST00000652898/ENSG00000287276, intron 3 of 7)	no_rescue	NA
chr9-42759001-42760000	-39.9371	group_1	ENSG00000287276	NA	Exon (ENST00000664350/ENSG00000287276, exon 3 of 6)	partial_rescue	NA
chr9-4274001-4275000	-53.8961	group_2	ENSG00000107249	GLIS3	Intron (ENST00000381971/ENSG00000107249, intron 2 of 10)	no_rescue	NA
chr9-42503001-42504000	-31.1104	group_4	ENSG00000227924	RBPJP6	Distal Intergenic	full_rescue	NA
chr9-4218001-4219000	-31.4456	group_3	ENSG00000107249	GLIS3	Intron (ENST00000381971/ENSG00000107249, intron 2 of 10)	no_rescue	NA
chr9-41953001-41954000	-66.3483	group_3	ENSG00000154529	CNTNAP3B	Exon (ENST00000612828/ENSG00000154529, exon 13 of 23)	partial_rescue	CGI_only
chr9-41850001-41851000	-26.3158	group_4	ENSG00000275297	RP11-292F9.1	Distal Intergenic	full_rescue	NA
chr9-41663001-41664000	-36.0734	group_1	ENSG00000275239	RP11-157L3.12	Intron (ENST00000611780/ENSG00000275239, intron 2 of 2)	full_rescue	CGI_only
chr9-41654001-41655000	-46.6667	group_2	ENSG00000276412	RP11-157L3.9	Promoter (<=1kb)	no_rescue	CGI_only
chr9-41653001-41654000	-41.5685	group_2	ENSG00000276412	RP11-157L3.9	Promoter (<=1kb)	full_rescue	CGI_only
chr9-41644001-41645000	-25.4035	group_3	ENSG00000278077	RP11-157L3.10	Promoter (<=1kb)	full_rescue	NA
chr9-41358001-41359000	-35.2832	group_2	ENSG00000276832	RP11-187C18.4	Distal Intergenic	full_rescue	CGI_only
chr9-41355001-41356000	-58.5432	group_4	ENSG00000276832	RP11-187C18.4	Promoter (<=1kb)	full_rescue	NA
chr9-41354001-41355000	-56.8854	group_4	ENSG00000276832	RP11-187C18.4	Promoter (<=1kb)	full_rescue	NA
chr9-41280001-41281000	-26.4667	group_2	ENSG00000278647	CDK2AP2P1	Promoter (<=1kb)	full_rescue	NA
chr9-41275001-41276000	-49.0472	group_3	ENSG00000275450	PTGER4P2-CDK2AP2P2	Promoter (<=1kb)	full_rescue	CGI_only
chr9-41272001-41273000	-27.7971	group_2	ENSG00000279561	RP11-4L24.4	Promoter (<=1kb)	full_rescue	CGI_only
chr9-41269001-41270000	-38.2393	group_1	ENSG00000279561	RP11-4L24.4	Exon (ENST00000624675/ENSG00000279561, exon 2 of 2)	no_rescue	NA
chr9-41266001-41267000	-37.037	group_1	ENSG00000279561	RP11-4L24.4	Downstream (2-3kb)	no_rescue	CGI_only
chr9-41261001-41262000	-48.0263	group_1	ENSG00000279561	RP11-4L24.4	Distal Intergenic	full_rescue	NA
chr9-41237001-41238000	-36.3785	group_3	ENSG00000277049	5S_rRNA	Promoter (<=1kb)	full_rescue	CGI_only
chr9-41235001-41236000	-50.4505	group_3	ENSG00000276029	MIR4477A	Downstream (1-2kb)	full_rescue	CGI_only
chr9-41106001-41107000	-42.7158	group_3	ENSG00000276291	FRG1HP	Exon (ENST00000620833/ENSG00000276462, exon 1 of 4)	full_rescue	NA
chr9-41087001-41088000	-37.9187	group_2	ENSG00000276291	FRG1HP	Intron (ENST00000617940/ENSG00000276291, intron 5 of 9)	full_rescue	NA
chr9-41074001-41075000	-35.0693	group_1	ENSG00000277778	PGM5P2	Promoter (<=1kb)	full_rescue	CGI_only
chr9-40938001-40939000	-39.5916	group_3	ENSG00000275377	MIR1299	Distal Intergenic	full_rescue	NA
chr9-40930001-40931000	-48.3439	group_3	ENSG00000275377	MIR1299	Promoter (<=1kb)	full_rescue	NA
chr9-40927001-40928000	-26.5421	group_3	ENSG00000275377	MIR1299	Downstream (1-2kb)	full_rescue	NA
chr9-40925001-40926000	-29.9872	group_4	ENSG00000275377	MIR1299	Distal Intergenic	full_rescue	NA
chr9-40914001-40915000	-30.0371	group_3	ENSG00000275377	MIR1299	Distal Intergenic	full_rescue	NA
chr9-40910001-40911000	-26.3484	group_3	ENSG00000275377	MIR1299	Distal Intergenic	full_rescue	NA
chr9-40909001-40910000	-27.6285	group_3	ENSG00000275377	MIR1299	Distal Intergenic	full_rescue	NA
chr9-40874001-40875000	-41.854	group_3	ENSG00000276868	RP11-318K12.3	Distal Intergenic	full_rescue	NA
chr9-40584001-40585000	-60.3506	group_1	ENSG00000276500	BMS1P14	Distal Intergenic	no_rescue	NA
chr9-38671001-38672000	-44.7174	group_3	ENSG00000252725	RNU6-765P	Distal Intergenic	full_rescue	NA
chr9-38427001-38428000	-33.2941	group_4	ENSG00000137142	IGFBPL1	Distal Intergenic	partial_rescue	NA
chr9-38417001-38418000	-32.3906	group_4	ENSG00000137142	IGFBPL1	Intron (ENST00000377694/ENSG00000137142, intron 1 of 4)	full_rescue	NA
chr9-38270001-38271000	-44.368	group_4	ENSG00000223716	RP11-113O24.3	Distal Intergenic	full_rescue	NA
chr9-38261001-38262000	-29.1262	group_4	ENSG00000223716	RP11-113O24.3	Distal Intergenic	partial_rescue	NA
chr9-38240001-38241000	-34.7826	group_4	ENSG00000200026	U8	Distal Intergenic	partial_rescue	CGI_only
chr9-38111001-38112000	-32.4159	group_4	ENSG00000200026	U8	Distal Intergenic	full_rescue	NA
chr9-38026001-38027000	-26.6092	group_3	ENSG00000107338	SHB	Intron (ENST00000540557/ENSG00000255872, intron 1 of 11)	full_rescue	GH_only
chr9-37972001-37973000	-30.9144	group_4	ENSG00000107338	SHB	Intron (ENST00000540557/ENSG00000255872, intron 4 of 11)	full_rescue	GH_only
chr9-37802001-37803000	-33.9612	group_3	ENSG00000122741	DCAF10	Intron (ENST00000242323/ENSG00000122741, intron 1 of 6)	full_rescue	CGI_and_GH
chr9-37723001-37724000	-27.2727	group_4	ENSG00000070601	FRMPD1	Intron (ENST00000377765/ENSG00000070601, intron 6 of 15)	partial_rescue	NA
chr9-37627001-37628000	-43.1746	group_3	ENSG00000255872	RP11-613M10.9	Intron (ENST00000540557/ENSG00000255872, intron 11 of 11)	full_rescue	NA
chr9-37028001-37029000	-40.207	group_1	ENSG00000196092	PAX5	Intron (ENST00000358127/ENSG00000196092, intron 1 of 9)	no_rescue	CGI_and_GH
chr9-37025001-37026000	-31.5082	group_1	ENSG00000196092	PAX5	5' UTR	full_rescue	CGI_and_GH
chr9-37011001-37012000	-43.9663	group_3	ENSG00000196092	PAX5	Intron (ENST00000358127/ENSG00000196092, intron 3 of 9)	full_rescue	GH_only
chr9-36991001-36992000	-45.7849	group_1	ENSG00000196092	PAX5	Intron (ENST00000358127/ENSG00000196092, intron 5 of 9)	no_rescue	GH_only
chr9-36989001-36990000	-34.2343	group_2	ENSG00000196092	PAX5	Intron (ENST00000358127/ENSG00000196092, intron 5 of 9)	partial_rescue	GH_only
chr9-36985001-36986000	-44.9959	group_1	ENSG00000196092	PAX5	Intron (ENST00000358127/ENSG00000196092, intron 5 of 9)	no_rescue	CGI_and_GH
chr9-36981001-36982000	-32.0999	group_3	ENSG00000196092	PAX5	Intron (ENST00000358127/ENSG00000196092, intron 5 of 9)	full_rescue	GH_only
chr9-36892001-36893000	-26.7008	group_3	ENSG00000196092	PAX5	Intron (ENST00000358127/ENSG00000196092, intron 7 of 9)	full_rescue	NA
chr9-36868001-36869000	-36.2613	group_4	ENSG00000196092	PAX5	Intron (ENST00000358127/ENSG00000196092, intron 8 of 9)	full_rescue	NA
chr9-36854001-36855000	-45.4762	group_2	ENSG00000196092	PAX5	Intron (ENST00000358127/ENSG00000196092, intron 8 of 9)	full_rescue	NA
chr9-36819001-36820000	-35.6673	group_1	ENSG00000287514	NA	Intron (ENST00000658385/ENSG00000287514, intron 2 of 2)	no_rescue	NA
chr9-36818001-36819000	-46.9089	group_1	ENSG00000287514	NA	Intron (ENST00000658385/ENSG00000287514, intron 2 of 2)	no_rescue	NA
chr9-36788001-36789000	-39.8655	group_2	ENSG00000287514	NA	Intron (ENST00000670495/ENSG00000287514, intron 2 of 2)	partial_rescue	NA
chr9-36754001-36755000	-39.0821	group_4	ENSG00000288571	NA	Distal Intergenic	full_rescue	NA
chr9-36748001-36749000	-43.7928	group_2	ENSG00000288571	NA	Distal Intergenic	full_rescue	NA
chr9-36740001-36741000	-54.7826	group_2	ENSG00000288571	NA	Distal Intergenic	no_rescue	CGI_only
chr9-36739001-36740000	-83.4174	group_1	ENSG00000288571	NA	Distal Intergenic	no_rescue	CGI_only
chr9-36435001-36436000	-28.6713	group_4	ENSG00000137075	RNF38	Intron (ENST00000488058/ENSG00000137075, intron 1 of 3)	full_rescue	NA
chr9-36416001-36417000	-53.3333	group_2	ENSG00000137075	RNF38	Intron (ENST00000488058/ENSG00000137075, intron 2 of 3)	full_rescue	NA
chr9-36345001-36346000	-52.795	group_4	ENSG00000137075	RNF38	Intron (ENST00000353739/ENSG00000137075, intron 8 of 10)	full_rescue	NA
chr9-36259001-36260000	-25.3047	group_4	ENSG00000122705	CLTA	Intron (ENST00000464497/ENSG00000122705, intron 4 of 7)	full_rescue	CGI_and_GH
chr9-36172001-36173000	-27.9201	group_4	ENSG00000185972	CCIN	Distal Intergenic	full_rescue	NA
chr9-36171001-36172000	-43.6364	group_4	ENSG00000185972	CCIN	3' UTR	full_rescue	NA
chr9-36147001-36148000	-35.1446	group_3	ENSG00000122694	GLIPR2	Exon (ENST00000396613/ENSG00000122694, exon 2 of 3)	partial_rescue	GH_only
chr9-36127001-36128000	-29.3763	group_4	ENSG00000122694	GLIPR2	Distal Intergenic	full_rescue	GH_only
chr9-35924001-35925000	-26.4996	group_4	ENSG00000235387	LINC00961	Intron (ENST00000638062/ENSG00000235387, intron 3 of 6)	full_rescue	GH_only
chr9-35564001-35565000	-34.2857	group_3	ENSG00000215187	FAM166B	Promoter (<=1kb)	full_rescue	GH_only
chr9-35521001-35522000	-41.2698	group_3	ENSG00000198853	RUSC2	Intron (ENST00000361226/ENSG00000198853, intron 1 of 11)	full_rescue	GH_only
chr9-35416001-35417000	-31.5946	group_3	ENSG00000179766	ATP8B5P	Intron (ENST00000430846/ENSG00000179766, intron 2 of 9)	full_rescue	NA
chr9-354001-355000	-28.5714	group_4	ENSG00000107099	DOCK8	Intron (ENST00000432829/ENSG00000107099, intron 14 of 47)	full_rescue	NA
chr9-35281001-35282000	-37.1002	group_2	ENSG00000198722	UNC13B	Intron (ENST00000617908/ENSG00000198722, intron 7 of 40)	full_rescue	NA
chr9-35185001-35186000	-26.3158	group_4	ENSG00000198722	UNC13B	Intron (ENST00000617908/ENSG00000198722, intron 1 of 40)	partial_rescue	NA
chr9-35109001-35110000	-30.3166	group_4	ENSG00000005238	FAM214B	5' UTR	full_rescue	CGI_and_GH
chr9-35034001-35035000	-27.5	group_4	ENSG00000174038	C9orf131	Distal Intergenic	full_rescue	NA
chr9-34958001-34959000	-38.0191	group_1	ENSG00000122733	PHF24	Promoter (<=1kb)	full_rescue	CGI_only
chr9-34836001-34837000	-40	group_4	ENSG00000257198	FAM205BP	Exon (ENST00000399773/ENSG00000257198, exon 4 of 4)	full_rescue	NA
chr9-34810001-34811000	-51.0019	group_3	ENSG00000287368	NA	Promoter (<=1kb)	full_rescue	CGI_only
chr9-34809001-34810000	-38.9216	group_1	ENSG00000287368	NA	Promoter (<=1kb)	no_rescue	CGI_only
chr9-34803001-34804000	-35.7143	group_4	ENSG00000287368	NA	Distal Intergenic	full_rescue	NA
chr9-34797001-34798000	-62.3975	group_3	ENSG00000287368	NA	Distal Intergenic	full_rescue	NA
chr9-34627001-34628000	-25	group_2	ENSG00000205143	ARID3C	Promoter (<=1kb)	full_rescue	CGI_only
chr9-34624001-34625000	-37.1753	group_1	ENSG00000205143	ARID3C	Exon (ENST00000378909/ENSG00000205143, exon 3 of 7)	no_rescue	CGI_and_GH
chr9-34623001-34624000	-75.7632	group_2	ENSG00000205143	ARID3C	Exon (ENST00000378909/ENSG00000205143, exon 3 of 7)	no_rescue	CGI_and_GH
chr9-34622001-34623000	-28.0293	group_3	ENSG00000205143	ARID3C	Exon (ENST00000378909/ENSG00000205143, exon 5 of 7)	full_rescue	CGI_and_GH
chr9-34600001-34601000	-43.5897	group_4	ENSG00000122756	CNTFR	Distal Intergenic	full_rescue	NA
chr9-34592001-34593000	-27.1044	group_1	ENSG00000122756	CNTFR	Promoter (1-2kb)	no_rescue	CGI_and_GH
chr9-34588001-34589000	-27.1946	group_1	ENSG00000122756	CNTFR	Intron (ENST00000351266/ENSG00000122756, intron 1 of 8)	full_rescue	CGI_and_GH
chr9-34587001-34588000	-27.4893	group_3	ENSG00000122756	CNTFR	Intron (ENST00000351266/ENSG00000122756, intron 1 of 8)	full_rescue	CGI_and_GH
chr9-34586001-34587000	-42.0142	group_1	ENSG00000122756	CNTFR	Intron (ENST00000351266/ENSG00000122756, intron 1 of 8)	no_rescue	NA
chr9-34568001-34569000	-34.7458	group_3	ENSG00000237159	CNTFR-AS1	Promoter (<=1kb)	partial_rescue	NA
chr9-34559001-34560000	-29.1906	group_3	ENSG00000122756	CNTFR	Intron (ENST00000351266/ENSG00000122756, intron 3 of 8)	no_rescue	NA
chr9-34550001-34551000	-28.1467	group_4	ENSG00000232983	RP11-296L22.7	Downstream (<1kb)	partial_rescue	NA
chr9-34548001-34549000	-34.4531	group_2	ENSG00000232983	RP11-296L22.7	Promoter (1-2kb)	partial_rescue	NA
chr9-34494001-34495000	-26.25	group_2	ENSG00000122735	DNAI1	Intron (ENST00000614641/ENSG00000122735, intron 9 of 19)	partial_rescue	NA
chr9-34228001-34229000	-36.8421	group_4	ENSG00000165006	UBAP1	Intron (ENST00000625521/ENSG00000165006, intron 1 of 5)	full_rescue	NA
chr9-33955001-33956000	-44.1137	group_3	ENSG00000137073	UBAP2	Intron (ENST00000379238/ENSG00000137073, intron 11 of 28)	no_rescue	NA
chr9-33831001-33832000	-35.7143	group_4	ENSG00000107341	UBE2R2	Exon (ENST00000363964/ENSG00000200834, exon 1 of 1)	full_rescue	NA
chr9-33751001-33752000	-83.5334	group_1	ENSG00000010438	PRSS3	Promoter (<=1kb)	no_rescue	CGI_and_GH
chr9-33420001-33421000	-45.625	group_4	ENSG00000165269	AQP7	Distal Intergenic	full_rescue	GH_only
chr9-33388001-33389000	-36.5524	group_2	ENSG00000165269	AQP7	Intron (ENST00000379507/ENSG00000165269, intron 1 of 5)	full_rescue	GH_only
chr9-33291001-33292000	-33.2331	group_1	ENSG00000086102	NFX1	Promoter (<=1kb)	partial_rescue	CGI_and_GH
chr9-33217001-33218000	-38.8889	group_4	ENSG00000122711	SPINK4	Promoter (<=1kb)	full_rescue	NA
chr9-33214001-33215000	-75	group_4	ENSG00000122711	SPINK4	Distal Intergenic	full_rescue	NA
chr9-33212001-33213000	-77.451	group_3	ENSG00000122711	SPINK4	Distal Intergenic	full_rescue	NA
chr9-33186001-33187000	-47.785	group_3	ENSG00000252224	RNU4ATAC15P	Distal Intergenic	full_rescue	GH_only
chr9-33185001-33186000	-81.8182	group_2	ENSG00000252224	RNU4ATAC15P	Distal Intergenic	partial_rescue	GH_only
chr9-33122001-33123000	-45	group_4	ENSG00000086062	B4GALT1	Intron (ENST00000535206/ENSG00000086062, intron 2 of 2)	full_rescue	GH_only
chr9-33092001-33093000	-25.2618	group_4	ENSG00000122692	SMU1	Distal Intergenic	full_rescue	NA
chr9-33052001-33053000	-28.2197	group_4	ENSG00000122692	SMU1	Intron (ENST00000397149/ENSG00000122692, intron 10 of 11)	full_rescue	NA
chr9-32956001-32957000	-40.5517	group_4	ENSG00000137074	APTX	Intron (ENST00000672846/ENSG00000137074, intron 9 of 10)	full_rescue	CGI_only
chr9-32784001-32785000	-29.8757	group_3	ENSG00000188133	TMEM215	Promoter (<=1kb)	full_rescue	CGI_only
chr9-32695001-32696000	-28.9157	group_4	ENSG00000238001	SNRPCP1	Distal Intergenic	partial_rescue	NA
chr9-32694001-32695000	-32.6087	group_4	ENSG00000238001	SNRPCP1	Distal Intergenic	full_rescue	NA
chr9-32686001-32687000	-50.3119	group_2	ENSG00000238001	SNRPCP1	Distal Intergenic	full_rescue	NA
chr9-32568001-32569000	-60.0694	group_4	ENSG00000165264	NDUFB6	3' UTR	full_rescue	CGI_and_GH
chr9-3182001-3183000	-31.1995	group_3	ENSG00000236511	LINC01231	Promoter (<=1kb)	full_rescue	CGI_only
chr9-3180001-3181000	-70.6141	group_3	ENSG00000236511	LINC01231	Promoter (<=1kb)	partial_rescue	CGI_only
chr9-31160001-31161000	-30.3478	group_3	ENSG00000223421	RP11-572H4.1	Distal Intergenic	partial_rescue	NA
chr9-31119001-31120000	-64.0927	group_3	ENSG00000223421	RP11-572H4.1	Distal Intergenic	full_rescue	NA
chr9-30002001-30003000	-35.7143	group_4	ENSG00000230097	ME2P1	Distal Intergenic	full_rescue	NA
chr9-28794001-28795000	-28.6637	group_4	ENSG00000215966	MIR876	Distal Intergenic	full_rescue	NA
chr9-27676001-27677000	-36.8029	group_4	ENSG00000215441	CTAGE12P	Distal Intergenic	full_rescue	NA
chr9-26755001-26756000	-35.2239	group_3	ENSG00000254261	RP11-18A15.1	Intron (ENST00000523363/ENSG00000254261, intron 3 of 3)	full_rescue	NA
chr9-26724001-26725000	-36.6224	group_4	ENSG00000254261	RP11-18A15.1	Distal Intergenic	full_rescue	NA
chr9-25690001-25691000	-46.4264	group_4	ENSG00000198680	TUSC1	Distal Intergenic	full_rescue	NA
chr9-22986001-22987000	-28.1886	group_3	ENSG00000284418	NA	Intron (ENST00000640003/ENSG00000284418, intron 3 of 9)	full_rescue	NA
chr9-22317001-22318000	-34.7746	group_4	ENSG00000236921	RP11-408N14.1	Distal Intergenic	full_rescue	NA
chr9-22095001-22096000	-32.6923	group_4	ENSG00000240498	CDKN2B-AS1	Intron (ENST00000585267/ENSG00000240498, intron 3 of 8)	full_rescue	NA
chr9-2186001-2187000	-76.9231	group_3	ENSG00000080503	SMARCA2	3' UTR	full_rescue	NA
chr9-21856001-21857000	-33.3333	group_4	ENSG00000099810	MTAP	Exon (ENST00000584988/ENSG00000099810, exon 1 of 3)	full_rescue	GH_only
chr9-21696001-21697000	-33.9829	group_4	ENSG00000229835	KHSRPP1	Promoter (<=1kb)	full_rescue	CGI_only
chr9-21652001-21653000	-25.56	group_4	ENSG00000227443	RP11-344A7.1	Distal Intergenic	full_rescue	NA
chr9-20721001-20722000	-85.7143	group_3	ENSG00000188352	FOCAD	Intron (ENST00000380249/ENSG00000188352, intron 6 of 45)	full_rescue	NA
chr9-2046001-2047000	-59.6154	group_2	ENSG00000236199	RP11-264I13.2	Promoter (<=1kb)	no_rescue	CGI_only
chr9-19652001-19653000	-36.3636	group_4	ENSG00000155886	SLC24A2	Intron (ENST00000341998/ENSG00000155886, intron 1 of 9)	full_rescue	NA
chr9-19542001-19543000	-36.4573	group_4	ENSG00000155886	SLC24A2	Intron (ENST00000341998/ENSG00000155886, intron 7 of 9)	full_rescue	NA
chr9-19488001-19489000	-70.5882	group_4	ENSG00000231909	MAP1LC3BP1	Distal Intergenic	full_rescue	NA
chr9-19463001-19464000	-100	group_3	ENSG00000231909	MAP1LC3BP1	Promoter (<=1kb)	full_rescue	NA
chr9-19103001-19104000	-28.5466	group_3	ENSG00000147874	HAUS6	Promoter (<=1kb)	full_rescue	CGI_and_GH
chr9-18809001-18810000	-30.7962	group_4	ENSG00000178031	ADAMTSL1	Intron (ENST00000680146/ENSG00000178031, intron 21 of 29)	full_rescue	NA
chr9-18807001-18808000	-32.1429	group_4	ENSG00000178031	ADAMTSL1	Intron (ENST00000680146/ENSG00000178031, intron 21 of 29)	full_rescue	NA
chr9-18491001-18492000	-33.0159	group_4	ENSG00000178031	ADAMTSL1	Intron (ENST00000680146/ENSG00000178031, intron 2 of 29)	full_rescue	GH_only
chr9-18191001-18192000	-38.4615	group_4	ENSG00000178031	ADAMTSL1	Intron (ENST00000680146/ENSG00000178031, intron 2 of 29)	full_rescue	NA
chr9-18176001-18177000	-36.8421	group_4	ENSG00000178031	ADAMTSL1	Intron (ENST00000680146/ENSG00000178031, intron 2 of 29)	partial_rescue	NA
chr9-18155001-18156000	-32	group_3	ENSG00000178031	ADAMTSL1	Intron (ENST00000680146/ENSG00000178031, intron 1 of 29)	no_rescue	NA
chr9-1737001-1738000	-27.2727	group_4	ENSG00000287465	NA	Distal Intergenic	full_rescue	NA
chr9-17318001-17319000	-34.2857	group_4	ENSG00000044459	CNTLN	Intron (ENST00000380647/ENSG00000044459, intron 8 of 25)	full_rescue	NA
chr9-17290001-17291000	-29.5381	group_3	ENSG00000044459	CNTLN	Intron (ENST00000380641/ENSG00000044459, intron 6 of 6)	full_rescue	NA
chr9-17164001-17165000	-38.5621	group_4	ENSG00000044459	CNTLN	Intron (ENST00000484374/ENSG00000044459, intron 2 of 2)	full_rescue	NA
chr9-17124001-17125000	-100	group_1	ENSG00000044459	CNTLN	Distal Intergenic	no_rescue	NA
chr9-17121001-17122000	-35.7182	group_3	ENSG00000237083	RP11-132E11.4	Distal Intergenic	full_rescue	NA
chr9-16730001-16731000	-35.1145	group_1	ENSG00000173068	BNC2	Intron (ENST00000380672/ENSG00000173068, intron 2 of 6)	full_rescue	GH_only
chr9-16515001-16516000	-50.913	group_1	ENSG00000173068	BNC2	Intron (ENST00000380672/ENSG00000173068, intron 5 of 6)	partial_rescue	NA
chr9-16311001-16312000	-41.5385	group_4	ENSG00000205549	C9orf92	Intron (ENST00000648575/ENSG00000205549, intron 2 of 3)	full_rescue	NA
chr9-16138001-16139000	-35.4167	group_4	ENSG00000205549	C9orf92	Distal Intergenic	full_rescue	NA
chr9-16104001-16105000	-39.0625	group_3	ENSG00000205549	C9orf92	Distal Intergenic	full_rescue	NA
chr9-16039001-16040000	-36.3736	group_3	ENSG00000164989	CCDC171	Intron (ENST00000486641/ENSG00000164989, intron 8 of 9)	full_rescue	GH_only
chr9-15818001-15819000	-27.5458	group_4	ENSG00000164989	CCDC171	Intron (ENST00000380701/ENSG00000164989, intron 21 of 25)	full_rescue	NA
chr9-15736001-15737000	-40.7407	group_4	ENSG00000164989	CCDC171	Intron (ENST00000380701/ENSG00000164989, intron 16 of 25)	full_rescue	NA
chr9-15723001-15724000	-45.8513	group_2	ENSG00000164989	CCDC171	Exon (ENST00000380701/ENSG00000164989, exon 13 of 26)	full_rescue	NA
chr9-15658001-15659000	-31.0345	group_4	ENSG00000164989	CCDC171	Intron (ENST00000380701/ENSG00000164989, intron 8 of 25)	full_rescue	NA
chr9-15648001-15649000	-39.4737	group_4	ENSG00000164989	CCDC171	Intron (ENST00000380701/ENSG00000164989, intron 7 of 25)	full_rescue	NA
chr9-15533001-15534000	-35.7143	group_1	ENSG00000213362	FTH1P12	Distal Intergenic	full_rescue	NA
chr9-15018001-15019000	-53.5714	group_3	ENSG00000215237	RP11-54D18.2	Intron (ENST00000502889/ENSG00000215237, intron 7 of 7)	partial_rescue	NA
chr9-14980001-14981000	-27.8689	group_4	ENSG00000232000	CLCN3P1	Intron (ENST00000652129/ENSG00000232000, intron 4 of 6)	full_rescue	CGI_only
chr9-14403001-14404000	-33.5714	group_3	ENSG00000287708	NA	Intron (ENST00000659981/ENSG00000287708, intron 2 of 3)	full_rescue	GH_only
chr9-1406001-1407000	-42.4242	group_4	ENSG00000202383	RNA5SP279	Distal Intergenic	full_rescue	NA
chr9-140001-141000	-46.7045	group_1	ENSG00000172785	CBWD1	Intron (ENST00000356521/ENSG00000172785, intron 10 of 14)	partial_rescue	NA
chr9-139001-140000	-68.4267	group_2	ENSG00000172785	CBWD1	Intron (ENST00000356521/ENSG00000172785, intron 10 of 14)	partial_rescue	NA
chr9-138216001-138217000	-66.6667	group_1	ENSG00000233013	FAM157B	Promoter (<=1kb)	full_rescue	NA
chr9-138201001-138202000	-28.5242	group_3	ENSG00000237419	RP11-885N19.6	Intron (ENST00000428088/ENSG00000237419, intron 1 of 1)	full_rescue	NA
chr9-138200001-138201000	-32.1358	group_4	ENSG00000237419	RP11-885N19.6	Exon (ENST00000428088/ENSG00000237419, exon 2 of 2)	full_rescue	NA
chr9-138178001-138179000	-43.3816	group_3	ENSG00000278130	RP11-424E7.6	Promoter (<=1kb)	full_rescue	NA
chr9-138177001-138178000	-25.7434	group_3	ENSG00000159247	TUBBP5	Exon (ENST00000290377/ENSG00000159247, exon 4 of 4)	full_rescue	CGI_only
chr9-138159001-138160000	-42.6094	group_3	ENSG00000159247	TUBBP5	Intron (ENST00000635438/ENSG00000159247, intron 1 of 1)	full_rescue	NA
chr9-138150001-138151000	-44.4454	group_3	ENSG00000159247	TUBBP5	Promoter (<=1kb)	full_rescue	CGI_only
chr9-138144001-138145000	-33.8066	group_3	ENSG00000159247	TUBBP5	Distal Intergenic	full_rescue	NA
chr9-138142001-138143000	-36.753	group_3	ENSG00000229926	RP11-424E7.3	Intron (ENST00000442569/ENSG00000229926, intron 7 of 7)	full_rescue	NA
chr9-138137001-138138000	-25.2247	group_4	ENSG00000229926	RP11-424E7.3	Promoter (<=1kb)	full_rescue	NA
chr9-138127001-138128000	-30.7289	group_4	ENSG00000276388	RP11-424E7.5	Promoter (1-2kb)	full_rescue	NA
chr9-138126001-138127000	-55.6667	group_3	ENSG00000276388	RP11-424E7.5	Distal Intergenic	full_rescue	NA
chr9-137968001-137969000	-26.4227	group_4	ENSG00000148408	CACNA1B	Intron (ENST00000371372/ENSG00000148408, intron 10 of 46)	full_rescue	NA
chr9-137960001-137961000	-62.6859	group_1	ENSG00000148408	CACNA1B	Intron (ENST00000371372/ENSG00000148408, intron 10 of 46)	no_rescue	NA
chr9-137959001-137960000	-50.3224	group_2	ENSG00000148408	CACNA1B	Intron (ENST00000371372/ENSG00000148408, intron 10 of 46)	no_rescue	NA
chr9-137945001-137946000	-32.5135	group_3	ENSG00000148408	CACNA1B	Intron (ENST00000371372/ENSG00000148408, intron 6 of 46)	full_rescue	NA
chr9-137788001-137789000	-31.5953	group_4	ENSG00000181090	EHMT1	5' UTR	full_rescue	CGI_only
chr9-13771001-13772000	-42.381	group_4	ENSG00000226197	RP11-536O18.1	Intron (ENST00000664438/ENSG00000226197, intron 2 of 2)	full_rescue	NA
chr9-137667001-137668000	-27.6521	group_1	ENSG00000181090	EHMT1	5' UTR	partial_rescue	GH_only
chr9-137645001-137646000	-73.5294	group_3	ENSG00000181090	EHMT1	Intron (ENST00000637510/ENSG00000283411, intron 1 of 1)	full_rescue	GH_only
chr9-137579001-137580000	-30.4864	group_1	ENSG00000148399	DPH7	Promoter (<=1kb)	full_rescue	CGI_and_GH
chr9-137461001-137462000	-27.6097	group_2	ENSG00000130653	PNPLA7	Exon (ENST00000406427/ENSG00000130653, exon 32 of 35)	full_rescue	CGI_only
chr9-137458001-137459000	-34.3181	group_1	ENSG00000165802	NSMF	Promoter (<=1kb)	partial_rescue	CGI_only
chr9-137424001-137425000	-33.3218	group_4	ENSG00000188747	NOXA1	Promoter (<=1kb)	full_rescue	CGI_and_GH
chr9-137417001-137418000	-76.3468	group_4	ENSG00000187609	EXD3	Intron (ENST00000340951/ENSG00000187609, intron 1 of 21)	full_rescue	CGI_only
chr9-137416001-137417000	-43.4201	group_4	ENSG00000187609	EXD3	Intron (ENST00000340951/ENSG00000187609, intron 1 of 21)	full_rescue	CGI_only
chr9-137380001-137381000	-25.4659	group_4	ENSG00000187609	EXD3	Intron (ENST00000340951/ENSG00000187609, intron 3 of 21)	full_rescue	CGI_only
chr9-137371001-137372000	-28.2624	group_4	ENSG00000187609	EXD3	Intron (ENST00000340951/ENSG00000187609, intron 5 of 21)	full_rescue	CGI_only
chr9-137321001-137322000	-29.4901	group_3	ENSG00000187609	EXD3	Intron (ENST00000491734/ENSG00000187609, intron 13 of 14)	full_rescue	CGI_and_GH
chr9-137320001-137321000	-31.0488	group_3	ENSG00000187609	EXD3	Intron (ENST00000491734/ENSG00000187609, intron 13 of 14)	partial_rescue	CGI_and_GH
chr9-137298001-137299000	-31.496	group_1	ENSG00000288234	NA	Exon (ENST00000673408/ENSG00000288234, exon 3 of 4)	full_rescue	CGI_and_GH
chr9-137294001-137295000	-46.4565	group_2	ENSG00000288234	NA	Promoter (<=1kb)	full_rescue	CGI_and_GH
chr9-137288001-137289000	-100	group_4	ENSG00000270259	RP13-122B23.9	Distal Intergenic	full_rescue	NA
chr9-137278001-137279000	-64.1793	group_2	ENSG00000198113	TOR4A	Promoter (<=1kb)	no_rescue	CGI_and_GH
chr9-137277001-137278000	-36.1388	group_1	ENSG00000198113	TOR4A	Promoter (<=1kb)	no_rescue	CGI_and_GH
chr9-137276001-137277000	-28.4208	group_3	ENSG00000198113	TOR4A	Promoter (<=1kb)	full_rescue	CGI_and_GH
chr9-137244001-137245000	-36.9246	group_2	ENSG00000188163	FAM166A	Exon (ENST00000471784/ENSG00000188163, exon 5 of 6)	full_rescue	CGI_and_GH
chr9-137235001-137236000	-25.6123	group_4	ENSG00000198569	SLC34A3	Exon (ENST00000538474/ENSG00000198569, exon 13 of 13)	full_rescue	CGI_and_GH
chr9-137217001-137218000	-38.9963	group_2	ENSG00000284976	NA	Promoter (<=1kb)	full_rescue	CGI_and_GH
chr9-137175001-137176000	-66.355	group_2	ENSG00000176248	ANAPC2	Exon (ENST00000487917/ENSG00000176248, exon 1 of 3)	no_rescue	CGI_and_GH
chr9-137161001-137162000	-57.6162	group_2	ENSG00000176884	GRIN1	3' UTR	full_rescue	CGI_and_GH
chr9-137160001-137161000	-42.9714	group_3	ENSG00000176884	GRIN1	Intron (ENST00000371561/ENSG00000176884, intron 8 of 19)	full_rescue	CGI_and_GH
chr9-137159001-137160000	-42.9245	group_2	ENSG00000176884	GRIN1	Exon (ENST00000676396/ENSG00000176884, exon 4 of 4)	partial_rescue	CGI_and_GH
chr9-137158001-137159000	-29.3825	group_4	ENSG00000176884	GRIN1	3' UTR	full_rescue	CGI_and_GH
chr9-137157001-137158000	-43.0615	group_2	ENSG00000176884	GRIN1	Exon (ENST00000371561/ENSG00000176884, exon 6 of 20)	no_rescue	CGI_and_GH
chr9-137156001-137157000	-59.1119	group_1	ENSG00000176884	GRIN1	Exon (ENST00000371561/ENSG00000176884, exon 5 of 20)	no_rescue	CGI_only
chr9-137151001-137152000	-38.6634	group_2	ENSG00000176884	GRIN1	Intron (ENST00000371561/ENSG00000176884, intron 4 of 19)	full_rescue	GH_only
chr9-137150001-137151000	-54.518	group_3	ENSG00000176884	GRIN1	Exon (ENST00000675064/ENSG00000176884, exon 3 of 3)	full_rescue	CGI_and_GH
chr9-137146001-137147000	-45.7474	group_3	ENSG00000176884	GRIN1	Intron (ENST00000371561/ENSG00000176884, intron 3 of 19)	full_rescue	CGI_and_GH
chr9-137143001-137144000	-25.6098	group_3	ENSG00000176884	GRIN1	Intron (ENST00000371561/ENSG00000176884, intron 2 of 19)	full_rescue	CGI_only
chr9-137137001-137138000	-34.1739	group_3	ENSG00000176884	GRIN1	Promoter (1-2kb)	full_rescue	CGI_only
chr9-137136001-137137000	-49.1505	group_2	ENSG00000176884	GRIN1	Distal Intergenic	partial_rescue	CGI_only
chr9-137115001-137116000	-33.006	group_3	ENSG00000176978	DPP7	Promoter (<=1kb)	full_rescue	CGI_and_GH
chr9-137079001-137080000	-32.8361	group_1	ENSG00000197355	UAP1L1	3' UTR	partial_rescue	CGI_and_GH
chr9-137076001-137077000	-28.5784	group_3	ENSG00000197355	UAP1L1	Promoter (<=1kb)	partial_rescue	CGI_and_GH
chr9-137054001-137055000	-29.5598	group_1	ENSG00000054179	ENTPD2	Promoter (<=1kb)	full_rescue	CGI_and_GH
chr9-137049001-137050000	-34.5628	group_2	ENSG00000054179	ENTPD2	Exon (ENST00000460614/ENSG00000054179, exon 1 of 2)	full_rescue	CGI_and_GH
chr9-137034001-137035000	-31.3908	group_4	ENSG00000180539	C9orf139	Exon (ENST00000623196/ENSG00000180539, exon 3 of 3)	full_rescue	GH_only
chr9-137013001-137014000	-55.4299	group_3	ENSG00000107331	ABCA2	3' UTR	partial_rescue	CGI_only
chr9-136984001-136985000	-36.366	group_2	ENSG00000214402	LCNL1	3' UTR	no_rescue	CGI_only
chr9-136966001-136967000	-35.6073	group_2	ENSG00000198454	PRR31	Distal Intergenic	partial_rescue	GH_only
chr9-136881001-136882000	-31.8756	group_2	ENSG00000127191	TRAF2	Promoter (<=1kb)	full_rescue	GH_only
chr9-136846001-136847000	-77.4991	group_2	ENSG00000232434	C9orf172	Exon (ENST00000436881/ENSG00000232434, exon 1 of 1)	no_rescue	CGI_and_GH
chr9-136845001-136846000	-78.7591	group_3	ENSG00000232434	C9orf172	Promoter (<=1kb)	no_rescue	CGI_and_GH
chr9-136773001-136774000	-25.4012	group_3	ENSG00000224662	ATP6V1G1P3	Distal Intergenic	full_rescue	GH_only
chr9-136758001-136759000	-25.5178	group_3	ENSG00000204001	LCN8	Promoter (<=1kb)	full_rescue	CGI_and_GH
chr9-136742001-136743000	-42.0333	group_3	ENSG00000187922	LCN10	Promoter (<=1kb)	full_rescue	NA
chr9-136701001-136702000	-61.8123	group_2	ENSG00000165716	FAM69B	Distal Intergenic	no_rescue	CGI_and_GH
chr9-136671001-136672000	-38.7774	group_2	ENSG00000172889	EGFL7	Exon (ENST00000371699/ENSG00000172889, exon 8 of 10)	partial_rescue	CGI_and_GH
chr9-136659001-136660000	-32.7197	group_4	ENSG00000172889	EGFL7	Promoter (<=1kb)	full_rescue	CGI_and_GH
chr9-136602001-136603000	-25.3684	group_3	ENSG00000279141	LINC01451	Distal Intergenic	full_rescue	NA
chr9-136568001-136569000	-39.5422	group_1	ENSG00000265181	MIR4674	Distal Intergenic	no_rescue	GH_only
chr9-136551001-136552000	-35.9787	group_1	ENSG00000265181	MIR4674	Distal Intergenic	no_rescue	GH_only
chr9-136530001-136531000	-42.2962	group_3	ENSG00000148400	NOTCH1	Intron (ENST00000651671/ENSG00000148400, intron 2 of 33)	full_rescue	CGI_and_GH
chr9-136481001-136482000	-26	group_4	ENSG00000148396	SEC16A	Intron (ENST00000290037/ENSG00000148396, intron 1 of 28)	full_rescue	CGI_and_GH
chr9-136364001-136365000	-77.2337	group_2	ENSG00000187796	CARD9	3' UTR	no_rescue	CGI_and_GH
chr9-136346001-136347000	-31.4646	group_3	ENSG00000160360	GPSM1	Intron (ENST00000440944/ENSG00000160360, intron 9 of 13)	full_rescue	CGI_and_GH
chr9-136342001-136343000	-33.312	group_1	ENSG00000160360	GPSM1	Intron (ENST00000440944/ENSG00000160360, intron 9 of 13)	no_rescue	CGI_and_GH
chr9-136283001-136284000	-34.4442	group_3	ENSG00000260220	CCDC187	Intron (ENST00000638797/ENSG00000260220, intron 9 of 25)	full_rescue	NA
chr9-136268001-136269000	-35.0026	group_2	ENSG00000260220	CCDC187	Exon (ENST00000638797/ENSG00000260220, exon 15 of 26)	no_rescue	CGI_only
chr9-136201001-136202000	-47.4642	group_1	ENSG00000107187	LHX3	5' UTR	full_rescue	CGI_only
chr9-136200001-136201000	-76.7382	group_2	ENSG00000107187	LHX3	Exon (ENST00000371746/ENSG00000107187, exon 2 of 6)	no_rescue	CGI_only
chr9-136197001-136198000	-52.3354	group_1	ENSG00000107187	LHX3	3' UTR	full_rescue	CGI_only
chr9-136195001-136196000	-49.8039	group_2	ENSG00000107187	LHX3	Downstream (<1kb)	no_rescue	CGI_only
chr9-136191001-136192000	-43.8344	group_2	ENSG00000107187	LHX3	Distal Intergenic	partial_rescue	CGI_only
chr9-136165001-136166000	-41.0833	group_4	ENSG00000107187	LHX3	Distal Intergenic	full_rescue	NA
chr9-136148001-136149000	-35.3008	group_2	ENSG00000275329	RP11-83N9.6	Distal Intergenic	partial_rescue	NA
chr9-136143001-136144000	-52.4514	group_1	ENSG00000275329	RP11-83N9.6	Distal Intergenic	no_rescue	NA
chr9-136134001-136135000	-36.0624	group_2	ENSG00000275329	RP11-83N9.6	Distal Intergenic	full_rescue	CGI_only
chr9-136133001-136134000	-29.7365	group_1	ENSG00000275329	RP11-83N9.6	Distal Intergenic	partial_rescue	CGI_only
chr9-136132001-136133000	-48.1906	group_2	ENSG00000275329	RP11-83N9.6	Distal Intergenic	full_rescue	CGI_only
chr9-136123001-136124000	-31.3545	group_1	ENSG00000275329	RP11-83N9.6	Promoter (<=1kb)	partial_rescue	CGI_and_GH
chr9-136104001-136105000	-35.8489	group_2	ENSG00000260193	RP11-83N9.5	Downstream (2-3kb)	partial_rescue	GH_only
chr9-136090001-136091000	-30.0596	group_3	ENSG00000148411	NACC2	Intron (ENST00000277554/ENSG00000148411, intron 1 of 5)	partial_rescue	GH_only
chr9-136057001-136058000	-31.5825	group_3	ENSG00000148411	NACC2	Intron (ENST00000277554/ENSG00000148411, intron 1 of 5)	full_rescue	GH_only
chr9-136053001-136054000	-35.736	group_2	ENSG00000148411	NACC2	Intron (ENST00000277554/ENSG00000148411, intron 1 of 5)	full_rescue	CGI_only
chr9-136005001-136006000	-44.0476	group_2	ENSG00000130560	UBAC1	Downstream (<1kb)	partial_rescue	GH_only
chr9-135993001-135994000	-30.8304	group_3	ENSG00000130560	UBAC1	Distal Intergenic	full_rescue	NA
chr9-135990001-135991000	-39.5381	group_3	ENSG00000130560	UBAC1	Distal Intergenic	partial_rescue	CGI_only
chr9-135977001-135978000	-32.3763	group_3	ENSG00000130560	UBAC1	Distal Intergenic	full_rescue	GH_only
chr9-135971001-135972000	-31.9506	group_3	ENSG00000130560	UBAC1	Distal Intergenic	full_rescue	NA
chr9-135736001-135737000	-84.6611	group_1	ENSG00000107147	KCNT1	5' UTR	full_rescue	CGI_only
chr9-135624001-135625000	-49.7619	group_4	ENSG00000204007	GLT6D1	3' UTR	full_rescue	NA
chr9-135602001-135603000	-31.337	group_3	ENSG00000236543	RP11-98L5.5	Promoter (1-2kb)	full_rescue	NA
chr9-135600001-135601000	-56.1684	group_2	ENSG00000236543	RP11-98L5.5	Distal Intergenic	full_rescue	NA
chr9-135526001-135527000	-29.8674	group_2	ENSG00000160349	LCN1	3' UTR	no_rescue	NA
chr9-135491001-135492000	-35.4464	group_4	ENSG00000122140	MRPS2	Distal Intergenic	full_rescue	NA
chr9-135440001-135441000	-27.3649	group_4	ENSG00000224682	SOCS5P2	Distal Intergenic	full_rescue	NA
chr9-135294001-135295000	-38.4615	group_4	ENSG00000233936	RP11-399H11.2	Distal Intergenic	full_rescue	NA
chr9-135253001-135254000	-38.0164	group_3	ENSG00000233936	RP11-399H11.2	Promoter (<=1kb)	partial_rescue	CGI_only
chr9-135206001-135207000	-25.8065	group_4	ENSG00000227958	RP11-399H11.3	Intron (ENST00000452377/ENSG00000227958, intron 1 of 1)	full_rescue	NA
chr9-135098001-135099000	-26.8509	group_4	ENSG00000130558	OLFM1	3' UTR	full_rescue	NA
chr9-135070001-135071000	-44.903	group_3	ENSG00000130558	OLFM1	Distal Intergenic	partial_rescue	NA
chr9-135063001-135064000	-33.5489	group_3	ENSG00000130558	OLFM1	Distal Intergenic	full_rescue	NA
chr9-135030001-135031000	-30.0269	group_3	ENSG00000279935	RP11-447M12.3	Distal Intergenic	full_rescue	NA
chr9-134779001-134780000	-37.753	group_2	ENSG00000130635	COL5A1	Intron (ENST00000371817/ENSG00000130635, intron 27 of 65)	partial_rescue	GH_only
chr9-134609001-134610000	-42.8571	group_4	ENSG00000130635	COL5A1	Distal Intergenic	full_rescue	NA
chr9-134501001-134502000	-76.9615	group_1	ENSG00000223795	RP11-473E2.2	Distal Intergenic	no_rescue	CGI_only
chr9-134438001-134439000	-47.5228	group_3	ENSG00000186350	RXRA	3' UTR	partial_rescue	CGI_and_GH
chr9-134407001-134408000	-41.8655	group_3	ENSG00000186350	RXRA	Intron (ENST00000481739/ENSG00000186350, intron 2 of 9)	partial_rescue	CGI_and_GH
chr9-134394001-134395000	-25.0899	group_4	ENSG00000186350	RXRA	Intron (ENST00000484822/ENSG00000186350, intron 2 of 2)	full_rescue	GH_only
chr9-134329001-134330000	-33.2451	group_3	ENSG00000186350	RXRA	Intron (ENST00000484822/ENSG00000186350, intron 2 of 2)	no_rescue	CGI_and_GH
chr9-134321001-134322000	-49.4313	group_2	ENSG00000186350	RXRA	Intron (ENST00000484822/ENSG00000186350, intron 2 of 2)	full_rescue	GH_only
chr9-134319001-134320000	-27.3781	group_4	ENSG00000186350	RXRA	Exon (ENST00000484822/ENSG00000186350, exon 2 of 3)	full_rescue	GH_only
chr9-134272001-134273000	-32.6735	group_3	ENSG00000223729	RP11-145E17.2	Distal Intergenic	full_rescue	NA
chr9-134263001-134264000	-30.4264	group_2	ENSG00000223729	RP11-145E17.2	Distal Intergenic	partial_rescue	NA
chr9-134216001-134217000	-33.831	group_4	ENSG00000273473	LL09NC01-139C3.1	Distal Intergenic	full_rescue	NA
chr9-134189001-134190000	-56.4122	group_2	ENSG00000273473	LL09NC01-139C3.1	Distal Intergenic	no_rescue	NA
chr9-134187001-134188000	-35.2886	group_4	ENSG00000273473	LL09NC01-139C3.1	Distal Intergenic	full_rescue	NA
chr9-134099001-134100000	-34.2425	group_3	ENSG00000271525	ARF4P1	Distal Intergenic	full_rescue	NA
chr9-134098001-134099000	-30.303	group_4	ENSG00000271525	ARF4P1	Distal Intergenic	full_rescue	NA
chr9-133999001-134000000	-38.0952	group_4	ENSG00000160293	VAV2	Distal Intergenic	full_rescue	NA
chr9-133995001-133996000	-28.4351	group_4	ENSG00000160293	VAV2	Distal Intergenic	full_rescue	CGI_and_GH
chr9-133890001-133891000	-28.2609	group_4	ENSG00000160293	VAV2	Intron (ENST00000406606/ENSG00000160293, intron 2 of 26)	full_rescue	GH_only
chr9-133869001-133870000	-28.8043	group_4	ENSG00000160293	VAV2	Intron (ENST00000406606/ENSG00000160293, intron 2 of 26)	full_rescue	GH_only
chr9-133861001-133862000	-50.6445	group_3	ENSG00000160293	VAV2	Exon (ENST00000406606/ENSG00000160293, exon 3 of 27)	no_rescue	CGI_only
chr9-133840001-133841000	-35.7209	group_3	ENSG00000160293	VAV2	Intron (ENST00000406606/ENSG00000160293, intron 3 of 26)	full_rescue	NA
chr9-133836001-133837000	-59.015	group_3	ENSG00000160293	VAV2	Intron (ENST00000406606/ENSG00000160293, intron 3 of 26)	partial_rescue	NA
chr9-133835001-133836000	-55.0595	group_3	ENSG00000160293	VAV2	Intron (ENST00000406606/ENSG00000160293, intron 3 of 26)	no_rescue	NA
chr9-133732001-133733000	-37.9391	group_3	ENSG00000123453	SARDH	Exon (ENST00000439388/ENSG00000123453, exon 3 of 21)	full_rescue	NA
chr9-133730001-133731000	-27.8359	group_4	ENSG00000123453	SARDH	5' UTR	full_rescue	NA
chr9-133729001-133730000	-28.0181	group_4	ENSG00000123453	SARDH	5' UTR	full_rescue	NA
chr9-133726001-133727000	-37.2549	group_3	ENSG00000123453	SARDH	Intron (ENST00000439388/ENSG00000123453, intron 6 of 20)	full_rescue	NA
chr9-133715001-133716000	-26.3754	group_4	ENSG00000123453	SARDH	Intron (ENST00000439388/ENSG00000123453, intron 8 of 20)	full_rescue	GH_only
chr9-133703001-133704000	-32.0628	group_3	ENSG00000123453	SARDH	5' UTR	partial_rescue	CGI_and_GH
chr9-133702001-133703000	-43.343	group_3	ENSG00000123453	SARDH	5' UTR	partial_rescue	CGI_and_GH
chr9-133659001-133660000	-27.2177	group_3	ENSG00000123454	DBH	3' UTR	full_rescue	NA
chr9-133638001-133639000	-55.339	group_2	ENSG00000123454	DBH	Intron (ENST00000393056/ENSG00000123454, intron 1 of 11)	no_rescue	NA
chr9-133585001-133586000	-29.7806	group_2	ENSG00000196990	FAM163B	5' UTR	no_rescue	CGI_only
chr9-133584001-133585000	-35.5327	group_2	ENSG00000196990	FAM163B	Intron (ENST00000496132/ENSG00000196990, intron 1 of 2)	no_rescue	CGI_only
chr9-133579001-133580000	-25.7159	group_4	ENSG00000196990	FAM163B	3' UTR	full_rescue	CGI_only
chr9-133550001-133551000	-30.7978	group_4	ENSG00000197859	ADAMTSL2	Intron (ENST00000354484/ENSG00000197859, intron 9 of 18)	full_rescue	NA
chr9-133528001-133529000	-34.0351	group_3	ENSG00000187616	TMEM8C	Promoter (<=1kb)	no_rescue	GH_only
chr9-133526001-133527000	-29.8416	group_2	ENSG00000187616	TMEM8C	Intron (ENST00000413714/ENSG00000187616, intron 1 of 3)	no_rescue	GH_only
chr9-133470001-133471000	-36.8706	group_3	ENSG00000160325	CACFD1	3' UTR	full_rescue	NA
chr9-133378001-133379000	-42.6353	group_3	ENSG00000198870	STKLD1	Intron (ENST00000371957/ENSG00000198870, intron 1 of 17)	full_rescue	CGI_and_GH
chr9-133259001-133260000	-59.2838	group_3	ENSG00000175164	ABO	Exon (ENST00000453660/ENSG00000175164, exon 4 of 7)	full_rescue	NA
chr9-133249001-133250000	-33.3333	group_4	ENSG00000119440	LCN1P1	Exon (ENST00000680600/ENSG00000175164, exon 2 of 2)	full_rescue	GH_only
chr9-133217001-133218000	-35.7251	group_2	ENSG00000171102	OBP2B	Distal Intergenic	full_rescue	NA
chr9-133210001-133211000	-27.9988	group_4	ENSG00000171102	OBP2B	Promoter (<=1kb)	full_rescue	NA
chr9-133208001-133209000	-42.9505	group_3	ENSG00000171102	OBP2B	Promoter (<=1kb)	full_rescue	NA
chr9-133207001-133208000	-32.5308	group_4	ENSG00000171102	OBP2B	Exon (ENST00000372034/ENSG00000171102, exon 4 of 7)	full_rescue	NA
chr9-133200001-133201000	-31.8541	group_4	ENSG00000171102	OBP2B	Distal Intergenic	full_rescue	CGI_only
chr9-133188001-133189000	-25.7245	group_2	ENSG00000171102	OBP2B	Distal Intergenic	full_rescue	NA
chr9-133169001-133170000	-36.3005	group_4	ENSG00000148288	GBGT1	Distal Intergenic	full_rescue	NA
chr9-133163001-133164000	-42.0666	group_1	ENSG00000148288	GBGT1	Promoter (<=1kb)	no_rescue	CGI_and_GH
chr9-133162001-133163000	-30.7989	group_4	ENSG00000148288	GBGT1	Promoter (<=1kb)	full_rescue	CGI_and_GH
chr9-133133001-133134000	-27.2043	group_3	ENSG00000160271	RALGDS	Intron (ENST00000393160/ENSG00000160271, intron 1 of 17)	full_rescue	GH_only
chr9-133014001-133015000	-64.3357	group_3	ENSG00000196205	EEF1A1P5	Distal Intergenic	full_rescue	NA
chr9-133004001-133005000	-35.7948	group_2	ENSG00000196205	EEF1A1P5	Distal Intergenic	partial_rescue	NA
chr9-133003001-133004000	-35.7499	group_2	ENSG00000196205	EEF1A1P5	Distal Intergenic	full_rescue	NA
chr9-133002001-133003000	-38.5507	group_3	ENSG00000196205	EEF1A1P5	Distal Intergenic	full_rescue	NA
chr9-132994001-132995000	-39.0236	group_2	ENSG00000196205	EEF1A1P5	Distal Intergenic	no_rescue	NA
chr9-132979001-132980000	-44.78	group_3	ENSG00000165702	GFI1B	Intron (ENST00000339463/ENSG00000165702, intron 5 of 10)	partial_rescue	GH_only
chr9-132978001-132979000	-31.6977	group_1	ENSG00000165702	GFI1B	5' UTR	no_rescue	GH_only
chr9-132879001-132880000	-41.5631	group_2	ENSG00000165698	SPACA9	Promoter (<=1kb)	partial_rescue	CGI_and_GH
chr9-132799001-132800000	-28.6535	group_4	ENSG00000165695	AK8	Intron (ENST00000298545/ENSG00000165695, intron 10 of 12)	full_rescue	GH_only
chr9-132795001-132796000	-57.1726	group_2	ENSG00000165695	AK8	Intron (ENST00000298545/ENSG00000165695, intron 10 of 12)	partial_rescue	NA
chr9-132794001-132795000	-51.3518	group_3	ENSG00000165695	AK8	Intron (ENST00000298545/ENSG00000165695, intron 10 of 12)	full_rescue	NA
chr9-132793001-132794000	-43.8725	group_3	ENSG00000165695	AK8	Intron (ENST00000298545/ENSG00000165695, intron 10 of 12)	full_rescue	NA
chr9-132748001-132749000	-31.0365	group_4	ENSG00000165695	AK8	Intron (ENST00000298545/ENSG00000165695, intron 11 of 12)	full_rescue	NA
chr9-132743001-132744000	-56.2362	group_1	ENSG00000165695	AK8	Intron (ENST00000298545/ENSG00000165695, intron 11 of 12)	full_rescue	NA
chr9-132732001-132733000	-35.6965	group_4	ENSG00000165695	AK8	Intron (ENST00000298545/ENSG00000165695, intron 11 of 12)	full_rescue	NA
chr9-132623001-132624000	-38.8889	group_4	ENSG00000125485	DDX31	Intron (ENST00000372159/ENSG00000125485, intron 17 of 19)	full_rescue	NA
chr9-132578001-132579000	-38.1644	group_3	ENSG00000125492	BARHL1	Distal Intergenic	partial_rescue	CGI_only
chr9-132562001-132563000	-46.2406	group_4	ENSG00000188523	CFAP77	Intron (ENST00000393216/ENSG00000188523, intron 5 of 5)	full_rescue	NA
chr9-132561001-132562000	-25.662	group_4	ENSG00000188523	CFAP77	Intron (ENST00000393216/ENSG00000188523, intron 5 of 5)	full_rescue	NA
chr9-132531001-132532000	-40.8075	group_2	ENSG00000188523	CFAP77	Intron (ENST00000393216/ENSG00000188523, intron 3 of 5)	partial_rescue	NA
chr9-132514001-132515000	-27.5186	group_4	ENSG00000188523	CFAP77	Intron (ENST00000393216/ENSG00000188523, intron 3 of 5)	full_rescue	NA
chr9-132460001-132461000	-34.6154	group_4	ENSG00000188523	CFAP77	Intron (ENST00000393215/ENSG00000188523, intron 1 of 3)	full_rescue	NA
chr9-132424001-132425000	-31.5327	group_2	ENSG00000188523	CFAP77	Intron (ENST00000393215/ENSG00000188523, intron 1 of 3)	partial_rescue	NA
chr9-132415001-132416000	-45.6601	group_2	ENSG00000188523	CFAP77	Intron (ENST00000393215/ENSG00000188523, intron 1 of 3)	no_rescue	NA
chr9-132259001-132260000	-26.3604	group_2	ENSG00000107290	SETX	Downstream (1-2kb)	full_rescue	GH_only
chr9-132246001-132247000	-36.5047	group_2	ENSG00000196358	NTNG2	Distal Intergenic	partial_rescue	GH_only
chr9-132214001-132215000	-44.2066	group_1	ENSG00000196358	NTNG2	Intron (ENST00000372179/ENSG00000196358, intron 4 of 6)	partial_rescue	GH_only
chr9-132202001-132203000	-36.8421	group_3	ENSG00000196358	NTNG2	Intron (ENST00000372179/ENSG00000196358, intron 4 of 6)	partial_rescue	NA
chr9-132188001-132189000	-65.2044	group_2	ENSG00000196358	NTNG2	Intron (ENST00000372179/ENSG00000196358, intron 3 of 6)	no_rescue	NA
chr9-132187001-132188000	-41.5067	group_1	ENSG00000196358	NTNG2	Intron (ENST00000372179/ENSG00000196358, intron 3 of 6)	no_rescue	NA
chr9-132186001-132187000	-83.6161	group_2	ENSG00000196358	NTNG2	Intron (ENST00000372179/ENSG00000196358, intron 3 of 6)	no_rescue	NA
chr9-132185001-132186000	-43.9814	group_1	ENSG00000196358	NTNG2	Intron (ENST00000372179/ENSG00000196358, intron 3 of 6)	no_rescue	NA
chr9-132184001-132185000	-30.8732	group_2	ENSG00000196358	NTNG2	Intron (ENST00000372179/ENSG00000196358, intron 3 of 6)	partial_rescue	NA
chr9-132183001-132184000	-44.5068	group_2	ENSG00000196358	NTNG2	Intron (ENST00000372179/ENSG00000196358, intron 3 of 6)	no_rescue	NA
chr9-132166001-132167000	-26.6512	group_2	ENSG00000196358	NTNG2	5' UTR	partial_rescue	CGI_only
chr9-132160001-132161000	-31.0794	group_2	ENSG00000196358	NTNG2	Promoter (<=1kb)	full_rescue	CGI_and_GH
chr9-132157001-132158000	-32.122	group_4	ENSG00000196358	NTNG2	Distal Intergenic	full_rescue	NA
chr9-132154001-132155000	-25.0428	group_3	ENSG00000196358	NTNG2	Distal Intergenic	full_rescue	NA
chr9-132136001-132137000	-25.2005	group_3	ENSG00000196358	NTNG2	Distal Intergenic	full_rescue	NA
chr9-132055001-132056000	-27.0833	group_3	ENSG00000160563	MED27	Intron (ENST00000651950/ENSG00000160563, intron 2 of 8)	full_rescue	NA
chr9-131900001-131901000	-37.8788	group_3	ENSG00000160563	MED27	Intron (ENST00000651950/ENSG00000160563, intron 4 of 8)	full_rescue	NA
chr9-131889001-131890000	-29.4872	group_3	ENSG00000160563	MED27	Intron (ENST00000651950/ENSG00000160563, intron 5 of 8)	full_rescue	GH_only
chr9-131856001-131857000	-32.3529	group_3	ENSG00000160563	MED27	Intron (ENST00000651950/ENSG00000160563, intron 7 of 8)	full_rescue	NA
chr9-131855001-131856000	-38.149	group_3	ENSG00000160563	MED27	Intron (ENST00000651950/ENSG00000160563, intron 7 of 8)	partial_rescue	NA
chr9-131786001-131787000	-33.9623	group_4	ENSG00000212395	SNORA67	Distal Intergenic	partial_rescue	NA
chr9-131775001-131776000	-45.0704	group_4	ENSG00000231018	EIF4A1P3	Distal Intergenic	partial_rescue	NA
chr9-131733001-131734000	-66.6667	group_3	ENSG00000107263	RAPGEF1	Intron (ENST00000372189/ENSG00000107263, intron 1 of 23)	partial_rescue	GH_only
chr9-131677001-131678000	-30.4822	group_3	ENSG00000107263	RAPGEF1	Intron (ENST00000372189/ENSG00000107263, intron 1 of 23)	full_rescue	GH_only
chr9-131645001-131646000	-29.7297	group_4	ENSG00000107263	RAPGEF1	Intron (ENST00000372189/ENSG00000107263, intron 3 of 23)	full_rescue	GH_only
chr9-131609001-131610000	-64.55	group_3	ENSG00000107263	RAPGEF1	Intron (ENST00000372189/ENSG00000107263, intron 11 of 23)	full_rescue	GH_only
chr9-131608001-131609000	-37.7371	group_2	ENSG00000107263	RAPGEF1	Intron (ENST00000372189/ENSG00000107263, intron 11 of 23)	partial_rescue	GH_only
chr9-131546001-131547000	-73.8358	group_1	ENSG00000283526	RP11-40A7.2	Promoter (<=1kb)	no_rescue	NA
chr9-131545001-131546000	-69.6782	group_2	ENSG00000283526	RP11-40A7.2	Promoter (<=1kb)	no_rescue	NA
chr9-131504001-131505000	-42.9305	group_2	ENSG00000130714	POMT1	5' UTR	partial_rescue	CGI_and_GH
chr9-131310001-131311000	-47.4556	group_3	ENSG00000160539	PLPP7	Intron (ENST00000645295/ENSG00000160539, intron 1 of 4)	partial_rescue	CGI_and_GH
chr9-131302001-131303000	-28.0801	group_4	ENSG00000160539	PLPP7	Intron (ENST00000645295/ENSG00000160539, intron 1 of 4)	full_rescue	GH_only
chr9-131289001-131290000	-25.3115	group_3	ENSG00000160539	PLPP7	Promoter (<=1kb)	full_rescue	GH_only
chr9-131238001-131239000	-32.7621	group_3	ENSG00000226987	RP11-544A12.5	Promoter (1-2kb)	full_rescue	GH_only
chr9-131124001-131125000	-33.1656	group_3	ENSG00000126883	NUP214	Promoter (<=1kb)	full_rescue	CGI_and_GH
chr9-131011001-131012000	-33.3333	group_3	ENSG00000050555	LAMC3	Intron (ENST00000361069/ENSG00000050555, intron 1 of 27)	full_rescue	CGI_only
chr9-131008001-131009000	-32.1202	group_3	ENSG00000050555	LAMC3	Promoter (<=1kb)	full_rescue	CGI_only
chr9-130991001-130992000	-25.7733	group_1	ENSG00000050555	LAMC3	Distal Intergenic	full_rescue	NA
chr9-130932001-130933000	-39.55	group_3	ENSG00000130720	FIBCD1	Intron (ENST00000448616/ENSG00000130720, intron 2 of 7)	full_rescue	CGI_and_GH
chr9-130913001-130914000	-42.2237	group_3	ENSG00000130720	FIBCD1	Intron (ENST00000448616/ENSG00000130720, intron 5 of 7)	partial_rescue	CGI_and_GH
chr9-130680001-130681000	-46.9691	group_4	ENSG00000130711	PRDM12	Intron (ENST00000253008/ENSG00000130711, intron 4 of 4)	full_rescue	CGI_and_GH
chr9-130658001-130659000	-46.2963	group_2	ENSG00000130711	PRDM12	Distal Intergenic	no_rescue	CGI_only
chr9-130638001-130639000	-38.3193	group_2	ENSG00000107164	FUBP3	3' UTR	partial_rescue	NA
chr9-130628001-130629000	-37.7152	group_3	ENSG00000107164	FUBP3	Intron (ENST00000319725/ENSG00000107164, intron 12 of 18)	partial_rescue	NA
chr9-130578001-130579000	-30.068	group_2	ENSG00000107164	FUBP3	Promoter (<=1kb)	full_rescue	CGI_only
chr9-130553001-130554000	-29.4508	group_4	ENSG00000107164	FUBP3	Distal Intergenic	full_rescue	NA
chr9-130550001-130551000	-32.987	group_3	ENSG00000107164	FUBP3	Distal Intergenic	full_rescue	NA
chr9-130537001-130538000	-39.7976	group_3	ENSG00000107164	FUBP3	Distal Intergenic	full_rescue	CGI_only
chr9-130535001-130536000	-29.2105	group_1	ENSG00000107164	FUBP3	Distal Intergenic	full_rescue	CGI_only
chr9-130434001-130435000	-30.7794	group_2	ENSG00000148357	HMCN2	3' UTR	partial_rescue	CGI_and_GH
chr9-130421001-130422000	-63.4081	group_2	ENSG00000148357	HMCN2	Intron (ENST00000624552/ENSG00000148357, intron 86 of 97)	no_rescue	GH_only
chr9-130193001-130194000	-26.9485	group_2	ENSG00000107130	NCS1	Exon (ENST00000493042/ENSG00000107130, exon 1 of 3)	full_rescue	NA
chr9-130185001-130186000	-25.6344	group_2	ENSG00000107130	NCS1	Intron (ENST00000372398/ENSG00000107130, intron 1 of 7)	no_rescue	NA
chr9-130138001-130139000	-31.2932	group_1	ENSG00000148358	GPR107	3' UTR	partial_rescue	GH_only
chr9-130119001-130120000	-31.585	group_4	ENSG00000148358	GPR107	Intron (ENST00000372406/ENSG00000148358, intron 16 of 19)	full_rescue	GH_only
chr9-130057001-130058000	-43.3333	group_4	ENSG00000148358	GPR107	Intron (ENST00000372406/ENSG00000148358, intron 1 of 19)	full_rescue	GH_only
chr9-129884001-129885000	-27.2026	group_3	ENSG00000224988	RP11-409K20.7	Promoter (<=1kb)	full_rescue	CGI_and_GH
chr9-129881001-129882000	-32.4304	group_4	ENSG00000136878	USP20	3' UTR	full_rescue	GH_only
chr9-129880001-129881000	-29.9897	group_4	ENSG00000136878	USP20	3' UTR	full_rescue	GH_only
chr9-129792001-129793000	-52.5	group_2	ENSG00000233909	UBE2V1P4	Promoter (<=1kb)	full_rescue	GH_only
chr9-129738001-129739000	-28.881	group_1	ENSG00000148344	PTGES	3' UTR	full_rescue	CGI_and_GH
chr9-129731001-129732000	-28.7887	group_3	ENSG00000236024	PRRX2-AS1	Distal Intergenic	full_rescue	NA
chr9-129719001-129720000	-33.4819	group_3	ENSG00000167157	PRRX2	Exon (ENST00000372469/ENSG00000167157, exon 2 of 4)	full_rescue	CGI_only
chr9-129624001-129625000	-58.8862	group_2	ENSG00000148335	NTMT1	Intron (ENST00000372486/ENSG00000148335, intron 1 of 3)	full_rescue	CGI_and_GH
chr9-129621001-129622000	-35.6817	group_3	ENSG00000148335	NTMT1	Intron (ENST00000372486/ENSG00000148335, intron 1 of 3)	full_rescue	CGI_and_GH
chr9-129619001-129620000	-31.8052	group_2	ENSG00000148335	NTMT1	Exon (ENST00000372478/ENSG00000179058, exon 2 of 7)	full_rescue	CGI_and_GH
chr9-129607001-129608000	-25.8154	group_3	ENSG00000148335	NTMT1	Promoter (<=1kb)	full_rescue	GH_only
chr9-129604001-129605000	-27.8123	group_4	ENSG00000148335	NTMT1	Distal Intergenic	full_rescue	GH_only
chr9-129596001-129597000	-29.6349	group_2	ENSG00000148335	NTMT1	Distal Intergenic	partial_rescue	CGI_and_GH
chr9-129489001-129490000	-26.7517	group_1	ENSG00000204054	LINC00963	Exon (ENST00000653047/ENSG00000204054, exon 2 of 3)	full_rescue	CGI_and_GH
chr9-129487001-129488000	-31.2453	group_2	ENSG00000204054	LINC00963	Intron (ENST00000653047/ENSG00000204054, intron 1 of 2)	full_rescue	CGI_and_GH
chr9-129484001-129485000	-44.2545	group_3	ENSG00000204054	LINC00963	Intron (ENST00000653047/ENSG00000204054, intron 1 of 2)	partial_rescue	CGI_and_GH
chr9-129483001-129484000	-29.3867	group_1	ENSG00000204054	LINC00963	Exon (ENST00000454968/ENSG00000204054, exon 1 of 4)	no_rescue	CGI_and_GH
chr9-129436001-129437000	-51.1205	group_1	ENSG00000230676	RP11-65J3.3	Intron (ENST00000436510/ENSG00000230676, intron 1 of 1)	no_rescue	CGI_and_GH
chr9-129421001-129422000	-35.9703	group_4	ENSG00000226355	RP11-65J3.2	Distal Intergenic	full_rescue	NA
chr9-129344001-129345000	-32.284	group_4	ENSG00000233901	LINC01503	Intron (ENST00000427109/ENSG00000233901, intron 4 of 4)	full_rescue	GH_only
chr9-129335001-129336000	-35.1181	group_2	ENSG00000233901	LINC01503	Intron (ENST00000427109/ENSG00000233901, intron 2 of 4)	no_rescue	CGI_and_GH
chr9-129282001-129283000	-27.6543	group_1	ENSG00000224307	RP11-344B5.2	Promoter (<=1kb)	full_rescue	GH_only
chr9-129261001-129262000	-35.0255	group_4	ENSG00000204055	RP11-247A12.2	Exon (ENST00000435157/ENSG00000204055, exon 2 of 2)	full_rescue	NA
chr9-129259001-129260000	-27.4888	group_2	ENSG00000204055	RP11-247A12.2	3' UTR	full_rescue	CGI_only
chr9-129254001-129255000	-25.1986	group_3	ENSG00000204055	RP11-247A12.2	Intron (ENST00000674559/ENSG00000235007, intron 3 of 6)	full_rescue	NA
chr9-129237001-129238000	-27.8211	group_1	ENSG00000204055	RP11-247A12.2	Intron (ENST00000674559/ENSG00000235007, intron 3 of 6)	full_rescue	NA
chr9-129222001-129223000	-26.5454	group_3	ENSG00000204055	RP11-247A12.2	Intron (ENST00000674559/ENSG00000235007, intron 3 of 6)	full_rescue	NA
chr9-129183001-129184000	-33.3333	group_4	ENSG00000204055	RP11-247A12.2	Intron (ENST00000674648/ENSG00000235007, intron 2 of 2)	partial_rescue	NA
chr9-129182001-129183000	-30.1823	group_1	ENSG00000204055	RP11-247A12.2	Intron (ENST00000674648/ENSG00000235007, intron 2 of 2)	no_rescue	GH_only
chr9-129179001-129180000	-35.7834	group_2	ENSG00000204055	RP11-247A12.2	Intron (ENST00000674648/ENSG00000235007, intron 2 of 2)	full_rescue	CGI_and_GH
chr9-129173001-129174000	-29.3479	group_2	ENSG00000235007	RP11-344B5.4	Intron (ENST00000674648/ENSG00000235007, intron 2 of 2)	partial_rescue	CGI_and_GH
chr9-129143001-129144000	-31.8456	group_1	ENSG00000119383	PTPA	3' UTR	partial_rescue	GH_only
chr9-129100001-129101000	-37.2826	group_2	ENSG00000095321	CRAT	3' UTR	partial_rescue	NA
chr9-129072001-129073000	-39.0303	group_2	ENSG00000148343	MIGA2	3' UTR	full_rescue	GH_only
chr9-129071001-129072000	-35.7152	group_3	ENSG00000148343	MIGA2	3' UTR	full_rescue	GH_only
chr9-129053001-129054000	-30.0512	group_4	ENSG00000148343	MIGA2	Intron (ENST00000439290/ENSG00000148343, intron 7 of 16)	full_rescue	NA
chr9-128928001-128929000	-25.5636	group_2	ENSG00000175287	PHYHD1	Intron (ENST00000372592/ENSG00000175287, intron 4 of 12)	full_rescue	NA
chr9-128912001-128913000	-26.2986	group_3	ENSG00000136802	LRRC8A	Exon (ENST00000492784/ENSG00000136802, exon 1 of 2)	full_rescue	GH_only
chr9-128725001-128726000	-40.2346	group_2	ENSG00000223478	RP11-545E17.3	Promoter (<=1kb)	full_rescue	CGI_only
chr9-128635001-128636000	-29.6603	group_3	ENSG00000119333	WDR34	3' UTR	full_rescue	NA
chr9-128587001-128588000	-38.0645	group_3	ENSG00000197694	SPTAN1	Exon (ENST00000372731/ENSG00000197694, exon 20 of 56)	partial_rescue	NA
chr9-128549001-128550000	-42.173	group_3	ENSG00000228395	RP11-216B9.6	Intron (ENST00000434999/ENSG00000228395, intron 1 of 3)	full_rescue	CGI_and_GH
chr9-128429001-128430000	-50	group_4	ENSG00000167123	CERCAM	5' UTR	full_rescue	NA
chr9-128419001-128420000	-41.4256	group_1	ENSG00000167123	CERCAM	5' UTR	full_rescue	CGI_and_GH
chr9-128411001-128412000	-41.7221	group_3	ENSG00000167123	CERCAM	Promoter (<=1kb)	partial_rescue	GH_only
chr9-128409001-128410000	-32.5037	group_1	ENSG00000167123	CERCAM	Promoter (1-2kb)	no_rescue	NA
chr9-128405001-128406000	-43.312	group_2	ENSG00000167123	CERCAM	Distal Intergenic	partial_rescue	NA
chr9-128400001-128401000	-29.4442	group_4	ENSG00000207955	MIR219A2	Distal Intergenic	full_rescue	GH_only
chr9-128398001-128399000	-31.8494	group_4	ENSG00000207955	MIR219A2	Distal Intergenic	full_rescue	GH_only
chr9-128396001-128397000	-43.0792	group_2	ENSG00000207955	MIR219A2	Distal Intergenic	full_rescue	GH_only
chr9-128391001-128392000	-49.8328	group_2	ENSG00000167118	URM1	3' UTR	no_rescue	CGI_only
chr9-128383001-128384000	-27.442	group_1	ENSG00000167118	URM1	Intron (ENST00000470840/ENSG00000167118, intron 2 of 4)	full_rescue	GH_only
chr9-128363001-128364000	-49.0353	group_4	ENSG00000167118	URM1	Distal Intergenic	full_rescue	GH_only
chr9-128099001-128100000	-33.663	group_2	ENSG00000148339	SLC25A25	3' UTR	full_rescue	GH_only
chr9-128091001-128092000	-39.3269	group_3	ENSG00000148339	SLC25A25	5' UTR	full_rescue	GH_only
chr9-128001001-128002000	-25.6339	group_2	ENSG00000167106	FAM102A	Distal Intergenic	full_rescue	GH_only
chr9-127999001-128000000	-90.9091	group_2	ENSG00000167106	FAM102A	Distal Intergenic	partial_rescue	GH_only
chr9-127854001-127855000	-42.0217	group_3	ENSG00000106991	ENG	Promoter (<=1kb)	full_rescue	CGI_only
chr9-127832001-127833000	-34.9587	group_4	ENSG00000222421	Y_RNA	Promoter (<=1kb)	full_rescue	GH_only
chr9-127747001-127748000	-64.7059	group_3	ENSG00000095370	SH2D3C	Exon (ENST00000373277/ENSG00000095370, exon 5 of 11)	full_rescue	NA
chr9-127743001-127744000	-27.5327	group_2	ENSG00000095370	SH2D3C	Intron (ENST00000373277/ENSG00000095370, intron 6 of 10)	full_rescue	NA
chr9-127724001-127725000	-34.122	group_3	ENSG00000187024	PTRH1	Promoter (<=1kb)	full_rescue	CGI_only
chr9-127592001-127593000	-34.9229	group_4	ENSG00000136854	STXBP1	Intron (ENST00000637521/ENSG00000136854, intron 1 of 19)	full_rescue	NA
chr9-127579001-127580000	-39.7638	group_2	ENSG00000136854	STXBP1	Promoter (<=1kb)	full_rescue	GH_only
chr9-127519001-127520000	-29.0846	group_4	ENSG00000136830	FAM129B	Intron (ENST00000373314/ENSG00000136830, intron 5 of 13)	full_rescue	GH_only
chr9-127436001-127437000	-57.1429	group_3	ENSG00000196152	ZNF79	Exon (ENST00000543471/ENSG00000196152, exon 5 of 6)	partial_rescue	NA
chr9-127353001-127354000	-27.8871	group_2	ENSG00000136895	GARNL3	3' UTR	no_rescue	NA
chr9-127226001-127227000	-29.4519	group_2	ENSG00000136895	GARNL3	Intron (ENST00000439286/ENSG00000136895, intron 1 of 10)	full_rescue	CGI_and_GH
chr9-127121001-127122000	-33.9357	group_1	ENSG00000136828	RALGPS1	Intron (ENST00000424082/ENSG00000136828, intron 8 of 17)	no_rescue	GH_only
chr9-126978001-126979000	-82.7586	group_1	ENSG00000136828	RALGPS1	Exon (ENST00000480993/ENSG00000136828, exon 4 of 4)	no_rescue	NA
chr9-126961001-126962000	-52.9655	group_2	ENSG00000136828	RALGPS1	Intron (ENST00000424082/ENSG00000136828, intron 1 of 17)	partial_rescue	GH_only
chr9-126893001-126894000	-43.8426	group_2	ENSG00000136828	RALGPS1	Distal Intergenic	partial_rescue	NA
chr9-126886001-126887000	-33.1995	group_3	ENSG00000177125	ZBTB34	Distal Intergenic	full_rescue	GH_only
chr9-126863001-126864000	-30.0928	group_4	ENSG00000177125	ZBTB34	Intron (ENST00000319119/ENSG00000177125, intron 1 of 1)	full_rescue	CGI_and_GH
chr9-126795001-126796000	-25.619	group_4	ENSG00000169155	ZBTB43	Distal Intergenic	full_rescue	GH_only
chr9-126671001-126672000	-37.3318	group_2	ENSG00000136944	LMX1B	Intron (ENST00000355497/ENSG00000136944, intron 2 of 7)	no_rescue	CGI_only
chr9-126639001-126640000	-29.9562	group_1	ENSG00000136944	LMX1B	Intron (ENST00000355497/ENSG00000136944, intron 2 of 7)	partial_rescue	NA
chr9-126627001-126628000	-30.994	group_1	ENSG00000136944	LMX1B	Intron (ENST00000355497/ENSG00000136944, intron 2 of 7)	full_rescue	CGI_only
chr9-126609001-126610000	-49.0675	group_2	ENSG00000224842	RP11-123K19.1	Exon (ENST00000425370/ENSG00000224842, exon 2 of 3)	no_rescue	CGI_only
chr9-126555001-126556000	-32	group_4	ENSG00000226078	RP11-205K6.2	Distal Intergenic	full_rescue	NA
chr9-126535001-126536000	-39.3481	group_1	ENSG00000226078	RP11-205K6.2	Distal Intergenic	partial_rescue	NA
chr9-126528001-126529000	-42.471	group_3	ENSG00000226078	RP11-205K6.2	Promoter (<=1kb)	full_rescue	NA
chr9-126519001-126520000	-31.9196	group_4	ENSG00000279137	RP11-205K6.3	Promoter (<=1kb)	full_rescue	NA
chr9-126482001-126483000	-66.6701	group_1	ENSG00000196814	MVB12B	Intron (ENST00000361171/ENSG00000196814, intron 8 of 9)	no_rescue	CGI_and_GH
chr9-126476001-126477000	-25.0259	group_4	ENSG00000196814	MVB12B	Intron (ENST00000361171/ENSG00000196814, intron 7 of 9)	full_rescue	GH_only
chr9-126147001-126148000	-33.3333	group_4	ENSG00000232413	RP11-343J18.2	Intron (ENST00000441473/ENSG00000232413, intron 1 of 1)	full_rescue	NA
chr9-125991001-125992000	-27.1893	group_4	ENSG00000232413	RP11-343J18.2	Distal Intergenic	full_rescue	NA
chr9-125652001-125653000	-50.5556	group_4	ENSG00000119487	MAPKAP1	Exon (ENST00000468896/ENSG00000119487, exon 2 of 4)	full_rescue	GH_only
chr9-125522001-125523000	-31.7103	group_4	ENSG00000119487	MAPKAP1	Intron (ENST00000373511/ENSG00000119487, intron 7 of 10)	full_rescue	GH_only
chr9-124967001-124968000	-60.7143	group_4	ENSG00000173611	SCAI	Intron (ENST00000336505/ENSG00000173611, intron 17 of 17)	full_rescue	NA
chr9-124942001-124943000	-27.4704	group_2	ENSG00000136935	GOLGA1	3' UTR	full_rescue	CGI_and_GH
chr9-124819001-124820000	-33.3394	group_4	ENSG00000136918	WDR38	Distal Intergenic	full_rescue	GH_only
chr9-124811001-124812000	-29.3914	group_1	ENSG00000185585	OLFML2A	3' UTR	partial_rescue	CGI_and_GH
chr9-124796001-124797000	-25.3075	group_3	ENSG00000185585	OLFML2A	Intron (ENST00000373580/ENSG00000185585, intron 3 of 7)	full_rescue	GH_only
chr9-124568001-124569000	-28.3871	group_4	ENSG00000148200	NR6A1	Intron (ENST00000487099/ENSG00000148200, intron 2 of 9)	full_rescue	NA
chr9-124506001-124507000	-30.5281	group_4	ENSG00000136931	NR5A1	Promoter (<=1kb)	full_rescue	CGI_and_GH
chr9-124487001-124488000	-52.8714	group_2	ENSG00000136931	NR5A1	Intron (ENST00000373588/ENSG00000136931, intron 6 of 6)	partial_rescue	CGI_and_GH
chr9-124400001-124401000	-40.5106	group_2	ENSG00000136930	PSMB7	Intron (ENST00000259457/ENSG00000136930, intron 5 of 7)	partial_rescue	NA
chr9-124262001-124263000	-36.3248	group_3	ENSG00000227200	RP11-121A14.3	Promoter (<=1kb)	full_rescue	GH_only
chr9-124243001-124244000	-32.9009	group_2	ENSG00000119408	NEK6	Distal Intergenic	full_rescue	GH_only
chr9-124242001-124243000	-28.8986	group_3	ENSG00000119408	NEK6	Distal Intergenic	partial_rescue	GH_only
chr9-124029001-124030000	-47.3485	group_3	ENSG00000106689	LHX2	Intron (ENST00000373615/ENSG00000106689, intron 4 of 4)	partial_rescue	NA
chr9-123997001-123998000	-37.0343	group_1	ENSG00000106689	LHX2	Distal Intergenic	no_rescue	CGI_only
chr9-123996001-123997000	-40.5097	group_2	ENSG00000106689	LHX2	Distal Intergenic	full_rescue	NA
chr9-123449001-123450000	-29.4118	group_4	ENSG00000119522	DENND1A	Intron (ENST00000473039/ENSG00000119522, intron 13 of 17)	full_rescue	NA
chr9-123425001-123426000	-31.3772	group_4	ENSG00000119522	DENND1A	Intron (ENST00000473039/ENSG00000119522, intron 14 of 17)	full_rescue	NA
chr9-123423001-123424000	-35.7966	group_2	ENSG00000119522	DENND1A	Intron (ENST00000473039/ENSG00000119522, intron 14 of 17)	full_rescue	NA
chr9-123422001-123423000	-37.3544	group_4	ENSG00000119522	DENND1A	Intron (ENST00000473039/ENSG00000119522, intron 14 of 17)	full_rescue	NA
chr9-123420001-123421000	-45.708	group_4	ENSG00000119522	DENND1A	Intron (ENST00000473039/ENSG00000119522, intron 14 of 17)	full_rescue	NA
chr9-123399001-123400000	-43.0303	group_2	ENSG00000119522	DENND1A	Intron (ENST00000473039/ENSG00000119522, intron 15 of 17)	partial_rescue	NA
chr9-123373001-123374000	-69.8109	group_1	ENSG00000148204	CRB2	Exon (ENST00000359999/ENSG00000148204, exon 10 of 10)	full_rescue	CGI_and_GH
chr9-123366001-123367000	-75.1344	group_2	ENSG00000148204	CRB2	Exon (ENST00000359999/ENSG00000148204, exon 3 of 10)	no_rescue	CGI_and_GH
chr9-123365001-123366000	-34.5747	group_3	ENSG00000148204	CRB2	Exon (ENST00000359999/ENSG00000148204, exon 3 of 10)	partial_rescue	CGI_and_GH
chr9-123360001-123361000	-52.1154	group_2	ENSG00000148204	CRB2	Intron (ENST00000359999/ENSG00000148204, intron 1 of 9)	full_rescue	GH_only
chr9-123357001-123358000	-46.9002	group_2	ENSG00000148204	CRB2	Promoter (<=1kb)	full_rescue	GH_only
chr9-123354001-123355000	-39.9797	group_2	ENSG00000148204	CRB2	Promoter (1-2kb)	full_rescue	GH_only
chr9-123339001-123340000	-51.2202	group_3	ENSG00000148204	CRB2	Distal Intergenic	full_rescue	CGI_only
chr9-123215001-123216000	-37.1717	group_4	ENSG00000165209	STRBP	Intron (ENST00000348403/ENSG00000165209, intron 2 of 18)	partial_rescue	NA
chr9-122811001-122812000	-43.9525	group_4	ENSG00000136940	PDCL	Intron (ENST00000436632/ENSG00000136940, intron 2 of 2)	full_rescue	NA
chr9-122788001-122789000	-30.7758	group_4	ENSG00000148215	OR5C1	Promoter (<=1kb)	full_rescue	NA
chr9-122784001-122785000	-58.5165	group_3	ENSG00000148215	OR5C1	Distal Intergenic	full_rescue	NA
chr9-122760001-122761000	-30.6522	group_4	ENSG00000232387	SKA2P1	Promoter (<=1kb)	full_rescue	NA
chr9-122742001-122743000	-30.2801	group_3	ENSG00000171459	OR1L6	Promoter (<=1kb)	full_rescue	NA
chr9-122675001-122676000	-45.2804	group_3	ENSG00000171481	OR1L3	Promoter (<=1kb)	full_rescue	NA
chr9-122628001-122629000	-33.6435	group_3	ENSG00000234156	RP11-64P14.7	Exon (ENST00000623530/ENSG00000280094, exon 1 of 1)	full_rescue	NA
chr9-122527001-122528000	-32.9154	group_3	ENSG00000171505	OR1N1	Promoter (<=1kb)	full_rescue	NA
chr9-122454001-122455000	-69.3277	group_2	ENSG00000234156	RP11-64P14.7	Intron (ENST00000433572/ENSG00000234156, intron 6 of 6)	full_rescue	NA
chr9-122434001-122435000	-34.6908	group_2	ENSG00000234156	RP11-64P14.7	Intron (ENST00000433572/ENSG00000234156, intron 4 of 6)	full_rescue	NA
chr9-1224001-1225000	-29.8521	group_3	ENSG00000236594	RPS27AP14	Distal Intergenic	full_rescue	NA
chr9-122372001-122373000	-26.1149	group_2	ENSG00000269970	RP11-498E2.9	Promoter (<=1kb)	full_rescue	GH_only
chr9-122342001-122343000	-48.7069	group_2	ENSG00000095303	PTGS1	Distal Intergenic	full_rescue	NA
chr9-122332001-122333000	-28.3788	group_2	ENSG00000095303	PTGS1	Distal Intergenic	full_rescue	GH_only
chr9-122331001-122332000	-28.5185	group_4	ENSG00000148187	MRRF	3' UTR	full_rescue	GH_only
chr9-122243001-122244000	-64.2857	group_4	ENSG00000119446	RBM18	Exon (ENST00000491850/ENSG00000119446, exon 3 of 4)	full_rescue	NA
chr9-122125001-122126000	-32.9121	group_1	ENSG00000266583	MIR4478	Distal Intergenic	partial_rescue	CGI_only
chr9-122070001-122071000	-29.5455	group_4	ENSG00000175764	TTLL11	Intron (ENST00000321582/ENSG00000175764, intron 1 of 8)	full_rescue	NA
chr9-121896001-121897000	-26.9144	group_4	ENSG00000175764	TTLL11	Intron (ENST00000321582/ENSG00000175764, intron 6 of 8)	full_rescue	CGI_only
chr9-121884001-121885000	-27.177	group_2	ENSG00000175764	TTLL11	Exon (ENST00000411790/ENSG00000237548, exon 2 of 2)	full_rescue	NA
chr9-121802001-121803000	-56.5217	group_3	ENSG00000261534	RP11-244O19.1	Distal Intergenic	full_rescue	NA
chr9-121765001-121766000	-26.4017	group_3	ENSG00000136848	DAB2IP	Intron (ENST00000259371/ENSG00000136848, intron 8 of 16)	partial_rescue	NA
chr9-121740001-121741000	-36.9826	group_4	ENSG00000136848	DAB2IP	Intron (ENST00000394340/ENSG00000136848, intron 3 of 5)	full_rescue	NA
chr9-121727001-121728000	-48	group_4	ENSG00000136848	DAB2IP	Intron (ENST00000394340/ENSG00000136848, intron 3 of 5)	full_rescue	GH_only
chr9-121718001-121719000	-71.6814	group_3	ENSG00000136848	DAB2IP	Intron (ENST00000394340/ENSG00000136848, intron 3 of 5)	no_rescue	GH_only
chr9-121413001-121414000	-32.5	group_4	ENSG00000227355	RP11-162D16.2	Intron (ENST00000658975/ENSG00000227355, intron 2 of 5)	full_rescue	NA
chr9-121352001-121353000	-28.4211	group_4	ENSG00000148175	STOM	Intron (ENST00000286713/ENSG00000148175, intron 4 of 6)	full_rescue	GH_only
chr9-121301001-121302000	-25.9259	group_4	ENSG00000148180	GSN	5' UTR	full_rescue	CGI_and_GH
chr9-121073001-121074000	-69.7861	group_4	ENSG00000119397	CNTRL	Promoter (<=1kb)	full_rescue	CGI_and_GH
chr9-121072001-121073000	-52.381	group_4	ENSG00000119397	CNTRL	Promoter (1-2kb)	full_rescue	CGI_and_GH
chr9-120942001-120943000	-28.297	group_2	ENSG00000056558	TRAF1	Distal Intergenic	full_rescue	GH_only
chr9-120899001-120900000	-27.0951	group_4	ENSG00000119403	PHF19	Downstream (2-3kb)	full_rescue	GH_only
chr9-120837001-120838000	-44.4444	group_4	ENSG00000095261	PSMD5	Intron (ENST00000589026/ENSG00000226752, intron 1 of 3)	full_rescue	NA
chr9-120697001-120698000	-44.2105	group_4	ENSG00000106780	MEGF9	Intron (ENST00000373930/ENSG00000106780, intron 1 of 5)	full_rescue	GH_only
chr9-120571001-120572000	-30.8333	group_4	ENSG00000136861	CDK5RAP2	Exon (ENST00000360822/ENSG00000136861, exon 2 of 35)	full_rescue	GH_only
chr9-120472001-120473000	-29.447	group_4	ENSG00000136861	CDK5RAP2	Intron (ENST00000360822/ENSG00000136861, intron 15 of 34)	full_rescue	NA
chr9-120330001-120331000	-28.1173	group_4	ENSG00000207814	MIR147A	Distal Intergenic	full_rescue	NA
chr9-119969001-119970000	-25.6443	group_1	ENSG00000225960	RP11-360A18.1	Distal Intergenic	full_rescue	NA
chr9-118742001-118743000	-37.4183	group_3	ENSG00000235201	RP11-127L21.1	Intron (ENST00000456032/ENSG00000235201, intron 1 of 1)	full_rescue	NA
chr9-11843001-11844000	-66.6667	group_3	ENSG00000285784	NA	Intron (ENST00000649122/ENSG00000285784, intron 3 of 5)	partial_rescue	NA
chr9-118107001-118108000	-79.4872	group_3	ENSG00000234782	TPT1P9	Distal Intergenic	full_rescue	NA
chr9-117783001-117784000	-42.2531	group_1	ENSG00000284977	NA	Exon (ENST00000644986/ENSG00000284977, exon 1 of 3)	partial_rescue	NA
chr9-117750001-117751000	-71.4286	group_4	ENSG00000285082	NA	Intron (ENST00000642985/ENSG00000285082, intron 2 of 4)	full_rescue	NA
chr9-117465001-117466000	-33.3333	group_3	ENSG00000233516	RP11-388N2.1	Promoter (<=1kb)	partial_rescue	NA
chr9-117416001-117417000	-35.184	group_3	ENSG00000148219	ASTN2	Promoter (<=1kb)	full_rescue	CGI_only
chr9-117286001-117287000	-48.3083	group_3	ENSG00000148219	ASTN2	Intron (ENST00000313400/ENSG00000148219, intron 2 of 22)	full_rescue	NA
chr9-117274001-117275000	-38.1837	group_4	ENSG00000148219	ASTN2	Intron (ENST00000313400/ENSG00000148219, intron 2 of 22)	full_rescue	NA
chr9-117271001-117272000	-25.1225	group_4	ENSG00000148219	ASTN2	Intron (ENST00000313400/ENSG00000148219, intron 2 of 22)	full_rescue	NA
chr9-116927001-116928000	-39.966	group_2	ENSG00000148219	ASTN2	Intron (ENST00000313400/ENSG00000148219, intron 10 of 22)	full_rescue	NA
chr9-116661001-116662000	-30.2135	group_2	ENSG00000148219	ASTN2	Intron (ENST00000313400/ENSG00000148219, intron 16 of 22)	full_rescue	GH_only
chr9-116606001-116607000	-28.9286	group_4	ENSG00000148219	ASTN2	Intron (ENST00000313400/ENSG00000148219, intron 19 of 22)	full_rescue	NA
chr9-116505001-116506000	-29.294	group_4	ENSG00000148219	ASTN2	Intron (ENST00000418250/ENSG00000229105, intron 1 of 11)	full_rescue	NA
chr9-116355001-116356000	-40.6245	group_3	ENSG00000182752	PAPPA	Intron (ENST00000328252/ENSG00000182752, intron 17 of 21)	partial_rescue	GH_only
chr9-116285001-116286000	-40	group_4	ENSG00000182752	PAPPA	Exon (ENST00000438048/ENSG00000226604, exon 2 of 2)	full_rescue	GH_only
chr9-115596001-115597000	-39.1304	group_4	ENSG00000228714	RP11-284G10.1	Intron (ENST00000646338/ENSG00000228714, intron 2 of 2)	full_rescue	NA
chr9-115591001-115592000	-33.3333	group_1	ENSG00000228714	RP11-284G10.1	Intron (ENST00000646338/ENSG00000228714, intron 2 of 2)	full_rescue	NA
chr9-115180001-115181000	-35.5792	group_3	ENSG00000173077	2022-12-01	Intron (ENST00000649121/ENSG00000173077, intron 5 of 6)	full_rescue	NA
chr9-115085001-115086000	-31.254	group_4	ENSG00000041982	TNC	Exon (ENST00000350763/ENSG00000041982, exon 3 of 28)	full_rescue	GH_only
chr9-114711001-114712000	-27.4704	group_4	ENSG00000230284	RP11-402G3.4	Distal Intergenic	full_rescue	NA
chr9-114461001-114462000	-30.4511	group_4	ENSG00000095397	WHRN	Intron (ENST00000265134/ENSG00000095397, intron 3 of 11)	full_rescue	NA
chr9-114435001-114436000	-33.6682	group_2	ENSG00000095397	WHRN	Intron (ENST00000265134/ENSG00000095397, intron 3 of 11)	partial_rescue	NA
chr9-114383001-114384000	-25.2435	group_1	ENSG00000106948	AKNA	Intron (ENST00000374088/ENSG00000106948, intron 1 of 21)	full_rescue	GH_only
chr9-114373001-114374000	-35.2575	group_4	ENSG00000106948	AKNA	Intron (ENST00000374088/ENSG00000106948, intron 4 of 21)	full_rescue	GH_only
chr9-114288001-114289000	-26.0391	group_3	ENSG00000196739	COL27A1	3' UTR	full_rescue	NA
chr9-114149001-114150000	-26.6667	group_4	ENSG00000196739	COL27A1	Distal Intergenic	full_rescue	NA
chr9-114126001-114127000	-34.3292	group_3	ENSG00000136883	KIF12	Distal Intergenic	full_rescue	NA
chr9-114107001-114108000	-43.6535	group_3	ENSG00000136883	KIF12	Distal Intergenic	no_rescue	NA
chr9-113851001-113852000	-86.7886	group_3	ENSG00000232905	RP11-534I8.1	Promoter (<=1kb)	full_rescue	NA
chr9-113674001-113675000	-48.3871	group_4	ENSG00000227482	RP11-18B16.2	Intron (ENST00000428292/ENSG00000227482, intron 2 of 2)	full_rescue	GH_only
chr9-113646001-113647000	-39.953	group_4	ENSG00000227482	RP11-18B16.2	Distal Intergenic	full_rescue	NA
chr9-113645001-113646000	-50.2444	group_2	ENSG00000227482	RP11-18B16.2	Distal Intergenic	full_rescue	NA
chr9-113623001-113624000	-28.5565	group_1	ENSG00000233817	RP11-168K11.3	Distal Intergenic	full_rescue	NA
chr9-113610001-113611000	-25.7778	group_2	ENSG00000282897	RP11-168K11.5	Distal Intergenic	no_rescue	NA
chr9-113609001-113610000	-31.2739	group_2	ENSG00000282897	RP11-168K11.5	Distal Intergenic	no_rescue	NA
chr9-113581001-113582000	-26.1584	group_4	ENSG00000138835	RGS3	5' UTR	full_rescue	GH_only
chr9-113451001-113452000	-54.8387	group_3	ENSG00000138835	RGS3	Intron (ENST00000374140/ENSG00000138835, intron 1 of 25)	full_rescue	GH_only
chr9-113417001-113418000	-35.5159	group_4	ENSG00000157653	C9orf43	Intron (ENST00000490544/ENSG00000157653, intron 3 of 4)	full_rescue	GH_only
chr9-113157001-113158000	-27.2381	group_4	ENSG00000136867	SLC31A2	Exon (ENST00000259392/ENSG00000136867, exon 2 of 4)	full_rescue	GH_only
chr9-113130001-113131000	-26.8354	group_4	ENSG00000231528	FAM225A	Distal Intergenic	full_rescue	GH_only
chr9-113096001-113097000	-46.978	group_2	ENSG00000285370	NA	Distal Intergenic	partial_rescue	NA
chr9-113090001-113091000	-44.4641	group_3	ENSG00000285370	NA	Distal Intergenic	full_rescue	CGI_only
chr9-113089001-113090000	-70.8176	group_3	ENSG00000285370	NA	Promoter (1-2kb)	partial_rescue	CGI_only
chr9-113080001-113081000	-78.9182	group_2	ENSG00000284867	NA	Downstream (<1kb)	partial_rescue	CGI_only
chr9-113063001-113064000	-73.7813	group_3	ENSG00000284763	NA	Downstream (1-2kb)	partial_rescue	CGI_only
chr9-113062001-113063000	-77.6542	group_3	ENSG00000285115	NA	Promoter (1-2kb)	partial_rescue	CGI_only
chr9-113061001-113062000	-89.1714	group_2	ENSG00000285115	NA	Promoter (<=1kb)	no_rescue	CGI_only
chr9-113060001-113061000	-64.963	group_1	ENSG00000285115	NA	Promoter (<=1kb)	no_rescue	CGI_and_GH
chr9-113059001-113060000	-79.7902	group_2	ENSG00000285115	NA	Promoter (<=1kb)	no_rescue	CGI_and_GH
chr9-113057001-113058000	-37.957	group_2	ENSG00000136866	ZFP37	Promoter (<=1kb)	full_rescue	CGI_and_GH
chr9-112990001-112991000	-72	group_4	ENSG00000228623	ZNF883	Intron (ENST00000639709/ENSG00000228623, intron 1 of 7)	full_rescue	NA
chr9-112979001-112980000	-37.3777	group_3	ENSG00000228623	ZNF883	Intron (ENST00000639709/ENSG00000228623, intron 1 of 7)	full_rescue	NA
chr9-112971001-112972000	-37.588	group_2	ENSG00000228623	ZNF883	Intron (ENST00000639709/ENSG00000228623, intron 1 of 7)	full_rescue	NA
chr9-112962001-112963000	-33.5577	group_3	ENSG00000237906	MUPP	Promoter (<=1kb)	full_rescue	NA
chr9-112945001-112946000	-30.3121	group_2	ENSG00000237906	MUPP	Distal Intergenic	full_rescue	CGI_only
chr9-112891001-112892000	-40.5153	group_1	ENSG00000119457	SLC46A2	Promoter (<=1kb)	no_rescue	CGI_and_GH
chr9-112352001-112353000	-38.8889	group_4	ENSG00000213529	RP11-432F4.2	Distal Intergenic	full_rescue	NA
chr9-112076001-112077000	-25.705	group_4	ENSG00000106868	SUSD1	Intron (ENST00000374270/ENSG00000106868, intron 12 of 16)	full_rescue	GH_only
chr9-111868001-111869000	-53.019	group_3	ENSG00000148154	UGCG	Distal Intergenic	full_rescue	NA
chr9-111766001-111767000	-38.0952	group_4	ENSG00000165181	C9orf84	Intron (ENST00000374287/ENSG00000165181, intron 2 of 24)	full_rescue	NA
chr9-111741001-111742000	-36.2003	group_4	ENSG00000165181	C9orf84	Exon (ENST00000394777/ENSG00000165181, exon 7 of 23)	full_rescue	GH_only
chr9-1114001-1115000	-25.094	group_4	ENSG00000224836	RP11-341G2.3	Distal Intergenic	full_rescue	NA
chr9-111315001-111316000	-25.2747	group_4	ENSG00000171133	OR2K2	Distal Intergenic	full_rescue	NA
chr9-111286001-111287000	-34.3537	group_4	ENSG00000227531	RP11-202G18.1	Promoter (1-2kb)	full_rescue	NA
chr9-111121001-111122000	-30.4992	group_3	ENSG00000212409	RNY4P18	Distal Intergenic	full_rescue	NA
chr9-110292001-110293000	-54.8271	group_3	ENSG00000136810	TXN	Distal Intergenic	full_rescue	NA
chr9-109952001-109953000	-35.2564	group_4	ENSG00000157654	PALM2-AKAP2	Intron (ENST00000374530/ENSG00000157654, intron 6 of 10)	full_rescue	NA
chr9-109715001-109716000	-30.82	group_4	ENSG00000157654	PALM2-AKAP2	Intron (ENST00000674068/ENSG00000157654, intron 2 of 2)	full_rescue	NA
chr9-109641001-109642000	-48.2641	group_1	ENSG00000157654	PALM2-AKAP2	Intron (ENST00000674068/ENSG00000157654, intron 2 of 2)	partial_rescue	CGI_only
chr9-109609001-109610000	-62.5	group_4	ENSG00000157654	PALM2-AKAP2	Intron (ENST00000674068/ENSG00000157654, intron 2 of 2)	full_rescue	NA
chr9-10960001-10961000	-49.2823	group_3	ENSG00000270372	RP11-109M17.2	Distal Intergenic	partial_rescue	NA
chr9-109560001-109561000	-44.0323	group_2	ENSG00000157654	PALM2-AKAP2	Intron (ENST00000674068/ENSG00000157654, intron 2 of 2)	full_rescue	GH_only
chr9-109505001-109506000	-36.3636	group_4	ENSG00000157654	PALM2-AKAP2	Intron (ENST00000674068/ENSG00000157654, intron 1 of 2)	full_rescue	GH_only
chr9-109499001-109500000	-34.7763	group_1	ENSG00000157654	PALM2-AKAP2	Promoter (<=1kb)	partial_rescue	CGI_and_GH
chr9-109414001-109415000	-34.1771	group_3	ENSG00000070159	PTPN3	Intron (ENST00000412145/ENSG00000070159, intron 9 of 20)	full_rescue	NA
chr9-109346001-109347000	-27.8571	group_4	ENSG00000207329	Y_RNA	Distal Intergenic	full_rescue	GH_only
chr9-109345001-109346000	-27.4915	group_3	ENSG00000207329	Y_RNA	Distal Intergenic	full_rescue	GH_only
chr9-109316001-109317000	-28.501	group_3	ENSG00000095203	EPB41L4B	Intron (ENST00000374566/ENSG00000095203, intron 1 of 25)	full_rescue	GH_only
chr9-109258001-109259000	-32.9264	group_3	ENSG00000095203	EPB41L4B	Exon (ENST00000374566/ENSG00000095203, exon 7 of 26)	full_rescue	GH_only
chr9-108979001-108980000	-32.4638	group_4	ENSG00000119326	CTNNAL1	Exon (ENST00000374595/ENSG00000119326, exon 7 of 19)	full_rescue	NA
chr9-108871001-108872000	-54.5455	group_4	ENSG00000070061	IKBKAP	Intron (ENST00000674740/ENSG00000070061, intron 8 of 8)	full_rescue	NA
chr9-108823001-108824000	-26.5625	group_3	ENSG00000231810	RPL36AP35	Distal Intergenic	partial_rescue	NA
chr9-108495001-108496000	-28.8762	group_4	ENSG00000169253	RP11-220D10.1	Distal Intergenic	full_rescue	NA
chr9-108163001-108164000	-35.6281	group_3	ENSG00000237360	CHCHD4P2	Distal Intergenic	partial_rescue	NA
chr9-108003001-108004000	-42.8571	group_3	ENSG00000213557	RP11-240E2.2	Distal Intergenic	partial_rescue	NA
chr9-107810001-107811000	-37.1765	group_4	ENSG00000244104	RN7SL659P	Promoter (<=1kb)	full_rescue	NA
chr9-107733001-107734000	-26.7544	group_4	ENSG00000222558	RNU6-1064P	Distal Intergenic	full_rescue	NA
chr9-10689001-10690000	-46.1538	group_4	ENSG00000232035	RP11-87N24.3	Distal Intergenic	full_rescue	NA
chr9-106743001-106744000	-47.619	group_4	ENSG00000228143	RP11-308N19.5	Distal Intergenic	full_rescue	NA
chr9-106621001-106622000	-28.4075	group_1	ENSG00000234323	LINC01505	Intron (ENST00000637185/ENSG00000234323, intron 3 of 7)	partial_rescue	GH_only
chr9-106073001-106074000	-48.4702	group_4	ENSG00000234323	LINC01505	Intron (ENST00000637185/ENSG00000234323, intron 1 of 7)	full_rescue	NA
chr9-105958001-105959000	-29.9928	group_4	ENSG00000234323	LINC01505	Distal Intergenic	full_rescue	NA
chr9-105782001-105783000	-40.9589	group_3	ENSG00000232486	RP11-18B3.2	Distal Intergenic	full_rescue	NA
chr9-105064001-105065000	-29.0615	group_4	ENSG00000286536	NA	Intron (ENST00000666856/ENSG00000286536, intron 7 of 7)	full_rescue	GH_only
chr9-104279001-104280000	-50	group_4	ENSG00000242111	TOPORSLP1	Intron (ENST00000469756/ENSG00000242111, intron 1 of 3)	full_rescue	NA
chr9-1041001-1042000	-40.4558	group_1	ENSG00000286684	NA	Promoter (<=1kb)	full_rescue	CGI_only
chr9-103155001-103156000	-58.5714	group_3	ENSG00000225564	LINC01492	Intron (ENST00000411575/ENSG00000225564, intron 8 of 9)	full_rescue	NA
chr9-102067001-102068000	-51.3889	group_3	ENSG00000230418	ARL2BPP7	Distal Intergenic	full_rescue	NA
chr9-101737001-101738000	-46.8855	group_1	ENSG00000198785	GRIN3A	Promoter (<=1kb)	full_rescue	CGI_only
chr9-101632001-101633000	-31.8182	group_4	ENSG00000198785	GRIN3A	Intron (ENST00000361820/ENSG00000198785, intron 3 of 8)	full_rescue	NA
chr9-100799001-100800000	-25.6684	group_4	ENSG00000237999	ACTG1P19	Distal Intergenic	full_rescue	NA
chr9-10001-11000	-82.2968	group_2	ENSG00000236875	DDX11L5	Promoter (1-2kb)	no_rescue	NA
chr8-9982001-9983000	-33.3333	group_4	ENSG00000260093	RP11-1E4.1	Downstream (1-2kb)	full_rescue	NA
chr8-99028001-99029000	-25.8621	group_4	ENSG00000132549	VPS13B	Intron (ENST00000355155/ENSG00000132549, intron 2 of 17)	full_rescue	NA
chr8-9897001-9898000	-27.1439	group_2	ENSG00000284321	NA	Downstream (1-2kb)	full_rescue	CGI_only
chr8-98873001-98874000	-31.6987	group_3	ENSG00000104375	STK3	Intron (ENST00000523601/ENSG00000104375, intron 3 of 12)	full_rescue	NA
chr8-9885001-9886000	-25.2233	group_4	ENSG00000284321	NA	Distal Intergenic	full_rescue	NA
chr8-9839001-9840000	-40.3252	group_4	ENSG00000284321	NA	Distal Intergenic	full_rescue	NA
chr8-98365001-98366000	-100	group_2	ENSG00000278914	KB-1517D11.3	Distal Intergenic	full_rescue	NA
chr8-97798001-97799000	-62.5	group_4	ENSG00000104341	LAPTM4B	Intron (ENST00000619747/ENSG00000104341, intron 1 of 6)	full_rescue	GH_only
chr8-97560001-97561000	-28.547	group_1	ENSG00000213750	KB-1683C8.1	Distal Intergenic	full_rescue	NA
chr8-97487001-97488000	-27.5862	group_4	ENSG00000207215	U3	Distal Intergenic	full_rescue	NA
chr8-97295001-97296000	-27.9205	group_3	ENSG00000180543	TSPYL5	Distal Intergenic	full_rescue	NA
chr8-97278001-97279000	-82.4054	group_1	ENSG00000180543	TSPYL5	Promoter (<=1kb)	no_rescue	CGI_and_GH
chr8-97277001-97278000	-80.5938	group_2	ENSG00000180543	TSPYL5	Promoter (<=1kb)	no_rescue	CGI_and_GH
chr8-97009001-97010000	-30.6288	group_4	ENSG00000104324	CPQ	Intron (ENST00000220763/ENSG00000104324, intron 5 of 7)	full_rescue	NA
chr8-96682001-96683000	-49.0278	group_3	ENSG00000104324	CPQ	Intron (ENST00000220763/ENSG00000104324, intron 1 of 7)	no_rescue	NA
chr8-96361001-96362000	-26.208	group_4	ENSG00000253105	KB-1448A5.1	Distal Intergenic	full_rescue	NA
chr8-96124001-96125000	-34.6801	group_2	ENSG00000271349	RP11-44N17.2	Downstream (1-2kb)	partial_rescue	NA
chr8-95861001-95862000	-25.2252	group_4	ENSG00000254079	RP11-31K23.1	Distal Intergenic	full_rescue	NA
chr8-95294001-95295000	-29.701	group_4	ENSG00000253773	C8orf37-AS1	Intron (ENST00000517655/ENSG00000253773, intron 2 of 2)	full_rescue	NA
chr8-95073001-95074000	-56.9382	group_4	ENSG00000245080	MIR3150B	Promoter (<=1kb)	full_rescue	CGI_and_GH
chr8-94997001-94998000	-33.8469	group_4	ENSG00000156170	NDUFAF6	Intron (ENST00000523378/ENSG00000156170, intron 3 of 7)	full_rescue	NA
chr8-94727001-94728000	-33.3333	group_4	ENSG00000156162	DPY19L4	Intron (ENST00000522422/ENSG00000156162, intron 2 of 3)	full_rescue	NA
chr8-94614001-94615000	-27.8022	group_4	ENSG00000254283	RP11-267M23.7	Distal Intergenic	full_rescue	NA
chr8-946001-947000	-36.2179	group_3	ENSG00000198010	DLGAP2	Intron (ENST00000637795/ENSG00000198010, intron 2 of 14)	full_rescue	NA
chr8-94590001-94591000	-49.5908	group_4	ENSG00000254190	RP11-267M23.5	Promoter (<=1kb)	partial_rescue	NA
chr8-94546001-94547000	-33.5043	group_3	ENSG00000164944	KIAA1429	Intron (ENST00000297591/ENSG00000164944, intron 1 of 23)	partial_rescue	NA
chr8-9453001-9454000	-33.3333	group_4	ENSG00000249050	RP11-375N15.1	Promoter (<=1kb)	full_rescue	NA
chr8-94303001-94304000	-28.5577	group_4	ENSG00000164949	GEM	Distal Intergenic	full_rescue	NA
chr8-94261001-94262000	-33.4661	group_2	ENSG00000164949	GEM	Promoter (<=1kb)	full_rescue	CGI_and_GH
chr8-9416001-9417000	-38.0531	group_4	ENSG00000248538	RP11-10A14.5	Intron (ENST00000650282/ENSG00000248538, intron 3 of 3)	full_rescue	NA
chr8-94120001-94121000	-46.8041	group_3	ENSG00000253585	KB-1184D12.1	Distal Intergenic	full_rescue	NA
chr8-94088001-94089000	-33.0317	group_3	ENSG00000253585	KB-1184D12.1	Distal Intergenic	partial_rescue	NA
chr8-93810001-93811000	-60	group_4	ENSG00000164953	TMEM67	Intron (ENST00000409623/ENSG00000164953, intron 27 of 28)	full_rescue	NA
chr8-93797001-93798000	-40.2597	group_4	ENSG00000164953	TMEM67	Exon (ENST00000409623/ENSG00000164953, exon 20 of 29)	full_rescue	NA
chr8-93770001-93771000	-31.5789	group_4	ENSG00000164953	TMEM67	Intron (ENST00000452276/ENSG00000164953, intron 7 of 14)	full_rescue	NA
chr8-93757001-93758000	-65.625	group_4	ENSG00000164953	TMEM67	Exon (ENST00000481620/ENSG00000164953, exon 2 of 2)	full_rescue	NA
chr8-93603001-93604000	-31.1237	group_2	ENSG00000246662	LINC00535	Intron (ENST00000501400/ENSG00000246662, intron 5 of 10)	full_rescue	NA
chr8-9338001-9339000	-36.3214	group_1	ENSG00000248538	RP11-10A14.5	Intron (ENST00000520255/ENSG00000248538, intron 2 of 3)	full_rescue	NA
chr8-92369001-92370000	-44.0337	group_2	ENSG00000253118	RP11-700E23.3	Distal Intergenic	no_rescue	NA
chr8-92189001-92190000	-44.5314	group_4	ENSG00000233778	RP11-777J24.1	Distal Intergenic	full_rescue	NA
chr8-92172001-92173000	-39.985	group_3	ENSG00000233778	RP11-777J24.1	Distal Intergenic	partial_rescue	NA
chr8-92050001-92051000	-30.8532	group_3	ENSG00000079102	RUNX1T1	Intron (ENST00000613886/ENSG00000079102, intron 2 of 11)	full_rescue	NA
chr8-91609001-91610000	-31.0345	group_4	ENSG00000253901	RP11-122C21.1	Intron (ENST00000521199/ENSG00000253901, intron 2 of 3)	full_rescue	NA
chr8-90792001-90793000	-27.7715	group_2	ENSG00000123119	NECAB1	Promoter (<=1kb)	full_rescue	CGI_only
chr8-90751001-90752000	-28.9863	group_3	ENSG00000180694	TMEM64	Intron (ENST00000519519/ENSG00000180694, intron 1 of 5)	no_rescue	NA
chr8-90419001-90420000	-39.8325	group_4	ENSG00000253394	LINC00534	Intron (ENST00000655523/ENSG00000253394, intron 2 of 2)	full_rescue	NA
chr8-89824001-89825000	-52.59	group_3	ENSG00000253349	COX6B1P6	Promoter (<=1kb)	full_rescue	NA
chr8-89601001-89602000	-58.0805	group_4	ENSG00000251136	RP11-37B2.1	Intron (ENST00000661105/ENSG00000251136, intron 1 of 2)	full_rescue	NA
chr8-89597001-89598000	-31.8182	group_4	ENSG00000251136	RP11-37B2.1	Exon (ENST00000658265/ENSG00000251136, exon 1 of 2)	full_rescue	NA
chr8-8934001-8935000	-48	group_4	ENSG00000270966	RP11-62H7.3	Promoter (<=1kb)	full_rescue	GH_only
chr8-89236001-89237000	-63.6574	group_3	ENSG00000253621	RPSAP74	Distal Intergenic	full_rescue	NA
chr8-88149001-88150000	-30.1854	group_3	ENSG00000156103	MMP16	Intron (ENST00000286614/ENSG00000156103, intron 4 of 9)	full_rescue	NA
chr8-88148001-88149000	-34.5841	group_3	ENSG00000156103	MMP16	Intron (ENST00000286614/ENSG00000156103, intron 4 of 9)	full_rescue	NA
chr8-87994001-87995000	-39.1304	group_4	ENSG00000253171	CTB-118P15.2	Intron (ENST00000518129/ENSG00000253171, intron 1 of 5)	full_rescue	NA
chr8-87955001-87956000	-28.0702	group_4	ENSG00000253171	CTB-118P15.2	Distal Intergenic	full_rescue	NA
chr8-87711001-87712000	-57.7922	group_2	ENSG00000253500	AF121898.3	Intron (ENST00000440763/ENSG00000253500, intron 2 of 3)	full_rescue	NA
chr8-8722001-8723000	-70.6712	group_2	ENSG00000284717	NA	Downstream (<1kb)	no_rescue	CGI_only
chr8-8713001-8714000	-27.7778	group_4	ENSG00000284717	NA	Downstream (<1kb)	full_rescue	NA
chr8-8703001-8704000	-60.0402	group_4	ENSG00000253958	CLDN23	3' UTR	full_rescue	CGI_and_GH
chr8-8702001-8703000	-44.4902	group_1	ENSG00000253958	CLDN23	Promoter (<=1kb)	full_rescue	CGI_and_GH
chr8-86609001-86610000	-25.4079	group_4	ENSG00000170289	CNGB3	Intron (ENST00000681746/ENSG00000170289, intron 14 of 18)	full_rescue	NA
chr8-86344001-86345000	-34.2678	group_3	ENSG00000123124	WWP1	Intron (ENST00000517970/ENSG00000123124, intron 1 of 24)	full_rescue	CGI_and_GH
chr8-85836001-85837000	-42.5236	group_2	ENSG00000253154	CTA-392E5.1	Intron (ENST00000648211/ENSG00000253154, intron 1 of 2)	partial_rescue	NA
chr8-85651001-85652000	-25.782	group_4	ENSG00000270971	REXO1L8P	Downstream (2-3kb)	full_rescue	NA
chr8-85547001-85548000	-61.1111	group_4	ENSG00000254380	RP11-317J10.4	Distal Intergenic	full_rescue	NA
chr8-85061001-85062000	-29.5455	group_4	ENSG00000253283	RP11-146E23.2	Distal Intergenic	full_rescue	NA
chr8-842001-843000	-62.5	group_4	ENSG00000198010	DLGAP2	Intron (ENST00000637795/ENSG00000198010, intron 1 of 14)	full_rescue	CGI_only
chr8-84141001-84142000	-40.875	group_4	ENSG00000254202	RP11-120I21.2	Exon (ENST00000666702/ENSG00000254202, exon 4 of 4)	full_rescue	NA
chr8-83193001-83194000	-39.2338	group_4	ENSG00000253423	RP11-813B8.1	Distal Intergenic	full_rescue	NA
[truncated: 21,255 more rows]

## Sheet: GO-BP_promoter_hypoDMR_genes
PANTHER GO-Slim Biological Process	REFLIST	OBSERVED	EXPECTED	OVER/UNDER	FOLD_ENRICHMENT	RAW P_VALUE	FDR
[truncated: 97 more rows]

[truncated: 3 more sheets: GO-BP_genebody_hypoDMR_genes, pR_all_hypodmr_dec_dnmt3b, pG_all_hypodmr_dec_dnmt3b]
