# Supplementary material for: The aberrant epigenome of DNMT3B -mutated ICF1 patient iPSCs is amenable to correction, with the exception of a subset of regions with H3K4me3- and/or CTCF-based epigenetic memory
Source: HighWire-hosted journal article supplement (doi:10.1101/gr.276986.122), 2023-02-01
Supplement: Supplemental_Table_S4.xlsx [file Supplemental_Table_S4.xlsx]

## Sheet: Legend
Supplemental_Table_S4
pR_WT1_iPSCs pp > 0.8	Genes that are differentially expressed (DE; pp > 0.9) and genes with pp > 0.8 obtained from RNA-seq data analysis of pR iPSCs compared to WT1. Log2FC and posterior probability for both ICF1 and the corresponding corrected clones compared with WT1 are provided for the listed genes.
pG_WT1_iPSCs pp > 0.8	Genes that are differentially expressed (DE; pp > 0.9) and genes with pp > 0.8 obtained from RNA-seq data analysis of pG iPSCs compared to WT1. Log2FC and posterior probability for both ICF1 and the corresponding corrected clones compared with WT1 are provided for the listed genes.
pR_pG_WT1_HPCs pp > 0.95	Genes that are differentially expressed in both ICF1 hematopoietic progenitor cells (HPCs) compared to WT1 HPCs (pp > 0.95 and |Log2 FC| > 1.2).

## Sheet:  pR_WT1_iPSCs pp > 0.8
ENSG	genes	log2FC_pR_WT1	Posterior_probability_pR	log2FC_cR7_WT1	Posterior_probability_cR7	log2FC_cR35_WT1	Posterior_probability_cR35
ENSG00000185847	LINC01405	1.64312	0.899983	1.42266	0.861047	1.83354	0.919946
ENSG00000149257	SERPINH1	-0.389377	0.899968	-0.0610606	0.266969	-0.300403	0.833522
ENSG00000196935	SRGAP1	-0.95362	0.899849	-0.366875	0.718103	-0.40723	0.763559
ENSG00000031081	ARHGAP31	-0.902721	0.89981	-1.16901	0.912667	-1.1889	0.922403
ENSG00000169758	TMEM266	-2.20021	0.899802	-2.00334	0.885608	-1.32314	0.868697
ENSG00000179041	RRS1	0.553471	0.899596	0.464306	0.854677	-0.281151	0.696505
ENSG00000221914	PPP2R2A	0.430523	0.899335	0.13992	0.501616	0.330061	0.835205
ENSG00000025039	RRAGD	-0.623596	0.899248	-0.486627	0.850694	-0.134395	0.442812
ENSG00000100714	MTHFD1	0.397927	0.899122	0.610367	0.961869	0.555422	0.953461
ENSG00000271430	NA	0.634095	0.898924	0.610155	0.884526	0.753094	0.926133
ENSG00000160191	PDE9A	-0.788233	0.898798	-0.310577	0.689787	-0.548198	0.850062
ENSG00000172139	SLC9C1	-1.85069	0.898727	-2.06717	0.895724	-1.59763	0.891891
ENSG00000135390	ATP5MC2	-0.410013	0.898569	-0.241565	0.730186	-0.207152	0.697026
ENSG00000204592	HLA-E	-0.708996	0.898411	-0.697099	0.888035	0.011534	0.0515651
ENSG00000115828	QPCT	1.88328	0.898237	1.60982	0.853618	2.31532	0.935798
ENSG00000112685	EXOC2	-0.419182	0.898189	-0.223462	0.689787	-0.260077	0.769138
ENSG00000113248	PCDHB15	-1.96626	0.898142	-0.804043	0.803879	-1.19619	0.864903
ENSG00000152128	TMEM163	-2.3749	0.898063	-2.06426	0.881949	-1.84784	0.886818
ENSG00000184860	SDR42E1	2.59001	0.898063	-0.266659	0.255068	-0.337897	0.297821
ENSG00000137970	RPL7P9	0.41925	0.898008	-0.0262383	0.136243	-0.0752345	0.339421
ENSG00000178585	CTNNBIP1	-0.694973	0.897802	-0.480345	0.828179	-0.240336	0.640885
ENSG00000128607	KLHDC10	-0.611085	0.897565	-0.62458	0.892634	-0.0650877	0.259201
ENSG00000235655	H3P6	-0.571371	0.89751	-0.443173	0.841962	-0.321512	0.769755
ENSG00000090776	EFNB1	-1.02506	0.897478	-1.09636	0.894317	-1.04821	0.900647
ENSG00000135686	KLHL36	-0.532028	0.897399	-0.419206	0.843756	0.292603	0.769518
ENSG00000137275	RIPK1	0.714201	0.897391	1.03952	0.94133	0.462122	0.806882
ENSG00000141447	OSBPL1A	-0.460327	0.897131	-0.405627	0.867108	-0.010947	0.0621706
ENSG00000157483	MYO1E	0.481799	0.896996	0.849032	0.965197	0.858348	0.968539
ENSG00000137801	THBS1	0.487673	0.89698	1.52847	0.990683	1.58969	0.992311
ENSG00000149531	FRG1BP	-1.9503	0.896972	-2.14814	0.892863	-1.95972	0.898561
ENSG00000102226	USP11	0.449683	0.896901	0.0467982	0.20159	-0.140812	0.503631
ENSG00000008988	RPS20	0.382484	0.896783	0.032595	0.149337	0.0273131	0.160456
ENSG00000092847	AGO1	-0.398207	0.896767	0.132703	0.494859	0.260152	0.781719
ENSG00000112576	CCND3	-0.888529	0.896648	-0.86991	0.885411	-0.418684	0.77482
ENSG00000133874	RNF122	-0.900746	0.896625	-1.00457	0.897937	-0.673653	0.864097
ENSG00000147416	ATP6V1B2	0.44232	0.896411	0.36899	0.848671	0.0512116	0.219924
ENSG00000165731	RET	-1.64886	0.896245	-1.33983	0.871589	-0.55569	0.768617
ENSG00000070718	AP3M2	0.596344	0.896214	-0.00647166	0.0396083	0.287276	0.70308
ENSG00000170540	ARL6IP1	-0.385633	0.895993	-0.460056	0.925865	-0.621502	0.964533
ENSG00000072818	ACAP1	0.989674	0.895969	0.500442	0.731047	0.315018	0.605671
ENSG00000142173	COL6A2	-0.456014	0.895811	-0.666808	0.943037	-0.404235	0.869605
ENSG00000188883	KLRG2	1.15662	0.895692	0.94671	0.847747	1.14744	0.89574
ENSG00000169895	SYAP1	0.457505	0.895621	0.452327	0.885948	0.574617	0.933001
ENSG00000054523	KIF1B	-0.392653	0.895574	-0.35291	0.864643	0.121116	0.494093
ENSG00000136810	TXN	0.403214	0.895574	0.285153	0.799113	0.365351	0.877303
ENSG00000188177	ZC3H6	-1.31757	0.895447	-1.72253	0.903793	0.190901	0.497033
ENSG00000107201	DDX58	-0.498104	0.895345	-0.982249	0.958661	-0.588919	0.920831
ENSG00000182983	ZNF662	2.41834	0.895305	-0.14702	0.183817	-0.230453	0.2557
ENSG00000136830	NIBAN2	0.46184	0.895242	0.391414	0.85052	0.449706	0.891243
ENSG00000079739	PGM1	-0.555665	0.895171	-0.319646	0.75489	0.26931	0.733165
ENSG00000179950	PUF60	0.414992	0.895131	0.25502	0.751136	-0.211181	0.683102
ENSG00000070214	SLC44A1	-0.401146	0.895068	-0.109414	0.431946	-0.0613504	0.279202
ENSG00000149418	ST14	-0.552679	0.894973	-0.315076	0.755522	-0.684903	0.923439
ENSG00000180592	SKIDA1	-0.883959	0.894847	-1.23955	0.914082	-0.135583	0.412316
ENSG00000078668	VDAC3	0.406722	0.894831	0.0382047	0.179502	-0.0164544	0.104521
ENSG00000204516	MICB	-0.726999	0.894799	-1.57054	0.9428	-0.405326	0.793376
ENSG00000171490	RSL1D1	0.386987	0.89472	0.434768	0.913054	0.0705271	0.320281
ENSG00000177707	NECTIN3	0.413461	0.894388	-0.101407	0.389003	-0.379155	0.869408
ENSG00000171126	KCNG3	-0.619559	0.894246	-0.932535	0.929587	-0.335487	0.767534
ENSG00000137962	ARHGAP29	-1.03928	0.894199	-0.60842	0.815345	0.23762	0.60319
ENSG00000135506	OS9	-0.435316	0.894104	-0.525153	0.9214	-0.592103	0.939584
ENSG00000075340	ADD2	-0.390831	0.894064	0.260874	0.77034	-0.269348	0.794135
ENSG00000141401	IMPA2	-0.493543	0.894056	-0.325792	0.789733	-0.110761	0.417207
ENSG00000267383	AC011447.3	-0.452945	0.894025	-0.32902	0.810248	-0.501224	0.912659
ENSG00000051596	THOC3	0.554154	0.89393	0.506682	0.8694	0.309273	0.744466
ENSG00000136944	LMX1B	-2.58244	0.893914	-2.60065	0.884534	-1.56121	0.866365
ENSG00000104368	PLAT	1.86974	0.893819	0.991333	0.721074	0.793746	0.676827
ENSG00000134352	IL6ST	0.585595	0.893788	0.220975	0.583978	0.525117	0.874553
ENSG00000196155	PLEKHG4	1.40834	0.893732	0.571631	0.664831	0.852358	0.786429
ENSG00000166851	PLK1	-0.458667	0.893709	0.225054	0.687338	-0.073333	0.296762
ENSG00000214776	AC092821.2	-2.56486	0.893693	-2.65401	0.885324	-2.59114	0.895368
ENSG00000102230	PCYT1B	0.510596	0.89359	0.749365	0.944626	0.450109	0.868523
ENSG00000102098	SCML2	0.621732	0.893582	0.325853	0.715274	0.559399	0.875477
ENSG00000144820	ADGRG7	2.12185	0.893535	1.97481	0.866444	1.69201	0.840484
ENSG00000183741	CBX6	0.527583	0.893511	0.215256	0.606825	0.314608	0.756636
ENSG00000159335	PTMS	-0.617384	0.893472	0.05542	0.213831	0.882063	0.962565
ENSG00000164118	CEP44	-0.558274	0.893456	-0.742667	0.922261	-0.402403	0.83025
ENSG00000104343	UBE2W	0.448702	0.893306	-0.273247	0.721904	0.0265081	0.133587
ENSG00000177189	RPS6KA3	0.524582	0.89325	-0.567618	0.868159	0.307815	0.757221
ENSG00000140416	TPM1	0.381137	0.89325	0.970438	0.991181	0.706314	0.977122
ENSG00000130635	COL5A1	-0.825896	0.893179	-0.875194	0.890247	-0.169639	0.486664
ENSG00000143971	ETAA1	0.46465	0.893084	-0.0718421	0.264867	0.441284	0.884439
ENSG00000119514	GALNT12	-0.943488	0.893037	-0.690885	0.845708	-0.0515391	0.170809
ENSG00000181192	DHTKD1	-0.428341	0.892934	-0.612134	0.941899	0.111697	0.443926
ENSG00000255666	LINC02700	0.975283	0.89291	1.42231	0.93877	1.12393	0.915741
ENSG00000149485	FADS1	0.385156	0.892808	0.566751	0.954228	0.0587548	0.278768
ENSG00000101194	SLC17A9	0.950569	0.892476	0.686986	0.817408	1.57708	0.957167
ENSG00000108370	RGS9	1.17305	0.892405	0.836198	0.812303	1.50392	0.931065
ENSG00000196604	POTEF	2.411	0.892262	1.8414	0.80655	1.79174	0.813488
ENSG00000268089	GABRQ	-0.954106	0.892136	-0.362504	0.701096	-0.243697	0.591011
ENSG00000117155	SSX2IP	0.477988	0.892081	0.343232	0.795897	0.180359	0.579315
ENSG00000197747	S100A10	0.457062	0.891867	0.455779	0.885695	0.27944	0.757071
ENSG00000178662	CSRNP3	-0.797608	0.89178	-0.839467	0.888422	-0.237537	0.61027
ENSG00000006283	CACNA1G	-1.70341	0.891614	-1.5724	0.876141	-0.805171	0.821375
ENSG00000275464	FP565260.1	-0.648993	0.891575	-0.776973	0.904923	-0.849836	0.921882
ENSG00000074964	ARHGEF10L	-0.589391	0.891567	-0.393889	0.799248	-0.430058	0.835561
ENSG00000136156	ITM2B	0.39507	0.891551	0.356788	0.860375	0.230635	0.725618
ENSG00000140443	IGF1R	-0.392611	0.891188	0.173958	0.599278	0.2694	0.793992
ENSG00000144642	RBMS3	-1.4187	0.891156	-1.21698	0.868499	-0.982908	0.860185
ENSG00000137312	FLOT1	-0.4997	0.891053	-0.297365	0.751926	-0.206852	0.642656
ENSG00000166949	SMAD3	-0.709834	0.891006	-0.666487	0.874039	-0.127398	0.411035
ENSG00000143842	SOX13	-0.44351	0.890982	-0.186121	0.610168	-0.292937	0.785805
ENSG00000146833	TRIM4	1.35383	0.890951	1.11737	0.841013	1.42533	0.900892
ENSG00000253729	PRKDC	0.367183	0.890951	-0.0591544	0.268344	0.129261	0.528564
ENSG00000213445	SIPA1	0.629199	0.8908	0.055962	0.188748	0.508596	0.849651
ENSG00000197498	RPF2	0.423302	0.890737	0.172161	0.571136	-0.0780147	0.331313
ENSG00000086666	ZFAND6	-0.402284	0.890714	-0.339324	0.844222	-0.0698708	0.31463
ENSG00000180304	OAZ2	-0.402547	0.890603	0.0918631	0.366069	-0.119477	0.483045
ENSG00000044446	PHKA2	0.535902	0.890469	0.0783143	0.269601	0.174867	0.527719
ENSG00000197971	MBP	-0.661511	0.890437	-0.708337	0.890793	-0.371781	0.777563
ENSG00000164830	OXR1	0.508615	0.890413	-0.23264	0.617422	0.0809919	0.294636
ENSG00000076248	UNG	0.392713	0.890413	0.539522	0.945195	0.336645	0.856803
ENSG00000219438	TAFA5	-0.88786	0.890255	-0.894778	0.881365	-1.0172	0.904211
ENSG00000183765	CHEK2	-0.462167	0.8902	-0.328398	0.799722	-0.00298725	0.0201835
ENSG00000245910	SNHG6	0.415006	0.890081	-0.00660775	0.0522764	-0.249675	0.731545
ENSG00000163762	TM4SF18	1.41783	0.889797	0.495518	0.617193	0.155691	0.308047
ENSG00000180190	TDRP	0.426787	0.889773	0.630891	0.947147	0.505614	0.921613
ENSG00000188322	SBK1	-0.570574	0.889749	-0.059199	0.218968	-0.305878	0.749026
ENSG00000106268	NUDT1	-0.732972	0.889678	-0.420111	0.778566	-0.20529	0.571705
ENSG00000129951	PLPPR3	-0.697835	0.889607	-1.04195	0.920206	0.238039	0.648124
ENSG00000135842	NIBAN1	0.751565	0.88956	1.16937	0.942832	0.500719	0.805088
ENSG00000172037	LAMB2	0.440917	0.889528	0.191806	0.599618	0.345926	0.833379
ENSG00000143376	SNX27	-0.427156	0.889433	-0.0451297	0.209501	0.0787053	0.339223
ENSG00000115648	MLPH	1.08726	0.889402	0.756991	0.802812	0.52135	0.722188
ENSG00000127399	LRRC61	2.23748	0.889331	2.53337	0.907594	2.52269	0.915907
ENSG00000139832	RAB20	1.15322	0.889315	1.0632	0.86356	1.35171	0.915489
ENSG00000174173	TRMT10C	0.430242	0.889283	0.245263	0.712626	0.127961	0.483313
ENSG00000117602	RCAN3	-0.585688	0.889204	-0.469321	0.839852	-0.290137	0.723421
ENSG00000116990	MYCL	-0.718734	0.889204	-0.821701	0.895779	-0.0475649	0.179162
ENSG00000198626	RYR2	-0.484687	0.888951	0.200043	0.618371	-0.193071	0.612444
ENSG00000120539	MASTL	0.413001	0.888928	0.144168	0.502217	0.117068	0.467721
ENSG00000099250	NRP1	1.43261	0.888809	1.02641	0.803894	0.340842	0.519871
ENSG00000143198	MGST3	-0.479769	0.888746	-0.398846	0.842452	-0.369347	0.832953
ENSG00000160194	NDUFV3	0.514389	0.888698	0.413609	0.830068	0.416993	0.845684
ENSG00000204179	PTPN20	2.57394	0.888611	0.395655	0.360426	0.261324	0.275101
ENSG00000230316	FEZF1-AS1	-1.50904	0.888374	-2.51271	0.905895	-2.37635	0.913347
ENSG00000104660	LEPROTL1	0.444346	0.888343	-0.146392	0.496859	-0.081437	0.319159
ENSG00000198417	MT1F	-1.79716	0.888161	-1.37281	0.857649	-1.92206	0.893298
ENSG00000237440	ZNF737	-0.563855	0.888129	-0.795985	0.924031	-0.381667	0.810122
ENSG00000101665	SMAD7	-0.707855	0.888027	-0.444714	0.793921	-0.401254	0.784707
ENSG00000013810	TACC3	-0.407678	0.887932	-0.0413679	0.180988	-0.405008	0.88854
ENSG00000116962	NID1	-0.477105	0.88779	-0.681549	0.931175	-0.521777	0.902765
ENSG00000120318	ARAP3	-0.532651	0.88779	-0.228387	0.639487	-0.100849	0.368495
ENSG00000110768	GTF2H1	0.493072	0.88779	0.309027	0.750828	-0.0734998	0.265112
ENSG00000110002	VWA5A	0.570133	0.887718	0.328555	0.731087	0.309271	0.727309
ENSG00000205609	EIF3CL	0.916438	0.887679	-0.170486	0.377283	-0.224659	0.467634
ENSG00000260266	PPIAP46	-2.21764	0.887505	-1.70532	0.86047	-1.48992	0.86326
ENSG00000154473	BUB3	-0.379577	0.887426	-0.0937144	0.37134	-0.395237	0.899098
ENSG00000095015	MAP3K1	-0.446805	0.887197	-0.33533	0.810604	-0.306775	0.795691
ENSG00000135097	MSI1	-0.839511	0.886952	-0.413445	0.747864	-0.390722	0.749879
ENSG00000101928	MOSPD1	0.60324	0.886889	-0.00626582	0.0385968	0.0262242	0.105248
ENSG00000198948	MFAP3L	-0.775818	0.886802	-1.27884	0.920981	-0.474873	0.807822
ENSG00000240184	PCDHGC3	-2.27846	0.886802	-1.1305	0.820166	-0.944188	0.813504
ENSG00000142871	CCN1	0.720548	0.886786	1.67968	0.973597	1.94487	0.98263
ENSG00000138376	BARD1	-0.427426	0.886659	-0.501007	0.908779	-0.272029	0.761979
ENSG00000081803	CADPS2	0.445557	0.88662	0.0749566	0.268368	-0.229114	0.671753
ENSG00000108950	FAM20A	-1.91652	0.886573	-1.99423	0.878844	-1.4421	0.868278
ENSG00000151322	NPAS3	-2.26128	0.886509	-2.24146	0.875746	-1.74569	0.872656
ENSG00000189057	FAM111B	0.430745	0.886462	0.108357	0.399371	-0.217469	0.668189
ENSG00000137075	RNF38	-0.437659	0.886312	-0.102431	0.378089	-0.00322723	0.0209738
ENSG00000185947	ZNF267	0.443963	0.886312	-0.0204361	0.0911893	0.08976	0.35254
ENSG00000197965	MPZL1	0.393185	0.886256	0.378921	0.87505	0.497675	0.93225
ENSG00000112984	KIF20A	-0.399141	0.886201	0.109911	0.426343	-0.144245	0.535938
ENSG00000002549	LAP3	0.451146	0.886185	0.222351	0.646402	0.147373	0.518662
ENSG00000125868	DSTN	0.377626	0.886138	0.42411	0.905033	-0.219835	0.713954
ENSG00000196547	MAN2A2	-0.755544	0.88613	-1.21777	0.91978	-0.938418	0.909079
ENSG00000075618	FSCN1	-0.366187	0.88609	-0.0580402	0.265657	-0.0724165	0.32443
ENSG00000189046	ALKBH2	1.02974	0.886067	0.977142	0.865741	1.03822	0.888825
ENSG00000142227	EMP3	1.6023	0.885964	0.869639	0.723967	1.28704	0.839702
ENSG00000136986	DERL1	0.437212	0.88583	0.0987723	0.364654	-0.170666	0.565912
ENSG00000185630	PBX1	-0.383124	0.885822	0.201298	0.664973	-0.163267	0.598171
ENSG00000164742	ADCY1	-0.463919	0.885798	-0.0844551	0.307905	-0.192022	0.617651
ENSG00000138166	DUSP5	-0.462371	0.885648	-0.574091	0.915085	-0.647584	0.935838
ENSG00000213225	NOC2LP1	1.96782	0.885593	1.60956	0.824189	1.10779	0.736943
ENSG00000148634	HERC4	0.418866	0.885593	-0.220642	0.655901	0.29003	0.785536
ENSG00000241945	PWP2	1.92162	0.885561	2.09204	0.894459	1.92544	0.887513
ENSG00000255302	EID1	0.37764	0.885498	0.0561762	0.258979	0.121062	0.486854
ENSG00000185008	ROBO2	-1.09491	0.885466	-1.27172	0.887845	-0.708145	0.836785
ENSG00000139636	LMBR1L	-0.651966	0.885348	-0.62093	0.869432	-0.130843	0.419175
ENSG00000040275	SPDL1	0.418572	0.885276	0.205523	0.645572	0.138359	0.512798
ENSG00000022267	FHL1	0.52908	0.88519	0.0385029	0.145378	0.523973	0.883585
ENSG00000226792	C13orf42	-0.777636	0.885158	-0.933182	0.894744	-1.14436	0.92042
ENSG00000214485	RPL7P1	0.413183	0.885126	0.000419644	0.0125969	-0.0527207	0.222667
ENSG00000135047	CTSL	0.5438	0.884984	0.43376	0.82426	0.352129	0.777081
ENSG00000171295	ZNF440	-0.955481	0.884897	-1.03852	0.882763	0.100218	0.309533
ENSG00000147649	MTDH	0.377126	0.884502	-0.400338	0.886446	-0.406156	0.896
ENSG00000120992	LYPLA1	0.36744	0.884486	-0.48438	0.929927	-0.112537	0.461131
ENSG00000148730	EIF4EBP2	-0.36662	0.884391	-0.0189935	0.106291	0.0609561	0.283944
ENSG00000173930	SLCO4C1	-0.753926	0.88421	-0.237068	0.589289	-0.616506	0.859063
ENSG00000102038	SMARCA1	0.377019	0.883791	-0.147087	0.539897	0.0380511	0.196161
ENSG00000118965	WDR35	0.420422	0.883783	0.316462	0.800338	0.347797	0.838453
ENSG00000164114	MAP9	0.489346	0.883735	0.100879	0.340638	0.227245	0.654652
ENSG00000125676	THOC2	0.3815	0.883625	0.0184436	0.102	0.113293	0.453931
ENSG00000166130	IKBIP	0.826564	0.883277	0.524603	0.76834	1.13649	0.930954
ENSG00000074590	NUAK1	0.561442	0.883277	1.02597	0.957073	0.773599	0.933609
ENSG00000196498	NCOR2	-0.512649	0.882977	0.476906	0.887955	0.212729	0.643643
ENSG00000275835	TUBGCP5	0.636463	0.882977	0.512017	0.825342	0.60199	0.873636
ENSG00000115946	PNO1	0.434305	0.882945	0.322162	0.792515	-0.147947	0.519105
ENSG00000107341	UBE2R2	-0.44456	0.882882	-0.0546663	0.208276	-0.0902492	0.362039
ENSG00000146223	RPL7L1	0.368905	0.882874	0.285863	0.806826	-0.0871891	0.392219
ENSG00000230798	FOXD3-AS1	-0.467277	0.882661	-0.0322844	0.129905	-0.0540816	0.214195
ENSG00000104549	SQLE	0.365926	0.882653	0.069723	0.299726	-0.616488	0.960755
ENSG00000171681	ATF7IP	-0.370904	0.882534	0.0100349	0.0640751	0.517027	0.947265
ENSG00000104413	ESRP1	0.36933	0.882321	0.0589436	0.262054	-0.180506	0.641257
ENSG00000253305	PCDHGB6	-2.11471	0.882163	-0.673792	0.745549	-1.04428	0.824963
ENSG00000126787	DLGAP5	-0.374244	0.882115	-0.179592	0.622638	0.0322262	0.157532
ENSG00000124145	SDC4	-0.388791	0.882115	-0.737462	0.966161	-0.180416	0.63209
ENSG00000145220	LYAR	0.449432	0.882092	0.478919	0.888904	0.209235	0.643114
ENSG00000182534	MXRA7	-0.881786	0.88206	-1.01566	0.886185	-0.344563	0.699437
ENSG00000100029	PES1	0.392891	0.881894	0.418592	0.893772	-0.12526	0.49802
ENSG00000196208	GREB1	-0.487528	0.881878	-0.327096	0.775666	0.0439098	0.176791
ENSG00000129474	AJUBA	0.466615	0.881618	0.912655	0.965149	0.666536	0.939908
ENSG00000159182	PRAC1	-2.45693	0.88157	-2.45693	0.870973	-2.20477	0.877445
ENSG00000182473	EXOC7	-0.392476	0.881515	-0.0197304	0.10189	-0.403967	0.888161
ENSG00000171291	ZNF439	-1.75192	0.881475	-1.42521	0.855033	-0.841149	0.81092
ENSG00000008311	AASS	0.364302	0.881459	0.191214	0.650195	0.207601	0.708967
ENSG00000183742	MACC1	0.402898	0.881428	-0.149847	0.518836	-0.193894	0.632177
ENSG00000101210	EEF1A2	-0.872573	0.881365	-1.56284	0.917361	0.505317	0.845178
ENSG00000176293	ZNF135	-1.03198	0.881357	-0.687207	0.819542	-0.317541	0.656019
ENSG00000115365	LANCL1	0.422589	0.881349	0.456646	0.894262	0.787616	0.967907
ENSG00000136802	LRRC8A	0.372525	0.881317	0.498167	0.937102	-0.232165	0.732802
ENSG00000111276	CDKN1B	-0.525644	0.881112	-0.866456	0.93323	-0.186651	0.581094
ENSG00000235173	HGH1	0.59004	0.881088	0.183729	0.492188	-0.411412	0.758983
ENSG00000179046	TRIML2	-0.410177	0.881025	-0.652986	0.946562	-0.785501	0.964517
ENSG00000182957	SPATA13	0.468048	0.880867	0.480547	0.878551	0.436238	0.867163
ENSG00000271533	Z83843.1	0.626768	0.880685	0.481446	0.810841	0.922038	0.937727
ENSG00000156642	NPTN	-0.395538	0.880614	-0.309517	0.804463	-0.292491	0.796727
ENSG00000101972	STAG2	0.35679	0.880598	-0.044858	0.189736	-0.158537	0.603
ENSG00000130723	PRRC2B	-0.366211	0.88059	0.111282	0.436253	0.0153921	0.111792
ENSG00000136045	PWP1	0.387594	0.880464	0.332785	0.829333	0.0697887	0.305202
ENSG00000134909	ARHGAP32	-0.504572	0.880416	-0.159712	0.507701	0.0943627	0.346249
ENSG00000124302	CHST8	-1.07581	0.880321	-1.00627	0.863015	-0.914823	0.865164
ENSG00000106052	TAX1BP1	-0.387595	0.880219	-0.287273	0.789654	-0.127032	0.507045
ENSG00000100297	MCM5	0.35912	0.880219	0.536601	0.952299	-0.159066	0.602455
ENSG00000206573	THUMPD3-AS1	0.582213	0.880195	0.69709	0.904069	0.368806	0.76872
ENSG00000188559	RALGAPA2	-0.438747	0.880116	-0.0396172	0.170137	-0.660096	0.940263
ENSG00000198369	SPRED2	-0.709649	0.879974	-0.520834	0.818744	-0.145883	0.445618
ENSG00000132361	CLUH	0.398188	0.879958	0.244886	0.708446	0.108032	0.433495
ENSG00000164754	RAD21	0.362838	0.879729	0.0843654	0.33871	0.208583	0.70692
ENSG00000253953	PCDHGB4	-2.11106	0.879689	-0.0859513	0.225211	-0.579833	0.730723
ENSG00000101079	NDRG3	-0.593018	0.87965	-0.393192	0.783411	0.132827	0.437407
ENSG00000183087	GAS6	-0.695101	0.879642	-0.682771	0.866855	-0.678423	0.877563
ENSG00000166501	PRKCB	1.12558	0.879602	1.01942	0.848782	2.43459	0.975241
ENSG00000164933	SLC25A32	0.474671	0.879571	-0.0165944	0.0811291	-0.284967	0.715376
ENSG00000109956	B3GAT1	-0.632004	0.879508	-0.139779	0.422739	-0.385133	0.784043
ENSG00000104613	INTS10	0.462759	0.879476	0.425175	0.85493	0.223783	0.652052
ENSG00000137804	NUSAP1	-0.376232	0.879357	-0.233134	0.710698	0.00181719	0.021116
ENSG00000186834	HEXIM1	0.601556	0.87931	0.638264	0.882084	0.66219	0.897652
ENSG00000175175	PPM1E	-0.635708	0.878986	-0.523622	0.835568	-0.00950185	0.0481433
ENSG00000127329	PTPRB	-1.90296	0.878978	-2.19284	0.876647	-2.12019	0.886707
ENSG00000109787	KLF3	0.539629	0.878907	0.49759	0.852717	0.511225	0.868625
ENSG00000197444	OGDHL	-0.547148	0.87882	-1.00958	0.937055	-0.512226	0.867717
ENSG00000006459	KDM7A	-0.456008	0.878662	-0.801627	0.944918	-0.117575	0.441666
ENSG00000112584	FAM120B	-0.573524	0.878654	-0.383076	0.781372	-0.514643	0.860976
ENSG00000165140	FBP1	-1.93613	0.878575	-1.93634	0.867796	-1.36962	0.854567
ENSG00000151474	FRMD4A	0.506645	0.878512	0.351527	0.769881	-0.0131953	0.0528691
ENSG00000074219	TEAD2	-0.390399	0.878504	0.056864	0.25438	-0.0422371	0.194644
ENSG00000157637	SLC38A10	-0.486861	0.878464	-0.581136	0.899928	-0.785328	0.940216
ENSG00000280079	AC011447.7	-0.412124	0.878441	-0.156753	0.546638	-0.517591	0.92121
ENSG00000242715	CCDC169	0.513407	0.878401	0.261932	0.663614	0.974543	0.963371
ENSG00000144136	SLC20A1	0.368193	0.878259	0.158206	0.569722	-0.0170017	0.10897
ENSG00000113643	RARS1	0.368246	0.877927	0.125534	0.488276	0.00413781	0.0232418
ENSG00000065308	TRAM2	0.526046	0.877864	0.858642	0.944191	0.25144	0.659046
ENSG00000137819	PAQR5	0.652514	0.877864	-0.102326	0.283849	0.454141	0.796118
ENSG00000112715	VEGFA	0.520053	0.877801	-0.154928	0.443626	0.1196	0.393934
ENSG00000184702	SEPTIN5	-1.20362	0.877674	-1.34955	0.876749	-0.834406	0.840302
ENSG00000213064	SFT2D2	-0.400575	0.877508	-0.3693	0.851658	-0.138707	0.524945
ENSG00000261115	TMEM178B	-0.494208	0.877366	-0.0873937	0.320486	-0.645633	0.919606
ENSG00000099219	ERMP1	-0.457013	0.877358	-0.566812	0.907183	-0.127391	0.467729
ENSG00000108439	PNPO	1.29942	0.877334	0.632713	0.690206	1.21378	0.865109
ENSG00000176623	RMDN1	0.447507	0.877239	-0.241229	0.652629	-0.0917804	0.335454
ENSG00000130021	PUDP	0.652856	0.877152	0.986069	0.932045	0.621644	0.869313
ENSG00000153936	HS2ST1	-0.415915	0.877121	-0.50627	0.90761	-0.271655	0.757103
ENSG00000037280	FLT4	-0.900003	0.877002	-1.07121	0.883894	-0.74386	0.85557
ENSG00000253250	C8orf88	1.23714	0.876963	0.671657	0.720023	1.36491	0.896016
ENSG00000089682	RBM41	0.456958	0.8769	0.271829	0.706478	0.528942	0.905934
ENSG00000121570	DPPA4	-0.353339	0.876876	-0.368485	0.886889	-0.217574	0.729562
ENSG00000065150	IPO5	0.349392	0.876844	0.259612	0.777247	0.268978	0.802504
ENSG00000196159	FAT4	-0.464448	0.876836	-0.26133	0.703159	-0.200747	0.626218
ENSG00000131238	PPT1	0.371178	0.876686	0.235476	0.727989	0.27308	0.786943
ENSG00000167680	SEMA6B	0.475574	0.876639	0.371201	0.801856	0.816841	0.955555
ENSG00000114738	MAPKAPK3	0.42217	0.876307	0.236665	0.685251	0.353088	0.830613
ENSG00000132623	ANKEF1	0.610526	0.876291	0.387668	0.751176	-0.178087	0.47741
ENSG00000175040	CHST2	0.535387	0.87622	-0.420319	0.770166	-0.169723	0.491619
ENSG00000122068	FYTTD1	-0.423554	0.876062	-0.76031	0.951959	-0.784171	0.957626
ENSG00000137267	TUBB2A	0.366771	0.87588	0.835621	0.981911	0.464281	0.921273
ENSG00000115159	GPD2	0.390236	0.875793	0.438178	0.897328	0.524184	0.931262
ENSG00000275126	H4C13	-0.372982	0.875785	-0.342594	0.848015	-0.261804	0.774939
ENSG00000197256	KANK2	0.506268	0.875667	0.580231	0.894001	0.601652	0.908005
ENSG00000197705	KLHL14	-1.77944	0.875611	-1.48431	0.850797	-1.44079	0.861592
ENSG00000196663	TECPR2	-0.497131	0.875604	-0.526801	0.878061	-0.433275	0.848576
ENSG00000147251	DOCK11	-0.528687	0.875548	-0.774643	0.91816	-0.26704	0.701855
ENSG00000168214	RBPJ	-0.360868	0.875525	-0.123448	0.46739	0.0668647	0.321727
ENSG00000126217	MCF2L	-0.721228	0.875453	-0.7309	0.866998	-0.273839	0.647943
ENSG00000182916	TCEAL7	1.1637	0.875351	0.385995	0.579347	0.978204	0.841496
ENSG00000185920	PTCH1	-0.438235	0.875343	0.0552558	0.235627	-0.0985678	0.386893
ENSG00000099864	PALM	-1.41376	0.875319	-1.16264	0.846514	0.394997	0.717945
ENSG00000147813	NAPRT	-0.864764	0.875311	-1.49649	0.910763	-1.03739	0.89442
ENSG00000095002	MSH2	-0.3514	0.875287	-0.320138	0.845012	-0.313572	0.843274
ENSG00000281566	AL157778.1	-0.866654	0.875256	-0.272709	0.601301	0.0889416	0.282158
ENSG00000111726	CMAS	-0.4401	0.87524	-0.177786	0.571595	-0.0810458	0.323323
ENSG00000134330	IAH1	-0.76675	0.875201	-1.09564	0.901137	-0.540978	0.823059
ENSG00000172123	SLFN12	0.871345	0.875145	1.47799	0.943978	1.78348	0.96609
ENSG00000145675	PIK3R1	-0.613969	0.875137	-0.437763	0.800939	-0.0755756	0.276065
ENSG00000065675	PRKCQ	-0.674211	0.875066	-0.516377	0.820443	-0.572069	0.851405
ENSG00000213722	DDAH2	-0.536042	0.875027	-0.259834	0.66615	-0.000525669	0.0105738
ENSG00000011028	MRC2	-0.572753	0.874924	-0.715743	0.897763	-0.630197	0.890911
ENSG00000147679	UTP23	0.523676	0.874813	-0.0837866	0.263168	0.0120147	0.0498819
ENSG00000100439	ABHD4	-0.713317	0.874782	-0.168274	0.465564	-0.425833	0.783197
ENSG00000065268	WDR18	0.482921	0.874718	0.747247	0.939853	0.31916	0.7654
ENSG00000130779	CLIP1	-0.419075	0.874703	-0.614741	0.930583	-0.901072	0.965726
ENSG00000140948	ZCCHC14	-0.513765	0.874687	-0.226488	0.630233	0.194571	0.596694
ENSG00000171806	METTL18	1.22471	0.874608	1.14688	0.849904	1.0072	0.835268
ENSG00000065809	FAM107B	-0.466717	0.874584	-0.377844	0.817779	-0.476014	0.87976
ENSG00000003402	CFLAR	-0.721552	0.874576	-0.737775	0.86744	-1.47878	0.934091
ENSG00000186297	GABRA5	-0.546024	0.874323	-0.828672	0.918673	-0.71544	0.911893
ENSG00000108797	CNTNAP1	-1.95857	0.874315	-2.28096	0.872221	-1.42089	0.852101
ENSG00000123352	SPATS2	-0.577821	0.874292	-0.459261	0.820253	-0.131109	0.425442
ENSG00000104763	ASAH1	0.408528	0.874284	-0.233174	0.664649	0.0412901	0.179565
ENSG00000066735	KIF26A	0.400648	0.874268	0.685524	0.956203	0.0613579	0.256751
ENSG00000164574	GALNT10	-0.81623	0.874236	-0.474918	0.768546	0.0469065	0.166652
ENSG00000137812	KNL1	-0.383237	0.874197	-0.163142	0.561779	-0.252724	0.752408
ENSG00000132688	NES	0.352441	0.874181	0.248684	0.758975	0.315076	0.850576
ENSG00000135766	EGLN1	-0.684426	0.874165	-1.26806	0.922822	-0.896576	0.905555
ENSG00000183049	CAMK1D	-1.0996	0.874157	-0.810914	0.827832	-0.289644	0.610397
ENSG00000010404	IDS	0.75871	0.874134	0.159948	0.391721	0.527153	0.795565
ENSG00000114790	ARHGEF26	-0.587685	0.87407	-0.670474	0.883822	-0.178402	0.533883
ENSG00000171867	PRNP	0.443295	0.873818	-0.142766	0.45714	-0.642588	0.913568
ENSG00000088832	FKBP1A	0.381175	0.873723	0.385007	0.873754	-0.0839203	0.340401
ENSG00000134954	ETS1	0.54968	0.87362	1.02457	0.95358	0.55794	0.878093
ENSG00000075043	KCNQ2	-0.619918	0.873343	-0.245246	0.62116	0.684736	0.92562
ENSG00000173848	NET1	0.366941	0.873083	0.531926	0.938778	0.780556	0.977288
ENSG00000170915	PAQR8	-0.82097	0.873019	-1.28297	0.903824	0.350136	0.739211
ENSG00000225366	TDGF1P3	0.770716	0.872972	1.15708	0.927595	1.14705	0.933839
ENSG00000204959	ARHGEF34P	-1.04113	0.872869	-1.00715	0.858123	-1.07537	0.877397
ENSG00000184428	TOP1MT	0.504274	0.872806	0.240495	0.629695	0.357433	0.788168
ENSG00000213719	CLIC1	0.357666	0.872751	0.495852	0.935435	0.0583542	0.277472
ENSG00000003989	SLC7A2	0.391627	0.872743	-0.446795	0.883735	-0.0347018	0.144991
ENSG00000146776	ATXN7L1	-0.520488	0.872537	-0.420045	0.818491	-0.692042	0.914027
ENSG00000168610	STAT3	-0.380492	0.87245	-0.166482	0.5819	-0.287601	0.799911
ENSG00000105559	PLEKHA4	1.17812	0.872395	0.166335	0.331834	0.774913	0.779649
ENSG00000105810	CDK6	-0.365941	0.872387	-0.230676	0.709829	-0.362286	0.866579
ENSG00000128739	SNRPN	0.39225	0.872356	0.561888	0.935482	0.599161	0.947131
ENSG00000104231	ZFAND1	0.441717	0.872316	-0.220007	0.618473	-0.125716	0.446005
ENSG00000014216	CAPN1	-0.380671	0.872253	-0.0661267	0.289302	-0.190995	0.648022
ENSG00000151229	SLC2A13	-0.608602	0.872245	-0.593329	0.85821	-0.085874	0.303598
ENSG00000171456	ASXL1	-0.51561	0.872174	-0.285238	0.707821	0.256489	0.707426
ENSG00000169446	MMGT1	0.455675	0.872024	0.00572767	0.0427852	-0.0809619	0.294368
ENSG00000067840	PDZD4	0.374355	0.872	0.798246	0.97709	0.571224	0.948901
ENSG00000152503	TRIM36	-0.585844	0.871889	-0.801349	0.902552	-0.557051	0.865235
ENSG00000164199	ADGRV1	-0.35362	0.87185	-0.122167	0.469737	-0.22994	0.741092
ENSG00000132294	EFR3A	0.367217	0.871818	0.13013	0.482191	-0.230875	0.718435
ENSG00000280623	PCAT14	-0.678442	0.871794	-2.17069	0.945037	-2.34168	0.952797
ENSG00000162344	FGF19	-0.79846	0.871708	-0.680586	0.838753	-1.08534	0.902773
ENSG00000115233	PSMD14	0.362929	0.87166	0.392464	0.886667	0.161888	0.593777
ENSG00000159111	MRPL10	0.427593	0.87151	0.342599	0.79909	0.436409	0.877224
ENSG00000160201	U2AF1	-1.04218	0.871502	-0.0112316	0.0412284	-1.5848	0.904622
ENSG00000095777	MYO3A	-0.867539	0.871391	-0.674555	0.825603	-0.508089	0.788729
ENSG00000103460	TOX3	-0.875864	0.871249	-0.760728	0.842389	-0.176576	0.471839
ENSG00000183856	IQGAP3	-0.418812	0.871233	-0.434226	0.870001	-0.534015	0.914271
ENSG00000166197	NOLC1	0.35335	0.871044	0.305364	0.829681	-0.0126919	0.0694173
ENSG00000113430	IRX4	-2.07691	0.871036	-2.10765	0.860707	-1.20204	0.82814
ENSG00000156535	CD109	0.619184	0.871036	-0.0429412	0.131264	0.43726	0.790902
ENSG00000093010	COMT	1.08612	0.870925	1.05743	0.854156	0.703739	0.775144
ENSG00000183837	PNMA3	1.22113	0.870854	0.731219	0.737591	0.922953	0.811046
ENSG00000119778	ATAD2B	-0.405669	0.870728	-0.21054	0.644457	-0.320709	0.808636
ENSG00000107554	DNMBP	0.459487	0.870664	0.395204	0.826757	0.428518	0.856582
ENSG00000147536	GINS4	0.385389	0.87057	0.0601017	0.243727	-0.0478245	0.21768
ENSG00000122756	CNTFR	-2.11658	0.87053	-2.03072	0.856653	-1.11462	0.817803
ENSG00000175324	LSM1	0.492188	0.870364	0.0911411	0.299829	0.171324	0.523372
ENSG00000010810	FYN	0.474228	0.870293	0.96754	0.963814	0.80434	0.951762
ENSG00000142798	HSPG2	-0.423942	0.870119	-0.238611	0.686729	0.592637	0.9425
ENSG00000064999	ANKS1A	-0.441522	0.869748	-0.180041	0.566181	-0.0400929	0.176428
ENSG00000135069	PSAT1	0.353796	0.86959	0.609698	0.962952	0.270541	0.794443
ENSG00000267194	NA	-0.884761	0.869566	-0.430084	0.728645	0.230952	0.57896
ENSG00000143147	GPR161	-0.521918	0.869542	-0.608708	0.886217	-0.515872	0.870064
ENSG00000238178	AC078993.1	2.05608	0.869202	-0.116713	0.163452	0.474198	0.467279
ENSG00000074935	TUBE1	-0.58485	0.869044	-0.958525	0.917796	-0.52017	0.851058
ENSG00000180530	NRIP1	0.402987	0.868942	0.140956	0.483203	0.179152	0.599878
ENSG00000213214	ARHGEF35	-1.11811	0.868847	-1.07922	0.853919	-1.08992	0.867891
ENSG00000189319	FAM53B	-0.564005	0.868705	-0.500185	0.837307	-0.387496	0.793178
ENSG00000243716	NPIPB5	0.576941	0.868657	0.172295	0.461154	-0.230932	0.567288
ENSG00000173898	SPTBN2	-0.39074	0.868586	-0.353877	0.833506	-0.533586	0.925596
ENSG00000007402	CACNA2D2	-0.834544	0.868333	-0.864461	0.861308	-0.134504	0.376825
ENSG00000104980	TIMM44	0.401538	0.86827	0.499887	0.908597	0.246211	0.724038
ENSG00000146083	RNF44	-0.440921	0.868254	0.0761705	0.299908	-0.145492	0.517192
ENSG00000147677	EIF3H	0.345029	0.868254	-0.00831454	0.0621706	0.0183789	0.111879
ENSG00000144395	CCDC150	-0.410955	0.868128	-0.998533	0.966453	-0.647671	0.940319
ENSG00000128294	TPST2	0.408831	0.867646	0.177521	0.568584	0.167371	0.569421
ENSG00000212907	MT-ND4L	-0.440953	0.867551	0.178795	0.572717	0.250977	0.72139
ENSG00000127616	SMARCA4	-0.350563	0.867527	0.149673	0.551474	-0.0633591	0.282253
ENSG00000143190	POU2F1	-0.350043	0.867432	0.227377	0.721983	0.215494	0.722165
ENSG00000176049	JAKMIP2	-0.678497	0.867322	0.164709	0.461138	0.108572	0.351639
ENSG00000158089	GALNT14	1.25718	0.867314	1.16643	0.839828	1.04522	0.829317
ENSG00000162174	ASRGL1	-0.640711	0.867148	-0.469596	0.798315	0.198313	0.566553
ENSG00000154277	UCHL1	0.337557	0.86714	0.589306	0.962731	0.09202	0.398265
ENSG00000165626	BEND7	-1.22937	0.8671	-1.43691	0.869345	-0.403731	0.683339
ENSG00000163535	SGO2	-0.387636	0.867092	-0.485116	0.906811	-0.218128	0.690609
ENSG00000248124	RRN3P1	0.773593	0.867037	0.323452	0.613613	-0.183343	0.418527
ENSG00000131203	IDO1	0.757962	0.867021	1.22194	0.932558	1.85321	0.974071
ENSG00000118922	KLF12	-0.474053	0.86699	-0.0850836	0.317033	-0.264592	0.707347
ENSG00000169398	PTK2	0.345804	0.866958	0.0129479	0.0636879	0.257091	0.779499
ENSG00000179542	SLITRK4	0.616235	0.866934	-0.533037	0.767937	0.618086	0.868855
ENSG00000166250	CLMP	0.498881	0.866918	0.486151	0.852678	0.16508	0.510277
ENSG00000177873	ZNF619	1.01096	0.866903	0.893292	0.829159	1.04585	0.875256
ENSG00000165512	ZNF22	0.37756	0.866753	0.194291	0.614838	0.180889	0.614814
ENSG00000039068	CDH1	-0.335166	0.866697	-0.326604	0.852709	0.0403768	0.204727
ENSG00000185728	YTHDF3	0.346617	0.866674	0.171294	0.596425	-0.00991405	0.0671493
ENSG00000198420	TCAF1	-0.64902	0.866666	0.0463281	0.167537	0.203537	0.567224
ENSG00000081320	STK17B	-0.548997	0.866547	-0.690704	0.891148	-0.0981885	0.342385
ENSG00000049239	H6PD	-0.906978	0.866539	-1.05092	0.871265	-0.371282	0.698662
ENSG00000213949	ITGA1	-0.68033	0.866539	-0.498637	0.800662	-0.287645	0.667739
ENSG00000108175	ZMIZ1	-0.518316	0.86646	-0.0794171	0.276942	-0.191941	0.570362
ENSG00000167508	MVD	0.398822	0.866429	0.761694	0.9613	-0.533617	0.904741
ENSG00000010278	CD9	-0.358999	0.86631	-0.590134	0.949035	-0.33246	0.844538
ENSG00000169718	DUS1L	0.434489	0.866247	0.0179492	0.0844404	-0.268962	0.709836
ENSG00000170881	RNF139	0.466681	0.866215	0.14435	0.442686	-0.216	0.609022
ENSG00000163625	WDFY3	-0.354479	0.866112	-0.181827	0.619967	-0.459513	0.923202
ENSG00000114631	PODXL2	0.532007	0.866033	0.337458	0.729854	0.57666	0.884462
ENSG00000166619	BLCAP	-0.444191	0.865939	-0.0695168	0.264322	-0.0170375	0.0924537
ENSG00000078674	PCM1	0.338811	0.865796	0.0413468	0.189262	-0.217891	0.72339
ENSG00000110723	EXPH5	-0.498959	0.865765	-0.737298	0.913845	-0.716398	0.918547
ENSG00000154760	SLFN13	0.668417	0.865591	0.794548	0.88726	1.95111	0.981492
ENSG00000049323	LTBP1	-0.377533	0.865512	-0.24859	0.725476	-0.0470254	0.226001
ENSG00000004455	AK2	0.367094	0.865291	0.0729185	0.286307	0.15622	0.576044
ENSG00000142687	KIAA0319L	-0.38725	0.865196	-0.274323	0.746545	-0.086954	0.368321
ENSG00000173262	SLC2A14	-1.44769	0.865172	0.00935938	0.0364394	-0.924771	0.820743
ENSG00000162851	TFB2M	0.511926	0.865093	0.394178	0.786556	-0.143084	0.427765
ENSG00000122550	KLHL7	-0.35536	0.865006	-0.118579	0.457946	-0.44367	0.90919
ENSG00000226278	PSPHP1	2.40549	0.865006	2.26868	0.836043	2.3905	0.864848
ENSG00000187231	SESTD1	-0.403842	0.86484	-0.258451	0.723627	-0.294152	0.778313
ENSG00000121957	GPSM2	-0.709127	0.864832	-0.543052	0.808755	-0.0739315	0.234426
ENSG00000013573	DDX11	0.381961	0.864816	0.150999	0.519089	-0.037294	0.180727
ENSG00000203995	ZYG11A	-1.65982	0.864801	-2.26876	0.873707	-0.386632	0.638941
ENSG00000171310	CHST11	-0.644109	0.864398	-0.691642	0.864421	-0.285907	0.673871
ENSG00000184384	MAML2	-0.591553	0.864358	-0.647401	0.868444	-0.574497	0.86062
ENSG00000187672	ERC2	-0.505388	0.86435	-0.739689	0.910225	-0.36134	0.787504
ENSG00000159167	STC1	0.678117	0.864271	0.703125	0.86047	0.323239	0.660792
ENSG00000197860	SGTB	0.44759	0.8642	-0.0626488	0.217008	-0.254344	0.669896
ENSG00000197355	UAP1L1	-1.31622	0.864184	-2.27719	0.889939	-0.749268	0.798939
ENSG00000145725	PPIP5K2	0.363328	0.864113	0.216226	0.685883	0.368733	0.871281
ENSG00000135090	TAOK3	-0.732786	0.864042	-0.693738	0.845012	-0.630377	0.843858
ENSG00000121578	B4GALT4	0.4069	0.863994	0.182498	0.56679	0.484555	0.89958
ENSG00000198689	SLC9A6	0.470345	0.863844	0.0849629	0.275883	-0.0550232	0.214487
ENSG00000251095	AC093866.1	1.10777	0.863631	0.48067	0.63955	2.30737	0.967796
ENSG00000174720	LARP7	-0.415955	0.863584	-0.762619	0.943527	0.04587	0.211144
ENSG00000066382	MPPED2	1.17789	0.863552	1.30276	0.872735	0.47149	0.633362
ENSG00000156140	ADAMTS3	-0.877347	0.863536	-1.28817	0.889228	-0.657421	0.825911
ENSG00000123728	RAP2C	0.406491	0.863536	0.410067	0.856566	0.304135	0.777428
ENSG00000185442	FAM174B	0.786644	0.863489	0.837708	0.864816	0.0298269	0.087396
ENSG00000132386	SERPINF1	0.959913	0.863489	0.838891	0.822995	0.991799	0.871384
ENSG00000165349	SLC7A3	0.360699	0.863323	0.822103	0.97811	0.974362	0.986771
ENSG00000188321	ZNF559	-0.504797	0.863267	-0.565682	0.87618	-0.224768	0.628692
ENSG00000125731	SH2D3A	0.718154	0.863109	0.521503	0.775382	0.152422	0.386418
ENSG00000125630	POLR1B	0.355818	0.863086	0.166254	0.58205	-0.00881552	0.0626921
ENSG00000196376	SLC35F1	-0.588489	0.863078	-0.785049	0.892199	-0.358808	0.755569
ENSG00000136159	NUDT15	0.375101	0.862825	0.487486	0.912146	0.258933	0.749342
ENSG00000137720	C11orf1	0.843704	0.862809	0.504051	0.725097	0.396787	0.67301
ENSG00000130338	TULP4	-0.392904	0.862722	-0.260271	0.728787	-0.112845	0.432586
ENSG00000122674	CCZ1	-0.484939	0.862651	-0.708031	0.912723	-0.574368	0.893029
ENSG00000105499	PLA2G4C	1.93772	0.862509	1.6827	0.811971	1.01201	0.681276
ENSG00000104472	CHRAC1	0.534415	0.862406	0.264282	0.632106	0.172788	0.493208
ENSG00000178222	RNF212	1.8542	0.862335	0.279483	0.358048	0.450875	0.481575
ENSG00000204116	CHIC1	0.468595	0.862082	0.450237	0.843068	0.535565	0.891717
ENSG00000198105	ZNF248	1.73205	0.862019	1.37212	0.787741	2.7079	0.948285
ENSG00000197261	C6orf141	-1.30345	0.861932	-0.759365	0.783537	-1.10046	0.847415
ENSG00000161016	RPL8	0.33112	0.861916	0.0618329	0.268044	-0.00859766	0.0707766
ENSG00000173621	LRFN4	0.509503	0.861884	0.318325	0.715534	0.101587	0.329187
ENSG00000059804	SLC2A3	0.326559	0.861884	-0.028864	0.149163	0.20573	0.712033
ENSG00000143434	SEMA6C	-0.699013	0.861821	-1.30026	0.912043	-0.602428	0.84031
ENSG00000104960	PTOV1	-0.40462	0.861821	-0.0988617	0.371846	-0.109537	0.423901
ENSG00000082898	XPO1	0.330437	0.861742	0.0724642	0.305645	0.224569	0.729364
ENSG00000114115	RBP1	-0.676361	0.861639	-0.25124	0.595152	-0.00949309	0.044508
ENSG00000153093	ACOXL	1.01746	0.861632	1.24243	0.888588	0.484399	0.678708
ENSG00000172554	SNTG2	-0.741205	0.861497	-0.168659	0.448194	-0.413574	0.750962
ENSG00000074181	NOTCH3	-0.370015	0.861481	-0.0129663	0.0612222	0.102006	0.413564
ENSG00000064042	LIMCH1	1.64745	0.861466	2.13164	0.906732	1.76816	0.878883
ENSG00000118762	PKD2	-0.383222	0.861236	-0.137582	0.496377	-0.477816	0.908629
ENSG00000187605	TET3	-0.44369	0.861197	0.428329	0.869384	0.0289572	0.13207
ENSG00000169139	UBE2V2	0.357205	0.860968	-0.0292753	0.13742	0.0913122	0.377978
ENSG00000164171	ITGA2	-0.546732	0.860952	-0.989958	0.921826	-0.3843	0.783687
ENSG00000175895	PLEKHF2	0.589607	0.860857	-0.217935	0.516465	-0.0603162	0.188598
ENSG00000095587	TLL2	-1.76245	0.860857	-1.45594	0.833229	-1.03098	0.81111
ENSG00000237190	CDKN2AIPNL	0.453825	0.86077	0.383519	0.806874	0.392417	0.826196
ENSG00000187764	SEMA4D	-0.456165	0.860731	-0.296095	0.733537	0.0549539	0.20762
ENSG00000135297	MTO1	0.443435	0.860644	0.0835834	0.282601	0.316372	0.771161
ENSG00000123636	BAZ2B	-0.346036	0.860486	-0.250387	0.744158	-0.551555	0.944231
ENSG00000112679	DUSP22	-0.586454	0.86047	-0.321257	0.700709	0.060398	0.215017
ENSG00000097021	ACOT7	0.385171	0.860383	0.349429	0.822679	0.340629	0.825248
ENSG00000163808	KIF15	-0.382755	0.860375	-0.214705	0.652818	-0.201754	0.654209
ENSG00000249859	PVT1	0.464861	0.860343	0.173204	0.507899	0.287909	0.725974
ENSG00000166922	SCG5	0.824956	0.860209	0.757704	0.830677	0.794016	0.854124
ENSG00000131979	GCH1	-0.767299	0.860177	-0.927921	0.871376	-0.483878	0.781214
ENSG00000144485	HES6	-0.637853	0.859869	-0.728709	0.86842	-0.756257	0.884233
ENSG00000164332	UBLCP1	0.402853	0.85983	0.151989	0.49787	0.259737	0.728432
ENSG00000183196	CHST6	-0.440549	0.859727	-0.524855	0.884676	-0.23213	0.670102
ENSG00000065526	SPEN	-0.361099	0.859522	0.0431265	0.182679	0.0750145	0.346115
ENSG00000225733	FGD5-AS1	0.358668	0.859498	0.219356	0.680644	0.314076	0.819463
ENSG00000105146	AURKC	1.424	0.859387	-0.0457001	0.0966896	-0.0101689	0.0265136
ENSG00000012174	MBTPS2	0.667179	0.859379	-0.0677337	0.193537	-0.0430827	0.127953
ENSG00000138606	SHF	-0.670353	0.859379	-0.446757	0.770182	-0.528977	0.821502
ENSG00000152219	ARL14EP	0.450292	0.85934	0.435308	0.843779	0.352395	0.793992
ENSG00000128536	CDHR3	-1.14726	0.859229	-1.18916	0.850773	-0.378536	0.665779
ENSG00000184058	TBX1	-2.21476	0.859166	-2.39701	0.851888	-1.60927	0.837655
ENSG00000177683	THAP5	0.440797	0.859158	-0.313247	0.722797	0.167848	0.53789
ENSG00000234449	NA	-1.49123	0.859142	-1.58133	0.85214	-1.30375	0.849027
ENSG00000164976	MYORG	-0.98606	0.859071	-0.772172	0.815448	-0.064821	0.18486
ENSG00000075275	CELSR1	-0.53254	0.859024	-0.535792	0.851247	-0.0379428	0.154403
ENSG00000120949	TNFRSF8	-0.465326	0.858834	-0.179554	0.540695	-0.553612	0.889259
ENSG00000112293	GPLD1	-0.949611	0.858834	-1.03101	0.856187	-1.3329	0.891385
ENSG00000120733	KDM3B	-0.339791	0.858763	0.0411663	0.187507	-0.0463784	0.239381
ENSG00000156162	DPY19L4	0.409462	0.858739	-0.342193	0.775579	-0.0750034	0.300935
ENSG00000011426	ANLN	-0.338082	0.8587	-0.395578	0.89363	-0.414865	0.90256
ENSG00000185432	METTL7A	-0.673043	0.858494	-0.351487	0.701491	-1.40352	0.927161
ENSG00000135968	GCC2	0.355761	0.858447	0.255282	0.744348	0.436181	0.90463
ENSG00000196535	MYO18A	-0.399439	0.858312	-0.285106	0.754329	-0.261699	0.734856
ENSG00000133056	PIK3C2B	-0.565672	0.858305	-0.223424	0.577561	-0.00955067	0.0474399
ENSG00000206120	EGFEM1P	-1.28598	0.858194	-1.02699	0.822221	-0.73867	0.791922
ENSG00000065621	GSTO2	0.49534	0.858036	-0.541971	0.824196	0.0452821	0.173899
ENSG00000061918	GUCY1B1	-1.76148	0.858028	-1.72894	0.844736	-0.844863	0.780708
ENSG00000168116	KIAA1586	0.440435	0.858012	0.0641848	0.218968	0.460533	0.869455
ENSG00000105429	MEGF8	-0.392773	0.858012	-0.335358	0.811252	-0.234399	0.69739
ENSG00000205181	LINC00654	2.17381	0.857981	2.17926	0.846869	1.962	0.830495
ENSG00000091409	ITGA6	0.325447	0.857902	0.0747355	0.302966	0.225961	0.741558
ENSG00000232389	AL583856.1	1.14352	0.857751	0.152368	0.297782	0.484137	0.640229
ENSG00000197183	NOL4L	-0.796287	0.857704	-0.44603	0.738626	0.338617	0.716009
ENSG00000203880	PCMTD2	-0.366497	0.857562	-0.365067	0.849983	0.357058	0.860746
ENSG00000167657	DAPK3	0.453092	0.857498	0.782347	0.942792	0.395234	0.828227
ENSG00000158966	CACHD1	0.365321	0.857388	0.615937	0.9474	0.358397	0.851469
ENSG00000188002	AC026412.1	1.65025	0.85734	1.55387	0.830187	1.81031	0.880163
ENSG00000111799	COL12A1	0.39637	0.857285	0.438459	0.872838	-1.31158	0.967156
ENSG00000182218	HHIPL1	1.12959	0.85723	0.82732	0.770735	0.637324	0.720497
ENSG00000168209	DDIT4	0.857403	0.857088	-0.0191902	0.0575001	0.949455	0.877895
ENSG00000134780	DAGLA	1.4712	0.85704	1.84494	0.894934	0.67865	0.657892
ENSG00000064313	TAF2	0.369454	0.857032	-0.154848	0.51445	-0.0444109	0.184939
ENSG00000181007	ZFP82	0.44828	0.856945	-0.0844288	0.274374	0.285766	0.728993
ENSG00000086061	DNAJA1	0.326759	0.856803	0.433015	0.915994	-0.0737849	0.322707
ENSG00000234444	ZNF736	1.58163	0.856756	2.11499	0.908866	-0.244587	0.340512
ENSG00000166833	NAV2	0.364184	0.856716	0.797396	0.97268	0.577617	0.945724
ENSG00000154118	JPH3	-0.571467	0.856653	-0.341963	0.721493	-0.0881679	0.301717
ENSG00000154767	XPC	0.40144	0.856416	0.427106	0.865646	0.521608	0.911853
ENSG00000121753	ADGRB2	-0.659996	0.856234	-1.2056	0.90923	-0.395146	0.75519
ENSG00000184363	PKP3	1.40061	0.856218	1.28947	0.82422	0.938831	0.759418
ENSG00000107104	KANK1	0.413927	0.856202	0.736949	0.949178	0.641585	0.937434
ENSG00000180884	ZNF792	-0.647603	0.856195	-0.683894	0.852954	-0.385237	0.750923
ENSG00000130821	SLC6A8	-0.39762	0.855934	-0.264095	0.715115	-0.280822	0.757348
ENSG00000105889	STEAP1B	1.22685	0.855926	0.857857	0.756739	0.69406	0.717747
ENSG00000177082	WDR73	0.442406	0.855878	0.417916	0.834114	-0.497956	0.85414
ENSG00000198189	HSD17B11	-0.713163	0.855697	-0.804456	0.860533	-0.229012	0.569469
ENSG00000008735	MAPK8IP2	-1.87289	0.855602	-1.54856	0.827942	-0.809939	0.766341
ENSG00000241973	PI4KA	-0.455305	0.855491	-0.129277	0.426691	-0.194534	0.585898
ENSG00000146112	PPP1R18	-0.628523	0.855483	-0.890103	0.889038	-0.390747	0.757284
ENSG00000113441	LNPEP	-0.433652	0.855436	-0.788434	0.935712	0.0920029	0.348019
ENSG00000147789	ZNF7	0.47029	0.855309	0.0526097	0.177621	-0.0665122	0.242076
ENSG00000198576	ARC	0.994098	0.855294	0.239563	0.447396	-0.112894	0.244683
ENSG00000090097	PCBP4	-0.995443	0.855238	-0.727683	0.80146	-0.309199	0.619588
ENSG00000135596	MICAL1	-0.41621	0.855238	-0.479975	0.875303	-0.255943	0.718601
ENSG00000064763	FAR2	-0.450078	0.85523	-0.228586	0.63744	-0.508796	0.88014
ENSG00000166405	RIC3	0.548509	0.855159	0.312875	0.676629	0.318342	0.703095
ENSG00000140463	BBS4	-0.463614	0.855151	-0.374074	0.792198	-0.327647	0.771865
ENSG00000065923	SLC9A7	-0.376971	0.85508	-0.545374	0.91955	-0.262033	0.745628
ENSG00000123560	PLP1	0.427709	0.854954	0.576133	0.908431	0.927757	0.966429
ENSG00000215866	LINC01356	1.02923	0.854922	0.715845	0.756518	0.831308	0.809087
ENSG00000140320	BAHD1	-0.418491	0.85478	-0.226794	0.653056	-0.454753	0.87117
ENSG00000100528	CNIH1	0.374838	0.854677	0.382894	0.854037	0.291381	0.78424
ENSG00000125733	TRIP10	0.431558	0.854519	0.117289	0.393341	0.601384	0.92004
ENSG00000271860	AL589740.1	-1.62992	0.854503	-1.83045	0.851666	-1.46925	0.847984
ENSG00000084636	COL16A1	0.747949	0.854448	-0.0161163	0.0575001	0.274078	0.566205
ENSG00000007062	PROM1	-0.338247	0.854424	-0.377634	0.876979	-0.729197	0.970713
ENSG00000100604	CHGA	0.599013	0.854369	0.974637	0.926544	-0.0141092	0.0460728
ENSG00000134504	KCTD1	-0.922631	0.854361	-1.14909	0.865852	-0.657719	0.809221
ENSG00000183873	SCN5A	-0.645229	0.854345	-0.705919	0.856685	-0.121467	0.36742
ENSG00000158669	GPAT4	0.360459	0.854329	0.269346	0.752748	-0.0581617	0.259169
ENSG00000188157	AGRN	-0.360495	0.854282	0.15143	0.533899	0.32352	0.831854
ENSG00000090861	AARS1	0.327659	0.854164	0.205717	0.684358	0.587717	0.960479
ENSG00000108651	UTP6	0.348487	0.854124	0.0491379	0.214495	-0.116829	0.46961
ENSG00000132613	MTSS2	0.626557	0.854077	0.827041	0.895503	0.399304	0.739314
ENSG00000124313	IQSEC2	-0.887089	0.853982	-0.134613	0.346739	-0.867944	0.852773
ENSG00000172379	ARNT2	-0.640182	0.853879	-0.0644315	0.197591	-0.26966	0.640593
ENSG00000124006	OBSL1	0.368252	0.853847	0.23768	0.698196	0.379212	0.861869
ENSG00000130176	CNN1	0.9178	0.853745	1.22029	0.896277	1.6008	0.942871
ENSG00000176697	BDNF	0.795257	0.853705	0.270643	0.531646	0.93744	0.885593
ENSG00000051108	HERPUD1	0.548771	0.853681	-0.219248	0.52677	-0.00941429	0.0427694
ENSG00000105894	PTN	-0.474769	0.853674	-0.0814992	0.281652	-0.545467	0.882187
ENSG00000126351	THRA	-1.02096	0.85365	-0.605839	0.764555	-0.351691	0.651799
ENSG00000148481	MINDY3	0.623395	0.85361	0.596549	0.833395	0.682786	0.873407
ENSG00000237649	KIFC1	-0.380218	0.853602	-0.120802	0.435668	-0.150751	0.539249
ENSG00000110218	PANX1	0.412696	0.853531	0.589699	0.919274	0.176968	0.571563
ENSG00000114315	HES1	-0.604916	0.853334	-0.660394	0.856408	0.0201682	0.0805364
ENSG00000213080	AL354714.2	1.13377	0.853231	0.0745231	0.15641	0.45537	0.620686
ENSG00000086189	DIMT1	0.418186	0.853168	0.498825	0.884684	0.00471554	0.0196461
ENSG00000158528	PPP1R9A	-0.359266	0.853065	-0.317618	0.810865	-0.412747	0.884534
ENSG00000062485	CS	-0.338037	0.853041	-0.21879	0.693841	-0.105836	0.453418
ENSG00000197124	ZNF682	-0.428445	0.853026	-0.48697	0.870427	-0.286217	0.74626
ENSG00000142102	PGGHG	-0.501733	0.852559	-1.67849	0.953959	-0.67238	0.899106
ENSG00000132872	SYT4	0.903395	0.852543	0.218775	0.437359	0.572447	0.745746
ENSG00000111641	NOP2	0.375007	0.85248	0.546813	0.92287	-0.0918158	0.35182
ENSG00000006757	PNPLA4	0.8852	0.852472	0.891778	0.84208	0.733234	0.812983
ENSG00000082516	GEMIN5	0.338766	0.852425	0.18898	0.632343	0.0257491	0.14816
ENSG00000113361	CDH6	-1.61072	0.852306	-1.2901	0.819328	-0.985188	0.802946
ENSG00000087510	TFAP2C	-0.728543	0.852077	-1.14286	0.8899	-0.213899	0.533606
ENSG00000114859	CLCN2	-0.822261	0.852014	-1.38288	0.891243	-0.736109	0.83903
ENSG00000100116	GCAT	-0.743772	0.85199	-0.945834	0.869827	-0.57187	0.811584
ENSG00000119812	FAM98A	-0.347943	0.851982	-0.141902	0.509179	-0.410772	0.890089
ENSG00000117461	PIK3R3	-0.582149	0.851809	-0.262713	0.625341	-0.552577	0.844024
ENSG00000124155	PIGT	-0.432231	0.851785	-0.334797	0.771027	-0.255238	0.707268
ENSG00000213096	ZNF254	-0.349996	0.851445	-1.2947	0.985364	-0.914643	0.976324
ENSG00000108960	MMD	-0.42453	0.851334	-0.960614	0.950166	0.247738	0.713748
ENSG00000129757	CDKN1C	-0.866881	0.851295	-0.940156	0.849011	-0.591037	0.794609
ENSG00000151151	IPMK	-0.419596	0.851255	-0.834983	0.941378	-0.399613	0.841693
ENSG00000116191	RALGPS2	-0.337897	0.851105	-0.545171	0.940303	-0.0913849	0.387059
ENSG00000160752	FDPS	0.334816	0.850923	0.266091	0.777041	0.0280087	0.153502
ENSG00000116830	TTF2	-0.339402	0.850852	-0.366932	0.866294	-0.344261	0.851722
ENSG00000124181	PLCG1	-0.338774	0.850821	-0.118259	0.457796	0.320265	0.840144
ENSG00000162998	FRZB	-1.21678	0.850805	-0.983862	0.81469	-0.276826	0.558381
ENSG00000101361	NOP56	0.317674	0.850805	0.179638	0.627672	-0.814242	0.983515
ENSG00000048405	ZNF800	0.758723	0.850742	0.121359	0.294186	0.243329	0.516734
ENSG00000279400	AC008957.3	-1.23503	0.850718	-1.43152	0.85233	-0.617732	0.757735
ENSG00000049130	KITLG	-0.556073	0.850607	-0.450819	0.795423	0.126573	0.414465
ENSG00000125970	RALY	-0.360534	0.850607	0.091017	0.355369	0.319829	0.828701
ENSG00000155660	PDIA4	-0.321292	0.850552	-0.490535	0.938983	-0.274935	0.80003
ENSG00000180773	SLC36A4	0.518714	0.850489	0.512072	0.835972	0.688473	0.905223
ENSG00000023191	RNH1	-0.502924	0.850457	-0.357578	0.758106	-0.477874	0.843187
ENSG00000079459	FDFT1	0.318759	0.85037	0.295631	0.823754	-0.279144	0.809853
ENSG00000069702	TGFBR3	-0.663376	0.850354	-0.832873	0.869771	-0.401082	0.749034
ENSG00000235152	AL353052.1	-1.11804	0.850354	-1.24343	0.849114	-1.27344	0.864461
ENSG00000119121	TRPM6	1.44968	0.850339	0.799242	0.680383	0.493249	0.566916
ENSG00000162458	FBLIM1	-0.367295	0.850102	0.0407658	0.175069	-0.300413	0.793534
ENSG00000167900	TK1	0.404678	0.849904	0.503853	0.892318	0.272344	0.73021
ENSG00000178409	BEND3	-0.358222	0.84988	0.0852784	0.352824	-0.544062	0.929192
ENSG00000166265	CYYR1	-0.461395	0.849849	-0.127183	0.419894	-0.0355482	0.159153
ENSG00000140945	CDH13	1.51399	0.84973	0.676788	0.621698	1.43305	0.838082
ENSG00000125772	GPCPD1	-0.45259	0.849612	-0.735684	0.917519	-0.797361	0.931847
ENSG00000188501	LCTL	1.21866	0.849572	1.08649	0.810106	1.12908	0.834359
ENSG00000136144	RCBTB1	-0.374133	0.849398	-0.464364	0.890887	0.130301	0.493484
ENSG00000033800	PIAS1	-0.402272	0.849367	-0.398677	0.839765	0.0754728	0.317894
ENSG00000179091	CYC1	0.345222	0.849295	0.0519601	0.21267	-0.00457122	0.0222382
ENSG00000197694	SPTAN1	-0.32464	0.849272	0.0332377	0.148255	-0.215746	0.725215
ENSG00000168917	SLC35G2	1.16405	0.849169	0.295282	0.471246	0.734404	0.739061
ENSG00000156170	NDUFAF6	0.688674	0.848979	0.0576577	0.163625	0.130584	0.338244
ENSG00000119397	CNTRL	-0.459923	0.848774	-0.308778	0.730225	-0.0321977	0.126933
ENSG00000145495	MARCHF6	-0.326751	0.848766	-0.242901	0.73258	-0.158916	0.595627
ENSG00000166165	CKB	-0.331033	0.84875	-0.300019	0.812319	-0.0535465	0.239563
ENSG00000266338	NBPF15	-1.12454	0.848671	-0.540962	0.723326	0.328539	0.653024
ENSG00000151640	DPYSL4	-0.566614	0.848568	-0.648335	0.859182	-0.396576	0.77501
ENSG00000109113	RAB34	0.327351	0.848458	0.283968	0.788737	-0.0254286	0.150625
ENSG00000116473	RAP1A	0.495947	0.848434	0.166488	0.470234	0.45226	0.826014
ENSG00000122335	SERAC1	-0.518634	0.848292	-0.911717	0.912659	-0.0336071	0.121306
ENSG00000173548	SNX33	-0.450989	0.848284	-0.033403	0.122934	-0.0752183	0.294636
ENSG00000140563	MCTP2	-0.964108	0.848213	-1.12482	0.852852	-0.292964	0.597278
ENSG00000178162	FAR2P2	0.564537	0.848165	0.0118682	0.0427852	0.0342121	0.105983
ENSG00000275221	H2AC15	0.396287	0.848071	0.171457	0.532531	0.0231994	0.0947692
ENSG00000100058	CRYBB2P1	-0.885996	0.848063	-0.751095	0.813267	-0.603512	0.791495
ENSG00000122783	CYREN	0.445071	0.84796	0.536864	0.879926	0.27596	0.706091
ENSG00000165929	TC2N	-0.389547	0.847826	-0.585039	0.917227	0.0954671	0.388133
ENSG00000198153	ZNF849P	-2.25221	0.847557	-2.25221	0.835118	-2.25221	0.849145
ENSG00000174442	ZWILCH	0.32519	0.847517	-0.0460159	0.21926	-0.152726	0.564964
ENSG00000158296	SLC13A3	1.04594	0.847312	0.978072	0.819265	1.24673	0.883688
ENSG00000170430	MGMT	1.06516	0.847272	1.06432	0.834715	1.14016	0.862825
ENSG00000026025	VIM	0.337422	0.847035	0.845044	0.979445	0.373142	0.87034
ENSG00000100350	FOXRED2	0.57915	0.846988	0.397371	0.73405	0.360533	0.718269
ENSG00000149474	KAT14	0.407129	0.846964	0.489587	0.880495	-0.37404	0.79856
ENSG00000137944	KYAT3	-0.402129	0.846877	-0.307383	0.762729	-0.218498	0.660603
ENSG00000164209	SLC25A46	0.398093	0.846624	0.0953558	0.345372	0.0046697	0.019899
ENSG00000101198	NKAIN4	-1.22625	0.846624	-1.48099	0.851564	-0.495845	0.708572
ENSG00000089250	NOS1	-1.17715	0.846474	-0.900761	0.801397	-0.173333	0.406879
ENSG00000163624	CDS1	-0.463949	0.846253	-0.535324	0.866105	-0.481299	0.855602
ENSG00000124749	COL21A1	-0.916513	0.846142	-0.934674	0.836027	-0.866825	0.841187
ENSG00000116478	HDAC1	0.33786	0.846103	0.164429	0.558073	0.643426	0.959159
ENSG00000143228	NUF2	-0.438627	0.846055	-0.632781	0.900671	-0.190352	0.582903
ENSG00000073060	SCARB1	0.451439	0.846047	0.24544	0.639985	0.328291	0.758375
ENSG00000102218	RP2	-0.551007	0.845953	-0.599906	0.85003	-0.409211	0.784928
ENSG00000143653	SCCPDH	0.458747	0.845929	0.453891	0.831641	0.150269	0.465683
ENSG00000134215	VAV3	-0.527655	0.845905	-0.790058	0.894072	-0.371771	0.765985
ENSG00000054277	OPN3	-1.06171	0.845834	-1.1623	0.843131	-0.466052	0.71186
ENSG00000129354	AP1M2	0.358909	0.845779	0.433668	0.884178	0.457348	0.902907
ENSG00000128268	MGAT3	-0.567977	0.845723	-0.935392	0.899786	-0.267582	0.652147
ENSG00000179403	VWA1	0.530115	0.845637	0.862973	0.922925	0.186886	0.510301
ENSG00000137166	FOXP4	-1.21772	0.845581	-0.54806	0.712523	-0.784575	0.792594
ENSG00000128309	MPST	0.398731	0.845581	0.428595	0.854993	0.526337	0.906456
ENSG00000136110	CNMD	-0.355623	0.845542	-0.274308	0.746861	-0.809983	0.964114
ENSG00000236333	TRHDE-AS1	-1.26092	0.845534	-1.36705	0.840816	-1.17503	0.839962
ENSG00000256663	AC112777.1	0.996534	0.845336	0.690295	0.744071	0.113	0.246027
ENSG00000181788	SIAH2	0.60822	0.845099	0.263427	0.574969	0.410628	0.74366
ENSG00000233309	RPS6P12	-1.29602	0.844973	-1.47819	0.844593	-1.70982	0.869155
ENSG00000175305	CCNE2	0.769502	0.844933	0.384067	0.643896	-0.077911	0.202973
ENSG00000165195	PIGA	0.50983	0.844902	0.494179	0.825414	0.322904	0.713227
ENSG00000162733	DDR2	1.54953	0.844878	0.831998	0.66295	0.456191	0.519547
ENSG00000138468	SENP7	-0.487079	0.844807	-1.08414	0.932258	-0.386087	0.794182
ENSG00000183323	CCDC125	0.804038	0.844791	0.505415	0.716238	0.742597	0.82927
ENSG00000122966	CIT	-0.364014	0.84468	-0.194713	0.611361	0.122035	0.467382
ENSG00000175497	DPP10	-0.696452	0.844585	-0.848609	0.859269	-0.153257	0.419191
ENSG00000164659	KIAA1324L	-0.365986	0.844475	-0.155298	0.53691	0.187949	0.632398
ENSG00000120915	EPHX2	0.845971	0.844475	0.341759	0.58265	0.497663	0.714017
ENSG00000196459	TRAPPC2	0.597529	0.844396	-0.285273	0.581947	-0.364165	0.667644
ENSG00000065183	WDR3	0.33087	0.844246	0.252193	0.741503	0.0778523	0.347671
ENSG00000063660	GPC1	-0.443824	0.844175	-0.758748	0.919772	-0.669189	0.91345
ENSG00000163359	COL6A3	0.850156	0.844143	0.384605	0.616695	0.335593	0.592916
ENSG00000187961	KLHL17	-0.953497	0.844135	-1.19425	0.856116	-0.576478	0.768965
ENSG00000143207	COP1	0.36185	0.844135	0.433532	0.882139	0.238144	0.713337
ENSG00000136732	GYPC	-0.671042	0.844056	-0.55828	0.79988	-1.05271	0.897028
ENSG00000156482	RPL30	0.310654	0.844001	0.0204091	0.107548	-0.0393113	0.20532
ENSG00000112320	SOBP	-1.17113	0.843898	-1.0086	0.814358	-0.689683	0.77501
ENSG00000008300	CELSR3	-0.399842	0.843874	-0.529734	0.892341	-0.104204	0.380665
ENSG00000149292	TTC12	0.944064	0.843756	0.582405	0.710856	0.477945	0.672646
ENSG00000135723	FHOD1	0.50152	0.843637	0.241309	0.59422	0.244595	0.6157
ENSG00000112541	PDE10A	-1.23691	0.843582	-1.24537	0.831546	-0.194629	0.43359
ENSG00000179455	MKRN3	2.21134	0.843519	1.88046	0.779088	-0.0573058	0.0686745
ENSG00000102996	MMP15	-0.416501	0.843408	-0.43581	0.844095	-0.106152	0.396415
ENSG00000122958	VPS26A	-0.389929	0.843392	-0.359527	0.812556	-0.0601023	0.248097
ENSG00000156256	USP16	0.368466	0.843329	0.238098	0.684516	-0.103376	0.381716
ENSG00000132773	TOE1	0.612622	0.843226	0.9777	0.916389	0.0629748	0.181904
ENSG00000255192	NANOGP8	-0.595405	0.843195	-0.87136	0.883087	-0.535752	0.82603
ENSG00000152495	CAMK4	-0.690893	0.843076	-0.555767	0.793566	-0.374784	0.713401
ENSG00000164889	SLC4A2	-0.37072	0.843068	-0.191332	0.601301	-0.339577	0.821415
ENSG00000099953	MMP11	-1.10063	0.842989	-1.30272	0.847802	-0.591341	0.753989
ENSG00000127831	VIL1	1.58684	0.842878	2.22286	0.908392	2.29833	0.923557
ENSG00000204789	ZNF204P	-0.526751	0.842878	-0.552839	0.839623	0.445327	0.844388
ENSG00000277443	MARCKS	-0.31761	0.842823	-0.326512	0.844254	0.076875	0.357945
ENSG00000170955	CAVIN3	1.15992	0.84272	1.24469	0.846356	0.272851	0.451339
ENSG00000182197	EXT1	0.391657	0.842665	0.319931	0.771596	0.183759	0.577846
ENSG00000137872	SEMA6D	-1.25144	0.84261	-0.2796	0.531386	0.166679	0.408467
ENSG00000138443	ABI2	-0.32771	0.842562	-0.079697	0.329835	0.443196	0.914477
ENSG00000171793	CTPS1	0.327162	0.842523	0.394943	0.880764	-0.0343449	0.151108
ENSG00000134595	SOX3	0.774014	0.842491	1.15937	0.905744	0.0442262	0.11564
ENSG00000122729	ACO1	-0.362582	0.842483	-0.215061	0.663195	0.0994684	0.402042
ENSG00000159217	IGF2BP1	-0.308938	0.842373	0.465433	0.934408	0.300929	0.834533
ENSG00000111615	KRR1	0.334053	0.842365	0.103134	0.392717	0.181834	0.630019
ENSG00000132603	NIP7	0.361206	0.842365	0.326674	0.805933	-0.239315	0.699942
ENSG00000255408	PCDHA3	-1.63743	0.842294	-1.08902	0.786746	-0.558458	0.696607
ENSG00000206149	HERC2P9	-0.495268	0.842246	-0.419476	0.793147	-0.743752	0.903492
ENSG00000183060	LYSMD4	-0.512192	0.842183	-0.212136	0.563036	-0.200162	0.564877
ENSG00000129493	HEATR5A	-0.441238	0.842001	-0.500121	0.858668	-0.0784427	0.296098
ENSG00000172943	PHF8	-0.398666	0.841906	-0.302555	0.74803	-0.280921	0.741771
ENSG00000254087	LYN	0.373597	0.841883	0.238201	0.681632	0.0591859	0.244778
ENSG00000180917	CMTR2	0.44461	0.84182	0.0392268	0.144525	0.368112	0.794498
ENSG00000112232	KHDRBS2	-0.760657	0.841725	-0.644971	0.803428	-0.537974	0.784865
ENSG00000169490	TM2D2	0.375976	0.84159	0.088795	0.325457	-0.287235	0.744759
ENSG00000103512	NOMO1	-0.364185	0.841519	-0.434425	0.876323	-0.542071	0.922024
ENSG00000130731	METTL26	0.467692	0.841511	0.0737967	0.231676	0.144376	0.434459
ENSG00000166123	GPT2	0.346038	0.841503	0.363855	0.842547	0.286097	0.786856
ENSG00000013297	CLDN11	-0.6021	0.84148	-0.749081	0.86273	0.301981	0.701444
ENSG00000151502	VPS26B	-0.449971	0.841377	-0.0742118	0.250974	-0.303933	0.735283
ENSG00000128965	CHAC1	0.94795	0.841353	0.753473	0.773675	0.567326	0.716356
ENSG00000162702	ZNF281	0.321775	0.841322	0.487916	0.931855	0.4174	0.907112
ENSG00000049618	ARID1B	-0.328618	0.841282	0.25195	0.745067	-0.196635	0.672496
ENSG00000128610	FEZF1	-1.08555	0.841029	-1.5762	0.863394	-1.99854	0.890911
ENSG00000242779	ZNF702P	0.93679	0.841021	0.194778	0.380057	1.03491	0.863275
ENSG00000105866	SP4	-0.358521	0.840927	-0.29286	0.766262	-0.0266065	0.139957
ENSG00000104228	TRIM35	0.449949	0.840753	0.262889	0.651839	-0.125604	0.402477
ENSG00000134516	DOCK2	0.791263	0.840737	0.796087	0.829855	0.801291	0.84506
ENSG00000176853	FAM91A1	0.349325	0.840705	-0.247925	0.704961	-0.214481	0.661338
ENSG00000170345	FOS	0.624414	0.840666	-0.550794	0.736342	1.58687	0.968041
ENSG00000125753	VASP	0.342705	0.840405	0.431453	0.892721	0.347668	0.848426
ENSG00000173166	RAPH1	-0.53139	0.840326	0.317558	0.725634	0.229271	0.624788
ENSG00000137936	BCAR3	-0.612222	0.84031	-0.768881	0.862461	-0.159268	0.452833
ENSG00000106086	PLEKHA8	-0.32857	0.840271	-0.224353	0.689203	-0.0369871	0.19432
ENSG00000262655	SPON1	-0.895058	0.840168	-0.468111	0.712168	-0.171808	0.425647
ENSG00000166689	PLEKHA7	-0.649989	0.840144	-0.488104	0.773153	-0.621593	0.834699
ENSG00000155438	NIFK	0.335782	0.840089	0.269628	0.755087	-0.0633125	0.263358
ENSG00000128585	MKLN1	-0.332069	0.840065	-0.136273	0.511376	0.0420324	0.19639
ENSG00000152894	PTPRK	-0.332254	0.840018	-0.135622	0.511139	-0.0751603	0.347284
ENSG00000228314	CYP4F29P	-2.24197	0.839702	-2.24197	0.826915	-2.24197	0.841393
ENSG00000005339	CREBBP	-0.363643	0.839536	0.488151	0.913971	-0.0577904	0.256545
ENSG00000254635	WAC-AS1	-0.768217	0.839496	-0.68544	0.810122	-0.653301	0.816555
ENSG00000004864	SLC25A13	0.334531	0.839465	0.39992	0.883198	0.43017	0.9035
ENSG00000100285	NEFH	1.044	0.839378	-0.00933099	0.028995	0.390237	0.578849
ENSG00000152932	RAB3C	-0.922773	0.839362	-0.579367	0.752638	-0.174027	0.423371
ENSG00000060138	YBX3	0.319308	0.839314	0.463475	0.920009	0.298671	0.821533
ENSG00000261236	BOP1	0.344669	0.839291	-0.202763	0.628541	-0.328819	0.819431
ENSG00000152952	PLOD2	-0.37674	0.839188	-0.405349	0.848576	0.0440982	0.181193
ENSG00000163545	NUAK2	1.05568	0.839069	1.49235	0.89785	1.58686	0.917132
ENSG00000224597	SVIL-AS1	1.64218	0.838967	1.4904	0.79954	1.66205	0.843922
ENSG00000145681	HAPLN1	-1.31137	0.838919	-1.36324	0.830179	-0.72769	0.765472
ENSG00000172728	FUT10	-0.408387	0.838856	-1.06751	0.952149	-0.502288	0.880811
ENSG00000275004	ZNF280B	0.626438	0.838856	0.411761	0.712879	0.523827	0.796869
ENSG00000126247	CAPNS1	0.34461	0.838801	0.167702	0.569643	0.183188	0.616261
ENSG00000053372	MRTO4	0.344116	0.838722	0.305865	0.79958	-0.411757	0.873904
ENSG00000240771	ARHGEF25	-1.46382	0.838651	-1.45332	0.825271	-0.51554	0.687369
ENSG00000167785	ZNF558	1.20428	0.838469	-0.729836	0.596132	-0.729836	0.610958
ENSG00000050555	LAMC3	0.804069	0.838445	0.638418	0.770529	0.490726	0.716277
ENSG00000177058	SLC38A9	0.362829	0.83824	0.0975733	0.364291	-0.276333	0.746829
ENSG00000147526	TACC1	-0.418778	0.838224	-0.965294	0.942626	-0.535206	0.887631
ENSG00000167925	GHDC	0.984136	0.838113	0.218878	0.407234	-0.105129	0.230522
ENSG00000163638	ADAMTS9	-1.6094	0.838003	-1.34495	0.808043	-0.871704	0.76985
ENSG00000059573	ALDH18A1	0.324166	0.837923	0.294236	0.798489	0.134083	0.512482
ENSG00000099991	CABIN1	0.352213	0.837852	0.497723	0.912351	0.680377	0.956662
ENSG00000140386	SCAPER	-0.629019	0.837805	-0.534529	0.794791	-0.355366	0.71231
ENSG00000077274	CAPN6	1.35975	0.837694	2.1143	0.919985	1.43266	0.851737
ENSG00000171067	C11orf24	0.470121	0.837465	0.219567	0.57063	0.208145	0.572235
ENSG00000114480	GBE1	0.603311	0.837457	0.636854	0.838255	0.168044	0.433566
ENSG00000164823	OSGIN2	0.463698	0.837315	0.064458	0.202768	-0.016758	0.0746647
ENSG00000114054	PCCB	0.357698	0.837291	0.357112	0.828037	0.353535	0.831554
ENSG00000159131	GART	0.309428	0.837283	0.154713	0.551292	0.299608	0.828377
ENSG00000076382	SPAG5	-0.315983	0.837228	-0.110263	0.4305	-0.286945	0.809908
ENSG00000101004	NINL	-0.394318	0.837157	-0.397743	0.832929	-0.532976	0.899146
ENSG00000133216	EPHB2	-0.475708	0.837141	-0.996097	0.92415	-0.0360147	0.151424
ENSG00000224032	EPB41L4A-AS1	0.37546	0.837117	0.621401	0.930077	-0.157699	0.524155
ENSG00000104522	TSTA3	0.403768	0.837102	-0.1209	0.389018	-0.199542	0.586096
ENSG00000182903	ZNF721	0.315848	0.837086	0.168797	0.589723	-0.0264782	0.149519
ENSG00000166794	PPIB	0.308303	0.837086	0.230351	0.721612	0.165739	0.62293
ENSG00000213625	LEPROT	0.404748	0.837054	0.254154	0.668063	0.203803	0.602241
ENSG00000136861	CDK5RAP2	-0.342691	0.837015	0.0553173	0.249196	-0.0904255	0.374865
ENSG00000064012	CASP8	0.815401	0.836975	0.174817	0.368345	0.061375	0.153644
ENSG00000225138	SLC9A3-AS1	-1.61269	0.836738	-1.87251	0.836351	-0.75256	0.745533
ENSG00000198373	WWP2	-0.399558	0.836564	-0.00326828	0.0185634	-0.330085	0.785995
ENSG00000141994	DUS3L	0.647596	0.836548	0.920057	0.893076	0.160571	0.400738
ENSG00000112200	ZNF451	0.323268	0.836541	0.136259	0.512893	0.291102	0.808525
ENSG00000182752	PAPPA	1.55992	0.836477	1.54604	0.821288	1.76189	0.867701
ENSG00000135636	DYSF	-0.648736	0.83639	0.221797	0.552257	-0.52747	0.801484
ENSG00000135446	CDK4	0.324996	0.836351	0.317285	0.8272	0.039352	0.194723
ENSG00000162377	COA7	0.345701	0.836335	0.492756	0.908763	0.262291	0.745138
ENSG00000106105	GARS1	0.308377	0.836327	0.406197	0.903152	0.172609	0.62267
ENSG00000130224	LRCH2	0.634144	0.836256	0.191749	0.44674	0.692982	0.856827
ENSG00000109971	HSPA8	0.304987	0.836248	0.281271	0.805088	-0.184657	0.653546
ENSG00000143869	GDF7	-2.13789	0.836066	-2.08975	0.821446	-1.64697	0.817258
ENSG00000147669	POLR2K	0.371337	0.836051	-0.0953317	0.350335	-0.0798528	0.308435
ENSG00000084731	KIF3C	-0.377056	0.835995	0.143592	0.482057	-0.0616105	0.248817
ENSG00000056487	PHF21B	-0.599237	0.835979	-0.0530371	0.165245	0.157175	0.463454
ENSG00000145362	ANK2	-0.315112	0.83594	-0.159899	0.56841	-0.801225	0.975225
ENSG00000137709	POU2F3	1.23902	0.83594	0.477444	0.571926	0.569765	0.634848
ENSG00000257267	ZNF271P	0.383499	0.835892	0.0595889	0.22367	0.0938083	0.340006
ENSG00000111186	WNT5B	-1.52988	0.835877	-1.48872	0.820403	-1.74954	0.848679
ENSG00000111110	PPM1H	0.366858	0.835869	0.84864	0.965402	0.695593	0.951375
ENSG00000162139	NEU3	0.391255	0.835616	0.206992	0.604193	0.366831	0.82147
ENSG00000104412	EMC2	0.38462	0.835608	-0.260435	0.679174	0.135891	0.478769
ENSG00000075391	RASAL2	0.335909	0.835458	0.401116	0.872403	0.55503	0.938351
ENSG00000071564	TCF3	-0.316305	0.835363	-0.00858815	0.0610484	0.106984	0.454516
ENSG00000121005	CRISPLD1	0.369591	0.835331	0.208067	0.622456	-0.0346973	0.134994
ENSG00000123600	METTL8	0.339736	0.835284	0.204324	0.632754	0.34652	0.8437
ENSG00000248540	AC010931.1	-2.18144	0.835079	-2.1282	0.820435	-1.66083	0.815314
ENSG00000134698	AGO4	-0.503686	0.835055	-0.659332	0.870917	0.274708	0.692696
ENSG00000106785	TRIM14	0.986799	0.835047	1.49491	0.905484	1.43962	0.909056
ENSG00000106018	VIPR2	-1.93842	0.835015	-2.06769	0.826702	-1.58041	0.819913
ENSG00000145214	DGKQ	-0.700885	0.834952	-1.22095	0.885774	-0.402285	0.722939
ENSG00000184481	FOXO4	0.468403	0.834936	1.10851	0.958922	-0.0882107	0.287872
ENSG00000172167	MTBP	0.409758	0.834841	-0.242211	0.623239	-0.0514336	0.190621
ENSG00000198624	CCDC69	-0.768971	0.834802	-0.319825	0.624961	-0.0868522	0.259414
ENSG00000277437	FP671120.2	0.71437	0.834747	-0.419172	0.628162	-2.14357	0.872735
ENSG00000259439	LINC01833	-1.91886	0.834691	-1.88159	0.820135	-1.00755	0.769778
ENSG00000074755	ZZEF1	-0.379387	0.834596	-0.18244	0.565391	-0.403152	0.849335
ENSG00000065320	NTN1	-1.32127	0.834589	-1.16832	0.80851	-0.214119	0.450011
ENSG00000263956	NBPF11	-0.552905	0.834525	-0.71772	0.865148	-0.531339	0.828883
ENSG00000132199	ENOSF1	-0.410504	0.834446	-0.655052	0.909174	-0.652042	0.91533
ENSG00000170558	CDH2	0.326486	0.834344	0.386149	0.872158	0.0100439	0.0623602
ENSG00000253873	PCDHGA11	-1.49477	0.834257	-0.0752243	0.193379	-0.838434	0.767684
ENSG00000081087	OSTM1	-0.446177	0.834217	-0.514606	0.850829	-0.325964	0.754993
ENSG00000100612	DHRS7	-0.541483	0.834154	-0.400191	0.753238	-0.246617	0.622512
ENSG00000115318	LOXL3	-0.530711	0.83398	-0.610557	0.847106	-0.793959	0.893479
ENSG00000205213	LGR4	-0.32283	0.833925	-0.282638	0.781988	-0.280377	0.794893
ENSG00000166025	AMOTL1	-0.314918	0.833861	-0.888503	0.983309	-0.432921	0.911893
ENSG00000158292	GPR153	-0.93767	0.833664	-1.27277	0.853808	-0.438982	0.699365
ENSG00000107949	BCCIP	0.318624	0.833617	0.0513293	0.217972	0.106256	0.446716
ENSG00000177239	MAN1B1	-0.382346	0.833577	-0.533789	0.894689	-0.609199	0.920902
ENSG00000117395	EBNA1BP2	0.341988	0.833569	0.250822	0.717723	0.187692	0.630154
ENSG00000175054	ATR	-0.346155	0.833403	-0.166844	0.562886	0.290579	0.79193
ENSG00000111843	TMEM14C	0.339793	0.833372	0.203618	0.630351	0.160666	0.565841
ENSG00000015133	CCDC88C	-0.34815	0.833372	-0.133511	0.465714	-0.318511	0.809252
ENSG00000125430	HS3ST3B1	-1.04735	0.833332	-0.317861	0.580082	-0.307879	0.587953
ENSG00000204852	TCTN1	0.80394	0.833293	0.0666057	0.169402	0.292687	0.54682
ENSG00000091073	DTX2	-0.613882	0.833213	-0.549955	0.800931	-0.528809	0.808304
ENSG00000113407	TARS1	0.302543	0.833111	0.383263	0.891433	0.250611	0.774204
ENSG00000125730	C3	1.63189	0.833103	0.614801	0.551111	1.89128	0.871486
ENSG00000169710	FASN	-0.301967	0.833024	0.315596	0.845265	-0.0875371	0.399063
ENSG00000200087	SNORA73B	-0.305137	0.832929	-0.366218	0.874292	-0.624814	0.96104
ENSG00000142634	EFHD2	-0.691774	0.832826	-0.689173	0.819803	-0.194903	0.488664
ENSG00000169991	IFFO2	0.721344	0.832739	0.487836	0.719636	0.603581	0.791835
ENSG00000156261	CCT8	0.297678	0.832724	0.143281	0.528999	0.197278	0.690301
ENSG00000196405	EVL	-0.476388	0.832668	-0.499106	0.830195	-0.029599	0.117529
ENSG00000278845	MRPL45	0.357851	0.832637	0.399019	0.85346	0.175028	0.588925
ENSG00000139722	VPS37B	-0.858452	0.832265	-0.464674	0.706043	0.040229	0.127028
ENSG00000108306	FBXL20	0.618613	0.832107	0.173414	0.412806	0.65248	0.844941
ENSG00000135248	FAM71F1	1.66331	0.832068	1.3544	0.760343	2.17566	0.898395
ENSG00000175606	TMEM70	0.488104	0.832036	0.196648	0.516497	-0.0143719	0.0487992
ENSG00000029639	TFB1M	0.422555	0.831981	0.0685762	0.237089	0.375548	0.803847
ENSG00000058056	USP13	-0.358087	0.831736	-0.266598	0.729388	-0.0544087	0.218984
ENSG00000160284	SPATC1L	0.847399	0.83153	1.07726	0.869258	0.882359	0.841756
ENSG00000221968	FADS3	0.586685	0.831467	0.194321	0.459439	0.502328	0.794245
ENSG00000155511	GRIA1	1.27095	0.831388	0.623429	0.630485	1.23834	0.827065
ENSG00000176248	ANAPC2	-0.602601	0.831143	-0.174517	0.452825	-0.535024	0.812113
ENSG00000198467	TPM2	0.342918	0.831135	0.944857	0.978268	0.811736	0.9711
ENSG00000239672	NME1	0.343485	0.830969	0.363652	0.838485	0.219649	0.683386
ENSG00000177822	TENM3-AS1	0.874722	0.830945	0.460268	0.649001	0.523456	0.702345
ENSG00000168487	BMP1	-1.25431	0.83093	-1.26064	0.818507	-0.520914	0.697611
ENSG00000258405	ZNF578	-0.469586	0.830906	-0.270351	0.657987	-0.0482418	0.184718
ENSG00000136856	SLC2A8	-0.570481	0.830874	-0.614356	0.831538	-0.846251	0.887782
ENSG00000090565	RAB11FIP3	-0.454193	0.830874	-0.155655	0.476588	-0.364593	0.777333
ENSG00000167695	TLCD3A	0.532938	0.830835	0.640101	0.860399	0.0628663	0.189855
ENSG00000130449	ZSWIM6	-0.548472	0.830819	-0.430718	0.765321	-0.0905139	0.292115
ENSG00000135709	KIAA0513	-1.11463	0.830811	-0.87711	0.786706	0.177401	0.426675
ENSG00000010165	EEF1AKNMT	0.360231	0.830756	0.623566	0.935593	0.231508	0.68341
ENSG00000111875	ASF1A	0.360951	0.83044	0.368801	0.828322	0.150526	0.519105
ENSG00000204711	C9orf135	-0.490289	0.830408	-0.900865	0.906527	-1.27819	0.938999
ENSG00000186665	C17orf58	-0.512986	0.830408	-0.719638	0.874726	-0.28527	0.679372
ENSG00000120458	MSANTD2	-0.457502	0.830258	-0.550187	0.855207	-0.615083	0.884407
ENSG00000182013	PNMA8A	0.393275	0.830226	0.185428	0.557378	0.507549	0.891899
ENSG00000143674	MAP3K21	0.366296	0.830155	0.320462	0.77535	0.388246	0.846269
ENSG00000049246	PER3	0.61372	0.829871	-0.151192	0.361746	0.590188	0.822727
ENSG00000173517	PEAK1	-0.327837	0.829831	-0.325872	0.82019	-0.090896	0.376485
ENSG00000138279	ANXA7	0.330298	0.829776	0.279597	0.765914	-0.0121693	0.0629766
ENSG00000165304	MELK	-0.333247	0.829713	-0.530088	0.923936	-0.347677	0.845945
ENSG00000120913	PDLIM2	0.692554	0.829705	0.0581679	0.157311	0.402575	0.685836
ENSG00000167552	TUBA1A	-0.300224	0.829689	0.0968734	0.406902	-0.653082	0.968769
ENSG00000137269	LRRC1	-0.485112	0.829665	-0.628131	0.864469	-0.27313	0.6689
ENSG00000205571	SMN2	1.60338	0.829555	1.53801	0.804708	1.56267	0.824623
ENSG00000114554	PLXNA1	-0.3202	0.829523	0.0163472	0.0996136	0.0045098	0.0230917
ENSG00000001036	FUCA2	0.363356	0.829389	0.381877	0.83511	0.300797	0.775121
ENSG00000184809	B3GALT5-AS1	0.827326	0.829317	0.778552	0.802243	0.673847	0.782004
ENSG00000109814	UGDH	-0.318493	0.829167	-0.350126	0.846213	-0.355849	0.860881
ENSG00000169760	NLGN1	-0.366445	0.829096	-0.785552	0.943369	-1.01604	0.963379
ENSG00000138190	EXOC6	-0.592184	0.829088	-0.485132	0.777436	-0.644011	0.844506
ENSG00000109381	ELF2	-0.367187	0.829057	-0.367295	0.819028	-0.182342	0.589621
ENSG00000165617	DACT1	0.831728	0.828701	1.32404	0.906416	-0.0451725	0.120572
ENSG00000165895	ARHGAP42	-0.363347	0.828314	-0.282911	0.739092	-0.0785418	0.321134
ENSG00000169836	TACR3	0.875021	0.828132	-0.182432	0.350398	0.387357	0.61144
ENSG00000126016	AMOT	0.881587	0.828132	1.04509	0.85263	0.978965	0.852314
ENSG00000213390	ARHGAP19	-0.355244	0.828116	-0.0989546	0.367563	0.1136	0.425426
ENSG00000225077	LINC00337	-1.31301	0.82795	-1.37585	0.819818	-1.16407	0.817226
ENSG00000005448	WDR54	0.573755	0.82795	0.151991	0.383581	0.147423	0.394392
ENSG00000133835	HSD17B4	-0.298385	0.827887	-0.0570323	0.264187	0.058259	0.282988
ENSG00000006118	TMEM132A	-0.373805	0.827713	-0.122046	0.419934	-0.598611	0.919471
ENSG00000139437	TCHP	1.28687	0.82761	1.2271	0.802409	0.734603	0.682406
ENSG00000169410	PTPN9	-0.342702	0.827603	-0.23853	0.698014	-0.383827	0.857269
ENSG00000130508	PXDN	-0.298034	0.827587	0.0212613	0.106291	-0.169394	0.624234
ENSG00000196507	TCEAL3	0.876677	0.827555	0.109641	0.242652	0.808096	0.810659
ENSG00000116106	EPHA4	-0.92004	0.827192	-0.505654	0.711267	-0.426739	0.688286
ENSG00000177842	ZNF620	0.442905	0.826947	0.323237	0.716127	0.0695135	0.23908
ENSG00000128829	EIF2AK4	0.296764	0.826915	0.0836541	0.336213	0.301706	0.827563
ENSG00000172260	NEGR1	-1.30241	0.826907	-1.33058	0.815883	-0.861931	0.777942
ENSG00000277883	NLRP3P1	1.01901	0.826907	0.423044	0.578889	0.837569	0.781459
ENSG00000179981	TSHZ1	-1.92204	0.826899	-1.88499	0.812232	-1.44211	0.80244
ENSG00000173559	NABP1	0.621335	0.826891	0.195982	0.455211	0.665518	0.843953
ENSG00000141756	FKBP10	0.312385	0.826796	0.0551715	0.25438	-0.222705	0.705522
ENSG00000136485	DCAF7	-0.323101	0.826789	-0.201281	0.645548	0.107444	0.44708
ENSG00000108021	TASOR2	0.304702	0.826575	0.17867	0.620757	0.102183	0.426991
ENSG00000180574	EIF2S3B	0.668546	0.826488	0.485482	0.731111	0.613311	0.807664
ENSG00000148143	ZNF462	-0.300134	0.826425	0.230823	0.722757	-0.00679983	0.0668173
ENSG00000170525	PFKFB3	-0.425165	0.826393	-0.142054	0.440742	-0.194198	0.569982
ENSG00000079999	KEAP1	0.363237	0.826378	0.794246	0.958392	0.106495	0.402579
ENSG00000106367	AP1S1	0.449056	0.826259	0.360814	0.749026	0.589981	0.887181
ENSG00000009413	REV3L	0.424254	0.826251	0.371546	0.776401	0.483064	0.859261
ENSG00000198121	LPAR1	-0.950318	0.826243	-1.06725	0.827041	-0.698308	0.783592
ENSG00000088766	CRLS1	0.372291	0.826196	0.356185	0.806273	-0.50504	0.874505
ENSG00000204227	RING1	-0.661377	0.826148	-0.0185649	0.068145	-0.453275	0.75225
ENSG00000173065	FAM222B	-0.43521	0.826117	-0.0218195	0.0841401	-0.000386301	0.0105738
ENSG00000196557	CACNA1H	-0.380687	0.826046	-0.962601	0.94966	-0.377786	0.826931
ENSG00000153885	KCTD15	-0.4111	0.825959	0.0257783	0.11602	-0.657933	0.909996
ENSG00000139998	RAB15	-0.361504	0.82588	0.3232	0.796735	-0.0499092	0.212583
ENSG00000104320	NBN	0.319159	0.825785	0.137267	0.501134	-0.140347	0.521689
ENSG00000178074	C2orf69	0.339914	0.82573	0.0258497	0.126277	0.265238	0.752519
ENSG00000267374	MIR924HG	-0.751375	0.82573	-1.41847	0.881965	-2.95843	0.926165
ENSG00000182810	DDX28	0.540921	0.825603	0.693402	0.868207	0.00527041	0.0328831
ENSG00000066468	FGFR2	-0.319014	0.825556	0.137805	0.509424	0.276298	0.793091
ENSG00000079785	DDX1	0.295011	0.825493	0.214234	0.683007	0.13317	0.518939
ENSG00000099889	ARVCF	-0.408771	0.825327	-0.394201	0.802377	-0.437166	0.842404
ENSG00000104341	LAPTM4B	0.290506	0.82524	-0.00010165	0.0154261	0.0674799	0.326619
ENSG00000170745	KCNS3	-0.422535	0.825169	-0.947483	0.931657	-0.160598	0.509282
ENSG00000207927	MIR302A	0.84867	0.825113	0.339855	0.558302	0.493017	0.68665
ENSG00000165795	NDRG2	-0.76802	0.825089	-0.366293	0.655	0.389373	0.731632
ENSG00000175701	MTLN	0.953302	0.824955	0.89328	0.796047	0.91182	0.8168
ENSG00000132780	NASP	-0.286564	0.824939	-0.0248642	0.10799	0.0776958	0.364694
ENSG00000146085	MMUT	-0.439786	0.824931	-0.479623	0.832581	-0.354091	0.768917
ENSG00000185274	GALNT17	-0.392256	0.824931	-0.51134	0.87283	-0.57077	0.900149
ENSG00000155897	ADCY8	0.760702	0.824916	0.157843	0.34941	-0.155714	0.345949
ENSG00000104885	DOT1L	-0.387706	0.82471	-0.485663	0.865085	-0.471291	0.867559
ENSG00000087303	NID2	-0.820461	0.824623	-0.632858	0.769178	-0.169553	0.420424
ENSG00000171951	SCG2	0.78381	0.824576	-0.94413	0.74366	-0.504687	0.648108
ENSG00000140534	TICRR	-0.321524	0.824347	-0.214587	0.662808	-0.300124	0.806597
ENSG00000141934	PLPP2	-0.456723	0.824291	-0.411062	0.786121	-0.233151	0.621113
ENSG00000100219	XBP1	0.313736	0.824283	0.262115	0.753207	0.262828	0.768775
ENSG00000146574	CCZ1B	0.458485	0.824015	0.453031	0.807711	0.51747	0.854669
ENSG00000156467	UQCRB	0.302357	0.823936	-0.0202417	0.103644	0.130016	0.516623
ENSG00000178177	LCORL	-0.384675	0.823793	-0.396501	0.825421	0.042081	0.173425
ENSG00000184557	SOCS3	0.455292	0.82373	0.808223	0.92381	0.0969144	0.315144
ENSG00000160221	GATD3A	0.693724	0.823651	0.726585	0.821628	0.86385	0.870712
ENSG00000156469	MTERF3	0.399015	0.823572	-0.287127	0.681458	0.028275	0.117055
ENSG00000020577	SAMD4A	0.432046	0.823201	0.683	0.908708	0.33549	0.753041
ENSG00000265579	AC023301.1	-0.966603	0.823043	-1.51368	0.855973	-0.838988	0.80591
ENSG00000065882	TBC1D1	-0.312921	0.822979	-0.201545	0.651436	0.205263	0.693865
ENSG00000101265	RASSF2	-0.433582	0.822916	-0.358112	0.762042	-0.895131	0.928884
ENSG00000105642	KCNN1	-1.07999	0.822908	-1.45171	0.840326	-0.298896	0.562902
ENSG00000101849	TBL1X	-0.398491	0.822869	0.237581	0.662199	0.373364	0.827429
ENSG00000198843	SELENOT	0.316691	0.822853	0.282391	0.769399	-0.0224961	0.105201
ENSG00000150687	PRSS23	0.556011	0.822758	0.0909769	0.250105	-0.329284	0.633884
ENSG00000133703	KRAS	-0.301503	0.822671	-0.368749	0.873138	0.10433	0.427046
ENSG00000087586	AURKA	-0.315074	0.822584	-0.0676613	0.287105	0.402863	0.889765
ENSG00000136603	SKIL	-0.285194	0.822505	-0.258123	0.773999	0.0727331	0.325607
ENSG00000159788	RGS12	-0.470954	0.82241	-0.405547	0.776575	-0.191196	0.543753
ENSG00000100473	COCH	-0.426404	0.822339	-0.58031	0.871075	-0.266453	0.688057
ENSG00000165072	MAMDC2	0.516497	0.822276	0.500316	0.801097	0.709801	0.888975
ENSG00000125257	ABCC4	0.421967	0.822181	0.111671	0.345822	0.437219	0.834296
ENSG00000006432	MAP3K9	-0.352796	0.82215	-0.208544	0.632106	0.00841404	0.056449
ENSG00000147687	TATDN1	0.38227	0.822126	-0.165142	0.503165	-0.078181	0.288986
ENSG00000197181	PIWIL2	-1.00346	0.821968	-1.27594	0.835774	0.264503	0.560483
ENSG00000132676	DAP3	0.330239	0.82196	0.0556888	0.237745	0.152486	0.538577
ENSG00000068305	MEF2A	-0.389873	0.821873	-0.264562	0.683852	-0.143349	0.477663
ENSG00000108828	VAT1	0.299309	0.821857	0.476054	0.92773	0.52742	0.944555
ENSG00000018189	RUFY3	-0.410742	0.821818	-0.485438	0.849082	-0.17273	0.53476
ENSG00000173812	EIF1	0.305385	0.821731	0.425929	0.899912	0.435711	0.908392
ENSG00000155846	PPARGC1B	-0.409532	0.821581	-0.276432	0.693122	-0.271865	0.701578
ENSG00000104695	PPP2CB	0.340871	0.821573	0.164684	0.531338	0.198118	0.636389
ENSG00000104299	INTS9	0.452199	0.821336	0.116315	0.352879	-0.0201859	0.0769723
ENSG00000133980	VRTN	0.304053	0.821328	0.792561	0.979271	0.360428	0.871194
ENSG00000103485	QPRT	-0.352183	0.821328	0.20295	0.623697	0.336573	0.828393
ENSG00000188730	VWC2	-1.38949	0.82132	-1.70128	0.826362	-1.08248	0.795201
ENSG00000081026	MAGI3	-0.520178	0.821241	-0.405655	0.752132	-0.227112	0.587171
ENSG00000277363	SRCIN1	-1.71117	0.821201	-1.79213	0.811987	-1.20398	0.786998
ENSG00000110906	KCTD10	-0.3363	0.820996	0.054523	0.209501	-0.197795	0.643312
ENSG00000164983	TMEM65	0.399795	0.820972	-0.25702	0.640064	0.341758	0.774773
ENSG00000100842	EFS	-0.5232	0.820838	-0.789927	0.874228	0.103208	0.326358
ENSG00000139971	ARMH4	-0.477993	0.820767	-0.347625	0.725239	-0.0504599	0.180735
ENSG00000196150	ZNF250	0.55469	0.820427	-0.35356	0.634848	0.172109	0.439367
ENSG00000169126	ARMC4	-0.95095	0.820356	-0.306796	0.569903	-0.840533	0.805309
ENSG00000184983	NDUFA6	-0.316705	0.820356	0.00819998	0.0573578	-0.263474	0.757703
ENSG00000115652	UXS1	0.361815	0.820237	0.430534	0.858431	0.43482	0.868452
ENSG00000166263	STXBP4	-0.355141	0.820237	-0.120927	0.420526	-0.0512353	0.211397
ENSG00000104679	R3HCC1	0.499111	0.820158	0.463006	0.786524	-0.0503971	0.160251
ENSG00000144120	TMEM177	0.439094	0.820095	0.523329	0.85135	0.430642	0.816373
ENSG00000169116	PARM1	-0.708105	0.820087	-0.201958	0.47172	-0.645672	0.807324
ENSG00000135677	GNS	-0.337254	0.81989	-0.26654	0.733711	0.0338402	0.143687
ENSG00000274618	H4C6	-0.294784	0.819874	-0.490434	0.936589	-0.20533	0.706446
ENSG00000181392	SYNE4	0.915238	0.819866	0.698733	0.739337	0.893894	0.816009
ENSG00000187260	WDR86	-0.909131	0.819755	-0.794067	0.78658	-0.12421	0.312615
ENSG00000138385	SSB	0.285594	0.819676	-0.00562886	0.0617201	0.303746	0.830305
ENSG00000196914	ARHGEF12	-0.29609	0.819668	-0.196179	0.65775	-0.0780609	0.353883
ENSG00000126602	TRAP1	0.296154	0.819566	0.139035	0.515928	0.179591	0.635883
ENSG00000169564	PCBP1	-0.305506	0.819305	0.185247	0.631394	0.014811	0.0674259
ENSG00000027075	PRKCH	-0.880347	0.819305	-0.993337	0.821233	-0.331962	0.615478
ENSG00000133424	LARGE1	0.314861	0.819273	0.0913435	0.355487	0.125	0.499127
ENSG00000129484	PARP2	0.400532	0.819178	0.529993	0.876149	0.60317	0.908234
ENSG00000140577	CRTC3	-1.15685	0.819178	-1.14263	0.803721	-0.52805	0.69675
ENSG00000151240	DIP2C	-0.42621	0.819131	-0.490834	0.837062	-0.285504	0.708691
ENSG00000127824	TUBA4A	0.440191	0.818949	0.666869	0.898182	0.0377303	0.142462
ENSG00000151414	NEK7	0.41945	0.818894	0.0508314	0.172255	0.0923298	0.304625
ENSG00000115163	CENPA	-0.521386	0.818838	-0.467002	0.783063	0.109366	0.349371
ENSG00000186871	ERCC6L	0.328886	0.818767	0.138913	0.484973	0.19498	0.626099
ENSG00000160957	RECQL4	0.354687	0.81872	-0.474277	0.859719	-0.310631	0.764492
ENSG00000197635	DPP4	-0.924873	0.818704	-1.03545	0.819566	-0.527435	0.726487
ENSG00000129657	SEC14L1	-0.36323	0.818586	-0.0488329	0.196714	0.223268	0.672449
ENSG00000154582	ELOC	0.341371	0.818475	0.0957855	0.360197	0.07142	0.283264
ENSG00000185122	HSF1	0.35532	0.818451	0.182539	0.554216	-0.142599	0.474589
ENSG00000176978	DPP7	-0.935328	0.818372	-1.95828	0.873739	-0.437448	0.681956
ENSG00000196411	EPHB4	-0.298649	0.818222	-0.103704	0.398936	-0.374492	0.87505
ENSG00000117713	ARID1A	-0.308189	0.818206	0.428067	0.90282	-0.0600358	0.270833
ENSG00000163902	RPN1	0.291343	0.818151	0.11162	0.436103	-0.0482139	0.240527
ENSG00000151846	PABPC3	1.58999	0.818111	1.18181	0.719383	0.951104	0.673215
ENSG00000170876	TMEM43	0.356554	0.818048	0.374325	0.817432	-0.0392293	0.165601
ENSG00000069667	RORA	-0.379437	0.818024	-0.563294	0.889291	-0.318658	0.770932
ENSG00000160007	ARHGAP35	-0.303488	0.817993	-0.0297967	0.143347	-0.05207	0.237105
ENSG00000160294	MCM3AP	-0.296353	0.817969	-0.15386	0.543714	-0.234519	0.729728
ENSG00000103018	CYB5B	0.30097	0.81789	0.304274	0.80817	-0.360399	0.861948
ENSG00000168404	MLKL	1.21641	0.817843	0.683333	0.651072	0.641138	0.650732
ENSG00000173660	UQCRH	-0.294971	0.817693	-0.0254815	0.146105	0.153512	0.577221
ENSG00000072121	ZFYVE26	-0.33073	0.817693	-0.0989994	0.376943	-0.188401	0.628533
ENSG00000143476	DTL	0.297407	0.81759	0.173723	0.589273	-0.0237529	0.110314
ENSG00000182107	TMEM30B	-0.484067	0.817495	-0.59911	0.847067	-0.353743	0.739448
ENSG00000131242	RAB11FIP4	-0.334023	0.817384	-0.0855861	0.343507	0.189482	0.635045
ENSG00000254297	AC091820.1	1.33779	0.817329	0.962991	0.71506	1.20345	0.791305
ENSG00000087263	OGFOD1	0.31933	0.817313	0.349741	0.834549	0.0540994	0.222888
ENSG00000068489	PRR11	-0.336102	0.817258	-0.518511	0.904077	-0.443425	0.881191
ENSG00000100241	SBF1	-0.32763	0.817029	-0.122673	0.437683	-0.0680404	0.29515
ENSG00000244509	APOBEC3C	0.809526	0.816966	0.901195	0.827863	0.93709	0.850291
ENSG00000057935	MTA3	-0.307369	0.816926	-0.19955	0.644853	-0.00966107	0.0640751
ENSG00000198393	ZNF26	-0.463392	0.816665	-0.0384347	0.142628	-0.481929	0.827152
ENSG00000197121	PGAP1	-0.309711	0.816231	-0.3912	0.870325	0.19816	0.670054
ENSG00000140807	NKD1	-0.986168	0.816223	-0.81458	0.775824	0.0810411	0.218597
ENSG00000109472	CPE	-0.487147	0.816191	-0.394709	0.749903	-0.445893	0.798694
ENSG00000176124	DLEU1	-0.612642	0.816144	-0.414477	0.716412	0.0733896	0.224215
ENSG00000112280	COL9A1	0.646669	0.816096	0.612072	0.788492	0.855865	0.875872
ENSG00000000003	TSPAN6	0.304423	0.816073	-0.0301398	0.140202	-0.45849	0.910968
ENSG00000198791	CNOT7	0.287786	0.816001	0.0797307	0.334988	-0.105091	0.457179
ENSG00000124496	TRERF1	-0.399078	0.815914	-0.119827	0.393341	-0.265724	0.69946
ENSG00000164284	GRPEL2	0.31272	0.815772	0.144006	0.502067	0.25832	0.759007
ENSG00000164484	TMEM200A	-0.465854	0.815646	-0.405425	0.770308	-0.250437	0.636318
ENSG00000137573	SULF1	-1.18064	0.815472	-0.586227	0.694853	0.314139	0.594512
ENSG00000101638	ST8SIA5	-1.71796	0.815456	-1.74239	0.803152	-1.38529	0.796703
ENSG00000129675	ARHGEF6	1.00498	0.815393	1.09941	0.82324	1.16366	0.850592
ENSG00000102743	SLC25A15	0.43967	0.815345	0.183079	0.492568	0.127322	0.393499
ENSG00000137337	MDC1	-0.34218	0.81533	-0.164899	0.532942	0.089125	0.359936
ENSG00000152082	MZT2B	0.416389	0.815266	0.359178	0.757229	0.414863	0.812951
ENSG00000181163	NPM1	0.278807	0.815251	0.180846	0.631813	0.266171	0.803476
ENSG00000251562	MALAT1	-0.284851	0.815243	-0.271248	0.791772	0.218255	0.73036
ENSG00000104756	KCTD9	0.392251	0.815235	-0.134863	0.402888	0.0276562	0.116099
ENSG00000184863	RBM33	-0.327535	0.815211	0.147739	0.519721	0.0306843	0.142849
ENSG00000185033	SEMA4B	-0.48155	0.815187	0.038691	0.140787	-0.266072	0.653403
ENSG00000176399	DMRTA1	0.757158	0.815069	0.310622	0.546424	0.982702	0.871233
ENSG00000149269	PAK1	-0.295884	0.814887	0.090167	0.364907	0.183036	0.636926
ENSG00000178904	DPY19L3	-0.300334	0.814887	-0.239806	0.724132	-0.437962	0.907934
ENSG00000109323	MANBA	0.346053	0.814816	0.0978549	0.352342	0.557154	0.920704
ENSG00000150995	ITPR1	-0.480112	0.814792	-0.10442	0.314464	0.208955	0.584484
ENSG00000144815	NXPE3	0.400379	0.814603	0.18146	0.516481	0.401802	0.816744
ENSG00000142552	RCN3	0.688256	0.814531	-0.0904034	0.217348	0.363852	0.636262
ENSG00000181885	CLDN7	0.318894	0.814508	0.206907	0.646386	-0.0188717	0.0990209
ENSG00000090975	PITPNM2	-1.09591	0.8145	-0.835584	0.764531	-0.879126	0.787504
ENSG00000280237	NA	-0.591043	0.814492	0.0593131	0.185026	0.383214	0.756628
ENSG00000145882	PCYOX1L	0.683992	0.814437	0.265611	0.521839	0.622729	0.793123
ENSG00000179632	MAF1	0.315917	0.814437	0.0713783	0.277804	-0.0820076	0.328231
ENSG00000132002	DNAJB1	0.321945	0.814437	-0.14851	0.508926	0.149528	0.538996
ENSG00000238266	LINC00707	-1.39008	0.814429	-1.96843	0.831609	-0.361068	0.576953
ENSG00000254277	AC009446.1	0.314141	0.814302	-0.07859	0.315049	0.0650803	0.297884
ENSG00000155974	GRIP1	-0.53535	0.814302	-0.363294	0.703032	-0.377811	0.733797
ENSG00000117724	CENPF	-0.282152	0.814144	-0.209637	0.693375	-0.159491	0.607402
ENSG00000198060	MARCHF5	-0.439009	0.814128	-0.123527	0.377504	-0.055572	0.213302
ENSG00000188897	AC099489.1	1.75473	0.814105	0.264469	0.310529	0.695706	0.549277
ENSG00000124279	FASTKD3	0.447283	0.814073	-0.0262263	0.0984361	-0.204743	0.526518
ENSG00000011454	RABGAP1	-0.331676	0.814065	-0.206504	0.640474	0.00935278	0.0595073
ENSG00000137288	UQCC2	0.372153	0.81367	0.337597	0.774536	0.59847	0.918974
ENSG00000008083	JARID2	-0.280163	0.813552	0.0114032	0.0656952	0.0809513	0.364678
ENSG00000079482	OPHN1	-0.654259	0.813544	-0.708911	0.813931	0.0790315	0.242131
ENSG00000183439	TRIM61	1.99298	0.813528	1.55745	0.721145	-0.105429	0.119291
ENSG00000104691	UBXN8	0.601254	0.813409	0.336606	0.631473	-0.376537	0.640388
ENSG00000172053	QARS1	-0.293576	0.813322	-0.331749	0.842673	-0.180369	0.641249
ENSG00000177181	RIMKLA	0.929742	0.813141	0.821642	0.768617	0.833008	0.78835
ENSG00000006652	IFRD1	0.329439	0.813101	0.333816	0.803223	-0.171044	0.56758
ENSG00000115504	EHBP1	0.325702	0.812983	0.460547	0.891417	0.434714	0.884597
ENSG00000258609	LINC-ROR	-0.780553	0.812927	-0.734324	0.789519	-0.687506	0.794751
ENSG00000031691	CENPQ	0.38605	0.812896	-0.0175068	0.077486	0.0915242	0.314994
ENSG00000142192	APP	-0.278192	0.812817	0.0177869	0.107334	-0.15349	0.581062
ENSG00000087077	TRIP6	0.327407	0.812793	0.443195	0.881799	0.218367	0.674172
ENSG00000196655	TRAPPC4	-0.352736	0.812516	-0.340105	0.79253	-0.509294	0.895795
ENSG00000169750	RAC3	0.330639	0.812477	-0.0102702	0.0539517	0.4558	0.896056
ENSG00000018236	CNTN1	-0.565944	0.812461	-0.40772	0.724528	-0.124348	0.355219
ENSG00000130227	XPO7	0.286291	0.812453	0.219986	0.69754	0.0876201	0.388908
ENSG00000182307	C8orf33	0.32594	0.812263	0.114028	0.398162	-0.26682	0.735299
ENSG00000111249	CUX2	-0.772402	0.812097	-0.775168	0.799256	-0.699219	0.79837
ENSG00000141295	SCRN2	-0.597249	0.81205	-1.1401	0.882771	-0.155154	0.428413
ENSG00000091129	NRCAM	0.888496	0.811971	0.517887	0.656715	0.931969	0.824979
ENSG00000185896	LAMP1	-0.298181	0.811939	-0.161664	0.562744	-0.516065	0.932511
ENSG00000058729	RIOK2	0.331358	0.811916	0.312424	0.780803	-0.139086	0.493065
ENSG00000092820	EZR	0.283111	0.811781	0.271004	0.787986	-0.0372233	0.203771
ENSG00000107077	KDM4C	-0.487172	0.811726	-0.656232	0.853413	-0.216824	0.574858
ENSG00000119698	PPP4R4	0.501149	0.811544	0.063884	0.182039	0.579754	0.847557
ENSG00000128833	MYO5C	0.326215	0.811481	0.263869	0.719122	-0.0505486	0.210488
ENSG00000105767	CADM4	0.657056	0.811481	0.758817	0.831222	0.893234	0.876955
ENSG00000196502	SULT1A1	1.3902	0.811442	0.774801	0.636926	0.678165	0.615873
ENSG00000178896	EXOSC4	0.511887	0.811418	0.305334	0.640561	-0.220853	0.517382
ENSG00000164076	CAMKV	-0.339359	0.811386	-0.286486	0.749073	-0.0684331	0.285572
ENSG00000108179	PPIF	0.31884	0.811118	0.51416	0.916461	0.104887	0.395641
ENSG00000165185	KIAA1958	-0.338704	0.811031	0.153287	0.511297	0.305649	0.798742
ENSG00000253816	AC138866.1	-0.925384	0.810936	-1.33683	0.839243	-0.958591	0.817195
ENSG00000201592	AL732366.1	0.576639	0.810936	0.605005	0.809403	0.527531	0.789899
ENSG00000187867	PALM3	-0.698404	0.810896	-0.719663	0.802235	0.0811795	0.237642
ENSG00000075643	MOCOS	0.569498	0.810817	0.297981	0.600835	-0.00884927	0.0374114
ENSG00000153046	CDYL	0.304859	0.810738	0.335162	0.837923	0.316703	0.829468
ENSG00000119285	HEATR1	0.276537	0.810517	0.165484	0.603679	0.101439	0.431709
ENSG00000184575	XPOT	0.275054	0.810367	0.318528	0.842886	0.243347	0.757996
ENSG00000121310	ECHDC2	-1.01071	0.810311	-1.38456	0.831617	-0.394446	0.635053
ENSG00000005436	GCFC2	0.383037	0.810272	0.0480006	0.177621	-0.184995	0.535455
ENSG00000054983	GALC	-0.478961	0.810248	-0.254922	0.607489	-0.383174	0.756115
ENSG00000124762	CDKN1A	0.653088	0.810209	0.0339859	0.0865583	1.67503	0.959586
ENSG00000116679	IVNS1ABP	-0.281786	0.81009	-0.312941	0.832573	0.297406	0.833111
ENSG00000274070	CASTOR2	-0.579902	0.809995	-0.42747	0.729427	-0.155031	0.430666
ENSG00000153993	SEMA3D	-0.891282	0.809924	-0.963339	0.806842	-1.27634	0.85248
ENSG00000076554	TPD52	0.36393	0.809924	0.173265	0.522218	0.274294	0.718601
ENSG00000174080	CTSF	-1.20891	0.809869	-1.19431	0.794791	-1.39504	0.826955
ENSG00000199102	MIR302C	0.608239	0.809829	0.499845	0.743889	-0.0186356	0.0611511
ENSG00000185052	SLC24A3	-1.01899	0.809703	-0.587404	0.708572	-1.30231	0.838572
ENSG00000172009	THOP1	0.307374	0.809648	0.134159	0.46976	-0.0549089	0.223512
ENSG00000121022	COPS5	0.322232	0.809237	0.0236127	0.0956464	-0.264428	0.731348
ENSG00000101825	MXRA5	-1.18453	0.809023	-1.25286	0.801547	-0.66292	0.727151
ENSG00000205269	TMEM170B	-0.523218	0.808905	-0.493161	0.783355	-0.230764	0.576992
ENSG00000115368	WDR75	0.293581	0.808723	0.22311	0.693091	-0.0852216	0.382325
ENSG00000146409	SLC18B1	-0.360449	0.808604	-0.621456	0.908534	-0.461638	0.867551
ENSG00000159921	GNE	0.5585	0.808502	0.600209	0.81284	0.916011	0.906543
ENSG00000142549	IGLON5	-0.690217	0.808486	-0.542735	0.749445	-0.126495	0.34632
ENSG00000049245	VAMP3	0.359863	0.808423	0.317308	0.75734	0.354375	0.802899
ENSG00000076067	RBMS2	0.542416	0.808399	1.17885	0.936391	1.27704	0.950861
ENSG00000167114	SLC27A4	-0.452898	0.808352	-0.464426	0.801152	-0.664044	0.878535
ENSG00000155886	SLC24A2	-1.04075	0.80828	-0.575524	0.700085	-0.375688	0.618292
ENSG00000278272	NA	-0.297694	0.808194	-0.506903	0.923241	-0.293364	0.79973
ENSG00000119979	DENND10	0.34179	0.808114	-0.0938728	0.322138	0.324744	0.791464
ENSG00000101350	KIF3B	-0.340907	0.808114	-0.122613	0.423079	0.170509	0.577869
ENSG00000169744	LDB2	-0.374958	0.807941	-0.603027	0.896127	0.295454	0.764887
ENSG00000133119	RFC3	0.299978	0.807917	0.209636	0.661567	-0.0160572	0.101423
ENSG00000162688	AGL	-0.433828	0.807877	-0.576664	0.855057	-0.33603	0.744197
ENSG00000157502	PWWP3B	1.48478	0.80787	0.50745	0.504366	0.636678	0.574155
ENSG00000185305	ARL15	-0.530971	0.807735	-0.333884	0.674021	-0.0223275	0.0784264
ENSG00000167779	IGFBP6	1.37688	0.807735	1.00825	0.708209	1.10835	0.750923
ENSG00000175643	RMI2	0.363038	0.807688	0.0911047	0.311114	0.695656	0.940137
ENSG00000247134	AC090204.1	0.453547	0.807474	0.0135743	0.045243	0.224804	0.572124
ENSG00000107821	KAZALD1	-1.93066	0.807364	-1.883	0.791424	-1.26132	0.767447
ENSG00000117245	KIF17	1.01295	0.807356	0.621149	0.666111	1.83612	0.92758
ENSG00000231925	TAPBP	-0.40637	0.807332	-0.185386	0.53717	0.0607659	0.22544
ENSG00000156052	GNAQ	-0.291605	0.807332	-0.109259	0.428564	-0.218097	0.711496
ENSG00000147592	LACTB2	0.480228	0.807324	-0.45269	0.728226	0.305366	0.671777
ENSG00000130024	PHF10	-0.349886	0.807293	-0.130834	0.442314	-0.147019	0.512696
ENSG00000205664	NA	0.692814	0.807277	0.808599	0.829855	0.789331	0.838398
ENSG00000188984	AADACL3	1.48489	0.807261	0.77644	0.61091	1.85268	0.866658
ENSG00000065833	ME1	0.53803	0.807237	0.440342	0.737441	0.00785268	0.0358941
ENSG00000139684	ESD	0.322186	0.806897	0.00867052	0.0526794	0.174927	0.580596
ENSG00000117748	RPA2	0.317514	0.806708	0.26363	0.723935	0.0895725	0.356507
ENSG00000158220	ESYT3	0.531117	0.806645	0.0134485	0.0419712	-0.0562817	0.172255
ENSG00000188801	ZNF322P1	-0.632111	0.80651	-0.250093	0.548922	-0.140584	0.379314
ENSG00000111907	TPD52L1	-0.895503	0.8064	-0.840344	0.783324	-0.100357	0.260378
ENSG00000152804	HHEX	-1.67217	0.806242	-1.69085	0.793463	-0.875829	0.731205
ENSG00000197045	GMFB	0.283687	0.806202	-0.0306275	0.145844	0.049078	0.240392
ENSG00000048707	VPS13D	-0.293537	0.806099	-0.0453092	0.21926	0.288757	0.811513
ENSG00000197724	PHF2	-0.503363	0.806083	-0.211832	0.531267	-0.420477	0.767447
ENSG00000083520	DIS3	0.292509	0.806012	0.13769	0.511352	-0.0177195	0.106663
ENSG00000100522	GNPNAT1	0.303802	0.805997	-0.0157915	0.0941923	0.301963	0.806747
ENSG00000109534	GAR1	0.455331	0.805957	0.432123	0.776488	0.187727	0.507101
ENSG00000225470	JPX	0.39822	0.805807	0.119701	0.368693	0.518326	0.870933
ENSG00000279114	Z99129.3	-0.852896	0.805625	-1.49676	0.854179	-0.954461	0.822245
ENSG00000120437	ACAT2	0.284642	0.805554	0.500965	0.938248	-0.427878	0.910684
ENSG00000164944	VIRMA	0.291597	0.805483	-0.128598	0.479971	-0.0911876	0.381116
ENSG00000160049	DFFA	0.287826	0.805467	-0.0185655	0.100246	0.199239	0.672457
ENSG00000146530	VWDE	-0.313606	0.805143	-0.783579	0.958463	-0.149882	0.544883
ENSG00000205726	ITSN1	-0.292403	0.805135	-0.109208	0.426849	-0.0350481	0.194233
ENSG00000170921	TANC2	-0.545661	0.805096	-0.162894	0.425505	0.131073	0.384941
ENSG00000183665	TRMT12	0.445056	0.805064	0.266514	0.623262	0.185247	0.510815
ENSG00000104218	CSPP1	0.33878	0.804977	-0.349575	0.779941	-0.442257	0.851477
ENSG00000204406	MBD5	-0.406831	0.804938	-0.251633	0.637693	0.2083	0.609235
ENSG00000144229	THSD7B	-0.800526	0.804732	-1.56949	0.864722	-0.874377	0.818775
ENSG00000143499	SMYD2	-0.750167	0.804701	-0.176557	0.416583	-0.140746	0.359423
ENSG00000155975	VPS37A	0.344523	0.804542	-0.154074	0.479299	0.0411025	0.168691
ENSG00000088882	CPXM1	-0.493589	0.804542	-0.369642	0.718245	-0.346158	0.718134
ENSG00000102882	MAPK3	-0.517824	0.804535	-0.620574	0.825216	-0.381697	0.731988
ENSG00000130772	MED18	0.749595	0.804448	0.645802	0.753483	0.818383	0.826899
ENSG00000089486	CDIP1	0.375021	0.804432	0.646111	0.913845	0.873239	0.954386
ENSG00000078246	TULP3	0.434965	0.804345	0.543855	0.84879	0.408841	0.7908
ENSG00000157985	AGAP1	-0.317107	0.804305	-0.235704	0.691874	-0.0389257	0.182213
ENSG00000196227	FAM217B	0.414917	0.804163	0.737985	0.915828	0.851257	0.940263
ENSG00000167562	ZNF701	-0.487383	0.8041	-0.287118	0.643572	-0.217407	0.568102
ENSG00000237289	CKMT1B	0.736047	0.804013	-0.161421	0.331779	0.0497901	0.126412
ENSG00000130522	JUND	0.458801	0.804005	0.410361	0.758715	0.625598	0.876473
ENSG00000167191	GPRC5B	-0.299948	0.803926	-0.117557	0.447419	-0.0194161	0.106149
ENSG00000100764	PSMC1	0.285921	0.803855	0.373938	0.866879	0.0727106	0.310379
ENSG00000172590	MRPL52	0.337897	0.80376	0.246062	0.681995	0.199036	0.617312
ENSG00000103653	CSK	-0.466652	0.803547	0.00514753	0.0364394	-0.233978	0.595729
ENSG00000100263	RHBDD3	0.351857	0.803531	0.0560638	0.216495	-0.260236	0.688436
ENSG00000204065	TCEAL5	1.33092	0.803491	1.17135	0.755562	1.34801	0.808865
ENSG00000151893	CACUL1	0.285452	0.80342	0.292428	0.792918	0.323973	0.834209
ENSG00000147684	NDUFB9	0.290546	0.803381	0.0934139	0.360174	-0.0517009	0.230696
ENSG00000198901	PRC1	-0.301704	0.803318	-0.396854	0.872798	-0.0698004	0.305076
ENSG00000277534	AC007996.1	-0.622998	0.803231	-0.699665	0.809742	-0.48713	0.756478
ENSG00000163961	RNF168	-0.293327	0.803183	-0.141947	0.51253	0.0729928	0.314069
ENSG00000081842	PCDHA6	-0.98271	0.803128	-0.260585	0.500122	-0.954465	0.801065
ENSG00000151090	THRB	-1.00389	0.803104	-1.11138	0.802227	-0.0695387	0.183714
ENSG00000105821	DNAJC2	0.309833	0.803025	0.41293	0.87317	-0.131802	0.479955
ENSG00000136237	RAPGEF5	0.369776	0.803017	0.0737023	0.244652	-0.226451	0.621619
ENSG00000157216	SSBP3	-0.31725	0.802954	-0.0286519	0.131746	-0.21168	0.662065
ENSG00000173705	SUSD5	0.676422	0.802741	0.210101	0.435779	0.063155	0.15841
ENSG00000277161	PIGW	0.390034	0.802725	0.567206	0.882676	0.0632775	0.216226
ENSG00000104687	GSR	0.290798	0.802614	0.0180146	0.0988786	-0.0275262	0.146658
ENSG00000055118	KCNH2	-1.14132	0.802496	-0.997348	0.771264	-0.25837	0.495152
ENSG00000171045	TSNARE1	0.617	0.802488	-0.0992661	0.243474	-0.0231461	0.0645809
ENSG00000204531	POU5F1	-0.270819	0.802353	-0.195733	0.674472	0.0156793	0.116541
ENSG00000187244	BCAM	0.514928	0.802195	0.45286	0.752977	0.483104	0.787544
ENSG00000169288	MRPL1	0.36525	0.802085	0.282495	0.697737	-0.373948	0.778677
ENSG00000138623	SEMA7A	-0.522168	0.801974	-0.80077	0.859292	-0.238633	0.583433
ENSG00000156298	TSPAN7	-1.00462	0.801848	-0.857325	0.766507	-0.564375	0.709908
ENSG00000169783	LINGO1	-0.410248	0.8018	-0.154122	0.452675	-0.858056	0.919005
ENSG00000214367	HAUS3	0.40358	0.801784	0.220026	0.576447	0.0985605	0.325133
ENSG00000160691	SHC1	0.283868	0.801769	0.432113	0.909135	0.314009	0.833127
ENSG00000187984	ANKRD19P	-1.65717	0.801698	-1.91326	0.800631	-1.16552	0.766285
ENSG00000160336	ZNF761	-0.323976	0.801666	-0.409576	0.858194	-0.204988	0.642237
ENSG00000204514	ZNF814	0.298117	0.801563	0.466996	0.908329	0.122736	0.466109
ENSG00000134686	PHC2	-0.728451	0.801492	-0.988935	0.830005	-0.648609	0.784138
ENSG00000196305	IARS1	0.267727	0.801358	0.122991	0.472834	0.0752101	0.364259
ENSG00000139496	NUP58	0.283536	0.801089	-0.0436432	0.185389	0.0111761	0.0671493
ENSG00000169436	COL22A1	0.781622	0.801057	-0.208033	0.387865	0.3028	0.531962
ENSG00000275215	RNA5-8SN3	0.775511	0.801057	-1.17742	0.748718	-1.66968	0.801919
ENSG00000198663	C6orf89	-0.421417	0.800899	-0.325698	0.716712	-0.159547	0.485692
ENSG00000187742	SECISBP2	-0.28721	0.80086	-0.300794	0.800623	-0.229909	0.722062
ENSG00000100418	DESI1	0.33474	0.800844	0.295796	0.754384	0.0723531	0.276808
ENSG00000120742	SERP1	0.276201	0.800765	0.24438	0.732422	0.14097	0.543508
ENSG00000107331	ABCA2	-0.709234	0.800575	-1.30359	0.861545	-0.237158	0.526952
ENSG00000251322	SHANK3	-1.05123	0.800544	-1.02442	0.783142	-0.0551845	0.153644
ENSG00000137968	SLC44A5	0.737755	0.800488	0.263667	0.486166	0.621666	0.759774
ENSG00000123684	LPGAT1	-0.330785	0.800378	-0.596378	0.916532	-0.318841	0.792167
ENSG00000166033	HTRA1	-1.14674	0.800378	-0.899941	0.754929	-0.866884	0.765914
ENSG00000169251	NMD3	0.293067	0.800362	-0.101353	0.386569	0.0919607	0.378239
ENSG00000076351	SLC46A1	0.653249	0.800346	0.652563	0.786453	-0.116718	0.281147
ENSG00000198740	ZNF652	-0.317996	0.80022	-0.127523	0.456579	0.158013	0.563028
ENSG00000107968	MAP3K8	-1.05284	0.800204	-0.916251	0.767834	-0.603548	0.715519
ENSG00000164692	COL1A2	0.281572	0.800046	0.0720379	0.296336	0.56901	0.953342
ENSG00000136875	PRPF4	0.307757	0.800046	0.262043	0.72674	-0.0721063	0.289357
ENSG00000224877	NDUFAF8	0.508025	0.80003	0.802282	0.88632	0.1174	0.329424
ENSG00000131748	STARD3	-0.395772	0.800006	-0.244669	0.625009	-0.291731	0.709267

## Sheet: pG_WT1_iPSCs pp > 0.8
ENSG	genes	log2FC_pG_WT1	Posterior_probability_pG	log2FC_cG13_WT1	Posterior_probability_cG13	log2FC_cG50_WT1	Posterior_probability_cG50
ENSG00000107201	DDX58	-0.511782	0.899794	-0.62903	0.927588	-1.23592	0.971369
ENSG00000102804	TSC22D1	0.421563	0.89977	-0.0994318	0.40755	0.116112	0.47643
ENSG00000171766	GATM	1.104	0.899762	1.13538	0.902623	1.51157	0.942255
ENSG00000128052	KDR	-0.407529	0.899565	-0.238212	0.746039	0.435153	0.916698
ENSG00000184588	PDE4B	0.780064	0.899407	0.754576	0.892152	1.13281	0.946341
ENSG00000111674	ENO2	0.47759	0.899304	-0.351265	0.804756	0.130516	0.470551
ENSG00000121691	CAT	1.01028	0.899051	0.085804	0.22917	0.054659	0.142747
ENSG00000197971	MBP	-0.701643	0.898964	-0.622583	0.881562	-0.612547	0.880472
ENSG00000213853	EMP2	0.727689	0.898545	0.663659	0.880527	0.852426	0.921471
ENSG00000198586	TLK1	0.415764	0.898521	-0.103303	0.407637	0.240398	0.736935
ENSG00000019582	CD74	1.11512	0.898427	1.10792	0.89559	1.41525	0.932535
ENSG00000101126	ADNP	0.39934	0.89815	0.040866	0.195987	0.0327422	0.156418
ENSG00000124374	PAIP2B	0.470765	0.898055	-0.502514	0.888343	0.391194	0.856653
ENSG00000225366	TDGF1P3	0.886879	0.897984	0.696338	0.852496	1.2481	0.942595
ENSG00000196411	EPHB4	-0.406413	0.897826	0.00755491	0.0633085	-0.174758	0.617185
ENSG00000155380	SLC16A1	0.379765	0.897589	-0.395437	0.907815	0.448016	0.929389
ENSG00000230623	AC104461.1	0.692947	0.897455	0.5523	0.852464	1.06864	0.951422
ENSG00000143333	RGS16	1.41898	0.897368	1.25644	0.872885	1.91484	0.942168
ENSG00000198382	UVRAG	0.540004	0.897344	-0.246827	0.654502	-0.887556	0.925201
ENSG00000074657	ZNF532	0.39411	0.897099	-0.103858	0.424557	0.176604	0.646275
ENSG00000070756	PABPC1	0.380311	0.897059	0.190316	0.672575	-0.00438624	0.0247513
ENSG00000269821	KCNQ1OT1	0.397213	0.897028	-0.682839	0.963308	-0.53985	0.940556
ENSG00000147155	EBP	-0.48696	0.89702	-0.0669584	0.28441	-0.0335321	0.142747
ENSG00000118276	B4GALT6	-0.531087	0.896617	0.442061	0.881388	-0.985896	0.956385
ENSG00000196218	RYR1	0.793022	0.89653	0.196679	0.493856	0.97295	0.925643
ENSG00000188848	BEND4	0.441081	0.896411	-0.506407	0.906511	0.627322	0.9503
ENSG00000103742	IGDCC4	-1.18305	0.896411	-1.54132	0.912146	-0.854009	0.864801
ENSG00000181222	POLR2A	0.407503	0.896403	-0.0821909	0.34263	-0.357817	0.857514
ENSG00000080298	RFX3	0.480167	0.896372	-0.348613	0.798853	-0.0672493	0.273939
ENSG00000256537	SMIM10L1	0.531478	0.896214	0.226622	0.645414	0.0112468	0.052063
ENSG00000197905	TEAD4	0.492617	0.89619	0.999067	0.974917	0.183884	0.581283
ENSG00000204217	BMPR2	-0.515021	0.896095	0.193305	0.612965	-1.09745	0.963576
ENSG00000061794	MRPS35	-0.451294	0.89604	-0.144339	0.517825	-0.136767	0.520203
ENSG00000198719	DLL1	-1.51362	0.895898	-2.46193	0.917883	-2.54182	0.920349
ENSG00000100403	ZC3H7B	0.411788	0.89589	0.196077	0.667478	0.103475	0.417958
ENSG00000187244	BCAM	0.799597	0.895827	0.441173	0.758683	0.251641	0.578146
ENSG00000095015	MAP3K1	-0.465824	0.895779	-0.133801	0.482879	-0.393963	0.858328
ENSG00000002586	CD99	-0.678885	0.895716	-0.456356	0.828053	0.287594	0.728163
ENSG00000142599	RERE	0.43283	0.895708	-0.193847	0.626945	-0.451198	0.890848
ENSG00000135506	OS9	-0.443055	0.8957	-0.506169	0.919155	-0.570937	0.934992
ENSG00000170561	IRX2	-0.477257	0.895542	-1.5368	0.979319	-1.10608	0.971179
ENSG00000178222	RNF212	2.12704	0.895455	0.099545	0.160638	0.439628	0.476335
ENSG00000122674	CCZ1	-0.58343	0.895431	-0.536658	0.881791	-0.458341	0.853895
ENSG00000112576	CCND3	-0.865192	0.895416	-0.656574	0.860122	-0.588292	0.844989
ENSG00000145725	PPIP5K2	0.408121	0.895305	0.244486	0.737694	0.1989	0.670505
ENSG00000162616	DNAJB4	0.729986	0.895265	0.597749	0.856392	0.984196	0.936043
ENSG00000120686	UFM1	-0.46819	0.895265	0.150014	0.538885	-0.267275	0.752021
ENSG00000260266	PPIAP46	-2.55765	0.895218	0.526506	0.777341	-2.81018	0.898355
ENSG00000125266	EFNB2	-0.823321	0.895163	0.93914	0.952236	-0.259808	0.64034
ENSG00000119812	FAM98A	-0.421619	0.895139	-0.416729	0.893796	-0.619301	0.950956
ENSG00000127152	BCL11B	-0.732816	0.895107	-0.779395	0.900102	-1.6035	0.948253
ENSG00000150593	PDCD4	0.681742	0.895044	0.0634424	0.197022	0.349365	0.730052
ENSG00000168610	STAT3	-0.416928	0.894704	-0.33806	0.844309	-0.159225	0.585187
ENSG00000157851	DPYSL5	-0.72941	0.894681	-2.259	0.957412	-1.27937	0.938873
ENSG00000214776	AC092821.2	-2.54286	0.894625	-2.66587	0.894523	-2.63021	0.895755
ENSG00000133612	AGAP3	-0.580669	0.894483	-1.24496	0.956274	-0.631416	0.905397
ENSG00000130748	TMEM160	0.804306	0.894475	0.153349	0.396771	0.489147	0.788666
ENSG00000134769	DTNA	0.815225	0.89438	1.89944	0.978323	1.29701	0.952157
ENSG00000119711	ALDH6A1	0.545428	0.894341	-0.508426	0.844902	0.193436	0.569982
ENSG00000182580	EPHB3	-1.73153	0.89427	-1.68361	0.890864	-2.23331	0.907096
ENSG00000124942	AHNAK	-0.388715	0.894262	0.133426	0.519326	-1.70763	0.996143
ENSG00000051596	THOC3	0.549977	0.894207	0.448359	0.849864	0.551572	0.893977
ENSG00000198792	TMEM184B	-0.451235	0.894135	-0.619443	0.939734	-0.740482	0.95595
ENSG00000204634	TBC1D8	-0.524017	0.894128	-1.0665	0.959823	-0.977504	0.955919
ENSG00000181744	DIPK2A	-0.500546	0.893835	0.493083	0.908005	-0.413107	0.855041
ENSG00000176597	B3GNT5	-0.662881	0.89378	-0.876755	0.921763	-1.01161	0.933594
ENSG00000105559	PLEKHA4	1.31362	0.89378	0.234997	0.432001	1.11186	0.862137
ENSG00000230316	FEZF1-AS1	-1.60183	0.893614	-2.67021	0.915402	-2.31081	0.91183
ENSG00000111913	RIPOR2	-0.744835	0.893566	-1.51998	0.943322	0.842479	0.947321
ENSG00000275832	ARHGAP23	0.575836	0.893424	1.19947	0.972301	1.30584	0.976853
ENSG00000108557	RAI1	-1.38804	0.893329	-2.4446	0.920127	-2.29729	0.919187
ENSG00000168175	MAPK1IP1L	-0.40385	0.893298	-0.349146	0.860494	-0.375873	0.880732
ENSG00000163683	SMIM14	-0.503599	0.893274	-1.0153	0.961482	-0.956032	0.958811
ENSG00000112992	NNT	-0.521376	0.893274	-0.88713	0.949328	-0.975641	0.955539
ENSG00000151151	IPMK	-0.516661	0.893274	-0.272876	0.726021	-0.597903	0.914145
ENSG00000008516	MMP25	-0.644793	0.893242	-1.81083	0.959815	-1.26575	0.948032
ENSG00000172493	AFF1	-0.385232	0.892808	-0.370243	0.88025	-0.958543	0.986874
ENSG00000176834	VSIG10	-0.403497	0.89261	0.0253823	0.150072	-0.682628	0.963979
ENSG00000081842	PCDHA6	0.946502	0.892326	-1.61469	0.85331	-1.80639	0.863994
ENSG00000267374	MIR924HG	-1.39697	0.892017	-3.15448	0.926434	-0.936098	0.855341
ENSG00000102119	EMD	0.558509	0.891788	0.0840657	0.280846	0.184214	0.54109
ENSG00000140988	RPS2	0.36613	0.891788	0.0467537	0.243332	0.180613	0.655055
ENSG00000183150	GPR19	1.13917	0.891654	1.08492	0.880898	0.333391	0.576502
ENSG00000162636	FAM102B	-0.455207	0.891417	-0.636792	0.937569	-0.861913	0.961917
ENSG00000152503	TRIM36	-0.667722	0.891322	-0.384077	0.780811	-0.821611	0.913734
ENSG00000184344	GDF3	-0.940997	0.891117	0.26259	0.639273	-2.19431	0.939766
ENSG00000146833	TRIM4	1.34547	0.891077	0.869571	0.793803	1.60852	0.919954
ENSG00000198879	SFMBT2	-0.467883	0.891006	-1.22263	0.973652	-1.05681	0.969227
ENSG00000091127	PUS7	0.414768	0.890919	0.36787	0.865077	0.507882	0.929295
ENSG00000254122	PCDHGB7	-1.83625	0.890887	-0.981787	0.834525	-1.08236	0.848434
ENSG00000171345	KRT19	0.448922	0.89069	0.853187	0.970365	0.721436	0.957594
ENSG00000108370	RGS9	1.15139	0.890666	1.09815	0.880076	1.48306	0.928876
ENSG00000153767	GTF2E1	-0.455716	0.890658	-0.426753	0.876504	0.471849	0.908827
ENSG00000099977	DDT	0.59994	0.890469	0.25648	0.649302	0.368797	0.773177
ENSG00000058453	CROCC	0.487292	0.890397	-0.0890037	0.32616	0.0652265	0.266092
ENSG00000241015	TPM3P9	-0.980704	0.890042	-0.887691	0.878069	-1.42746	0.917069
ENSG00000122068	FYTTD1	-0.446758	0.890002	-0.56302	0.924395	-0.890115	0.965339
ENSG00000187231	SESTD1	-0.453374	0.8899	-0.494639	0.903856	-0.42649	0.880076
ENSG00000110492	MDK	-0.391348	0.889868	-1.25819	0.991252	-1.03761	0.987522
ENSG00000134109	EDEM1	-0.552887	0.88986	-0.698563	0.919622	-0.727208	0.924932
ENSG00000111110	PPM1H	0.461989	0.889813	1.03837	0.978923	0.559565	0.923581
ENSG00000103365	GGA2	0.395907	0.88971	-0.0667673	0.302563	0.301566	0.813812
ENSG00000111684	LPCAT3	0.561536	0.889678	0.0768889	0.272999	-0.0966886	0.329495
ENSG00000157227	MMP14	-0.40922	0.889583	-0.0178851	0.105383	-0.156229	0.583986
ENSG00000170345	FOS	0.797459	0.88952	0.805098	0.88952	-0.389666	0.672528
ENSG00000111885	MAN1A1	-0.711922	0.889512	-0.735351	0.89201	-1.24302	0.93583
ENSG00000143772	ITPKB	-0.800179	0.889394	-0.466525	0.800212	-1.18454	0.922095
ENSG00000206573	THUMPD3-AS1	0.605755	0.889338	0.641883	0.896917	0.741563	0.920499
ENSG00000164142	FAM160A1	0.460325	0.889315	-0.155209	0.527324	-0.0389808	0.171275
ENSG00000148481	MINDY3	0.745323	0.889204	0.733091	0.88421	0.631843	0.857601
ENSG00000130741	EIF2S3	0.374323	0.889157	0.370992	0.888177	0.412201	0.910897
ENSG00000148357	HMCN2	0.652372	0.88907	-1.59204	0.919606	0.144166	0.413833
ENSG00000033867	SLC4A7	0.374448	0.889054	-0.61802	0.965686	0.202707	0.691882
ENSG00000028528	SNX1	0.457672	0.888991	0.20909	0.643454	0.243198	0.698662
ENSG00000250251	PKD1P6	0.8789	0.888912	0.251708	0.541675	0.164233	0.39926
ENSG00000121454	LHX4	-0.797017	0.888817	-3.0272	0.954749	-0.543996	0.832842
ENSG00000123104	ITPR2	-0.365909	0.888698	-0.946447	0.990098	-0.912048	0.988762
ENSG00000105974	CAV1	-0.982888	0.888564	2.44908	0.993133	0.383085	0.762105
ENSG00000101098	RIMS4	0.536176	0.888564	-0.0545395	0.187658	0.718165	0.932993
ENSG00000128791	TWSG1	-0.492313	0.888548	-0.213982	0.642814	-0.633239	0.924561
ENSG00000133134	BEX2	0.705242	0.88854	0.62385	0.863007	1.01187	0.938217
ENSG00000183166	CALN1	0.831745	0.888517	-0.139619	0.349592	0.563362	0.807261
ENSG00000143320	CRABP2	-0.464354	0.888256	-0.0243988	0.101803	0.521554	0.924142
ENSG00000264364	DYNLL2	0.394642	0.888137	0.0778678	0.345395	0.221605	0.711164
ENSG00000205181	LINC00654	2.42746	0.888035	1.98497	0.830898	2.10988	0.851034
ENSG00000133812	SBF2	0.408839	0.888027	-0.274258	0.759608	0.128992	0.497222
ENSG00000124493	GRM4	-0.570463	0.887971	0.204989	0.608334	-0.619212	0.899525
ENSG00000255192	NANOGP8	-0.821947	0.887955	0.452043	0.825967	-1.49026	0.931578
ENSG00000248632	NA	2.49882	0.887908	2.66392	0.901311	-0.135427	0.155359
ENSG00000020181	ADGRA2	-0.843619	0.8879	-1.80653	0.937166	-1.87894	0.939544
ENSG00000204959	ARHGEF34P	-1.21527	0.887884	-0.954085	0.862564	-1.4083	0.898276
ENSG00000114126	TFDP2	0.404935	0.887671	-0.000208711	0.0107082	0.398929	0.886675
ENSG00000133124	IRS4	0.848828	0.887521	0.936707	0.901327	0.182489	0.439722
ENSG00000130787	HIP1R	-0.583679	0.887442	-1.45384	0.957642	-1.48332	0.958843
ENSG00000163735	CXCL5	0.951079	0.887205	1.14307	0.913829	2.1504	0.976703
ENSG00000148200	NR6A1	0.368093	0.887134	-0.447461	0.922917	0.548358	0.954267
ENSG00000172197	MBOAT1	-0.695543	0.88711	-0.5489	0.849303	-0.915336	0.914793
ENSG00000136888	ATP6V1G1	-0.399544	0.886912	-0.209535	0.68733	-0.296132	0.812018
ENSG00000196227	FAM217B	0.586887	0.886897	0.636062	0.89913	0.461901	0.834178
ENSG00000166341	DCHS1	-0.512897	0.886873	-0.697946	0.927358	-0.84382	0.944397
ENSG00000168461	RAB31	-0.43245	0.886778	0.31657	0.822158	-0.461965	0.898577
ENSG00000136720	HS6ST1	0.433157	0.886699	0.526223	0.923059	0.414683	0.875651
ENSG00000100077	GRK3	0.423256	0.886667	-0.0714647	0.289342	0.16397	0.567461
ENSG00000149418	ST14	-0.521349	0.886652	-0.413591	0.838406	-0.871446	0.944065
ENSG00000141314	RHBDL3	-0.706775	0.886652	-1.81094	0.949075	-1.00782	0.920388
ENSG00000119537	KDSR	-0.56508	0.886517	0.354453	0.804021	0.00541429	0.0437731
ENSG00000106785	TRIM14	1.25944	0.886098	1.55079	0.91865	1.04319	0.848806
ENSG00000078246	TULP3	0.616707	0.886051	0.286079	0.673666	0.353162	0.743937
ENSG00000089280	FUS	0.378036	0.885996	-0.11792	0.480571	-0.18586	0.657513
ENSG00000171735	CAMTA1	0.539026	0.885695	0.0990434	0.335272	0.425113	0.83432
ENSG00000153006	SREK1IP1	-0.425632	0.8856	-0.224982	0.686334	-0.460586	0.897826
ENSG00000066382	MPPED2	1.30761	0.885356	0.494	0.643074	0.203903	0.383945
ENSG00000130779	CLIP1	-0.441469	0.885316	-0.3537	0.830787	-0.682577	0.945677
ENSG00000179299	NSUN7	0.561958	0.885261	-0.317787	0.70417	-0.294581	0.680581
ENSG00000166598	HSP90B1	-0.363994	0.884952	-0.0934134	0.398075	-0.292446	0.826883
ENSG00000133710	SPINK5	0.608665	0.884866	-0.379132	0.72904	-1.49934	0.924885
ENSG00000183087	GAS6	-0.719258	0.884707	-1.30468	0.932693	-0.214302	0.573381
ENSG00000102763	VWA8	0.440176	0.884613	0.105927	0.407803	-0.0813562	0.317689
ENSG00000262943	ALOX12P2	1.08095	0.884605	0.823004	0.827381	0.575529	0.743012
ENSG00000075213	SEMA3A	-0.466255	0.88436	0.585762	0.937395	0.394767	0.862295
ENSG00000160191	PDE9A	-0.689044	0.884312	-0.373184	0.75896	-0.568938	0.855957
ENSG00000162407	PLPP3	0.446761	0.884218	-0.349582	0.801034	-0.0936753	0.347008
ENSG00000146350	TBC1D32	0.567117	0.884186	0.176686	0.516529	0.0112896	0.0481591
ENSG00000175928	LRRN1	0.376695	0.884004	0.287613	0.809853	0.420519	0.905002
ENSG00000110723	EXPH5	-0.552676	0.883996	-0.623276	0.899904	-0.833678	0.932068
ENSG00000159217	IGF2BP1	0.359598	0.883688	-0.0149583	0.0689985	0.0345081	0.161468
ENSG00000078549	ADCYAP1R1	0.70892	0.883443	0.666666	0.870293	1.07081	0.940603
ENSG00000065911	MTHFD2	0.365162	0.883364	1.0063	0.991465	0.446891	0.922878
ENSG00000150625	GPM6A	-1.21341	0.883143	-1.94097	0.911016	-1.51245	0.898679
ENSG00000160284	SPATC1L	1.08857	0.883135	0.782353	0.812279	1.33337	0.915338
ENSG00000153012	LGI2	-0.748281	0.883103	-1.64179	0.939054	-0.869865	0.898719
ENSG00000213214	ARHGEF35	-1.2962	0.883024	-1.13074	0.869274	-1.5088	0.893883
ENSG00000054598	FOXC1	-1.0902	0.883016	-2.83477	0.931373	-3.28662	0.935893
ENSG00000137713	PPP2R1B	-0.381764	0.883	-0.338413	0.854551	-0.441415	0.911845
ENSG00000122490	SLC66A2	-1.09502	0.882969	-1.01896	0.874228	-0.521407	0.776551
ENSG00000165804	ZNF219	0.441444	0.882763	-0.565257	0.905887	0.0995745	0.382388
ENSG00000184216	IRAK1	0.506658	0.882653	1.01245	0.967338	1.08658	0.972032
ENSG00000163032	VSNL1	-0.460652	0.882629	0.317747	0.8064	-0.333075	0.803626
ENSG00000071242	RPS6KA2	-0.645117	0.882384	-0.600185	0.86985	-1.1952	0.937339
ENSG00000196581	AJAP1	-0.834706	0.882266	-0.534258	0.812216	-1.74532	0.933601
ENSG00000163191	S100A11	-0.669556	0.88225	0.939689	0.957499	1.14057	0.971487
ENSG00000090621	PABPC4	0.373535	0.882234	0.188842	0.661543	0.254769	0.767526
ENSG00000006831	ADIPOR2	0.41201	0.882171	0.111208	0.425853	-0.0851241	0.361351
ENSG00000261409	AL035425.4	0.936176	0.882115	0.95854	0.884059	0.0711718	0.186543
ENSG00000104447	TRPS1	-0.529451	0.881973	-0.221886	0.634816	-0.695742	0.919061
ENSG00000111962	UST	0.432543	0.881957	0.380744	0.850568	0.509601	0.913537
ENSG00000167978	SRRM2	0.357508	0.881863	-0.268271	0.79728	-0.356055	0.879152
ENSG00000130517	PGPEP1	-0.620646	0.881863	0.0888319	0.313571	0.146257	0.480113
ENSG00000119547	ONECUT2	0.800563	0.881815	0.591259	0.816594	-0.24362	0.518559
ENSG00000105202	FBL	0.380027	0.881791	0.196226	0.671904	0.264757	0.77241
ENSG00000179364	PACS2	-0.476995	0.881776	-0.734002	0.936905	-0.42632	0.859711
ENSG00000146112	PPP1R18	-0.754954	0.881752	-0.393661	0.755514	-0.218754	0.575791
ENSG00000069188	SDK2	-0.702422	0.881704	-1.54191	0.940682	-0.976902	0.914572
ENSG00000204604	ZNF468	-0.558727	0.881317	0.330651	0.782304	-0.490604	0.85787
ENSG00000128596	CCDC136	0.523176	0.881309	-0.397068	0.7856	-0.0215693	0.0857996
ENSG00000130255	RPL36	0.358125	0.881301	0.269753	0.798236	0.30488	0.832518
ENSG00000076108	BAZ2A	0.389253	0.881238	0.0580898	0.263729	0.274493	0.777112
ENSG00000168476	REEP4	-0.997887	0.881222	-0.823803	0.857791	-1.28225	0.901422
ENSG00000175643	RMI2	0.484613	0.881167	0.298913	0.748536	0.51243	0.892207
ENSG00000185513	L3MBTL1	0.774846	0.88112	0.243169	0.54659	0.217971	0.516339
ENSG00000167996	FTH1	0.361804	0.881049	0.348448	0.873162	0.137105	0.553466
ENSG00000179195	ZNF664	-0.380548	0.88089	-1.19436	0.988968	-0.517569	0.936043
ENSG00000008394	MGST1	0.372191	0.880756	-0.0777062	0.350106	0.102575	0.427109
ENSG00000174010	KLHL15	0.520511	0.880685	0.427419	0.8359	0.732274	0.93436
ENSG00000132718	SYT11	0.696634	0.880195	0.33089	0.680193	0.331242	0.684319
ENSG00000143147	GPR161	-0.550947	0.880179	-0.825117	0.927706	-0.0513657	0.19865
ENSG00000185222	TCEAL9	0.487956	0.880084	0.721146	0.940137	0.440416	0.856858
ENSG00000175040	CHST2	-0.703658	0.880029	0.965917	0.956069	0.343265	0.759481
ENSG00000169410	PTPN9	-0.423976	0.879871	-0.303637	0.791337	-0.368822	0.84977
ENSG00000129521	EGLN3	0.59729	0.879855	0.367581	0.755893	-0.0610536	0.199638
ENSG00000169760	NLGN1	-0.459547	0.8798	-0.859677	0.953279	-0.27669	0.749714
ENSG00000188153	COL4A5	0.41125	0.879776	-0.041726	0.179154	0.444946	0.894459
ENSG00000077152	UBE2T	-0.483575	0.87965	-0.237465	0.683046	0.201035	0.632161
ENSG00000066468	FGFR2	0.380669	0.879634	-0.275305	0.784912	-0.0857724	0.381495
ENSG00000119596	YLPM1	0.380481	0.879634	-0.105109	0.440165	-0.162351	0.58386
ENSG00000032444	PNPLA6	0.427613	0.879508	0.0236483	0.0979303	-0.338524	0.801745
ENSG00000187079	TEAD1	0.375477	0.879168	0.178181	0.627285	0.141387	0.536451
ENSG00000128309	MPST	0.455884	0.878931	0.325349	0.789029	0.494283	0.892563
ENSG00000133243	BTBD2	0.482283	0.878694	0.0155761	0.0811449	0.457518	0.868056
ENSG00000129116	PALLD	-0.543252	0.878591	-0.16311	0.510925	-0.258291	0.688507
ENSG00000178053	MLF1	0.565104	0.878472	0.246604	0.633386	0.82105	0.934882
ENSG00000134330	IAH1	-0.779408	0.878417	-0.943117	0.895985	-1.04241	0.906448
ENSG00000006015	REX1BD	0.700438	0.878409	0.10142	0.288267	0.484688	0.795012
ENSG00000102271	KLHL4	-0.57142	0.878401	0.0169716	0.082844	1.49444	0.986976
ENSG00000135272	MDFIC	-0.740325	0.878354	-0.33197	0.705411	-0.0474329	0.173148
ENSG00000087245	MMP2	-0.508009	0.878354	0.0843146	0.307613	-1.11239	0.955065
ENSG00000140022	STON2	-0.412317	0.878243	-0.550061	0.927153	-0.470848	0.903326
ENSG00000077063	CTTNBP2	-0.464442	0.878227	-1.41174	0.972767	-0.216296	0.661614
ENSG00000111328	CDK2AP1	-0.417827	0.878132	-0.0559452	0.254744	0.00669786	0.0558958
ENSG00000113721	PDGFRB	1.57266	0.878117	2.18864	0.935688	1.6525	0.888082
ENSG00000204977	TRIM13	-0.435544	0.877887	-0.340199	0.814634	-0.029353	0.139617
ENSG00000155189	AGPAT5	0.368234	0.877753	0.272329	0.786319	0.455109	0.921202
ENSG00000147601	TERF1	0.35276	0.877714	-0.693807	0.975897	-0.645962	0.971613
ENSG00000138376	BARD1	-0.407331	0.877571	-0.276278	0.771904	-0.267182	0.76182
ENSG00000131196	NFATC1	-1.02904	0.877461	-1.7495	0.912896	-1.91174	0.918397
ENSG00000273079	GRIN2B	1.85508	0.877413	1.45438	0.81446	2.13964	0.907467
ENSG00000183856	IQGAP3	-0.427335	0.87716	-0.582318	0.925406	-0.258619	0.737915
ENSG00000140450	ARRDC4	0.577568	0.877145	-0.884027	0.886731	0.133843	0.400667
ENSG00000136732	GYPC	-0.853364	0.876828	-0.304817	0.654992	-0.654415	0.841282
ENSG00000166750	SLFN5	-0.732784	0.876765	0.292337	0.692798	-0.00191691	0.0139246
ENSG00000224546	EIF4BP3	1.0236	0.876694	0.709908	0.795249	0.71987	0.801919
ENSG00000145808	ADAMTS19	-0.424862	0.876584	-0.565991	0.925738	-0.691694	0.947218
ENSG00000188897	AC099489.1	2.19329	0.876576	0.353592	0.381274	0.994823	0.648772
ENSG00000171608	PIK3CD	0.566953	0.876552	0.165322	0.484957	0.249775	0.636657
ENSG00000153094	BCL2L11	0.505557	0.876536	-0.62123	0.874189	-0.310445	0.716704
ENSG00000009413	REV3L	0.522395	0.876315	0.622733	0.906882	0.324143	0.747027
ENSG00000047230	CTPS2	0.391432	0.876315	0.0831377	0.335059	0.159832	0.575001
ENSG00000170430	MGMT	1.22011	0.876133	0.931209	0.815749	1.34143	0.893487
ENSG00000102580	DNAJC3	-0.404216	0.876078	0.283931	0.786011	-0.333235	0.827041
ENSG00000130313	PGLS	0.596896	0.875864	0.202715	0.53619	0.244524	0.608982
ENSG00000119669	IRF2BPL	-0.379205	0.875856	-0.556742	0.94133	-0.675542	0.960344
ENSG00000142552	RCN3	0.918476	0.875833	0.249602	0.511629	0.338591	0.616616
ENSG00000106236	NPTX2	0.628126	0.875825	-0.343768	0.676511	0.906403	0.931373
ENSG00000177463	NR2C2	0.40394	0.875738	0.0834116	0.328136	-0.0247173	0.104379
ENSG00000104518	GSDMD	0.704785	0.875564	0.730737	0.880401	1.08562	0.938256
ENSG00000064961	HMG20B	0.489787	0.875438	-0.379638	0.782668	0.205133	0.607149
ENSG00000162344	FGF19	-0.813561	0.875303	0.0237703	0.0800149	-2.06825	0.937379
ENSG00000048392	RRM2B	-0.368102	0.875185	-0.119179	0.481219	-0.0726736	0.319483
ENSG00000247134	AC090204.1	0.603989	0.874932	0.188016	0.51087	0.197246	0.533417
ENSG00000152128	TMEM163	-1.54537	0.874892	-2.06143	0.891172	-1.39308	0.866539
ENSG00000148842	CNNM2	0.504781	0.874742	-0.427886	0.804835	-0.0311559	0.119299
ENSG00000152818	UTRN	0.345542	0.874671	-0.376195	0.89152	-0.793684	0.981531
ENSG00000189229	AC069277.1	1.75146	0.874529	0.722553	0.63827	0.191305	0.301291
ENSG00000275464	FP565260.1	-0.57086	0.874284	-0.336132	0.753815	-0.390259	0.795865
ENSG00000125148	MT2A	-0.922263	0.873936	-0.912182	0.870807	-1.93824	0.924719
ENSG00000231752	EMBP1	0.971114	0.873873	-0.321511	0.540284	-0.512301	0.658327
ENSG00000146416	AIG1	0.508566	0.873833	-0.0948163	0.306593	0.132526	0.424636
ENSG00000124177	CHD6	0.363022	0.873731	-0.040672	0.19545	0.0768278	0.356752
ENSG00000137944	KYAT3	-0.453769	0.873683	-0.514484	0.894918	-0.26257	0.723334
ENSG00000158623	COPG2	0.408961	0.873565	-0.197454	0.626645	0.0218766	0.0997637
ENSG00000237975	FLG-AS1	2.45369	0.87343	0.0400164	0.0538727	-0.176968	0.174934
ENSG00000259203	AC016044.1	-1.22531	0.873359	-1.99221	0.90365	-1.16423	0.868428
ENSG00000147050	KDM6A	0.372083	0.873241	0.725943	0.971716	0.165217	0.608729
ENSG00000176624	MEX3C	0.366944	0.873091	0.525533	0.939402	0.394146	0.885205
ENSG00000003056	M6PR	0.378358	0.872877	0.140318	0.523293	-0.223622	0.69332
ENSG00000135074	ADAM19	-0.586458	0.87283	0.563316	0.898071	0.177129	0.546361
ENSG00000151893	CACUL1	0.36682	0.872806	0.206873	0.687851	0.284017	0.794388
ENSG00000134363	FST	-0.763399	0.872656	1.67378	0.982654	-0.891674	0.889757
ENSG00000164442	CITED2	0.518365	0.872498	0.169126	0.505354	0.443944	0.835616
ENSG00000118482	PHF3	0.351723	0.87245	0.213838	0.705158	0.267545	0.796916
ENSG00000111641	NOP2	0.40534	0.872237	0.288476	0.772963	0.166509	0.5767
ENSG00000173157	ADAMTS20	0.523887	0.872182	0.0917356	0.3031	0.144947	0.444005
ENSG00000152082	MZT2B	0.527748	0.872063	0.132835	0.409629	0.651488	0.909135
ENSG00000034677	RNF19A	-0.642957	0.871312	1.40595	0.980125	-0.657307	0.87494
ENSG00000169758	TMEM266	-1.3655	0.871241	-2.3173	0.901682	-1.30147	0.866966
ENSG00000198780	FAM169A	-0.35654	0.871107	-0.0460607	0.234987	-0.129308	0.518164
ENSG00000184363	PKP3	1.48895	0.871044	2.33496	0.946752	0.643764	0.658911
ENSG00000100744	GSKIP	-0.437855	0.870886	-0.179006	0.586317	-0.22719	0.681
ENSG00000184260	H2AC20	0.367258	0.870878	-0.175797	0.619287	0.587981	0.951367
ENSG00000106025	TSPAN12	-0.673418	0.870759	0.0373024	0.144058	-0.629486	0.861055
ENSG00000153044	CENPH	0.387367	0.870656	-0.166503	0.578154	0.194524	0.634666
ENSG00000259129	LINC00648	1.03098	0.870451	0.12803	0.289555	-1.71104	0.811054
ENSG00000143469	SYT14	0.400556	0.870277	0.0358644	0.173496	-0.209784	0.651744
ENSG00000003402	CFLAR	-0.690145	0.870159	-0.827689	0.890113	-1.16044	0.919819
ENSG00000157778	PSMG3	0.68099	0.870127	0.951403	0.921621	1.0471	0.934842
ENSG00000240184	PCDHGC3	-1.68543	0.870119	-0.75775	0.778946	-1.18999	0.840026
ENSG00000184384	MAML2	-0.605181	0.870032	-0.0774043	0.272999	-1.06537	0.927872
ENSG00000176595	KBTBD11	-0.620915	0.869779	-1.62588	0.945764	-0.978304	0.918808
ENSG00000204514	ZNF814	0.38453	0.869756	0.0665856	0.294463	0.174748	0.597831
ENSG00000064763	FAR2	-0.480559	0.869542	-0.621604	0.90851	-0.463916	0.861371
ENSG00000172139	SLC9C1	-1.19863	0.869511	-2.70392	0.914319	-2.20501	0.908479
ENSG00000184428	TOP1MT	0.491792	0.869297	0.130473	0.422376	0.141156	0.452849
ENSG00000110660	SLC35F2	-0.451325	0.869289	-0.167065	0.556255	-0.194058	0.605434
ENSG00000111206	FOXM1	0.367678	0.869266	0.0728518	0.304191	-0.0705148	0.307565
ENSG00000171943	SRGAP2C	-0.582732	0.869218	-1.11604	0.934084	-0.992112	0.927129
ENSG00000204644	ZFP57	2.09313	0.869084	2.38591	0.898379	-0.322554	0.327923
ENSG00000159140	SON	0.338225	0.869021	0.0396674	0.201661	0.0375418	0.205842
ENSG00000197256	KANK2	0.488981	0.869005	0.787657	0.94295	0.500148	0.873249
ENSG00000197956	S100A6	1.57423	0.868965	3.83707	0.986162	2.87266	0.965505
ENSG00000102218	RP2	-0.625752	0.86891	-0.508268	0.830511	-0.347182	0.740689
ENSG00000241945	PWP2	1.77241	0.868776	1.25927	0.777207	1.58433	0.841235
ENSG00000196712	NF1	0.35653	0.868554	-0.0468947	0.229329	-0.164438	0.587882
ENSG00000141664	ZCCHC2	-0.646817	0.868483	-0.41425	0.777673	-0.313262	0.700796
ENSG00000075336	TIMM21	-0.628703	0.868278	0.378272	0.792752	0.245107	0.653632
ENSG00000149531	FRG1BP	-1.25655	0.868222	-1.61261	0.885482	-1.66492	0.889346
ENSG00000111196	MAGOHB	0.409432	0.868143	-0.138029	0.485384	-0.0747955	0.28456
ENSG00000265972	TXNIP	0.393113	0.868104	-0.866419	0.959111	0.912218	0.977699
ENSG00000159166	LAD1	0.625025	0.868096	0.965494	0.933238	1.24479	0.958369
ENSG00000179271	GADD45GIP1	0.431144	0.867962	0.134329	0.455765	0.328935	0.795344
ENSG00000197563	PIGN	-0.484656	0.867946	0.352803	0.812777	0.33332	0.797209
ENSG00000149782	PLCB3	-0.366828	0.867914	-0.0869682	0.37869	0.551041	0.945969
ENSG00000183421	RIPK4	-0.754265	0.867883	-0.962066	0.892507	-1.52168	0.925707
ENSG00000206418	RAB12	-0.445856	0.867788	-0.739788	0.936936	-0.370342	0.823375
ENSG00000177200	CHD9	0.359239	0.867772	-0.0630638	0.26983	0.322373	0.835924
ENSG00000115652	UXS1	0.430437	0.867756	0.556927	0.916658	0.0935219	0.343199
ENSG00000112902	SEMA5A	-0.455896	0.867725	-1.72442	0.973107	-1.13105	0.961024
ENSG00000158089	GALNT14	1.25005	0.867717	1.23856	0.863512	1.43014	0.893479
ENSG00000134516	DOCK2	0.897721	0.867424	1.03205	0.890737	1.09616	0.902078
ENSG00000085982	USP40	0.558809	0.867408	0.38792	0.773611	0.367808	0.760185
ENSG00000157617	C2CD2	0.515157	0.867393	-0.346936	0.727902	0.00906273	0.0452825
ENSG00000163625	WDFY3	-0.350598	0.867013	-0.0995308	0.423126	-0.463049	0.923099
ENSG00000082397	EPB41L3	-0.516503	0.866982	-0.894366	0.93131	-0.684761	0.906622
ENSG00000065268	WDR18	0.463921	0.866887	0.366889	0.807656	0.507679	0.886912
ENSG00000270069	MIR222HG	0.742671	0.866839	0.23464	0.52519	0.199454	0.476802
ENSG00000184470	TXNRD2	1.53777	0.8668	2.33244	0.941109	1.90629	0.909656
ENSG00000243716	NPIPB5	0.567404	0.866674	0.366755	0.750543	-0.369419	0.717881
ENSG00000271860	AL589740.1	-1.87787	0.866579	-2.24834	0.875169	-0.405102	0.640964
ENSG00000234420	ZNF37BP	-0.445347	0.866547	-1.23501	0.965734	-0.933277	0.953256
ENSG00000106538	RARRES2	0.476776	0.866468	-0.563202	0.861616	0.718068	0.93436
ENSG00000186174	BCL9L	0.548657	0.86627	0.249253	0.626882	0.305022	0.704423
ENSG00000141429	GALNT1	-0.35387	0.866231	0.107779	0.455686	-0.210326	0.701254
ENSG00000272344	SNORD114-21	2.3406	0.865915	0.225131	0.247884	-0.283197	0.259967
ENSG00000205213	LGR4	-0.359849	0.865875	-0.57355	0.946048	-0.559719	0.943828
ENSG00000174442	ZWILCH	-0.358268	0.86586	-0.0898365	0.383368	0.285557	0.81122
ENSG00000163904	SENP2	0.402164	0.865844	0.271983	0.746821	0.30898	0.79355
ENSG00000159182	PRAC1	-1.81908	0.865781	-2.44762	0.880732	-2.69848	0.886802
ENSG00000133794	ARNTL	-0.95042	0.865757	-0.0573632	0.181612	-0.423214	0.725373
ENSG00000085276	MECOM	-1.35328	0.865741	-2.1341	0.893811	-2.61993	0.904251
ENSG00000013297	CLDN11	-0.699579	0.865686	-0.447815	0.781735	-0.648283	0.85448
ENSG00000128610	FEZF1	-1.38265	0.865599	-2.31259	0.895921	-1.3585	0.863876
ENSG00000162522	KIAA1522	0.484219	0.865559	0.645555	0.917923	0.245191	0.664649
ENSG00000137968	SLC44A5	0.985407	0.86548	0.0401118	0.104442	0.563645	0.734082
ENSG00000134775	FHOD3	0.862746	0.865393	-0.641531	0.720157	1.21586	0.920989
ENSG00000111652	COPS7A	0.482487	0.865298	0.0390264	0.151716	-0.170681	0.509914
ENSG00000132541	RIDA	0.450923	0.865069	0.207431	0.614743	0.633286	0.92592
ENSG00000177706	FAM20C	-0.648827	0.864911	-0.167672	0.48363	-0.806803	0.892152
ENSG00000173812	EIF1	0.362699	0.864777	0.417787	0.898885	0.00962323	0.0634745
ENSG00000133980	VRTN	0.348056	0.864722	0.485308	0.932037	0.432492	0.910478
ENSG00000157637	SLC38A10	-0.453512	0.864421	-0.617821	0.914627	-0.520659	0.89039
ENSG00000137288	UQCC2	0.446931	0.864342	0.28517	0.734469	0.738433	0.945187
ENSG00000187193	MT1X	-0.692749	0.864176	-0.0971072	0.311121	-0.81923	0.885205
ENSG00000267313	AC021504.1	0.786333	0.86416	-0.28525	0.548582	-0.457326	0.677546
ENSG00000198498	TMA16	0.403378	0.864153	0.328819	0.808209	0.295172	0.780099
ENSG00000005884	ITGA3	-0.553361	0.864145	0.626139	0.917464	0.293092	0.728447
ENSG00000173611	SCAI	0.396081	0.863963	-0.282969	0.743328	-0.129157	0.467753
ENSG00000162458	FBLIM1	-0.386271	0.863947	0.123214	0.464165	-0.0127839	0.0636642
ENSG00000172062	SMN1	-0.52125	0.86386	-0.908321	0.929705	-1.10524	0.943187
ENSG00000147526	TACC1	-0.471264	0.863489	-0.324285	0.766001	-0.829691	0.937284
ENSG00000182199	SHMT2	-0.347482	0.863473	0.404278	0.898798	-0.2124	0.698654
ENSG00000278771	RN7SL3	0.333543	0.863441	0.877765	0.988936	0.880523	0.988984
ENSG00000260822	NA	0.422157	0.863109	-0.392218	0.820387	-0.150401	0.501948
ENSG00000204531	POU5F1	-0.33075	0.86307	0.209374	0.71235	-0.396923	0.908107
ENSG00000129675	ARHGEF6	1.23351	0.862943	0.78786	0.754163	1.51629	0.901738
ENSG00000105738	SIPA1L3	0.451574	0.862849	0.0857805	0.317467	0.249635	0.683607
ENSG00000167526	RPL13	0.328626	0.862817	2.18372e-05	0.0107082	0.19806	0.694892
ENSG00000186260	MRTFB	0.409572	0.862754	-0.0105023	0.0543153	0.0198639	0.0941528
ENSG00000108306	FBXL20	0.711918	0.862754	0.144557	0.367231	0.218311	0.513849
ENSG00000089472	HEPH	0.375257	0.862453	-0.0488099	0.214701	-0.00716238	0.0551609
ENSG00000088882	CPXM1	-0.677322	0.862453	-0.217957	0.564956	-0.181551	0.50126
ENSG00000116478	HDAC1	0.359031	0.862414	0.50036	0.92822	0.346529	0.854148
ENSG00000184408	KCND2	0.510107	0.862367	-0.0471885	0.172145	0.222018	0.600463
ENSG00000162734	PEA15	-0.420337	0.862335	1.36773	0.991173	0.810099	0.96861
ENSG00000157764	BRAF	0.386503	0.862311	-0.195351	0.627704	0.0322755	0.140565
ENSG00000079739	PGM1	-0.459094	0.862208	1.14611	0.9818	-0.756505	0.932108
ENSG00000085449	WDFY1	0.353488	0.862153	0.429969	0.907807	0.309749	0.82795
ENSG00000130475	FCHO1	0.738448	0.862153	0.188426	0.450707	0.582174	0.809877
ENSG00000198799	LRIG2	0.373304	0.862114	-0.481252	0.902528	0.164572	0.574139
ENSG00000162878	PKDCC	0.617938	0.862074	1.49165	0.969954	3.1239	0.996254
ENSG00000089351	GRAMD1A	-0.378542	0.861971	-0.696481	0.953437	-0.665481	0.950039
ENSG00000145979	TBC1D7	-0.495415	0.861956	-0.633709	0.897834	-0.503295	0.862746
ENSG00000100350	FOXRED2	0.615834	0.861869	0.2493	0.589858	0.346097	0.708137
ENSG00000101868	POLA1	0.352783	0.861742	0.19574	0.671951	0.287926	0.807949
ENSG00000173614	NMNAT1	-1.14492	0.861679	-0.695104	0.794838	-1.09598	0.857056
ENSG00000105750	ZNF85	-0.412404	0.86145	-0.283011	0.753989	-0.469408	0.887711
ENSG00000123572	NRK	0.483389	0.861339	1.20071	0.973803	0.287159	0.713906
ENSG00000117500	TMED5	-0.393035	0.8613	-0.2131	0.664617	-0.530034	0.917717
ENSG00000197622	CDC42SE1	-0.368534	0.861268	0.180767	0.624155	0.266133	0.777499
ENSG00000185404	SP140L	1.91443	0.861205	0.353941	0.406618	0.327193	0.390876
ENSG00000113361	CDH6	-1.76534	0.86092	-0.816716	0.774212	-1.88072	0.865077
ENSG00000225648	SBDSP1	-0.893533	0.860889	-0.202893	0.496274	-0.583914	0.797556
ENSG00000226278	PSPHP1	2.3559	0.860794	2.46218	0.870546	2.54553	0.881618
ENSG00000198146	ZNF770	-0.327236	0.860644	-0.598298	0.964161	-1.01678	0.992358
ENSG00000149257	SERPINH1	-0.329204	0.860581	0.0695217	0.322328	-0.458138	0.93093
ENSG00000060749	QSER1	0.327674	0.860502	-0.379013	0.892855	0.00292567	0.0244035
ENSG00000128512	DOCK4	-0.38418	0.86043	-0.234523	0.703862	-0.64496	0.944523
ENSG00000160963	COL26A1	-0.378274	0.860193	-0.623173	0.941354	-0.835333	0.965513
ENSG00000127329	PTPRB	-1.43146	0.86017	-1.64952	0.868499	-1.49615	0.863299
ENSG00000171634	BPTF	0.333409	0.859996	-0.295387	0.830621	-0.171479	0.628328
ENSG00000162599	NFIA	-0.830814	0.859743	-2.48551	0.930954	-2.48237	0.932005
ENSG00000213225	NOC2LP1	1.74609	0.859427	1.43459	0.805119	1.37068	0.795929
ENSG00000009709	PAX7	-0.912742	0.859237	-3.24891	0.931002	-3.19728	0.9318
ENSG00000066135	KDM4A	0.359251	0.859213	0.206265	0.67836	0.0592419	0.267127
ENSG00000196418	ZNF124	-0.426599	0.858945	-0.20237	0.61954	0.00409215	0.0207367
ENSG00000185339	TCN2	-0.448399	0.858376	-0.357108	0.802551	0.312066	0.781435
ENSG00000186193	SAPCD2	-0.394443	0.858368	-1.05598	0.971313	-1.47733	0.980299
ENSG00000135821	GLUL	0.332309	0.858012	0.306376	0.839314	0.697109	0.975699
ENSG00000142627	EPHA2	-0.539607	0.857562	1.61684	0.98734	0.213181	0.606928
ENSG00000170234	PWWP2A	0.358554	0.857514	-0.491186	0.909696	-0.225249	0.705316
ENSG00000111266	DUSP16	0.360431	0.857514	-1.16411	0.978323	0.36019	0.856661
ENSG00000178163	ZNF518B	-0.45411	0.857364	-0.714514	0.924332	-0.363383	0.804005
ENSG00000160194	NDUFV3	0.438948	0.857356	0.389853	0.825042	0.570076	0.908921
ENSG00000140931	CMTM3	-0.579579	0.857151	0.06916	0.243569	-0.403579	0.781316
ENSG00000228592	AP000459.3	-0.701691	0.857001	-0.51778	0.802994	-0.196791	0.524068
ENSG00000143401	ANP32E	-0.327308	0.856969	-0.500244	0.940414	0.224817	0.72659
ENSG00000171316	CHD7	-0.328709	0.856716	-1.01751	0.990556	-0.183953	0.649025
ENSG00000243317	STMP1	0.428259	0.856574	0.149222	0.491619	0.265929	0.715029
ENSG00000100099	HPS4	0.40302	0.856574	-0.176101	0.567335	0.0920757	0.347363
ENSG00000178104	PDE4DIP	-0.422109	0.856558	-0.767129	0.941678	0.112379	0.417832
ENSG00000189067	LITAF	0.46949	0.856511	2.14234	0.993607	0.782519	0.94073
ENSG00000065534	MYLK	-0.402979	0.856471	-1.08133	0.968018	-0.641232	0.932519
ENSG00000184634	MED12	0.412758	0.856408	-0.21499	0.620923	0.233541	0.672488
ENSG00000169071	ROR2	-0.566808	0.856321	-0.388765	0.772916	-2.00596	0.953477
ENSG00000091129	NRCAM	1.07556	0.856242	0.442718	0.625689	1.06147	0.853199
ENSG00000170703	TTLL6	1.4825	0.856116	-0.00974432	0.026561	1.07101	0.775263
ENSG00000077279	DCX	1.24658	0.856036	0.647079	0.689408	1.26315	0.858763
ENSG00000079999	KEAP1	0.400684	0.856036	0.430619	0.871391	0.46421	0.88707
ENSG00000102078	SLC25A14	-0.80129	0.855886	-0.0946946	0.273876	-0.720952	0.84129
ENSG00000125285	SOX21	-0.854506	0.855871	-2.68307	0.928868	-2.20727	0.923375
ENSG00000106571	GLI3	-0.569624	0.855728	-1.29167	0.935506	-0.564968	0.853128
ENSG00000188158	NHS	0.708597	0.855689	1.2292	0.938754	1.09133	0.925683
ENSG00000078269	SYNJ2	-0.476585	0.855554	0.0625238	0.231288	-0.389386	0.809252
ENSG00000147872	PLIN2	-0.421129	0.855515	0.190235	0.611076	-0.351215	0.809663
ENSG00000183117	CSMD1	1.32131	0.855444	3.26713	0.981192	-0.195869	0.332641
ENSG00000251562	MALAT1	0.322382	0.855262	-0.235183	0.762548	-0.585857	0.964517
ENSG00000066735	KIF26A	0.366746	0.855254	0.300616	0.794032	0.334371	0.824592
ENSG00000023191	RNH1	-0.509585	0.855207	-0.507559	0.852733	-0.281497	0.699255
ENSG00000104731	KLHDC4	0.483092	0.85493	0.296785	0.713409	0.277297	0.693067
ENSG00000134323	MYCN	0.351045	0.854677	0.0751554	0.336971	0.675645	0.963908
ENSG00000152661	GJA1	-0.318952	0.854448	1.36676	0.997408	-0.0308031	0.161966
ENSG00000274588	DGKK	1.17017	0.854432	0.781199	0.755048	2.19209	0.954947
ENSG00000138606	SHF	-0.642381	0.854409	-0.441971	0.77927	-0.252712	0.616474
ENSG00000011258	MBTD1	0.339841	0.854409	-0.382441	0.874529	-0.0676869	0.31335
ENSG00000189046	ALKBH2	0.864341	0.854235	1.01468	0.882605	1.26241	0.918333
ENSG00000054282	SDCCAG8	0.596877	0.854211	-0.112239	0.312331	-0.321524	0.645508
ENSG00000056998	GYG2	0.385763	0.854069	0.571656	0.928117	0.516014	0.91371
ENSG00000074071	MRPS34	0.355622	0.85395	0.17222	0.591573	0.248427	0.740791
ENSG00000156253	RWDD2B	1.13219	0.853832	1.54573	0.909814	1.8897	0.940453
ENSG00000152601	MBNL1	-0.466327	0.853745	-0.228469	0.642758	-0.376404	0.804843
ENSG00000111642	CHD4	0.319104	0.85365	-0.0874428	0.396597	0.128278	0.528714
ENSG00000148219	ASTN2	0.610118	0.853571	0.219452	0.536222	0.0685999	0.211713
ENSG00000145882	PCYOX1L	0.811557	0.853547	0.3082	0.584421	0.897593	0.872498
ENSG00000177614	PGBD5	-0.467451	0.853421	-1.45039	0.959775	-0.332785	0.766981
ENSG00000128268	MGAT3	-0.589481	0.853373	-0.567088	0.844775	-0.140205	0.427916
ENSG00000173258	ZNF483	-0.342371	0.853334	0.357392	0.871565	-0.258794	0.772647
ENSG00000137312	FLOT1	-0.40912	0.853207	-0.127015	0.463043	-0.250763	0.708691
ENSG00000236901	MIR600HG	0.40198	0.853176	-0.450206	0.854772	0.0560579	0.2372
ENSG00000031081	ARHGAP31	-0.613136	0.853057	-1.52966	0.934913	-0.891495	0.89962
ENSG00000177570	SAMD12	0.585163	0.852954	-0.109714	0.312331	0.175376	0.474755
ENSG00000135333	EPHA7	-0.535985	0.852749	-1.21573	0.936739	-1.00942	0.926189
ENSG00000116106	EPHA4	-1.13446	0.85263	0.319799	0.642197	-0.161043	0.397719
ENSG00000143228	NUF2	-0.4503	0.852599	-0.626423	0.90644	-0.190444	0.585203
ENSG00000215158	AC138409.2	0.554686	0.852283	0.103696	0.306783	-0.412232	0.735323
ENSG00000156687	UNC5D	0.338975	0.852148	-0.0770191	0.341855	0.774148	0.976324
ENSG00000183850	ZNF730	-0.39219	0.852046	-0.8105	0.954062	-1.11503	0.970562
ENSG00000133961	NUMB	0.417761	0.852022	0.254126	0.6894	0.164621	0.525609
ENSG00000088888	MAVS	0.366406	0.852022	0.144647	0.50861	-0.0602367	0.254396
ENSG00000174501	ANKRD36C	0.444775	0.852006	-0.314009	0.723484	-0.253471	0.656493
ENSG00000180336	MEIOC	1.40085	0.851927	-0.218786	0.339595	1.69846	0.892855
ENSG00000133169	BEX1	0.487117	0.85169	0.79728	0.933388	1.08339	0.963071
ENSG00000276903	H2AC16	0.340345	0.85165	0.274798	0.781087	0.0351357	0.191972
ENSG00000089682	RBM41	0.405379	0.851445	0.16191	0.525427	0.216793	0.648219
ENSG00000124532	MRS2	0.352923	0.851097	1.44413	0.994792	0.165985	0.598843
ENSG00000066923	STAG3	1.28136	0.851026	0.161502	0.29692	-0.114485	0.214629
ENSG00000141576	RNF157	0.694113	0.851018	-1.07303	0.834367	0.27907	0.590743
ENSG00000166532	RIMKLB	0.334703	0.850726	0.00837309	0.0637511	-0.290642	0.808699
ENSG00000143971	ETAA1	0.383442	0.850592	0.19675	0.629585	0.261357	0.733331
ENSG00000198153	ZNF849P	-2.29224	0.850497	-2.29224	0.847881	-2.29224	0.850212
ENSG00000151322	NPAS3	-1.31655	0.850402	-2.24675	0.8856	-2.42917	0.891132
ENSG00000198162	MAN1A2	-0.359544	0.850275	-0.334785	0.826172	-0.345693	0.841891
ENSG00000085491	SLC25A24	-0.366474	0.850133	0.27441	0.767582	-0.309939	0.801848
ENSG00000172954	LCLAT1	0.452934	0.850023	0.269714	0.690372	0.314693	0.743692
ENSG00000236333	TRHDE-AS1	-1.2957	0.849896	-1.55545	0.862738	-1.60388	0.867084
ENSG00000140455	USP3	-0.486641	0.84988	-1.69777	0.958542	0.264031	0.698883
ENSG00000237296	SMG1P1	0.376291	0.849825	0.23527	0.699271	-0.0880479	0.34843
ENSG00000168813	ZNF507	0.366953	0.849667	0.131212	0.476572	0.0943052	0.362623
ENSG00000090530	P3H2	0.837585	0.849588	0.915736	0.864587	1.74686	0.95678
ENSG00000141994	DUS3L	0.682288	0.849446	0.739838	0.863212	0.588719	0.816302
ENSG00000144802	NFKBIZ	0.71361	0.849303	0.348751	0.651744	0.327434	0.635519
ENSG00000252010	SCARNA5	-0.35188	0.849256	-0.106401	0.438481	-0.0897203	0.380934
ENSG00000139211	AMIGO2	-1.22173	0.84909	-0.200545	0.450264	-0.356233	0.628407
ENSG00000145681	HAPLN1	-1.43169	0.849074	1.18288	0.925406	-1.98609	0.872672
ENSG00000159712	ANKRD18CP	0.329145	0.849027	-0.589123	0.94966	-0.611216	0.953105
ENSG00000177181	RIMKLA	1.08009	0.8489	0.673968	0.731063	1.04572	0.841488
ENSG00000247498	GPRC5D-AS1	2.1833	0.848853	0.984231	0.600558	1.51343	0.735734
ENSG00000203667	COX20	0.473789	0.848798	0.390751	0.797169	-0.0345373	0.118343
ENSG00000158321	AUTS2	0.41391	0.848608	0.481242	0.881815	0.300241	0.755467
ENSG00000102225	CDK16	0.35549	0.848505	-0.0236027	0.101803	0.20634	0.668403
ENSG00000106333	PCOLCE	0.635364	0.848418	0.784268	0.885798	0.755821	0.881902
ENSG00000182022	CHST15	-0.651736	0.848363	-0.0735644	0.229969	-0.167818	0.471744
ENSG00000185437	SH3BGR	1.36565	0.848126	1.39624	0.850386	0.0330522	0.0671256
ENSG00000170776	AKAP13	0.331962	0.848055	0.237045	0.743676	0.168165	0.61521
ENSG00000123119	NECAB1	0.961233	0.847992	2.00824	0.9584	-0.253774	0.450541
ENSG00000197321	SVIL	-0.390399	0.847952	0.273564	0.753207	0.453388	0.895463
ENSG00000169856	ONECUT1	-0.979528	0.847794	-2.58898	0.911996	-1.47169	0.88451
ENSG00000183696	UPP1	-0.514099	0.847596	0.762402	0.940896	0.0724369	0.25728
ENSG00000198417	MT1F	-1.0721	0.847557	-1.52307	0.876362	-2.54926	0.906021
ENSG00000091073	DTX2	-0.662914	0.847541	-0.255917	0.608492	-0.547444	0.815021
ENSG00000110237	ARHGEF17	0.703233	0.847415	-0.0735158	0.192992	-0.215235	0.475324
ENSG00000086598	TMED2	-0.321726	0.847399	0.077476	0.357123	0.123692	0.496266
ENSG00000101310	SEC23B	-0.353587	0.847217	-0.205094	0.6767	-0.174363	0.602052
ENSG00000148942	SLC5A12	1.25709	0.847201	-0.229519	0.367183	0.177635	0.324611
ENSG00000165731	RET	-0.91687	0.84713	-0.87904	0.839346	-1.79433	0.902006
ENSG00000151224	MAT1A	1.65535	0.847083	0.758863	0.629276	1.28806	0.780076
ENSG00000184254	ALDH1A3	-0.754553	0.846925	0.278849	0.641992	-1.02667	0.882005
ENSG00000219481	NBPF1	-0.435857	0.846814	-0.610243	0.902054	-0.714573	0.9217
ENSG00000128609	NDUFA5	-0.346094	0.846798	-0.350115	0.845826	-0.121585	0.473893
ENSG00000185950	IRS2	0.45943	0.846759	-0.16972	0.493405	0.114894	0.368843
ENSG00000111711	GOLT1B	0.356131	0.846751	-0.015999	0.0945479	0.037888	0.180703
ENSG00000180747	SMG1P3	0.444716	0.846751	0.239496	0.64833	-0.275769	0.683979
ENSG00000096746	HNRNPH3	0.330928	0.846735	-0.0281553	0.148784	0.118801	0.483582
ENSG00000113296	THBS4	0.769993	0.846672	-0.180975	0.395499	0.0935352	0.236188
ENSG00000197705	KLHL14	-1.21904	0.846632	-1.92552	0.8798	-0.909031	0.812508
ENSG00000171848	RRM2	-0.318926	0.846577	-0.0540305	0.239792	-0.290227	0.818609
ENSG00000242715	CCDC169	0.440019	0.846498	1.29923	0.979287	-0.548793	0.858565
ENSG00000173673	HES3	-0.645405	0.846443	-2.9727	0.946799	-2.55337	0.944333
ENSG00000136051	WASHC4	-0.325854	0.846435	0.113849	0.453157	-0.488663	0.928322
ENSG00000141759	TXNL4A	-0.376757	0.846206	0.280292	0.769534	0.364246	0.846877
ENSG00000122861	PLAU	-0.57346	0.846198	0.639779	0.904772	1.06627	0.963276
ENSG00000129474	AJUBA	0.397265	0.846087	0.362055	0.816191	0.365703	0.824244
ENSG00000112473	SLC39A7	-0.335631	0.845945	-0.189734	0.646923	-0.089161	0.385028
ENSG00000089486	CDIP1	0.438399	0.845945	0.779095	0.942524	0.523797	0.883151
ENSG00000213420	GPC2	0.531217	0.845882	-0.387487	0.720173	-0.0459255	0.161207
ENSG00000166619	BLCAP	-0.39665	0.845708	-0.282584	0.743328	0.0280499	0.134385
ENSG00000123545	NDUFAF4	-0.441536	0.845455	0.0988773	0.362544	0.103451	0.37115
ENSG00000198113	TOR4A	1.32755	0.845415	1.98752	0.922878	2.1048	0.933277
ENSG00000160201	U2AF1	-0.816181	0.845399	-0.822391	0.843495	-1.34543	0.893993
ENSG00000010278	CD9	-0.330893	0.845147	-0.0744427	0.313208	-0.740277	0.969646
ENSG00000091317	CMTM6	-0.331035	0.845091	-0.0948655	0.385636	-0.313407	0.827571
ENSG00000198840	MT-ND3	-0.325977	0.844957	-0.80619	0.97513	-0.738944	0.969685
ENSG00000082805	ERC1	0.34444	0.844878	-0.11155	0.433977	-0.265207	0.764041
ENSG00000076067	RBMS2	0.627529	0.844744	1.76144	0.97415	0.349956	0.683726
ENSG00000164976	MYORG	-0.858837	0.844506	0.297149	0.644386	-0.709044	0.817953
ENSG00000151276	MAGI1	0.332491	0.844404	0.401891	0.891559	0.316808	0.834747
ENSG00000144395	CCDC150	-0.365118	0.844325	-0.545131	0.919456	-0.839449	0.960558
ENSG00000147251	DOCK11	0.400755	0.844317	-1.37265	0.958076	-0.63935	0.904006
ENSG00000069702	TGFBR3	-0.628415	0.84419	-0.493836	0.795367	-0.687042	0.856993
ENSG00000143951	WDPCP	0.553919	0.844088	-0.440338	0.737251	0.348571	0.716427
ENSG00000133639	BTG1	0.415351	0.844024	0.0168121	0.0823936	0.204049	0.598772
ENSG00000089094	KDM2B	0.32131	0.844016	-0.0486958	0.235121	-0.0616418	0.281415
ENSG00000123983	ACSL3	-0.315503	0.84389	-0.0335882	0.155438	-0.0636325	0.284284
ENSG00000105143	SLC1A6	0.746124	0.843858	0.00183714	0.0107082	0.456658	0.720363
ENSG00000196663	TECPR2	-0.424051	0.843692	-0.373754	0.810193	-0.76932	0.932859
ENSG00000248874	C5orf17	2.20481	0.843637	1.33823	0.683117	1.85374	0.789804
ENSG00000100311	PDGFB	0.86831	0.84359	-0.12603	0.286102	0.900381	0.850592
ENSG00000149269	PAK1	-0.328366	0.843289	0.546212	0.948016	-0.231358	0.727286
ENSG00000087510	TFAP2C	-0.676968	0.843289	0.994156	0.945021	-2.02249	0.931657
ENSG00000145687	SSBP2	0.418467	0.843171	-0.963978	0.930535	-0.22715	0.629063
ENSG00000163378	EOGT	-0.420805	0.843021	1.17708	0.982709	-0.302292	0.751602
ENSG00000095637	SORBS1	-0.374941	0.842981	-0.241596	0.706486	-0.828398	0.958076
ENSG00000197111	PCBP2	0.329004	0.842958	0.00199805	0.0200966	-0.307604	0.817092
ENSG00000265579	AC023301.1	-1.13274	0.842934	-1.33231	0.856108	-1.08988	0.838603
ENSG00000131724	IL13RA1	-0.724164	0.842894	0.00773736	0.0392132	-0.48956	0.772189
ENSG00000166886	NAB2	0.55925	0.842697	-0.138722	0.378634	0.183473	0.480761
ENSG00000197530	MIB2	0.661488	0.842475	0.14588	0.376058	0.304817	0.619682
ENSG00000177873	ZNF619	0.889676	0.842428	0.458526	0.669604	1.18821	0.896996
ENSG00000044446	PHKA2	0.426015	0.842349	0.0485977	0.18554	0.236916	0.654929
ENSG00000147416	ATP6V1B2	0.34728	0.842349	-0.00736398	0.0547183	0.203386	0.653467
ENSG00000204179	PTPN20	2.16491	0.842294	0.657017	0.488553	1.10704	0.634429
ENSG00000237978	KCNMB2-AS1	1.12676	0.84227	-0.582125	0.59211	0.241889	0.422463
ENSG00000154429	CCSAP	-0.472177	0.842262	-0.127198	0.424438	-1.07273	0.939884
ENSG00000171298	GAA	0.483235	0.842167	-0.228325	0.579639	0.231225	0.607386
ENSG00000117592	PRDX6	-0.314509	0.842159	-0.000286768	0.0173622	0.19705	0.692008
ENSG00000081803	CADPS2	0.370696	0.842136	-0.487559	0.882542	0.0263112	0.131027
ENSG00000184697	CLDN6	-0.313686	0.842136	-0.0810297	0.359194	-0.270835	0.799611
ENSG00000167114	SLC27A4	-0.525201	0.84193	-0.31735	0.71299	-0.507845	0.834731
ENSG00000091409	ITGA6	0.307655	0.841835	-0.0931678	0.393847	0.49077	0.939742
ENSG00000183723	CMTM4	0.340549	0.841748	-0.0706756	0.296581	-0.09699	0.403164
ENSG00000065675	PRKCQ	-0.540728	0.841725	-0.551412	0.842523	-0.489291	0.822197
ENSG00000184702	SEPTIN5	-0.843666	0.841725	-1.23138	0.878986	-1.34965	0.888082
ENSG00000165115	KIF27	0.701489	0.841654	0.448335	0.724757	0.544622	0.78006
ENSG00000196562	SULF2	-0.475807	0.841575	1.03192	0.969575	-0.128319	0.426517
ENSG00000177239	MAN1B1	-0.393946	0.841559	-0.47196	0.879199	-0.42938	0.862872
ENSG00000133985	TTC9	-0.425309	0.841496	-1.26288	0.95806	-0.360926	0.797778
ENSG00000253816	AC138866.1	-1.18484	0.841448	-1.38171	0.853326	-1.2573	0.847367
ENSG00000169515	CCDC8	-0.426521	0.841409	-0.35418	0.788168	-1.2056	0.956567
ENSG00000110218	PANX1	0.389361	0.841385	0.25867	0.71137	0.520329	0.90399
ENSG00000104856	RELB	1.23282	0.841361	0.720232	0.702116	0.842452	0.747485
ENSG00000135119	RNFT2	0.43501	0.841274	-0.245611	0.637132	-0.400953	0.786698
ENSG00000185008	ROBO2	-0.728914	0.841251	-1.02095	0.878401	-0.696482	0.834257
ENSG00000138709	LARP1B	0.356835	0.841195	0.229732	0.691921	-0.343922	0.810794
ENSG00000143248	RGS5	0.53672	0.841187	1.54275	0.974514	0.841885	0.920657
ENSG00000090776	EFNB1	-0.630562	0.841156	-1.17722	0.907752	-0.259816	0.616474
ENSG00000139364	TMEM132B	-0.313738	0.841085	-1.8056	0.997724	-0.220739	0.725745
ENSG00000126822	PLEKHG3	0.358192	0.840919	0.176459	0.595137	0.216244	0.676195
ENSG00000102780	DGKH	-0.382686	0.840697	-1.11611	0.967583	-0.626565	0.928141
ENSG00000073614	KDM5A	0.324861	0.840626	-0.0915276	0.383471	-0.0793205	0.353978
ENSG00000138459	SLC35A5	-0.366098	0.840531	-0.359762	0.83172	-0.500861	0.902615
ENSG00000171792	RHNO1	0.366154	0.840365	-0.135281	0.482752	0.0214975	0.0971716
ENSG00000114439	BBX	-0.324844	0.840239	-0.688588	0.966706	-0.673628	0.964675
ENSG00000106665	CLIP2	0.360064	0.840168	-0.618739	0.923952	0.0871137	0.355788
ENSG00000100554	ATP6V1D	-0.36743	0.840168	-0.417807	0.868254	-0.0788902	0.327448
ENSG00000244879	GABPB1-AS1	0.383188	0.840034	-0.495521	0.874047	-0.0627097	0.240645
ENSG00000123144	TRIR	0.352309	0.84001	-0.0437895	0.180332	0.0617317	0.25879
ENSG00000136938	ANP32B	0.427727	0.839931	0.453748	0.849706	-0.0305421	0.118841
ENSG00000214717	ZBED1	0.349537	0.839899	-0.250745	0.719509	-0.00967458	0.0584642
ENSG00000253305	PCDHGB6	-1.19522	0.839749	-1.021	0.819273	-1.13277	0.83398
ENSG00000134504	KCTD1	-0.80619	0.839575	-1.28546	0.885419	-0.541862	0.772576
ENSG00000101751	POLI	0.379303	0.839567	-0.219579	0.640356	0.0499435	0.205984
ENSG00000136944	LMX1B	-1.15583	0.839465	-2.32785	0.888856	-2.53625	0.89427
ENSG00000152492	CCDC50	-0.384918	0.839362	-0.371186	0.829452	-0.18038	0.591375
ENSG00000188994	ZNF292	0.320906	0.839235	0.00740151	0.0618544	0.187738	0.657402
ENSG00000228314	CYP4F29P	-2.16027	0.839093	-2.16027	0.836177	-2.14959	0.838651
ENSG00000188002	AC026412.1	1.52012	0.839038	1.43501	0.821612	1.48416	0.832913
ENSG00000156531	PHF6	0.3241	0.838935	-0.134535	0.50669	0.261474	0.773817
ENSG00000171055	FEZ2	0.416205	0.838864	0.220113	0.622828	-0.0226189	0.0885024
ENSG00000196367	TRRAP	0.318351	0.838722	0.083063	0.348422	-0.0741188	0.3164
ENSG00000163428	LRRC58	0.34619	0.838706	0.303326	0.793044	0.560461	0.934518
ENSG00000182903	ZNF721	0.31782	0.838666	0.257208	0.772102	0.0322611	0.154071
ENSG00000254339	AC064802.1	0.321491	0.838666	1.33667	0.995598	-0.656936	0.958471
ENSG00000230409	TCEA1P2	0.758722	0.838619	0.097197	0.247521	-0.825213	0.765234
ENSG00000270647	TAF15	0.337892	0.838564	-0.0928552	0.364939	-0.0448527	0.188535
ENSG00000158773	USF1	-0.384888	0.83854	-0.341538	0.806447	0.313632	0.796845
ENSG00000226792	C13orf42	-0.55645	0.838532	-1.31211	0.927335	-0.531665	0.828867
ENSG00000171044	XKR6	0.633455	0.838445	-0.0277587	0.0892847	-0.0851446	0.242929
ENSG00000143499	SMYD2	-0.950638	0.838342	1.07631	0.930606	-0.851782	0.824631
ENSG00000235152	AL353052.1	-0.985522	0.838334	-1.35125	0.867195	-0.947267	0.833577
ENSG00000088367	EPB41L1	0.552016	0.838263	0.172096	0.453623	0.403283	0.754147
ENSG00000113209	PCDHB5	-0.404612	0.83824	-1.57191	0.970523	-3.53536	0.98097
ENSG00000124766	SOX4	0.313583	0.838168	0.537978	0.950561	0.217133	0.722173
ENSG00000196653	ZNF502	-0.673164	0.838121	-0.825487	0.863394	-1.02685	0.888556
ENSG00000184897	H1-10	0.359672	0.838097	-0.462038	0.87592	-0.12112	0.443602
ENSG00000090861	AARS1	0.308644	0.83801	0.536671	0.950561	0.194956	0.667423
ENSG00000134375	TIMM17A	-0.363474	0.837931	0.0738504	0.294225	0.412347	0.882171
ENSG00000090520	DNAJB11	-0.373038	0.837916	0.120114	0.450185	-0.298878	0.778226
ENSG00000107562	CXCL12	-0.379485	0.837916	-0.239964	0.693778	-1.00723	0.962494
ENSG00000165704	HPRT1	0.527425	0.837884	0.570732	0.852551	0.486865	0.818238
ENSG00000101265	RASSF2	-0.458357	0.837852	-0.652346	0.89457	-0.397907	0.805846
ENSG00000062822	POLD1	0.347008	0.837837	-0.0267852	0.134954	0.361599	0.845478
ENSG00000121390	PSPC1	0.319094	0.837813	-0.260073	0.76578	0.0440184	0.198002
ENSG00000144118	RALB	-0.562619	0.837734	-0.21237	0.556959	-0.163173	0.468464
ENSG00000074800	ENO1	0.303614	0.837339	0.695758	0.977667	0.585377	0.964485
ENSG00000071282	LMCD1	1.1949	0.837181	1.93212	0.927548	1.62759	0.900307
ENSG00000184500	PROS1	-0.661113	0.837133	-2.33775	0.934297	-1.68231	0.922309
ENSG00000072042	RDH11	-0.322454	0.837133	0.042049	0.195703	-0.0535628	0.240179
ENSG00000081913	PHLPP1	-0.349141	0.83711	0.149806	0.544757	0.266675	0.768838
ENSG00000150687	PRSS23	-0.870973	0.836975	0.561017	0.823288	0.320005	0.661883
ENSG00000154822	PLCL2	0.72354	0.836928	-0.763267	0.760382	0.00123002	0.0108346
ENSG00000169715	MT1E	-1.00032	0.836865	-0.776278	0.800054	-2.15847	0.896783
ENSG00000131844	MCCC2	0.343034	0.836841	0.00361898	0.0208947	0.18762	0.633852
ENSG00000167074	TEF	0.919259	0.836809	-0.134923	0.27993	0.453471	0.653925
ENSG00000169756	LIMS1	-0.363795	0.836738	0.0248341	0.103083	-0.246766	0.724046
ENSG00000059804	SLC2A3	0.29504	0.83673	0.848999	0.987545	-0.133218	0.529631
ENSG00000188976	NOC2L	-0.321317	0.836517	-0.0856915	0.3834	-0.150996	0.567936
ENSG00000156304	SCAF4	0.401881	0.836327	0.0318131	0.12412	0.126848	0.439762
ENSG00000187535	IFT140	0.510765	0.836209	-0.40384	0.728621	0.0930603	0.285754
ENSG00000005889	ZFX	0.371906	0.836027	0.502629	0.902449	0.395852	0.854891
ENSG00000158301	GPRASP2	-0.46247	0.835924	-0.00976818	0.0490126	-0.566501	0.874134
ENSG00000142173	COL6A2	-0.347978	0.835892	-0.190432	0.628036	-0.336521	0.827342
ENSG00000150093	ITGB1	-0.296389	0.835869	0.271989	0.802338	0.0316998	0.161745
ENSG00000188643	S100A16	1.3007	0.835861	1.69133	0.890935	2.97091	0.971637
ENSG00000102317	RBM3	-0.312565	0.83579	-0.344045	0.859869	-0.552923	0.949115
ENSG00000118193	KIF14	-0.331903	0.835466	-0.217024	0.698907	0.11306	0.449822
ENSG00000205571	SMN2	1.62802	0.83545	1.5518	0.819676	1.59509	0.829697
ENSG00000166869	CHP2	1.99671	0.835094	0.836106	0.571294	1.6289	0.773801
ENSG00000146477	SLC22A3	-1.22324	0.835031	0.496914	0.750267	-1.4006	0.847913
ENSG00000160867	FGFR4	0.397227	0.834968	0.595425	0.916547	0.54318	0.901027
ENSG00000103222	ABCC1	0.330912	0.834715	-0.0581547	0.259311	-0.0821091	0.340227
ENSG00000165476	REEP3	0.364315	0.834707	0.112915	0.410142	-0.0166048	0.0918373
ENSG00000139651	ZNF740	0.402305	0.834636	-0.238093	0.644639	0.352917	0.796458
ENSG00000171806	METTL18	1.00403	0.834612	0.993952	0.829626	1.3607	0.895179
ENSG00000116406	EDEM3	-0.40883	0.834415	-0.0274701	0.125021	0.525584	0.908755
ENSG00000067992	PDK3	0.465894	0.834415	-0.124423	0.366812	0.0629792	0.208758
ENSG00000165959	CLMN	0.783298	0.834351	-0.591512	0.689171	0.0783554	0.201637
ENSG00000093010	COMT	0.903489	0.834344	1.30108	0.902165	0.945962	0.844222
ENSG00000184058	TBX1	-1.54092	0.834186	-1.99827	0.851564	-2.33744	0.863465
ENSG00000165819	METTL3	0.32539	0.834114	-0.0100289	0.0604952	-0.0218091	0.105825
ENSG00000157150	TIMP4	-0.957089	0.834099	1.19385	0.939884	-0.547108	0.745201
ENSG00000145348	TBCK	0.373892	0.834075	0.0305336	0.129802	0.16598	0.558231
ENSG00000225470	JPX	0.443331	0.834059	0.201239	0.565865	0.0192085	0.0806313
ENSG00000186480	INSIG1	-0.356815	0.833917	0.200186	0.646757	-0.0786431	0.328231
ENSG00000111678	C12orf57	0.411651	0.833861	0.0256364	0.114534	0.222168	0.62749
ENSG00000176244	ACBD7	1.15372	0.833672	0.37946	0.534879	0.774263	0.734185
ENSG00000173588	CEP83	0.384348	0.833664	0.236409	0.677846	0.0825024	0.306633
ENSG00000087095	NLK	0.33651	0.833617	0.0229043	0.101803	0.163184	0.568173
ENSG00000076604	TRAF4	-0.330602	0.833348	0.197267	0.666609	-0.197906	0.664119
ENSG00000177469	CAVIN1	0.365335	0.833134	0.584156	0.926189	0.373892	0.834336
ENSG00000061273	HDAC7	-0.366429	0.832961	0.113605	0.41893	0.0120702	0.0600368
ENSG00000112658	SRF	0.383717	0.832755	0.510195	0.897138	0.276074	0.735828
ENSG00000158863	FAM160B2	-0.661398	0.832708	-1.25658	0.900766	-1.15716	0.896158
ENSG00000100393	EP300	0.310086	0.832676	-0.0159514	0.106908	-0.201313	0.676764
ENSG00000152520	PAN3	0.331818	0.832668	-0.166547	0.585614	-0.066116	0.298627
ENSG00000207927	MIR302A	0.870209	0.832534	0.304035	0.53574	0.357704	0.591802
ENSG00000113448	PDE4D	-0.818443	0.832249	1.12621	0.941417	-0.852	0.836785
ENSG00000138443	ABI2	0.313634	0.832155	-0.25751	0.769502	0.145421	0.568678
ENSG00000283674	AC068587.4	-0.625883	0.831973	0.0315819	0.106789	-1.18466	0.903666
ENSG00000162909	CAPN2	-0.428532	0.831917	0.475228	0.879776	0.725848	0.94559
ENSG00000166681	BEX3	0.308674	0.831751	0.492547	0.932187	0.463228	0.922285
ENSG00000143013	LMO4	-0.350109	0.831744	-0.0835229	0.328863	-0.595629	0.931997
ENSG00000143337	TOR1AIP1	-0.394145	0.831712	-0.2031	0.612934	0.225192	0.678826
ENSG00000167785	ZNF558	1.15849	0.831704	0.848004	0.750796	1.29158	0.855626
ENSG00000181061	HIGD1A	-0.357228	0.831688	0.149909	0.533828	-0.19073	0.619809
ENSG00000178184	PARD6G	-0.53	0.831633	-0.129136	0.395538	0.115009	0.380262
ENSG00000120137	PANK3	-0.300296	0.831593	-0.137983	0.549546	-0.163473	0.605458
ENSG00000184481	FOXO4	0.459503	0.831522	0.464136	0.83055	-0.367644	0.735402
ENSG00000178585	CTNNBIP1	-0.457062	0.831317	-0.688712	0.896562	-0.295229	0.71574
ENSG00000234261	AL138720.1	0.923787	0.831317	0.702352	0.762642	0.781214	0.791985
ENSG00000184983	NDUFA6	-0.333589	0.831277	-0.423748	0.888169	-0.239515	0.729435
ENSG00000135046	ANXA1	-0.823337	0.831198	3.52847	0.997289	1.18193	0.946388
ENSG00000185129	PURA	1.02155	0.831182	0.522604	0.654802	0.304703	0.502169
ENSG00000125249	RAP2A	-0.327958	0.831009	0.273866	0.776986	-0.13197	0.501893
ENSG00000125885	MCM8	-0.326441	0.830906	-0.3075	0.811781	-0.354286	0.84694
ENSG00000077616	NAALAD2	-0.564249	0.830819	-1.46098	0.927319	-1.18457	0.915994
ENSG00000204116	CHIC1	0.406554	0.830708	0.104356	0.346668	0.227015	0.639352
ENSG00000187240	DYNC2H1	-0.312447	0.830234	-0.583379	0.950632	-0.127466	0.51607
ENSG00000156475	PPP2R2B	0.587281	0.83021	0.139414	0.369317	0.988285	0.921637
ENSG00000008735	MAPK8IP2	-1.3518	0.830187	-1.66121	0.84585	-1.52634	0.841021
ENSG00000204469	PRRC2A	0.298794	0.830084	0.0253694	0.154363	0.0825602	0.3629
ENSG00000126749	EMG1	0.409303	0.830068	0.0882263	0.311058	-0.0557442	0.215586
ENSG00000103510	KAT8	0.424009	0.829973	0.0307183	0.116707	0.336638	0.765938
ENSG00000165895	ARHGAP42	-0.362369	0.829918	-0.237633	0.699168	-0.408811	0.860588
ENSG00000008294	SPAG9	0.321875	0.829752	0.467078	0.917227	0.337845	0.84566
ENSG00000121413	ZSCAN18	0.376415	0.829531	-0.409712	0.82313	-0.21684	0.629474
ENSG00000166405	RIC3	0.485247	0.829357	0.190009	0.512949	0.457228	0.813599
ENSG00000129680	MAP7D3	0.416049	0.82927	0.284337	0.703048	0.601491	0.905262
ENSG00000165072	MAMDC2	0.527922	0.829183	0.46522	0.79483	0.245955	0.593366
ENSG00000136856	SLC2A8	-0.559331	0.829128	-0.881048	0.889599	-0.509391	0.810833
ENSG00000125534	PPDPF	0.623505	0.829025	-0.0624348	0.170359	0.0305926	0.0923115
ENSG00000101210	EEF1A2	-0.588394	0.828914	-0.974535	0.891575	-0.0762483	0.253835
ENSG00000176399	DMRTA1	0.797997	0.828859	1.1609	0.898442	0.733876	0.809426
ENSG00000072041	SLC6A15	-0.462925	0.828243	0.066438	0.248904	0.703628	0.932558
ENSG00000011105	TSPAN9	0.42504	0.827958	0.0340736	0.118683	-0.170185	0.497309
ENSG00000152270	PDE3B	0.398857	0.827879	0.509944	0.882036	0.246543	0.674448
ENSG00000153774	CFDP1	0.363636	0.827879	-0.0156211	0.087151	0.123992	0.439003
ENSG00000240342	RPS2P5	0.315644	0.827658	0.0175828	0.101803	0.181723	0.624527
ENSG00000102230	PCYT1B	0.382976	0.827642	0.282751	0.729633	0.176677	0.564221
ENSG00000153993	SEMA3D	-1.00755	0.827626	-1.35878	0.855594	-1.10837	0.838034
ENSG00000111145	ELK3	-0.430012	0.827524	0.0366861	0.156055	-0.212494	0.606121
ENSG00000138668	HNRNPD	0.296672	0.827358	-0.0328479	0.154537	-0.130148	0.519397
ENSG00000157110	RBPMS	0.309261	0.827342	-0.296491	0.809592	-0.294229	0.801437
ENSG00000198185	ZNF334	0.381096	0.827002	-0.09776	0.349742	0.0704723	0.266716
ENSG00000164346	NSA2	0.323053	0.826955	0.149505	0.548527	0.166662	0.599791
ENSG00000138594	TMOD3	-0.323486	0.826947	-0.188719	0.643375	-0.522229	0.92837
ENSG00000122952	ZWINT	-0.315129	0.826828	-0.0451527	0.226397	-0.215932	0.701942
ENSG00000108666	C17orf75	0.382952	0.826496	0.0272854	0.121251	0.0389067	0.162487
ENSG00000113504	SLC12A7	0.397266	0.826291	-0.560135	0.865038	0.305467	0.747651
ENSG00000159199	ATP5MC1	-0.362059	0.826251	-0.139829	0.495405	0.151365	0.533583
ENSG00000105698	USF2	0.398281	0.826227	-0.0129178	0.0518812	-0.0045664	0.019409
ENSG00000280142	AL357562.1	0.933508	0.826188	0.690826	0.749627	0.05172	0.121275
ENSG00000157259	GATAD1	0.373072	0.826172	0.0640422	0.235311	0.32368	0.783008
ENSG00000048991	R3HDM1	0.347638	0.826054	-0.0424654	0.173496	0.0196093	0.0957412
ENSG00000249859	PVT1	0.395865	0.825998	0.531803	0.889062	0.0911771	0.321079
ENSG00000177030	DEAF1	0.440927	0.825856	-0.295157	0.675009	0.275924	0.682825
ENSG00000109472	CPE	-0.505858	0.825817	-0.714859	0.878741	-0.41776	0.783363
ENSG00000131873	CHSY1	-0.312717	0.825769	0.133185	0.510522	-0.229613	0.726424
ENSG00000154096	THY1	-0.304288	0.825745	0.564676	0.954599	0.164641	0.601554
ENSG00000182326	C1S	0.987181	0.825643	1.11977	0.850876	1.32365	0.886414
ENSG00000169570	DTWD2	0.444003	0.825603	2.06913	0.991038	-0.172662	0.487344
ENSG00000113790	EHHADH	1.04312	0.825493	1.1798	0.850457	0.854334	0.777002
ENSG00000142168	SOD1	0.309806	0.825327	0.443299	0.909585	0.546568	0.944152
ENSG00000122257	RBBP6	0.308954	0.825287	0.0207341	0.10675	0.045293	0.231739
ENSG00000084234	APLP2	-0.29082	0.825279	-0.334321	0.860154	-0.382614	0.895068
ENSG00000025039	RRAGD	-0.41056	0.825224	-1.36777	0.957689	-0.284508	0.717178
ENSG00000135679	MDM2	-0.2967	0.825216	1.15214	0.994563	0.108776	0.462055
ENSG00000169116	PARM1	-0.723939	0.825192	-0.0358551	0.124602	-0.79696	0.838619
ENSG00000067369	TP53BP1	-0.303043	0.824908	-0.735867	0.973526	0.0829807	0.361114
ENSG00000182263	FIGN	0.37855	0.824884	-0.0532644	0.195639	-0.145433	0.484175
ENSG00000105281	SLC1A5	0.301083	0.824797	0.759475	0.978125	0.299372	0.823983
ENSG00000213465	ARL2	0.422674	0.824679	-0.106555	0.349971	0.433629	0.830819
ENSG00000172818	OVOL1	-1.00272	0.824607	-0.248843	0.51513	-1.29777	0.851461
ENSG00000035681	NSMAF	-0.376446	0.82441	-0.187078	0.591486	-0.55934	0.900955
ENSG00000108797	CNTNAP1	-1.07558	0.824378	-2.21445	0.88059	-1.6921	0.865638
ENSG00000242247	ARFGAP3	0.556047	0.824283	0.332016	0.669541	0.364614	0.703317
ENSG00000162702	ZNF281	0.296464	0.82426	0.140546	0.541106	0.702214	0.972878
ENSG00000100473	COCH	-0.427107	0.824228	-0.029987	0.121638	-1.55144	0.956962
ENSG00000183741	CBX6	0.385706	0.824204	0.0426717	0.159959	0.945912	0.964983
ENSG00000117308	GALE	-0.580283	0.824165	0.00357229	0.016161	0.135154	0.411857
ENSG00000175550	DRAP1	0.395889	0.82411	-0.00658791	0.0429512	0.363952	0.795344
ENSG00000104723	TUSC3	0.320096	0.824086	0.152933	0.54693	0.124783	0.470938
ENSG00000114770	ABCC5	0.315429	0.823888	0.147778	0.545753	-0.0827291	0.339484
ENSG00000166888	STAT6	-0.368474	0.82388	-0.149237	0.510839	0.232775	0.687464
ENSG00000172965	MIR4435-2HG	0.815901	0.823801	2.21061	0.970057	1.6098	0.940145
ENSG00000179023	KLHDC7A	0.923151	0.823786	1.67013	0.930551	2.58365	0.975312
ENSG00000198690	FAN1	0.330138	0.823778	0.163021	0.561266	0.0920463	0.366583
ENSG00000142409	ZNF787	0.42602	0.823675	0.234672	0.617185	0.228952	0.618521
ENSG00000121060	TRIM25	-0.336581	0.82358	-1.10674	0.973534	-0.898529	0.965197
ENSG00000198369	SPRED2	-0.496438	0.823493	-0.302468	0.686721	-0.364082	0.745375
ENSG00000255769	GOLGA2P10	0.507694	0.823398	0.00263888	0.0136559	0.209359	0.535542
ENSG00000204118	NAP1L6P	0.778855	0.823343	-0.893005	0.74641	-1.89899	0.832858
ENSG00000182287	AP1S2	-0.287302	0.823272	-1.08199	0.992927	-0.390757	0.898917
ENSG00000005448	WDR54	0.556462	0.823193	-0.179113	0.43841	0.517632	0.805364
ENSG00000213949	ITGA1	-0.518829	0.823138	-0.107832	0.342345	-0.374139	0.743526
ENSG00000076248	UNG	0.300382	0.82313	0.219619	0.713646	0.406688	0.901145
ENSG00000146966	DENND2A	-0.624063	0.823066	-0.692738	0.837038	-0.131281	0.373213
ENSG00000227671	AL390728.4	-0.419663	0.823011	-0.110012	0.377552	-0.382983	0.798331
ENSG00000114861	FOXP1	0.374387	0.822853	-0.437009	0.837339	-0.511169	0.868673
ENSG00000171791	BCL2	-0.849007	0.822853	-0.734122	0.798078	-0.584821	0.761591
ENSG00000177051	FBXO46	0.497049	0.822806	0.212344	0.538822	0.328325	0.70078
ENSG00000151498	ACAD8	-0.351238	0.82279	-0.453514	0.880045	-0.0850261	0.356033
ENSG00000147224	PRPS1	0.323155	0.822774	0.267891	0.766025	0.542452	0.934913
ENSG00000103018	CYB5B	-0.313432	0.822774	0.289997	0.807759	0.16847	0.6134
ENSG00000251791	SCARNA6	-0.397628	0.822742	-0.0741557	0.266669	-0.0404958	0.166336
ENSG00000196715	VKORC1L1	0.330142	0.82264	0.172168	0.582295	0.153303	0.54041
ENSG00000183495	EP400	0.318747	0.822569	-0.226765	0.699381	-0.20131	0.651744
ENSG00000163545	NUAK2	0.97295	0.822521	1.53199	0.909878	1.62963	0.920933
ENSG00000124164	VAPB	0.340685	0.822387	0.214508	0.65481	0.0320781	0.138582
ENSG00000079459	FDFT1	-0.291433	0.822245	0.19778	0.689345	0.108917	0.467058
ENSG00000101115	SALL4	0.29306	0.822134	0.195605	0.687361	0.403585	0.904314
ENSG00000275004	ZNF280B	0.578271	0.82211	0.488465	0.776014	0.549814	0.809703
ENSG00000170962	PDGFD	-0.739985	0.822079	-0.710837	0.813307	-0.464706	0.733647
ENSG00000167118	URM1	-0.417005	0.822015	-0.123477	0.406768	-0.320868	0.749129
ENSG00000125257	ABCC4	0.415551	0.822015	0.279653	0.692466	0.425708	0.828172
ENSG00000139505	MTMR6	-0.390838	0.821857	-0.123951	0.420969	-0.251212	0.687606
ENSG00000099810	MTAP	0.298978	0.82181	0.155345	0.588815	0.0850687	0.389216
ENSG00000158246	TENT5B	0.312211	0.821644	-0.000981607	0.0167774	0.254806	0.751784
ENSG00000162368	CMPK1	-0.336864	0.821589	-0.0765927	0.323671	-0.333996	0.813812
ENSG00000142632	ARHGEF19	0.354455	0.821549	-0.155799	0.525585	0.00651111	0.0487676
ENSG00000175215	CTDSP2	0.30918	0.821431	-0.101096	0.406017	0.0823095	0.346589
ENSG00000166949	SMAD3	-0.464076	0.821391	-0.338442	0.73899	-0.512699	0.841385
ENSG00000279099	AC090740.1	0.678398	0.821154	-0.214057	0.444582	0.0676274	0.184283
ENSG00000133874	RNF122	-0.519441	0.821114	-0.649468	0.856748	-1.00695	0.90757
ENSG00000185989	RASA3	-0.485263	0.821043	0.0966394	0.327401	0.0517612	0.183809
ENSG00000111186	WNT5B	-1.2879	0.820996	-0.0882171	0.222714	-1.99997	0.857743
ENSG00000253250	C8orf88	0.941768	0.820901	1.27067	0.881357	0.959308	0.824829
ENSG00000071794	HLTF	0.299948	0.820862	-0.672701	0.960202	0.220583	0.713329
ENSG00000173175	ADCY5	-0.454633	0.820814	-1.44027	0.946143	-0.422571	0.804487
ENSG00000084073	ZMPSTE24	-0.314448	0.820759	-0.0101036	0.0632137	-0.301297	0.810517
ENSG00000204386	NEU1	-0.384249	0.820696	-0.0372873	0.164613	-0.189684	0.591225
ENSG00000163435	ELF3	1.19938	0.820569	1.38778	0.852054	1.0947	0.797225
ENSG00000163479	SSR2	-0.307672	0.82053	-0.140015	0.530635	0.529273	0.940753
ENSG00000081479	LRP2	0.593157	0.820498	-0.136508	0.347893	-0.312125	0.596733
ENSG00000056487	PHF21B	0.4475	0.820435	-0.697254	0.85866	-0.264005	0.624053
ENSG00000094804	CDC6	-0.298833	0.820419	-0.0474647	0.234102	-0.0669416	0.318787
ENSG00000129484	PARP2	0.398107	0.820308	0.527019	0.883072	0.489312	0.868697
ENSG00000137936	BCAR3	-0.540168	0.82004	-0.0891858	0.284853	-0.718932	0.865638
ENSG00000146776	ATXN7L1	-0.400099	0.819921	-0.931009	0.938707	-0.348993	0.783174
ENSG00000162998	FRZB	-0.90832	0.819882	-2.19722	0.892397	-1.06214	0.838398
ENSG00000072571	HMMR	-0.302678	0.819874	-0.358468	0.867187	-0.270178	0.786105
ENSG00000198205	ZXDA	1.94786	0.819795	0.115389	0.141087	1.72067	0.781569
ENSG00000132561	MATN2	0.55967	0.819621	-0.0142757	0.0429512	0.218741	0.524787
ENSG00000095587	TLL2	-1.10421	0.819589	-0.952572	0.797161	-1.10857	0.819779
ENSG00000054277	OPN3	-0.841817	0.819518	-0.968805	0.834138	0.0128481	0.042074
ENSG00000196739	COL27A1	-0.405671	0.819368	-0.519356	0.867132	-0.896487	0.933799
ENSG00000134884	ARGLU1	0.303387	0.819336	0.043302	0.19345	0.143119	0.540165
ENSG00000273489	AC008264.2	0.974797	0.819249	1.1753	0.858344	0.584333	0.68808
ENSG00000178718	RPP25	-0.368193	0.819115	-1.81928	0.9743	-0.505931	0.886652
ENSG00000103479	RBL2	0.356957	0.819107	-0.264602	0.69577	-0.28169	0.723255
ENSG00000121440	PDZRN3	0.904003	0.819044	0.20112	0.389674	1.3865	0.903777
ENSG00000072071	ADGRL1	0.305789	0.819044	-0.227368	0.707766	0.154302	0.557133
ENSG00000002016	RAD52	0.468479	0.818997	-0.0184905	0.0721359	-0.0839834	0.256316
ENSG00000140511	HAPLN3	0.45455	0.818823	-1.23582	0.911529	0.548003	0.863726
ENSG00000131374	TBC1D5	0.330952	0.818736	0.220031	0.676882	0.0729862	0.292763
ENSG00000182054	IDH2	0.347956	0.818657	0.0841956	0.310655	0.431496	0.872324
ENSG00000169184	MN1	-0.516789	0.818641	-1.95695	0.941457	-1.59225	0.934392
ENSG00000122756	CNTFR	-1.12229	0.818625	-1.82959	0.860391	-2.06062	0.87004
ENSG00000144406	UNC80	1.21672	0.818522	-0.803536	0.59343	1.04518	0.779704
ENSG00000154127	UBASH3B	-0.56661	0.818514	0.517356	0.845083	-0.619504	0.833656
ENSG00000175161	CADM2	0.930796	0.818507	-0.73088	0.658445	1.49298	0.911174
ENSG00000132321	IQCA1	0.949412	0.818499	0.752192	0.758327	0.512711	0.658327
ENSG00000148841	ITPRIP	-0.476299	0.818451	-0.608992	0.860257	0.0866744	0.304428
ENSG00000178187	ZNF454	0.987071	0.818341	0.227991	0.411004	0.167232	0.329337
ENSG00000198093	ZNF649	-0.297507	0.818135	0.164278	0.591825	-0.591925	0.95064
ENSG00000162490	DRAXIN	-0.33769	0.818127	0.0961679	0.38973	-0.297136	0.781451
ENSG00000186314	PRELID2	0.844033	0.81804	0.453186	0.65006	0.308147	0.538285
ENSG00000279602	AC109326.1	1.25995	0.817859	0.793114	0.692166	0.995492	0.757079
ENSG00000126934	MAP2K2	0.319825	0.817772	0.174502	0.587787	0.330023	0.82618
ENSG00000172037	LAMB2	0.3289	0.817503	0.302077	0.787378	0.439569	0.889686
ENSG00000105146	AURKC	1.1812	0.817432	0.327028	0.47221	0.368522	0.507717
ENSG00000165140	FBP1	-0.964609	0.817266	-2.39961	0.889425	-1.71745	0.87185
ENSG00000101017	CD40	1.00651	0.817139	0.336078	0.518686	0.59597	0.682691
ENSG00000113240	CLK4	-0.441093	0.817092	-0.577162	0.867424	-0.567217	0.866302
ENSG00000132031	MATN3	-1.14759	0.817021	-0.132573	0.310916	-1.58538	0.848102
ENSG00000277883	NLRP3P1	0.968295	0.816966	0.681054	0.724694	0.331758	0.525253
ENSG00000023909	GCLM	-0.430789	0.816926	0.160938	0.503971	-0.489415	0.84374
ENSG00000263465	SRSF8	-0.475175	0.816744	-0.36651	0.749255	-0.388811	0.768079
ENSG00000253729	PRKDC	0.27907	0.816673	-0.0379838	0.203131	0.0942972	0.404563
ENSG00000108950	FAM20A	-0.87847	0.816673	-1.8525	0.883854	-2.78222	0.904441
ENSG00000134278	SPIRE1	-0.404688	0.816665	-0.528842	0.871447	-0.766618	0.921352
ENSG00000077274	CAPN6	1.23711	0.81646	1.86586	0.904788	1.45348	0.854843
ENSG00000126003	PLAGL2	0.433282	0.816428	0.225237	0.600566	0.0345408	0.115648
ENSG00000151233	GXYLT1	-0.371092	0.81627	-0.272771	0.719557	-0.171277	0.554928
ENSG00000107186	MPDZ	0.296774	0.816254	-0.0545644	0.23064	0.153198	0.563747
ENSG00000197102	DYNC1H1	0.283601	0.816223	0.0448961	0.20287	0.0725388	0.329859
ENSG00000244627	TPTEP2	0.490604	0.816152	-0.350355	0.676369	-0.403653	0.719573
ENSG00000124243	BCAS4	0.516897	0.816025	-0.22664	0.527608	0.430157	0.765946
ENSG00000100201	DDX17	0.284391	0.815978	-0.144448	0.553379	0.0073193	0.0703419
ENSG00000179218	CALR	-0.278913	0.815954	-0.0346721	0.158781	-0.191162	0.675468
ENSG00000039139	DNAH5	1.5533	0.81578	0.911812	0.660832	1.45574	0.797367
ENSG00000115504	EHBP1	0.330604	0.815733	0.213867	0.657086	0.536048	0.924632
ENSG00000167522	ANKRD11	0.297824	0.815677	0.247935	0.753262	0.0223249	0.109389
ENSG00000165449	SLC16A9	0.415092	0.815606	-0.0125289	0.0484831	0.474795	0.845905
ENSG00000139946	PELI2	0.341379	0.815598	-0.485937	0.879025	0.110789	0.412213
ENSG00000166803	PCLAF	0.545658	0.815583	0.664526	0.856052	1.41982	0.960415
ENSG00000200087	SNORA73B	-0.287586	0.815527	-0.438885	0.914943	-0.644451	0.96345
ENSG00000105499	PLA2G4C	1.61313	0.815464	0.591263	0.533962	2.88243	0.944563
ENSG00000106348	IMPDH1	-0.372576	0.815401	-1.36664	0.965513	-0.760076	0.933894
ENSG00000256188	TAS2R30	0.761932	0.815393	-0.136551	0.304072	-0.360978	0.564877
ENSG00000165061	ZMAT4	0.670443	0.815306	0.0257721	0.080979	0.984357	0.891425
ENSG00000264522	OTUD7B	0.365376	0.815164	0.382308	0.822189	0.934609	0.966105
ENSG00000144749	LRIG1	0.289201	0.81514	-1.35156	0.991584	0.75487	0.977754
ENSG00000161298	ZNF382	0.658577	0.81514	0.239801	0.506413	0.408141	0.685472
ENSG00000169895	SYAP1	0.333402	0.814998	0.180437	0.594591	0.188654	0.618639
ENSG00000111731	C2CD5	0.29849	0.814903	-0.519133	0.927429	-0.592505	0.943654
ENSG00000182362	YBEY	0.709231	0.814848	0.479489	0.709323	0.695183	0.810367
ENSG00000054148	PHPT1	-0.441495	0.8148	0.205775	0.596377	0.0769586	0.282893
ENSG00000122966	CIT	0.309283	0.8148	-0.281811	0.77124	-0.28126	0.773295
ENSG00000144591	GMPPA	-0.41698	0.814674	-0.192498	0.558808	-0.144103	0.456642
ENSG00000123473	STIL	-0.321173	0.81465	0.042471	0.186061	-0.422965	0.881807
ENSG00000118965	WDR35	0.324369	0.814595	0.105481	0.41991	0.584664	0.939694
ENSG00000182154	MRPL41	0.44222	0.814492	0.0358644	0.136906	0.451569	0.819526
ENSG00000095002	MSH2	-0.275094	0.814429	-0.621362	0.96752	-0.246515	0.776219
ENSG00000243244	STON1	0.528893	0.814247	-0.686753	0.802701	0.156375	0.421222
ENSG00000112852	PCDHB2	-0.405889	0.814215	-0.476584	0.84679	-0.494324	0.853903
ENSG00000102409	BEX4	0.391693	0.814215	0.330701	0.76054	0.418456	0.833229
ENSG00000142798	HSPG2	0.316542	0.814049	0.199247	0.646038	0.199127	0.649223
ENSG00000214331	AC009053.2	0.60302	0.814034	0.0383252	0.116573	-0.0715427	0.193521
ENSG00000102096	PIM2	0.293176	0.814018	-0.0503107	0.234046	0.126497	0.516165
ENSG00000073464	CLCN4	0.577213	0.813986	0.504103	0.774354	1.01911	0.918634
ENSG00000100731	PCNX1	0.286239	0.813939	-0.108454	0.450146	0.0722789	0.319917
ENSG00000204650	LINC02210	0.404493	0.813781	-0.332914	0.722599	0.116859	0.390172
ENSG00000138646	HERC5	0.435435	0.813536	1.51488	0.978844	0.644847	0.895914
ENSG00000106052	TAX1BP1	-0.302399	0.813504	-0.160239	0.583093	-0.228733	0.723358
ENSG00000066557	LRRC40	-0.313394	0.813267	-0.326608	0.828496	-0.149674	0.553434
ENSG00000108479	GALK1	0.574903	0.813069	0.0659486	0.19473	0.308743	0.629924
ENSG00000165304	MELK	-0.308395	0.813006	-0.342053	0.837805	-0.238531	0.728985
ENSG00000100439	ABHD4	-0.486967	0.812951	-0.118405	0.369001	-0.234386	0.596306
ENSG00000283236	AC074141.1	0.825477	0.812904	-0.523945	0.623349	-0.765737	0.696726
ENSG00000140332	TLE3	-0.33971	0.812888	-0.0499516	0.211848	-0.586797	0.921882
ENSG00000109814	UGDH	-0.301079	0.812619	-0.356075	0.860027	-0.422966	0.895874
ENSG00000166033	HTRA1	-1.25329	0.812532	-0.975386	0.778693	-0.652513	0.719984
ENSG00000086712	TXLNG	0.299282	0.812477	0.136351	0.526755	0.249153	0.751697
ENSG00000258441	LINC00641	0.374008	0.812477	0.0403123	0.158062	-0.291253	0.71325
ENSG00000181896	ZNF101	-0.329844	0.812279	-0.0587551	0.252341	-0.47039	0.893606
ENSG00000127946	HIP1	0.291667	0.812232	-0.197183	0.672149	0.0608669	0.278831
ENSG00000097096	SYDE2	0.401632	0.812224	0.0402363	0.149456	-0.415846	0.789512
ENSG00000168002	POLR2G	-0.329665	0.812216	0.257116	0.746173	0.110464	0.43095
ENSG00000253953	PCDHGB4	-0.965379	0.8122	-0.586715	0.730336	-0.846653	0.794498
ENSG00000156515	HK1	0.279658	0.812161	0.104386	0.428311	-0.00871965	0.0689827
ENSG00000091490	SEL1L3	-0.303988	0.812034	-0.421882	0.894538	-0.264386	0.766048
ENSG00000063176	SPHK2	0.480206	0.811987	0.0723106	0.219189	0.548624	0.843479
ENSG00000116679	IVNS1ABP	-0.280912	0.81186	0.15265	0.577688	0.399104	0.905895
ENSG00000140416	TPM1	0.278983	0.811797	0.582789	0.960605	0.260518	0.786848
ENSG00000169718	DUS1L	0.347559	0.811647	-0.0892731	0.329756	-0.0304577	0.129154
ENSG00000182621	PLCB1	0.370179	0.811639	-0.697821	0.902599	-0.622952	0.889544
ENSG00000104643	MTMR9	-0.304815	0.811505	-0.150192	0.556271	-0.145319	0.559598
ENSG00000148158	SNX30	0.341537	0.811236	0.248003	0.705356	-0.0845027	0.312362
ENSG00000166439	RNF169	0.338268	0.811086	0.209598	0.640949	0.146416	0.514529
ENSG00000180884	ZNF792	-0.496313	0.810833	-0.711154	0.868625	-0.632836	0.853381
ENSG00000183032	SLC25A21	-0.794786	0.810786	-0.553014	0.744632	-0.539985	0.743707
ENSG00000129654	FOXJ1	-0.879231	0.810738	-1.55255	0.866934	0.765365	0.868523
ENSG00000102098	SCML2	0.424609	0.810319	0.26017	0.649088	0.712392	0.916113
ENSG00000071127	WDR1	0.275107	0.810193	0.571217	0.958068	0.518963	0.947155
ENSG00000167771	RCOR2	-0.35146	0.810066	-0.138022	0.486182	-0.180985	0.584002
ENSG00000146409	SLC18B1	-0.356811	0.810019	-0.377463	0.822102	-0.397193	0.83692
ENSG00000135541	AHI1	0.358328	0.809877	-0.253533	0.669272	-0.211242	0.609101
ENSG00000277639	AC007906.2	1.31643	0.809735	0.228226	0.347853	1.44745	0.834035
ENSG00000183255	PTTG1IP	0.286039	0.809695	0.630511	0.961711	0.341726	0.854796
ENSG00000213020	ZNF611	-0.414737	0.809458	0.0485536	0.188566	-0.995659	0.933443
ENSG00000101255	TRIB3	-0.871781	0.809339	-0.0423849	0.120793	-0.428064	0.676131
ENSG00000077942	FBLN1	-0.298774	0.809292	-0.209628	0.683228	-0.705447	0.961356
ENSG00000104967	NOVA2	1.05861	0.809268	0.222112	0.380207	1.33189	0.862043
ENSG00000069493	CLEC2D	0.597527	0.809189	-0.403571	0.64799	-0.398007	0.649452
ENSG00000225830	ERCC6	0.407318	0.809142	0.234835	0.614862	0.163614	0.484744
ENSG00000173575	CHD2	0.293775	0.809118	-0.0767814	0.343538	-0.111086	0.450557
ENSG00000113594	LIFR	-0.327771	0.809015	-0.210314	0.654913	-0.367228	0.839204
ENSG00000049883	PTCD2	0.409041	0.808992	0.0391274	0.145173	0.190702	0.543975
ENSG00000247516	MIR4458HG	1.984	0.808952	1.38056	0.689432	2.04648	0.818775
ENSG00000139324	TMTC3	-0.287191	0.808881	0.152415	0.567074	-0.202939	0.67757
ENSG00000150457	LATS2	0.405075	0.808865	0.325966	0.739329	0.138495	0.434222
ENSG00000260578	AC110597.1	-1.37895	0.808707	-0.153877	0.331242	-0.549219	0.670505
ENSG00000048342	CC2D2A	0.451668	0.808668	0.194389	0.515264	0.368296	0.750314
ENSG00000158486	DNAH3	1.52468	0.808565	0.276966	0.359763	0.590449	0.547262
ENSG00000162971	TYW5	0.365189	0.808352	0.0036218	0.0178917	-0.17368	0.524447
ENSG00000188917	TRMT2B	0.557318	0.808146	0.310828	0.629442	0.37637	0.698172
ENSG00000120594	PLXDC2	-0.311253	0.808146	-0.486417	0.910802	-0.22086	0.691968
ENSG00000160310	PRMT2	-0.3529	0.808146	0.134681	0.468164	-0.108034	0.407044
ENSG00000149311	ATM	0.283995	0.807956	-0.0455646	0.236599	0.100534	0.430326
ENSG00000166349	RAG1	0.912117	0.807704	-0.276543	0.446511	-0.933489	0.693723
ENSG00000184349	EFNA5	0.749662	0.807688	0.908027	0.847565	0.911905	0.850773
ENSG00000248540	AC010931.1	-1.52716	0.807466	-2.1039	0.831688	-1.77835	0.821288
ENSG00000166946	CCNDBP1	-0.480982	0.807411	-0.24959	0.616656	-0.697619	0.871581
ENSG00000078725	BRINP1	0.545091	0.807135	0.953809	0.912035	0.931431	0.910107
ENSG00000157570	TSPAN18	-0.605996	0.807079	-0.264901	0.585598	-1.35092	0.899114
ENSG00000164066	INTU	0.321875	0.80704	-0.32792	0.798054	-0.100948	0.386379
ENSG00000237945	LINC00649	0.736523	0.806992	0.187494	0.399711	0.404097	0.643217
ENSG00000100167	SEPTIN3	0.389858	0.806905	-1.02667	0.921321	-0.110714	0.360687
ENSG00000140284	SLC27A2	-0.660569	0.806866	-1.32099	0.885126	-0.700701	0.816207
ENSG00000164588	HCN1	0.763806	0.806818	-0.789267	0.713053	-0.154809	0.323892
ENSG00000125124	BBS2	0.503274	0.806739	0.221233	0.535748	0.3597	0.70941
ENSG00000268043	NBPF12	0.409488	0.806597	0.26062	0.653893	0.339869	0.749737
ENSG00000110108	TMEM109	-0.458464	0.806558	-0.0730696	0.240724	-0.380968	0.759916
ENSG00000130066	SAT1	0.295374	0.806518	-1.04772	0.975968	-1.48517	0.9841
ENSG00000110721	CHKA	0.326194	0.806313	0.258428	0.726021	-0.0330766	0.13633
ENSG00000130402	ACTN4	0.284246	0.806044	0.499923	0.93843	0.162944	0.599546
ENSG00000092051	JPH4	0.66041	0.805854	0.0842887	0.208829	1.7943	0.962138
ENSG00000022556	NLRP2	0.284031	0.805846	0.155443	0.594252	-1.87595	0.995314
ENSG00000163689	C3orf67	0.565132	0.805783	-0.223594	0.484191	-0.307137	0.589589
ENSG00000276476	AL136962.1	1.12163	0.805538	0.475635	0.57391	0.777344	0.71054
ENSG00000126870	WDR60	0.494066	0.805499	-0.283242	0.596938	0.315367	0.672789
ENSG00000145864	GABRB2	-1.38737	0.805412	-0.699332	0.708888	-1.06558	0.775263
ENSG00000117322	CR2	0.946809	0.805364	-0.154724	0.28961	1.68063	0.919788
ENSG00000260400	AL513534.3	-0.534894	0.805325	-0.424645	0.749469	-0.209896	0.536949
ENSG00000152377	SPOCK1	-0.524044	0.804677	-1.06732	0.898237	-0.737717	0.861031
ENSG00000184992	BRI3BP	-0.342351	0.804305	-0.233022	0.674488	-0.467877	0.878765
ENSG00000053770	AP5M1	-0.29992	0.804163	-0.170145	0.596654	-0.327249	0.830242
ENSG00000023171	GRAMD1B	0.49526	0.804124	0.173306	0.446226	0.541167	0.82475
ENSG00000185880	TRIM69	-0.895126	0.804108	-0.665492	0.755403	-0.37763	0.634966
ENSG00000160216	AGPAT3	-0.669339	0.804092	-0.651889	0.796529	-1.24409	0.878622
ENSG00000139998	RAB15	-0.332185	0.803966	0.067793	0.28441	-0.264146	0.730312
ENSG00000134294	SLC38A2	-0.272073	0.803871	0.218467	0.729309	-0.33154	0.861845
ENSG00000261609	GAN	0.285936	0.8038	0.219566	0.704297	0.166079	0.607457
ENSG00000051523	CYBA	0.350456	0.80361	-0.0968793	0.349742	0.853923	0.960637
ENSG00000148411	NACC2	-0.386641	0.803563	0.758742	0.947732	-0.201549	0.588649
ENSG00000055917	PUM2	0.279411	0.803555	-0.0902128	0.385818	-0.056348	0.278957
ENSG00000134207	SYT6	-0.32023	0.803199	-1.20882	0.974506	-0.971682	0.96703
ENSG00000117054	ACADM	-0.323044	0.803088	0.0230861	0.101716	0.15963	0.565802
ENSG00000250899	AC125807.2	0.365018	0.803057	0.787296	0.945906	0.280003	0.715471
ENSG00000176928	GCNT4	-0.61361	0.802432	1.16373	0.950719	0.975402	0.93342
ENSG00000269345	VN1R85P	-1.97034	0.80233	-1.97034	0.798702	-1.97034	0.801832
ENSG00000126464	PRR12	0.431384	0.802219	-0.222781	0.552944	0.0134589	0.0481591
ENSG00000113328	CCNG1	-0.266399	0.802203	-0.0418303	0.202135	0.0175779	0.115893
ENSG00000124155	PIGT	-0.350981	0.802132	-0.446959	0.859656	-0.329374	0.78462
ENSG00000176049	JAKMIP2	0.402765	0.802116	-0.186498	0.518899	0.179508	0.521531
ENSG00000181315	ZNF322	0.3977	0.802014	0.222211	0.59603	0.360137	0.770569
ENSG00000163293	NIPAL1	0.734049	0.801808	0.140571	0.314148	0.363073	0.605023
ENSG00000145990	GFOD1	-0.455061	0.801729	-0.507544	0.821644	-0.291909	0.676535
ENSG00000143322	ABL2	0.315293	0.801658	-0.0587899	0.242344	0.707045	0.955832
ENSG00000172840	PDP2	0.393383	0.80165	0.379924	0.790349	0.412809	0.815132
ENSG00000137210	TMEM14B	-0.326597	0.801389	-0.330195	0.799761	0.0293833	0.137776
ENSG00000106976	DNM1	0.369286	0.8012	-0.705768	0.894902	0.0707331	0.255882
ENSG00000168496	FEN1	-0.289891	0.801081	-0.0840781	0.344779	0.149509	0.564221
ENSG00000100918	REC8	0.566258	0.801057	0.330001	0.637859	0.271232	0.574969
ENSG00000130772	MED18	0.732726	0.800963	0.573442	0.734983	0.860782	0.837418
ENSG00000184302	SIX6	-0.651273	0.800876	-3.01477	0.922759	-2.93973	0.923336
ENSG00000205609	EIF3CL	0.598407	0.800852	-0.268344	0.525127	-0.19912	0.439904
ENSG00000110921	MVK	-0.584437	0.800844	0.232294	0.567706	-0.225798	0.545389
ENSG00000234449	NA	-0.8598	0.800828	-0.604975	0.739875	-0.92258	0.810066
ENSG00000141404	GNAL	0.389883	0.800765	-0.654313	0.868562	-0.0557298	0.206482
ENSG00000277103	AL445670.1	0.378668	0.800631	-0.447959	0.808683	-0.636405	0.875272
ENSG00000160877	NACC1	0.282435	0.800607	0.253606	0.760477	0.235784	0.746126
ENSG00000006327	TNFRSF12A	0.370926	0.800552	1.03691	0.967449	0.509981	0.878741
ENSG00000158164	TMSB15A	0.376916	0.800425	-0.519701	0.839646	0.499593	0.869194
ENSG00000095203	EPB41L4B	0.338863	0.800362	-0.0757673	0.292866	0.160315	0.529845
ENSG00000164465	DCBLD1	-0.545466	0.800338	0.183036	0.489746	-0.377406	0.714784
ENSG00000128335	APOL2	0.54348	0.800291	0.312307	0.629442	0.680534	0.852172
ENSG00000172687	ZNF738	0.3099	0.800204	-0.27728	0.751444	0.0411504	0.181075
ENSG00000268089	GABRQ	-0.500003	0.800125	-0.441616	0.768538	-0.752161	0.867495
ENSG00000161800	RACGAP1	-0.300522	0.800117	-0.424253	0.884723	-0.42754	0.889726
ENSG00000166845	C18orf54	-0.308403	0.800101	-0.372628	0.847525	-0.542565	0.920918
ENSG00000147130	ZMYM3	0.293766	0.800077	0.0904517	0.373205	0.319544	0.827816

## Sheet: pR_pG_WT1_HPCs pp > 0.95
ENSG	genes	log2FC_pR_WT1	Posterior_probability_pR	log2FC_pG_WT1	Posterior_probability_pG
ENSG00000183337	BCOR	11.873	0.999658	12.4404	0.99989
ENSG00000159189	C1QC	10.8754	0.998944	11.7762	0.999795
ENSG00000005381	MPO	10.6053	0.999928	13.3269	1
ENSG00000170458	CD14	10.1346	0.999602	10.5383	0.99986
ENSG00000169385	RNASE2	10.102	0.997311	11.6023	0.999776
ENSG00000110077	MS4A6A	9.94255	0.996727	10.9265	0.999496
ENSG00000227124	ZNF717	9.74902	0.995925	8.785	0.993281
ENSG00000233098	CCDC144NL-AS1	9.49595	0.994423	9.30742	0.99655
ENSG00000196415	PRTN3	9.31962	0.992848	11.5128	0.999747
ENSG00000173369	C1QB	9.21493	0.991763	9.91852	0.998405
ENSG00000145850	TIMD4	9.16762	0.991271	9.5531	0.997443
ENSG00000130193	THEM6	9.11317	0.990687	9.28286	0.996426
ENSG00000188856	RPSAP47	8.96375	0.998445	8.50477	0.9987
ENSG00000234444	ZNF736	8.84569	0.986991	9.06973	0.995328
ENSG00000143546	S100A8	8.76323	0.985706	12.3036	0.999883
ENSG00000258227	CLEC5A	8.66823	0.98406	11.1346	0.999597
ENSG00000173372	C1QA	8.6065	0.982988	9.01859	0.994987
ENSG00000127954	STEAP4	8.35759	0.977153	8.82807	0.993609
ENSG00000085265	FCN1	8.34819	0.976941	11.2098	0.999659
ENSG00000231806	PCAT7	8.22009	0.973111	8.28904	0.987183
ENSG00000203747	FCGR3A	8.05659	0.967749	9.99232	0.998535
ENSG00000121807	CCR2	7.97345	0.964851	8.06253	0.983194
ENSG00000121053	EPX	7.97345	0.964851	9.97327	0.998506
ENSG00000160932	LY6E	7.9348	0.999821	9.11488	0.999974
ENSG00000140749	IGSF6	7.31598	0.996633	7.71169	0.998944
ENSG00000183117	CSMD1	7.07984	0.99778	7.12069	0.998938
ENSG00000184470	TXNRD2	7.06113	0.995463	6.8522	0.997115
ENSG00000108798	ABI3	7.04026	0.998572	7.01238	0.999298
ENSG00000163220	S100A9	6.96643	0.997451	10.0398	0.999948
ENSG00000287763		6.85931	0.994195	7.92155	0.999198
ENSG00000171051	FPR1	6.77455	0.977613	8.23407	0.998255
ENSG00000136689	IL1RN	6.66481	0.992278	8.68125	0.999678
ENSG00000162745	OLFML2B	6.60922	0.972798	6.87389	0.989948
ENSG00000093010	COMT	6.55675	0.999465	6.75967	0.999792
ENSG00000137752	CASP1	6.28729	0.987548	6.95246	0.997443
ENSG00000138061	CYP1B1	6.22364	0.99807	5.08703	0.996254
ENSG00000197629	MPEG1	6.19418	0.999055	5.14963	0.998376
ENSG00000163823	CCR1	5.97339	0.998957	6.755	0.999792
ENSG00000268555		5.97179	0.991026	6.27269	0.997115
ENSG00000118785	SPP1	5.81383	0.999094	9.36686	0.99999
ENSG00000165168	CYBB	5.80602	0.999909	6.11929	0.99999
ENSG00000146192	FGD2	5.73023	0.997943	6.3235	0.999496
ENSG00000135218	CD36	5.67791	0.99972	5.94347	0.999886
ENSG00000002587	HS3ST1	5.62968	0.986358	4.37259	0.967183
ENSG00000162896	PIGR	5.62289	0.98627	4.56269	0.973739
ENSG00000114013	CD86	5.58846	0.991271	6.13423	0.997989
ENSG00000169896	ITGAM	5.48556	0.990097	6.98771	0.999272
ENSG00000104760	FGL1	5.4283	0.989211	5.64701	0.996209
ENSG00000171049	FPR2	5.42245	0.965699	7.02212	0.997674
ENSG00000161944	ASGR2	5.41292	0.999759	5.45851	0.999886
ENSG00000163694	RBM47	5.36069	0.998562	5.40428	0.99935
ENSG00000198019	FCGR1B	5.35645	0.988308	5.90584	0.997251
ENSG00000260802	SERTM2	5.34412	0.988145	4.16536	0.973717
ENSG00000183307	TMEM121B	5.28927	0.998426	5.07026	0.99896
ENSG00000100985	MMP9	5.28729	0.999508	5.68857	0.999828
ENSG00000108691	CCL2	5.25356	0.99899	7.32628	0.999938
ENSG00000139626	ITGB7	5.24812	0.958827	6.65955	0.996332
ENSG00000155659	VSIG4	5.18828	0.994908	5.87081	0.998879
ENSG00000260314	MRC1	5.15612	0.999811	4.60482	0.999844
ENSG00000160883	HK3	5.12379	0.975158	6.13573	0.996572
ENSG00000183087	GAS6	5.06951	0.997982	4.95599	0.998843
ENSG00000127951	FGL2	5.00001	0.995863	6.28354	0.999552
ENSG00000112799	LY86	4.87225	0.992072	4.63707	0.994825
ENSG00000275895	U2AF1L5	4.87225	0.97907	4.16536	0.973717
ENSG00000196664	TLR7	4.84625	0.993768	4.78508	0.996709
ENSG00000166927	MS4A7	4.8274	0.991538	4.55504	0.99424
ENSG00000113749	HRH2	4.80906	0.995612	5.84123	0.999399
ENSG00000282608	ADORA3	4.76533	0.962488	4.35212	0.965929
ENSG00000140968	IRF8	4.76309	0.999426	4.58359	0.99962
ENSG00000134955	SLC37A2	4.64182	0.980993	5.26724	0.995835
ENSG00000137491	SLCO2B1	4.6398	0.99911	5.47111	0.999808
ENSG00000091106	NLRC4	4.63836	0.989129	4.68695	0.995179
ENSG00000171659	GPR34	4.63778	0.998305	4.23071	0.998632
ENSG00000151490	PTPRO	4.60922	0.980139	5.44588	0.996741
ENSG00000166401	SERPINB8	4.60922	0.971253	4.18284	0.974136
ENSG00000130592	LSP1	4.57902	0.999449	4.33919	0.99963
ENSG00000277632	CCL3	4.52035	0.994592	4.85617	0.998327
ENSG00000135077	HAVCR2	4.4903	0.995854	4.82504	0.998661
ENSG00000136960	ENPP2	4.37475	0.962471	5.3547	0.994379
ENSG00000102445	RUBCNL	4.36746	0.973421	4.33137	0.985812
ENSG00000163106	HPGDS	4.31788	0.971902	3.55197	0.960572
ENSG00000184060	ADAP2	4.30436	0.989292	4.88105	0.997658
ENSG00000025708	TYMP	4.22409	0.997216	6.39202	0.999883
ENSG00000160307	S100B	4.19303	0.999351	2.70262	0.994831
ENSG00000171631	P2RY6	4.19074	0.995736	4.3156	0.998268
ENSG00000142185	TRPM2	4.03688	0.992229	5.55031	0.999464
ENSG00000204287	HLA-DRA	4.03013	0.977104	4.24838	0.991368
ENSG00000245848	CEBPA	3.97901	0.99808	3.65451	0.998405
ENSG00000136250	AOAH	3.94591	0.986019	4.99367	0.998346
ENSG00000150337	FCGR1A	3.92619	0.997135	4.01257	0.998726
ENSG00000135046	ANXA1	3.92092	0.999364	3.85477	0.999594
ENSG00000120280	TASL	3.90396	0.992803	3.51562	0.993674
ENSG00000179598	PLD6	3.89947	0.954554	4.29323	0.985156
ENSG00000012779	ALOX5	3.88744	0.994778	5.55823	0.999682
ENSG00000178573	MAF	3.84126	0.999615	3.86336	0.999747
ENSG00000169413	RNASE6	3.83955	0.993875	3.16329	0.991228
ENSG00000134531	EMP1	3.80666	0.997519	3.08082	0.99577
ENSG00000149516	MS4A3	3.78979	0.960708	6.62159	0.999444
ENSG00000139572	GPR84	3.78736	0.982897	5.38674	0.998912
ENSG00000118777	ABCG2	3.77761	0.960213	3.20012	0.954682
ENSG00000160712	IL6R	3.77727	0.999518	3.43449	0.999314
ENSG00000117115	PADI2	3.6838	0.965034	6.77029	0.999626
ENSG00000179583	CIITA	3.68322	0.993647	3.51988	0.995773
ENSG00000174600	CMKLR1	3.64986	0.975598	4.78254	0.997307
ENSG00000163131	CTSS	3.6354	0.997839	3.95076	0.999269
ENSG00000276085	CCL3L3	3.62498	0.986404	2.95285	0.980699
ENSG00000249437	NAIP	3.61554	0.995896	4.0875	0.998876
ENSG00000172243	CLEC7A	3.60807	0.999074	4.73591	0.999883
ENSG00000175489	LRRC25	3.59541	0.988692	3.60135	0.994552
ENSG00000145287	PLAC8	3.59225	0.998093	5.0208	0.999847
ENSG00000164111	ANXA5	3.54535	0.999159	3.79933	0.999617
ENSG00000154122	ANKH	3.52918	0.971374	3.37935	0.981767
ENSG00000174123	TLR10	3.51907	0.99482	2.61516	0.988577
ENSG00000185862	EVI2B	3.4941	0.991274	3.5655	0.995984
ENSG00000134061	CD180	3.47743	0.996812	3.6768	0.998687
ENSG00000182580	EPHB3	3.44802	0.991479	2.82573	0.988359
ENSG00000107551	RASSF4	3.43715	0.998673	3.66385	0.999444
ENSG00000101347	SAMHD1	3.4371	0.999113	4.45738	0.999935
ENSG00000145416	MARCHF1	3.42895	0.96785	5.0042	0.998044
ENSG00000121769	FABP3	3.41067	0.979223	4.59353	0.998002
ENSG00000112297	CRYBG1	3.40452	0.994713	4.5327	0.999451
ENSG00000140030	GPR65	3.40118	0.990945	3.5193	0.996098
ENSG00000079215	SLC1A3	3.39641	0.971664	4.5248	0.99691
ENSG00000180543	TSPYL5	3.39059	0.997748	2.97458	0.996137
ENSG00000204103	MAFB	3.38682	0.991528	4.51352	0.999113
ENSG00000178695	KCTD12	3.34686	0.999289	3.40375	0.999412
ENSG00000134256	CD101	3.31282	0.984689	4.75617	0.998934
ENSG00000168329	CX3CR1	3.30356	0.99866	3.22178	0.998824
ENSG00000128815	WDFY4	3.29931	0.998279	2.84311	0.997034
ENSG00000105374	NKG7	3.27934	0.992783	4.26218	0.999136
ENSG00000092068	SLC7A8	3.27487	0.992216	3.26198	0.99566
ENSG00000127124	HIVEP3	3.25666	0.998204	3.17018	0.998558
ENSG00000136630	HLX	3.24932	0.996248	2.39277	0.989409
ENSG00000175591	P2RY2	3.23482	0.950737	4.61516	0.995861
ENSG00000110446	SLC15A3	3.23125	0.981391	3.7338	0.995406
ENSG00000137462	TLR2	3.2205	0.993741	4.15121	0.999204
ENSG00000180767	CHST13	3.14581	0.973773	3.18418	0.986745
ENSG00000175899	A2M	3.11159	0.994752	3.96289	0.999256
ENSG00000139679	LPAR6	3.08848	0.997754	2.57381	0.992849
ENSG00000007237	GAS7	3.08197	0.997751	4.21215	0.999838
ENSG00000132669	RIN2	3.03535	0.997233	3.26191	0.998376
ENSG00000196684	HSH2D	3.01909	0.988148	2.97103	0.992144
ENSG00000171522	PTGER4	3.00718	0.979608	2.76474	0.983447
ENSG00000177663	IL17RA	3.00237	0.998484	3.32606	0.999418
ENSG00000276600	RAB7B	2.9456	0.982779	2.17037	0.96924
ENSG00000141401	IMPA2	2.91456	0.990055	2.76781	0.992781
ENSG00000168234	TTC39C	2.91416	0.982114	2.45988	0.979282
ENSG00000121933	TMIGD3	2.90078	0.989439	4.06062	0.999149
ENSG00000185404	SP140L	2.89497	0.990286	2.08534	0.979844
ENSG00000186469	GNG2	2.88235	0.994804	1.65185	0.971836
ENSG00000204516	MICB	2.88203	0.981472	4.2099	0.998697
ENSG00000240583	AQP1	2.87848	0.990094	3.55131	0.998148
ENSG00000271605	MILR1	2.86897	0.981221	3.21639	0.994129
ENSG00000135185	TMEM243	2.86007	0.974102	2.60298	0.979766
ENSG00000117091	CD48	2.8597	0.992904	3.53077	0.998639
ENSG00000082397	EPB41L3	2.85724	0.993236	3.9916	0.999418
ENSG00000014257	ACP3	2.85567	0.993722	2.29323	0.988138
ENSG00000221869	CEBPD	2.85557	0.994488	2.62225	0.995224
ENSG00000206190	ATP10A	2.84116	0.996528	1.48991	0.970159
ENSG00000143110	C1orf162	2.83357	0.975438	4.4676	0.998785
ENSG00000138678	GPAT3	2.78312	0.987502	2.64802	0.991592
ENSG00000110042	DTX4	2.78006	0.977062	2.25406	0.970312
ENSG00000173706	HEG1	2.77586	0.996326	2.61305	0.996748
ENSG00000158578	ALAS2	2.77015	0.981019	3.8767	0.998259
ENSG00000183779	ZNF703	2.75494	0.982721	2.8078	0.991251
ENSG00000139278	GLIPR1	2.70841	0.996173	1.47032	0.970802
ENSG00000113916	BCL6	2.70644	0.981876	3.26198	0.99566
ENSG00000140575	IQGAP1	2.70409	0.996574	2.81666	0.99743
ENSG00000173198	CYSLTR1	2.70365	0.995746	1.53363	0.969981
ENSG00000275302	CCL4	2.70026	0.981648	2.46773	0.983314
ENSG00000274276	CBSL	2.6991	0.965151	2.20012	0.95731
ENSG00000145569	OTULINL	2.68939	0.986691	2.07459	0.978824
ENSG00000100285	NEFH	2.64432	0.983946	1.77	0.95578
ENSG00000250138		2.64092	0.968254	5.2943	0.999548
ENSG00000126860	EVI2A	2.6311	0.990505	2.41496	0.98937
ENSG00000204525	HLA-C	2.63098	0.99645	3.68863	0.999685
ENSG00000138172	CALHM2	2.62129	0.992059	2.39277	0.990439
ENSG00000151062	CACNA2D4	2.60286	0.992099	3.44276	0.998765
ENSG00000004799	PDK4	2.59648	0.992043	2.72207	0.995182
ENSG00000139354	GAS2L3	2.58774	0.982926	2.8078	0.992716
ENSG00000125538	IL1B	2.57679	0.987134	4.78126	0.99974
ENSG00000086300	SNX10	2.56906	0.988053	2.85648	0.995903
ENSG00000234616	JRK	2.55553	0.990619	2.47269	0.992427
ENSG00000234127	TRIM26	2.54978	0.989455	2.31836	0.991137
ENSG00000278588	H2BC10	2.54715	0.992252	1.7147	0.978808
ENSG00000128604	IRF5	2.52709	0.990501	2.13338	0.989464
ENSG00000069482	GAL	2.52433	0.972492	1.88105	0.953723
ENSG00000120162	MOB3B	2.49742	0.984438	2.15761	0.984714
ENSG00000138180	CEP55	2.48956	0.988252	2.24838	0.988626
ENSG00000150540	HNMT	2.47993	0.977049	2.83857	0.992934
ENSG00000186871	ERCC6L	2.45535	0.981951	1.90213	0.969211
ENSG00000042493	CAPG	2.45262	0.990149	3.02309	0.998161
ENSG00000115232	ITGA4	2.44291	0.992741	1.29339	0.966264
ENSG00000005844	ITGAL	2.43548	0.992513	1.62261	0.979288
ENSG00000118515	SGK1	2.43454	0.991303	3.38637	0.999256
ENSG00000168334	XIRP1	2.43102	0.976798	3.04047	0.995591
ENSG00000188483	IER5L	2.42479	0.98289	2.08579	0.983366
ENSG00000028137	TNFRSF1B	2.41767	0.992529	1.72549	0.97976
ENSG00000106153	CHCHD2	2.41534	0.992689	1.91385	0.982105
ENSG00000157827	FMNL2	2.41338	0.988295	2.91049	0.996374
ENSG00000106066	CPVL	2.40452	0.987131	2.7147	0.995283
ENSG00000129422	MTUS1	2.38494	0.986166	2.13538	0.986803
ENSG00000183486	MX2	2.3761	0.952761	5.84489	0.999776
ENSG00000164124	TMEM144	2.36258	0.988311	2.38901	0.991501
ENSG00000136167	LCP1	2.35472	0.992835	1.79039	0.98076
ENSG00000144485	HES6	2.35095	0.954828	2.00282	0.956875
ENSG00000019582	CD74	2.34137	0.992568	2.86106	0.997398
ENSG00000125454	SLC25A19	2.32793	0.990423	2.03236	0.989691
ENSG00000136159	NUDT15	2.32252	0.985641	1.44721	0.956066
ENSG00000174125	TLR1	2.31932	0.988712	2.91693	0.996631
ENSG00000143119	CD53	2.31666	0.991293	2.07564	0.990393
ENSG00000144909	OSBPL11	2.31505	0.991287	2.13204	0.990575
ENSG00000156299	TIAM1	2.31314	0.987662	2.34951	0.992037
ENSG00000010327	STAB1	2.30325	0.991007	2.56545	0.993752
ENSG00000106799	TGFBR1	2.30188	0.990671	2.58102	0.996832
ENSG00000182718	ANXA2	2.2945	0.990518	3.02748	0.998626
ENSG00000163191	S100A11	2.29151	0.990348	2.75314	0.996823
ENSG00000121858	TNFSF10	2.29096	0.984601	2.53183	0.991624
ENSG00000115165	CYTIP	2.27435	0.985908	1.29966	0.951771
ENSG00000166825	ANPEP	2.26989	0.989778	2.35011	0.993025
ENSG00000198223	CSF2RA	2.25907	0.984927	2.44086	0.991374
ENSG00000088827	SIGLEC1	2.2445	0.979891	5.089	0.99986
ENSG00000109501	WFS1	2.2437	0.960258	2.33137	0.979607
ENSG00000122122	SASH3	2.23007	0.99072	1.41955	0.971176
ENSG00000276043	UHRF1	2.22478	0.990804	1.32534	0.969373
ENSG00000177575	CD163	2.20552	0.986078	3.88919	0.99962
ENSG00000173166	RAPH1	2.19352	0.987291	2.07727	0.989412
ENSG00000022267	FHL1	2.19236	0.987196	1.20095	0.951706
ENSG00000129810	SGO1	2.17593	0.98111	1.90542	0.974929
ENSG00000104689	TNFRSF10A	2.1655	0.983832	2.05066	0.987378
ENSG00000133216	EPHB2	2.16176	0.956259	3.35727	0.996417
ENSG00000129173	E2F8	2.16176	0.985547	1.88581	0.978291
ENSG00000011422	PLAUR	2.16176	0.983408	2.68555	0.995452
ENSG00000011426	ANLN	2.1595	0.989944	1.76219	0.980166
ENSG00000185347	TEDC1	2.158	0.975729	1.94531	0.971949
ENSG00000286403		2.14978	0.950473	1.93334	0.951728
ENSG00000186283	TOR3A	2.14498	0.985524	1.77785	0.97617
ENSG00000164687	FABP5	2.14489	0.98821	1.56737	0.970071
ENSG00000171608	PIK3CD	2.13217	0.990267	1.8174	0.981589
ENSG00000130600	H19	2.13148	0.990368	3.88429	0.999857
ENSG00000170385	SLC30A1	2.1209	0.986098	2.30286	0.990409
ENSG00000135047	CTSL	2.1122	0.964815	3.18632	0.996267
ENSG00000128512	DOCK4	2.10852	0.973075	2.95219	0.995169
ENSG00000162849	KIF26B	2.10577	0.982	1.68453	0.97166
ENSG00000175701	MTLN	2.0954	0.97345	1.60987	0.960351
ENSG00000187037	GPR141	2.09346	0.954916	3.3137	0.995903
ENSG00000077238	IL4R	2.09103	0.988924	2.45501	0.993298
ENSG00000275835	TUBGCP5	2.09101	0.984973	1.61233	0.973629
ENSG00000182162	P2RY8	2.06797	0.985367	2.15176	0.989487
ENSG00000197153	H3C12	2.06659	0.989859	1.21965	0.964068
ENSG00000198363	ASPH	2.06075	0.990195	1.54502	0.97284
ENSG00000188486	H2AX	2.05954	0.990126	1.34275	0.969405
ENSG00000049759	NEDD4L	2.05282	0.973013	2.15121	0.98436
ENSG00000166851	PLK1	2.04252	0.990107	1.57181	0.972768
ENSG00000104783	KCNN4	2.04065	0.972694	2.02504	0.982459
ENSG00000184357	H1-5	2.0391	0.990296	1.22089	0.965149
ENSG00000167850	CD300C	2.03013	0.957709	2.57788	0.989847
ENSG00000174130	TLR6	2.02806	0.98778	1.89027	0.98063
ENSG00000110274	CEP164	2.01336	0.987525	1.47077	0.968954
ENSG00000203760	CENPW	2.00886	0.967123	1.59738	0.955634
ENSG00000132205	EMILIN2	2.00666	0.989282	1.97449	0.981699
ENSG00000100292	HMOX1	2.006	0.950313	3.02813	0.994217
ENSG00000142634	EFHD2	1.99759	0.989977	1.6265	0.979496
ENSG00000145386	CCNA2	1.99268	0.979255	1.5634	0.972771
ENSG00000099250	NRP1	1.99107	0.978982	2.50371	0.993603
ENSG00000110660	SLC35F2	1.98912	0.97657	1.26493	0.960543
ENSG00000160957	RECQL4	1.98243	0.978597	1.32534	0.968346
ENSG00000090382	LYZ	1.97941	0.978923	4.57971	0.999984
ENSG00000276903	H2AC16	1.97288	0.978447	1.51634	0.97181
ENSG00000166224	SGPL1	1.97043	0.972306	2.35502	0.991751
ENSG00000123643	SLC36A1	1.96649	0.975015	1.5621	0.968473
ENSG00000075239	ACAT1	1.95834	0.97581	1.72863	0.977531
ENSG00000130707	ASS1	1.95406	0.978949	1.82737	0.981426
ENSG00000140534	TICRR	1.953	0.978362	1.5383	0.971849
ENSG00000113269	RNF130	1.9435	0.978216	1.27961	0.964298
ENSG00000160255	ITGB2	1.94253	0.979425	1.6832	0.979916
ENSG00000186185	KIF18B	1.93936	0.978551	1.45372	0.970754
ENSG00000126001	CEP250	1.9205	0.975207	1.34284	0.963619
ENSG00000159399	HK2	1.9191	0.979004	1.31704	0.969165
ENSG00000100242	SUN2	1.91878	0.979011	1.24515	0.964779
ENSG00000065413	ANKRD44	1.91666	0.975246	1.92328	0.980234
ENSG00000164733	CTSB	1.90582	0.97933	2.40499	0.993548
ENSG00000274750	H3C6	1.90495	0.979066	-5.94708	0.998973
ENSG00000138119	MYOF	1.90229	0.973838	2.78881	0.996319
ENSG00000099860	GADD45B	1.89602	0.973783	1.79517	0.977502
ENSG00000117399	CDC20	1.89394	0.978646	1.50488	0.972125
ENSG00000089041	P2RX7	1.89232	0.950088	2.45505	0.987654
ENSG00000197405	C5AR1	1.8915	0.972479	2.4853	0.992424
ENSG00000122694	GLIPR2	1.88432	0.964356	3.06316	0.997521
ENSG00000138604	GLCE	1.88118	0.974278	1.36106	0.963415
ENSG00000140157	NIPA2	1.88019	0.978665	1.65493	0.979366
ENSG00000139618	BRCA2	1.87907	0.978173	1.41538	0.970413
ENSG00000115594	IL1R1	1.87225	0.959557	1.60576	0.964009
ENSG00000109099	PMP22	1.8646	0.964929	2.83099	0.996004
ENSG00000117650	NEK2	1.86113	0.96783	1.75447	0.97424
ENSG00000189067	LITAF	1.85739	0.977039	2.28866	0.991501
ENSG00000176597	B3GNT5	1.8545	0.977446	1.29773	0.964422
ENSG00000140287	HDC	1.84808	0.957774	2.42593	0.989493
ENSG00000111206	FOXM1	1.84262	0.978506	1.99154	0.982031
ENSG00000187741	FANCA	1.83862	0.977818	1.23855	0.963551
ENSG00000089685	BIRC5	1.83503	0.977802	1.44763	0.970673
ENSG00000274641	H2BC17	1.83267	0.978688	1.45699	0.97216
ENSG00000197747	S100A10	1.82879	0.976286	1.78143	0.979347
ENSG00000075218	GTSE1	1.82541	0.976827	1.78015	0.979597
ENSG00000121691	CAT	1.82482	0.977358	2.41699	0.993301
ENSG00000018280	SLC11A1	1.82262	0.96916	3.65202	0.999389
ENSG00000181523	SGSH	1.81449	0.973193	1.69661	0.976634
ENSG00000111696	NT5DC3	1.81409	0.959639	1.47238	0.954386
ENSG00000134769	DTNA	1.8084	0.957341	2.0208	0.983886
ENSG00000172232	AZU1	1.80719	0.963638	3.54276	0.998912
ENSG00000118193	KIF14	1.80186	0.97656	1.61127	0.978889
ENSG00000115163	CENPA	1.80186	0.966435	1.46492	0.962183
ENSG00000111424	VDR	1.80186	0.957439	2.17906	0.986485
ENSG00000135476	ESPL1	1.8006	0.976729	1.64808	0.979136
ENSG00000007968	E2F2	1.7972	0.976178	1.35345	0.968083
ENSG00000119900	OGFRL1	1.79653	0.977808	1.81957	0.981738
ENSG00000071073	MGAT4A	1.78805	0.953592	2.77743	0.994474
ENSG00000165490	DDIAS	1.78805	0.953592	1.51352	0.952225
ENSG00000148773	MKI67	1.78149	0.977847	1.77085	0.980737
ENSG00000139734	DIAPH3	1.77221	0.973975	1.58337	0.977109
ENSG00000278771	RN7SL3	1.77027	0.975471	1.42906	0.969617
ENSG00000104267	CA2	1.76889	0.976739	2.0856	0.991205
ENSG00000210082	MT-RNR2	1.76466	0.9618	2.6485	0.99513
ENSG00000075702	WDR62	1.763	0.97492	1.48398	0.970224
ENSG00000156970	BUB1B	1.7572	0.976882	1.27356	0.964951
ENSG00000143815	LBR	1.75002	0.977635	1.26191	0.965919
ENSG00000023697	DERA	1.74359	0.971797	1.97439	0.980322
ENSG00000138160	KIF11	1.73799	0.977336	1.24893	0.964977
ENSG00000161647	MPP3	1.73709	0.950372	1.53772	0.952557
ENSG00000130309	COLGALT1	1.73528	0.977665	1.47077	0.97243
ENSG00000113368	LMNB1	1.72894	0.977251	1.33427	0.969721
ENSG00000163453	IGFBP7	1.72409	0.974157	1.25322	0.961696
ENSG00000171848	RRM2	1.7222	0.977101	1.37239	0.969886
ENSG00000024526	DEPDC1	1.72128	0.974835	1.21279	0.960084
ENSG00000111335	OAS2	1.7177	0.962325	5.06959	0.999893
ENSG00000121152	NCAPH	1.71089	0.976169	1.22499	0.963856
ENSG00000204267	TAP2	1.70941	0.969388	1.44168	0.965617
ENSG00000187210	GCNT1	1.70657	0.971002	1.27935	0.959204
ENSG00000111665	CDCA3	1.70654	0.973124	1.83126	0.980188
ENSG00000060558	GNA15	1.70578	0.974366	1.36342	0.967349
ENSG00000171488	LRRC8C	1.70429	0.976579	1.26014	0.965175
ENSG00000203814	H2BC18	1.69694	0.977156	1.21663	0.965081
ENSG00000163808	KIF15	1.69275	0.974516	1.24274	0.962316
ENSG00000108439	PNPO	1.69261	0.974976	1.54875	0.971673
ENSG00000138670	RASGEF1B	1.69162	0.968952	1.96477	0.979838
ENSG00000132274	TRIM22	1.69108	0.952585	4.58231	0.999779
ENSG00000171680	PLEKHG5	1.68939	0.954342	2.09936	0.985799
ENSG00000139629	GALNT6	1.68733	0.9665	1.83134	0.977911
ENSG00000147036	LANCL3	1.68638	0.957005	2.12973	0.986946
ENSG00000079974	RABL2B	1.6691	0.969167	1.4033	0.964282
ENSG00000137812	KNL1	1.66793	0.976038	1.59158	0.979272
ENSG00000051341	POLQ	1.65972	0.974288	1.42215	0.969685
ENSG00000178999	AURKB	1.65323	0.975536	1.43476	0.970682
ENSG00000109805	NCAPG	1.65099	0.975976	1.20302	0.962031
ENSG00000151491	EPS8	1.64574	0.971999	1.5849	0.977079
ENSG00000164125	GASK1B	1.64509	0.970366	2.70801	0.996413
ENSG00000142166	IFNAR1	1.64381	0.975507	1.29711	0.965201
ENSG00000112773	TENT5A	1.64159	0.97447	2.26048	0.991559
ENSG00000114554	PLXNA1	1.63936	0.975856	1.7147	0.979695
ENSG00000136830	NIBAN2	1.63631	0.976156	1.59902	0.979386
ENSG00000110057	UNC93B1	1.63552	0.974793	1.90633	0.981572
ENSG00000068724	TTC7A	1.63158	0.974979	1.50441	0.971673
ENSG00000047634	SCML1	1.62968	0.971354	1.30423	0.96127
ENSG00000123485	HJURP	1.6288	0.975015	1.38344	0.968996
ENSG00000198879	SFMBT2	1.62677	0.973708	1.81947	0.980643
ENSG00000134690	CDCA8	1.61966	0.97536	1.29803	0.965185
ENSG00000155846	PPARGC1B	1.6169	0.975465	1.3711	0.96898
ENSG00000173530	TNFRSF10D	1.60679	0.972808	1.87009	0.980871
ENSG00000166446	CDYL2	1.60646	0.958821	1.4323	0.958973
ENSG00000066279	ASPM	1.60644	0.976495	1.51478	0.972713
ENSG00000237649	KIFC1	1.59973	0.975246	1.49521	0.971865
ENSG00000134057	CCNB1	1.58977	0.976348	1.36698	0.969656
ENSG00000134247	PTGFRN	1.58463	0.974421	1.56327	0.971754
ENSG00000179630	LACC1	1.58117	0.97287	1.75306	0.979276
ENSG00000188312	CENPP	1.58013	0.963244	1.26184	0.953311
ENSG00000111962	UST	1.56739	0.957487	1.67075	0.975195
ENSG00000129667	RHBDF2	1.56523	0.968274	1.39277	0.969613
ENSG00000132386	SERPINF1	1.56103	0.965686	1.61095	0.978148
ENSG00000101057	MYBL2	1.55654	0.969144	1.43305	0.971514
ENSG00000157456	CCNB2	1.55169	0.967964	1.34981	0.968772
ENSG00000149294	NCAM1	1.53753	0.966637	3.0212	0.998571
ENSG00000106785	TRIM14	1.53631	0.953436	3.39625	0.998996
ENSG00000062716	VMP1	1.53455	0.96933	1.60142	0.979737
ENSG00000089220	PEBP1	1.52818	0.969147	1.69619	0.98001
ENSG00000057657	PRDM1	1.52512	0.962318	2.41231	0.992765
ENSG00000142733	MAP3K6	1.51826	0.951085	1.67418	0.973093
ENSG00000147536	GINS4	1.51265	0.961898	1.21455	0.956572
ENSG00000205181	LINC00654	1.5106	0.963974	1.79365	0.979188
ENSG00000213699	SLC35F6	1.5066	0.966973	1.31914	0.968093
ENSG00000162711	NLRP3	1.49553	0.962348	1.66275	0.977469
ENSG00000166068	SPRED1	1.4874	0.967387	1.53335	0.972138
ENSG00000112984	KIF20A	1.47622	0.967605	1.41726	0.970997
ENSG00000145819	ARHGAP26	1.47521	0.964724	1.85648	0.980728
ENSG00000169607	CKAP2L	1.47381	0.965633	1.44349	0.970205
ENSG00000133246	PRAM1	1.4722	0.968293	1.97277	0.982076
ENSG00000126787	DLGAP5	1.46453	0.967205	1.23601	0.964003
ENSG00000113552	GNPDA1	1.46178	0.965624	1.38204	0.9686
ENSG00000154237	LRRK1	1.43783	0.960007	1.49145	0.969243
ENSG00000057252	SOAT1	1.43599	0.965376	1.26198	0.964172
ENSG00000169032	MAP2K1	1.43128	0.965164	1.23749	0.963194
ENSG00000176438	SYNE3	1.41911	0.966931	1.23109	0.964357
ENSG00000102384	CENPI	1.41113	0.956307	1.3103	0.960422
ENSG00000184988	TMEM106A	1.41086	0.959453	1.55878	0.970367
ENSG00000167613	LAIR1	1.40788	0.965076	1.8522	0.98141
ENSG00000003989	SLC7A2	1.39444	0.959528	2.17482	0.991001
ENSG00000172340	SUCLG2	1.391	0.964372	1.28649	0.965042
ENSG00000102760	RGCC	1.39057	0.961872	1.30257	0.963632
ENSG00000117724	CENPF	1.38948	0.966471	1.28688	0.966257
ENSG00000120889	TNFRSF10B	1.35201	0.965542	1.2413	0.964906
ENSG00000010818	HIVEP2	1.34783	0.953817	1.7338	0.977417
ENSG00000135451	TROAP	1.30878	0.959932	1.25339	0.964243
ENSG00000185650	ZFP36L1	1.30749	0.962201	1.62183	0.979808
ENSG00000171365	CLCN5	1.30643	0.954955	1.55923	0.970945
ENSG00000117394	SLC2A1	1.29773	0.959479	1.53064	0.972096
ENSG00000163565	IFI16	1.29035	0.962035	1.7257	0.980123
ENSG00000196743	GM2A	1.28166	0.959632	1.3606	0.969025
ENSG00000184384	MAML2	1.27672	0.954058	1.85188	0.98052
ENSG00000151474	FRMD4A	1.26943	0.955147	1.86632	0.981059
ENSG00000069974	RAB27A	1.26919	0.954912	1.72306	0.978808
ENSG00000162739	SLAMF6	1.26321	0.960164	-2.71686	0.995036
ENSG00000164691	TAGAP	1.24213	0.954055	1.74517	0.979418
ENSG00000221963	APOL6	1.22226	0.956069	2.56837	0.993493
ENSG00000010292	NCAPD2	1.21872	0.960803	1.24052	0.965227
ENSG00000171766	GATM	1.21164	0.952337	1.46939	0.970715
ENSG00000101445	PPP1R16B	-1.2039	0.957605	-1.24488	0.964799
ENSG00000065675	PRKCQ	-1.20485	0.958452	-1.52269	0.972843
ENSG00000112299	VNN1	-1.21642	0.960803	-4.06122	0.999854
ENSG00000095370	SH2D3C	-1.23979	0.960574	-1.79097	0.980569
ENSG00000100968	NFATC4	-1.26636	0.961578	-1.42746	0.971595
ENSG00000157680	DGKI	-1.27009	0.961976	-1.20857	0.96334
ENSG00000134323	MYCN	-1.28785	0.961868	-1.80063	0.980601
ENSG00000237943	PRKCQ-AS1	-1.29922	0.961119	-1.65047	0.979409
ENSG00000137502	RAB30	-1.3005	0.952265	2.94216	0.997398
ENSG00000100678	SLC8A3	-1.34237	0.965425	-1.7606	0.980435
ENSG00000184005	ST6GALNAC3	-1.34904	0.961751	-1.31983	0.967602
ENSG00000188404	SELL	-1.3586	0.957514	-1.2702	0.961579
ENSG00000245694	CRNDE	-1.35886	0.964483	-1.21852	0.964211
ENSG00000245849	RAD51-AS1	-1.37011	0.956327	-1.28157	0.961205
ENSG00000155307	SAMSN1	-1.37394	0.966165	-1.51199	0.972853
ENSG00000183690	EFHC2	-1.37613	0.96652	-1.24214	0.965175
ENSG00000065600	PACC1	-1.37726	0.965584	-1.55906	0.972521
ENSG00000120594	PLXDC2	-1.37799	0.966719	-1.65434	0.979867
ENSG00000196083	IL1RAP	-1.37816	0.965343	-1.42503	0.971114
ENSG00000152128	TMEM163	-1.39876	0.965151	-1.76552	0.98011
ENSG00000204420	MPIG6B	-1.4006	0.966931	-1.25972	0.966127
ENSG00000105371	ICAM4	-1.41623	0.967211	-1.66135	0.979493
ENSG00000102349	KLF8	-1.42319	0.967306	-2.92596	0.997232
ENSG00000005249	PRKAR2B	-1.42844	0.968244	-1.37896	0.970452
ENSG00000087589	CASS4	-1.45502	0.968854	-1.51729	0.972943
ENSG00000164185	ZNF474	-1.45748	0.952428	-4.27257	0.995994
ENSG00000170802	FOXN2	-1.45928	0.968981	-1.52584	0.973018
ENSG00000163072	NOSTRIN	-1.47742	0.952194	-2.25109	0.986335
ENSG00000061918	GUCY1B1	-1.48573	0.969199	-1.21138	0.963252
ENSG00000247081	BAALC-AS1	-1.48808	0.955356	-1.33488	0.962212
ENSG00000153982	GDPD1	-1.49989	0.966852	-1.23342	0.963785
ENSG00000090530	P3H2	-1.50207	0.965992	-2.46371	0.992593
ENSG00000172794	RAB37	-1.50634	0.969297	-1.22329	0.965159
ENSG00000204710	SPDYC	-1.50959	0.968746	-3.4855	0.999253
ENSG00000168765	GSTM4	-1.51018	0.967811	-1.37158	0.969201
ENSG00000286329		-1.52544	0.959769	-6.6787	0.99783
ENSG00000100365	NCF4	-1.52673	0.969473	-1.89439	0.982135
ENSG00000125388	GRK4	-1.53799	0.957846	-1.22219	0.958155
ENSG00000128965	CHAC1	-1.54375	0.969323	-1.49559	0.972752
ENSG00000168209	DDIT4	-1.54934	0.969512	-1.30012	0.96653
ENSG00000176533	GNG7	-1.55987	0.961386	-2.53389	0.99115
ENSG00000110934	BIN2	-1.56283	0.969604	-1.46822	0.972541
ENSG00000149328	GLB1L2	-1.58123	0.974203	-1.98466	0.981131
ENSG00000183484	GPR132	-1.58235	0.971416	-1.33295	0.966582
ENSG00000171777	RASGRP4	-1.58472	0.97684	-1.52337	0.972947
ENSG00000197301	HMGA2-AS1	-1.59503	0.953696	-4.17405	0.993629
ENSG00000262370		-1.60253	0.963244	-2.27466	0.987089
ENSG00000011198	ABHD5	-1.60533	0.976439	-1.45482	0.971644
ENSG00000081051	AFP	-1.60658	0.959782	-3.66698	0.994951
ENSG00000187994	RINL	-1.60936	0.9764	-1.44872	0.971595
ENSG00000205436	EXOC3L4	-1.63096	0.975748	-2.27365	0.991559
ENSG00000254860	TMEM9B-AS1	-1.63467	0.968124	-1.2402	0.959717
ENSG00000267121	FMNL1-DT	-1.63555	0.950134	-2.14261	0.980595
ENSG00000253846	PCDHGA10	-1.64036	0.961712	-1.60723	0.972238
ENSG00000205336	ADGRG1	-1.64418	0.97685	-1.9367	0.982183
ENSG00000170689	HOXB9	-1.64514	0.976882	-3.87128	0.999815
ENSG00000117691	NENF	-1.65713	0.975187	-1.45125	0.970848
ENSG00000163092	XIRP2	-1.6595	0.975601	-3.08281	0.998281
ENSG00000070669	ASNS	-1.66446	0.963107	-1.73652	0.974237
ENSG00000116990	MYCL	-1.66859	0.959707	-1.28949	0.955221
ENSG00000107736	CDH23	-1.67619	0.965601	-1.4332	0.965357
ENSG00000151962	RBM46	-1.68209	0.968456	-9.70363	0.997917
ENSG00000071909	MYO3B	-1.68435	0.976266	-1.60272	0.97937
ENSG00000198794	SCAMP5	-1.68506	0.976964	-1.8672	0.982079
ENSG00000152689	RASGRP3	-1.69324	0.977088	-1.33335	0.969786
ENSG00000228274		-1.69877	0.963172	-1.35513	0.961442
ENSG00000255491		-1.72518	0.973509	-1.74961	0.978899
ENSG00000261211		-1.73248	0.971758	-1.33659	0.96627
ENSG00000185052	SLC24A3	-1.73503	0.977678	-1.32649	0.96973
ENSG00000262877		-1.73749	0.962426	-1.4448	0.962775
ENSG00000263934	SNORD3A	-1.7382	0.977759	-1.66005	0.979903
ENSG00000167553	TUBA1C	-1.75796	0.977857	-1.73315	0.980218
ENSG00000181264	TLCD5	-1.77641	0.973685	-1.20342	0.960198
ENSG00000183891	TTC32	-1.79047	0.969822	-1.21867	0.959477
ENSG00000173210	ABLIM3	-1.81257	0.978783	-1.48643	0.972609
ENSG00000206052	DOK6	-1.82743	0.978349	-4.18688	0.99974
ENSG00000186088	GSAP	-1.82824	0.978848	-1.44005	0.971784
ENSG00000112541	PDE10A	-1.83969	0.978206	-2.39013	0.99322
ENSG00000188906	LRRK2	-1.85486	0.960809	1.21106	0.960312
ENSG00000049089	COL9A2	-1.85855	0.970555	-1.64615	0.975383
ENSG00000180574	EIF2S3B	-1.86584	0.969679	-2.99365	0.994246
ENSG00000235513	L3MBTL2-AS1	-1.87348	0.977987	-1.82829	0.981114
ENSG00000166342	NETO1	-1.87915	0.962693	-1.75291	0.971975
ENSG00000106333	PCOLCE	-1.88107	0.951672	1.26623	0.961826
ENSG00000070526	ST6GALNAC1	-1.88476	0.972541	-4.37707	0.997979
ENSG00000139219	COL2A1	-1.88514	0.979432	-2.37773	0.99358
ENSG00000235609		-1.89204	0.962709	-1.67435	0.970634
ENSG00000127241	MASP1	-1.90977	0.977707	-1.27097	0.96486
ENSG00000187672	ERC2	-1.92319	0.966262	-1.63379	0.972502
ENSG00000255240		-1.92773	0.95205	1.62464	0.977762
ENSG00000147180	ZNF711	-1.93511	0.978988	-1.3463	0.969555
ENSG00000245213		-1.93757	0.965689	-1.45968	0.963619
ENSG00000181409	AATK	-1.93911	0.975057	-1.31301	0.963398
ENSG00000182912	TSPEAR-AS2	-1.9423	0.953615	-2.25828	0.980032
ENSG00000077943	ITGA8	-1.9543	0.97655	-1.5758	0.978142
ENSG00000289263		-1.95918	0.955711	-2.08382	0.979925
ENSG00000237118	CYP2F2P	-1.97602	0.97921	-1.91214	0.982057
ENSG00000263155	MYZAP	-1.97722	0.976801	-1.87453	0.980796
ENSG00000173110	HSPA6	-1.98799	0.967778	-1.41911	0.964038
ENSG00000162614	NEXN	-1.99333	0.979213	-1.46507	0.972342
ENSG00000105699	LSR	-2.00882	0.974086	1.25056	0.962908
ENSG00000120057	SFRP5	-2.01361	0.985002	-2.07568	0.988925
ENSG00000139915	MDGA2	-2.01832	0.956953	-4.01237	0.987947
ENSG00000215481	BCRP3	-2.04516	0.959596	-2.68252	0.983697
ENSG00000185133	INPP5J	-2.05019	0.986981	-1.40646	0.968242
ENSG00000096264	NCR2	-2.0528	0.979229	-3.63182	0.996036
ENSG00000265107	GJA5	-2.06896	0.981022	3.67853	0.999662
ENSG00000213658	LAT	-2.07058	0.985501	-1.20533	0.959175
ENSG00000155158	TTC39B	-2.07193	0.98968	-1.53761	0.972567
ENSG00000128596	CCDC136	-2.08513	0.979344	-1.33237	0.961657
ENSG00000128683	GAD1	-2.08928	0.990443	-1.33056	0.969828
ENSG00000235890	TSPEAR-AS1	-2.09311	0.98143	-2.40465	0.989753
ENSG00000117226	GBP3	-2.10503	0.952441	-1.6947	0.955354
ENSG00000187231	SESTD1	-2.11026	0.990335	-2.09558	0.991485
ENSG00000213366	GSTM2	-2.11495	0.98746	-1.51577	0.971105
ENSG00000260563		-2.11815	0.980031	-1.32189	0.962005
ENSG00000235706	DICER1-AS1	-2.11911	0.978698	-1.30884	0.957541
ENSG00000225177		-2.12181	0.974721	-1.437	0.960608
ENSG00000272398	CD24	-2.13148	0.990498	-3.03108	0.998736
ENSG00000110665	C11orf21	-2.13857	0.990553	-2.11031	0.991546
ENSG00000166833	NAV2	-2.14887	0.990126	-1.43973	0.971608
ENSG00000223745	CCDC18-AS1	-2.15535	0.99028	-2.21008	0.991806
ENSG00000103316	CRYM	-2.1575	0.958309	3.92229	0.999743
ENSG00000174951	FUT1	-2.1676	0.990655	-1.54465	0.97284
ENSG00000230773		-2.17214	0.986182	-1.90031	0.979539
ENSG00000159251	ACTC1	-2.17642	0.970021	2.41089	0.993083
ENSG00000104894	CD37	-2.17701	0.990488	-1.50865	0.972687
ENSG00000197928	ZNF677	-2.1991	0.985377	-1.27607	0.961761
ENSG00000167555	ZNF528	-2.2137	0.985879	-1.65504	0.976767
ENSG00000137878	GCOM1	-2.21664	0.99072	-2.15358	0.991429
ENSG00000138792	ENPEP	-2.23241	0.980269	-1.88251	0.976313
ENSG00000233968		-2.23454	0.989318	-4.49962	0.999396
ENSG00000163132	MSX1	-2.26287	0.990638	-3.21197	0.998681
ENSG00000136929	HEMGN	-2.27901	0.99086	-2.4621	0.993635
ENSG00000205309	NT5M	-2.28246	0.99071	-1.4251	0.971517
ENSG00000165929	TC2N	-2.28678	0.990967	-1.72157	0.980156
ENSG00000244067	GSTA2	-2.28762	0.970353	-1.57071	0.958587
ENSG00000132932	ATP8A2	-2.2887	0.991023	-3.10923	0.998743
ENSG00000160588	MPZL3	-2.2932	0.990964	-2.67808	0.996933
ENSG00000142512	SIGLEC10	-2.29406	0.989761	-1.40548	0.969545
ENSG00000144278	GALNT13	-2.30856	0.984207	-1.67762	0.975614
ENSG00000250337	PURPL	-2.31438	0.990977	-1.44303	0.971842
ENSG00000183496	MEX3B	-2.35106	0.992672	-1.31585	0.969721
ENSG00000272068	BCAN-AS1	-2.36806	0.982792	-1.34717	0.961962
ENSG00000133106	EPSTI1	-2.37577	0.991652	1.24593	0.965328
ENSG00000175556	LONRF3	-2.38309	0.985263	-1.97391	0.97808
ENSG00000261366	MANEA-DT	-2.42696	0.950597	-1.77716	0.951793
ENSG00000261218		-2.43027	0.961653	-1.87292	0.962339
ENSG00000198547	C20orf203	-2.43624	0.965115	-1.77716	0.962359
ENSG00000215146		-2.44462	0.991222	-1.3399	0.968538
ENSG00000259065		-2.45497	0.969799	-1.38167	0.950949
ENSG00000287430		-2.45941	0.991613	-2.371	0.992911
ENSG00000227827	PKD1P2	-2.48054	0.973564	-2.66168	0.987768
ENSG00000114805	PLCH1	-2.51506	0.992907	-1.44723	0.971865
ENSG00000253305	PCDHGB6	-2.53336	0.962569	-1.79045	0.960026
ENSG00000151773	CCDC122	-2.54921	0.981971	-1.64623	0.972466
ENSG00000287632		-2.55249	0.952389	-2.43612	0.970923
ENSG00000159625	DRC7	-2.56693	0.983803	-2.8377	0.993353
ENSG00000106772	PRUNE2	-2.56843	0.992516	-4.19098	0.999756
ENSG00000197506	SLC28A3	-2.58166	0.996356	-1.46154	0.972271
ENSG00000154025	SLC5A10	-2.5842	0.976315	-2.97879	0.988194
ENSG00000162998	FRZB	-2.63158	0.97153	1.63378	0.977485
ENSG00000229754	CXCR2P1	-2.63231	0.99617	-2.09939	0.991274
ENSG00000236304		-2.63695	0.996082	-4.24362	0.999717
ENSG00000101282	RSPO4	-2.66173	0.99101	-1.75655	0.976894
ENSG00000156413	FUT6	-2.68999	0.962357	-4.49962	0.985526
ENSG00000265185	SNORD3B-1	-2.69918	0.99365	-1.82556	0.97988
ENSG00000269934		-2.71938	0.97314	-2.82446	0.985627
ENSG00000176510	OR10AC1	-2.72489	0.990932	-1.52477	0.968437
ENSG00000286471		-2.75037	0.989501	-1.52302	0.967365
ENSG00000254186		-2.75711	0.962797	-1.96357	0.959561
ENSG00000165757	JCAD	-2.75871	0.993562	-1.30457	0.963717
ENSG00000176049	JAKMIP2	-2.76108	0.990433	-1.7883	0.976507
ENSG00000235531	MSC-AS1	-2.78133	0.982003	-2.78604	0.989896
ENSG00000200488	RN7SKP203	-2.78812	0.996258	-2.5249	0.993528
ENSG00000269834	ZNF528-AS1	-2.80764	0.953087	-2.24531	0.96447
ENSG00000278318	ZNF229	-2.82037	0.995668	-1.54718	0.971901
ENSG00000162174	ASRGL1	-2.82305	0.996447	-2.25719	0.991598
ENSG00000137868	STRA6	-2.8354	0.996854	-1.88698	0.981982
ENSG00000125266	EFNB2	-2.8398	0.997105	-2.89679	0.997466
ENSG00000258583	LINC01500	-2.89063	0.995433	-2.09709	0.990487
ENSG00000230629	RPS23P8	-2.90709	0.991597	-3.10973	0.996095
ENSG00000232265	LINC02805	-2.9162	0.994019	-1.79247	0.978661
ENSG00000257743	MGAM2	-2.93511	0.951858	-2.2662	0.962479
ENSG00000078814	MYH7B	-2.93902	0.974327	5.11796	0.999961
ENSG00000111981	ULBP1	-2.9483	0.995482	-2.25943	0.991036
ENSG00000268758	ADGRE4P	-3.01192	0.990632	-3.36212	0.99589
ENSG00000260711		-3.01797	0.989458	-1.87719	0.976098
ENSG00000284966		-3.02257	0.967808	-2.05727	0.97075
ENSG00000183134	PTGDR2	-3.03464	0.993438	-1.40262	0.965796
ENSG00000185666	SYN3	-3.09342	0.997311	-3.35747	0.99885
ENSG00000289350		-3.11911	0.968909	-2.02072	0.97075
ENSG00000258101		-3.12152	0.986326	-2.95119	0.991501
ENSG00000230202		-3.13515	0.998034	-3.43863	0.999188
ENSG00000287080	H3C3	-3.23398	0.993357	-4.80423	0.997713
ENSG00000182983	ZNF662	-3.24725	0.992353	-3.22194	0.995783
ENSG00000172752	COL6A5	-3.28191	0.984181	-4.15567	0.993441
ENSG00000114279	FGF12	-3.3425	0.997444	-2.28191	0.990819
ENSG00000117016	RIMS3	-3.3499	0.99824	-1.76163	0.979844
ENSG00000233355	CHRM3-AS2	-3.38796	0.998279	-1.36212	0.969012
ENSG00000140481	CCDC33	-3.39001	0.990945	-2.79083	0.99258
ENSG00000161905	ALOX15	-3.42375	0.998761	-2.86322	0.997141
ENSG00000182048	TRPC2	-3.56737	0.99349	-2.75407	0.993694
ENSG00000173714	WFIKKN2	-3.64108	0.963254	-2.82778	0.975448
ENSG00000250155		-3.66691	0.979213	-2.56143	0.981215
ENSG00000280623	PCAT14	-3.67994	0.983669	-1.95975	0.970406
ENSG00000152672	CLEC4F	-3.68999	0.959111	-2.44458	0.966088
ENSG00000233073	GRM3-AS1	-3.71993	0.999188	-3.78012	0.999457
ENSG00000143603	KCNN3	-3.72652	0.978193	-2.01162	0.975656
ENSG00000133134	BEX2	-3.74246	0.961265	-1.88407	0.951108
ENSG00000235996		-3.74714	0.972003	-2.41926	0.975461
ENSG00000133519	ZDHHC8P1	-3.84854	0.992532	-2.9357	0.993532
ENSG00000164849	GPR146	-3.88525	0.993575	-2.75901	0.993434
ENSG00000173391	OLR1	-4.10503	0.969887	1.68227	0.976696
ENSG00000118733	OLFM3	-4.28709	0.999224	-4.20715	0.999558
ENSG00000147234	FRMPD3	-4.32742	0.962967	-3.26258	0.976842
ENSG00000223486		-4.43864	0.998849	-3.51412	0.998886
ENSG00000072201	LNX1	-4.48032	0.99705	-1.58855	0.977177
ENSG00000105088	OLFM2	-4.56843	0.999166	-1.73999	0.980023
ENSG00000162078	ZG16B	-4.60753	0.988627	-2.35366	0.986212
ENSG00000164199	ADGRV1	-4.84753	0.995045	-3.46521	0.996774
ENSG00000289122		-4.90135	0.998461	-3.89541	0.999084
ENSG00000289621		-5.01832	0.978056	-2.92491	0.983782
ENSG00000184697	CLDN6	-5.1274	0.991372	-2.99217	0.992534
ENSG00000173262	SLC2A14	-5.48354	0.987291	1.24692	0.962336
ENSG00000197582	GPX1P1	-5.81928	0.999785	-5.68405	0.99989
ENSG00000182308	DCAF4L1	-6.01192	0.98406	-7.26901	0.992323
ENSG00000185904	LINC00839	-6.10503	0.996887	-2.24466	0.989812
ENSG00000134201	GSTM5	-6.31014	0.988774	-1.39731	0.958018
ENSG00000164935	DCSTAMP	-6.32097	0.99367	-4.82317	0.996774
ENSG00000113946	CLDN16	-6.842	0.962983	-3.1922	0.974649
ENSG00000185736	ADARB2	-6.88347	0.994791	1.89424	0.981732
ENSG00000214776		-9.30436	0.992708	-9.30436	0.99653
ENSG00000198300	PEG3	-9.31823	0.992848	-9.31823	0.996589
